# Supplementary material
Source: publisher figshare collection journal article supplement (https://acs.figshare.com/ndownloader/files/8255132)
Supplement: Supplementary file 1 [file 8255132]

#==============================================================================

# 1. SUBMISSION DETAILS

data_global

_audit_update_record
;
2013-07-09 # Formatted by publCIF
;

_publ_contact_author
;
        Constantin G. Daniliuc
        Organisch-Chemisches Institut 
        Westf\"alische Wilhelm-Universit\"at M\"unster
        48149 M\"unster
        Germany
;
_publ_contact_author_phone        '049 251 83-36522'
_publ_contact_author_fax          '049 251 83-39772'
_publ_contact_author_email        'constantin.daniliuc@uni-muenster.de' 
_publ_requested_journal           '.'

#==============================================================================

# 3. TITLE AND AUTHOR LIST

_publ_section_title
;
Cp*Rh(III)/Olefin co-catalyzed amidation of C-H Bond by Intramolecular amide
transfer.
;

loop_
 _publ_author_name
 _publ_author_address
     'Wang, Xiaoming'
;     Organisch-Chemisches Institut
      Westf\"alische Wilhelms-Universit\"at M\"unster
      Corrensstrasse 40
      48149 M\"unster
      Germany
;     
     'Gensch, Tobias'
;     Organisch-Chemisches Institut
      Westf\"alische Wilhelms-Universit\"at M\"unster
      Corrensstrasse 40
      48149 M\"unster
      Germany
;     
     'Lerchen, Andreas'
;     Organisch-Chemisches Institut
      Westf\"alische Wilhelms-Universit\"at M\"unster
      Corrensstrasse 40
      48149 M\"unster
      Germany
;     
     'Daniliuc, Constantin G.'
;     Organisch-Chemisches Institut
      Westf\"alische Wilhelms-Universit\"at M\"unster
      Corrensstrasse 40
      48149 M\"unster
      Germany
;     
     'Glorius, Frank'
;     Organisch-Chemisches Institut
      Westf\"alische Wilhelms-Universit\"at M\"unster
      Corrensstrasse 40
      48149 M\"unster
      Germany
;     

#=============================================================================
#  cif data for "glo8705" (compound 3r)
#============================================================================= 

data_glo8705
_chemical_name_systematic               ?
_chemical_name_common                   ?
_chemical_formula_moiety                ?
_chemical_formula_sum                   'C17 H24 N2 O6'
_chemical_formula_iupac                 ?
_chemical_formula_weight                352.38
_chemical_absolute_configuration        ad

_chemical_melting_point                 ?

_space_group_crystal_system             orthorhombic
_space_group_name_H-M_alt               'P 21 21 2'
_space_group_name_Hall                  'P 2 2ab'
loop_
    _space_group_symop_operation_xyz
    'x, y, z'
    '-x, -y, z'
    '-x+1/2, y+1/2, -z'
    'x+1/2, -y+1/2, -z'

_cell_length_a                          13.7749(14)
_cell_length_b                          21.091(2)
_cell_length_c                          7.3456(7)
_cell_angle_alpha                       90
_cell_angle_beta                        90
_cell_angle_gamma                       90
_cell_volume                            2134.1(4)
_cell_formula_units_Z                   4
_cell_measurement_reflns_used           1863
_cell_measurement_theta_min             3.8328
_cell_measurement_theta_max             65.6260
_cell_measurement_temperature           100.(2)

_exptl_crystal_description              needle
_exptl_crystal_colour                   colourless
_exptl_crystal_size_max                 0.240
_exptl_crystal_size_mid                 0.040
_exptl_crystal_size_min                 0.040
_exptl_crystal_density_diffrn           1.097
_exptl_crystal_density_meas             ?
_exptl_crystal_density_method           'not measured'
_exptl_crystal_F_000                    752

_exptl_absorpt_coefficient_mu           0.696
_exptl_absorpt_correction_type          multi-scan
_exptl_absorpt_process_details          
;
Bruker AXS (2014). SADABS, Version 2014/2, Bruker AXS Inc., Madison, Wisconsin,
USA.
;
_exptl_absorpt_correction_T_min         0.81
_exptl_absorpt_correction_T_max         0.97

_exptl_special_details                  
;
; 

_diffrn_ambient_temperature             100.(2)

_diffrn_source                          'fine-focus sealed tube'
_diffrn_source_type                     'fine-focus sealed tube'

_diffrn_radiation_type                  CuK\a
_diffrn_radiation_wavelength            1.54178
_diffrn_radiation_monochromator         graphite

_diffrn_measurement_device_type         'KappaCCD APEXII'
_diffrn_measurement_method              'phi / omega scans'

_diffrn_detector_area_resol_mean        8.3333

_diffrn_reflns_number                   19509
_diffrn_reflns_av_R_equivalents         0.1214
_diffrn_reflns_av_unetI/netI            0.1174
_diffrn_reflns_theta_min                4.19
_diffrn_reflns_theta_max                66.75
_diffrn_reflns_theta_full               66.75
_diffrn_measured_fraction_theta_max     0.996
_diffrn_measured_fraction_theta_full    0.996
_diffrn_reflns_limit_h_min              -16
_diffrn_reflns_limit_h_max              14
_diffrn_reflns_limit_k_min              -25
_diffrn_reflns_limit_k_max              24
_diffrn_reflns_limit_l_min              -8
_diffrn_reflns_limit_l_max              8

_refine_special_details                 
;

Reflections were merged by SHELXL according to the crystal
class for the calculation of statistics and refinement.

_reflns_Friedel_fraction is defined as the number of unique
Friedel pairs measured divided by the number that would be
possible theoretically, ignoring centric projections and
systematic absences.

One disordered over two positions tBu group was found in 
the asymmetrical unit. Several restraints (SADI, SAME, ISOR and SIMU)
were used in order to improve refinement stability. 

A badly disordered penatane molecule was found in the 
asymmetrical unit and could not be satisfactorily refined. The program 
SQUEEZE (Spek, A.L. (2015). Acta Cryst. C71, 9-18) was therefore used to
remove mathematically the effect of the solvent.
The quoted formula and derived parameters are not included the squeezed
solvent molecule. 
;

_reflns_number_total                    3762
_reflns_number_gt                       2805
_reflns_threshold_expression            'I > 2\s(I)'

_refine_ls_structure_factor_coef        Fsqd
_refine_ls_matrix_type                  full
_refine_ls_R_factor_all                 0.0789
_refine_ls_R_factor_gt                  0.0521
_refine_ls_wR_factor_gt                 0.1197
_refine_ls_wR_factor_ref                0.1359
_refine_ls_goodness_of_fit_ref          1.043
_refine_ls_restrained_S_all             1.045
_refine_ls_number_reflns                3762
_refine_ls_number_parameters            275
_refine_ls_number_restraints            77
_refine_ls_number_constraints           ?
_refine_ls_hydrogen_treatment           mixed
_refine_ls_weighting_scheme             calc
_refine_ls_weighting_details            
    'w=1/[\s^2^(Fo^2^)+0.2318P] where P=(Fo^2^+2Fc^2^)/3'

_atom_sites_solution_hydrogens          mixed
_atom_sites_solution_primary            ?
_atom_sites_solution_secondary          ?

_refine_ls_shift/su_max                 0.000
_refine_ls_shift/su_mean                0.000
_refine_diff_density_max                0.212
_refine_diff_density_min                -0.217
_refine_ls_extinction_method            'SHELXL-2014/7 (Sheldrick 2014'
_refine_ls_extinction_coef              0.0040(7)
_refine_ls_abs_structure_details        
;

Flack x determined using 957 quotients [(I+)-(I-)]/[(I+)+(I-)]
(Parsons, Flack and Wagner, Acta Cryst. B69 (2013) 249-259).
;
_refine_ls_abs_structure_Flack          0.2(3)

loop_
    _atom_type_symbol
    _atom_type_description
    _atom_type_scat_dispersion_real
    _atom_type_scat_dispersion_imag
    _atom_type_scat_source
    C C 0.0181 0.0091 'International Tables Vol C Tables 4.2.6.8 and 6.1.1.4'
    H H 0.0000 0.0000 'International Tables Vol C Tables 4.2.6.8 and 6.1.1.4'
    N N 0.0311 0.0180 'International Tables Vol C Tables 4.2.6.8 and 6.1.1.4'
    O O 0.0492 0.0322 'International Tables Vol C Tables 4.2.6.8 and 6.1.1.4'

_computing_data_collection              
    'APEX2 v.2014.1--1 (Bruker AXS Inc., 2014)'
_computing_cell_refinement              'SAINT V8.34A (Bruker AXS Inc., 2013)'
_computing_data_reduction               'SAINT V8.34A (Bruker AXS Inc., 2013)'
_computing_structure_solution           'SHELXL--2014 (Sheldrick, 2014)'
_computing_structure_refinement         'SHELXL-2014/7 (Sheldrick, 2014)'
_computing_molecular_graphics           
    'APEX2 v.2014.1--1 (Bruker AXS Inc., 2014)'
_computing_publication_material         
    'APEX2 v.2014.1--1 (Bruker AXS Inc., 2014)'

loop_
    _atom_site_type_symbol
    _atom_site_label
    _atom_site_fract_x
    _atom_site_fract_y
    _atom_site_fract_z
    _atom_site_U_iso_or_equiv
    _atom_site_adp_type
    _atom_site_calc_flag
    _atom_site_refinement_flags_adp
    _atom_site_refinement_flags_occupancy
    _atom_site_refinement_flags_posn
    _atom_site_occupancy
    _atom_site_disorder_assembly
    _atom_site_disorder_group
    N N1 0.3921(3) 0.16344(16) 0.4153(5) 0.0284(8) Uani d . . D 1.0 . .
    H H1 0.369(4) 0.135(2) 0.494(7) 0.065(18) Uiso d . . D 1.0 . .
    N N2 0.6452(3) 0.45925(16) 0.3160(5) 0.0297(8) Uani d . . D 1.0 . .
    H H2 0.602(5) 0.479(4) 0.248(10) 0.11(3) Uiso d . . D 1.0 . .
    O O1 0.4146(2) 0.16197(13) 0.7745(4) 0.0318(7) Uani d . . . 1.0 . .
    H H1A 0.432(5) 0.167(3) 0.908(10) 0.069(18) Uiso d . . . 1.0 . .
    O O2 0.4402(3) 0.18224(14) 0.1256(4) 0.0429(9) Uani d . . . 1.0 . .
    O O3 0.6528(3) 0.35695(16) 0.0640(4) 0.0487(9) Uani d . . . 1.0 . .
    O O4 0.6870(2) 0.29375(14) 0.3012(5) 0.0372(8) Uani d . . . 1.0 . .
    O O5 0.8013(2) 0.45571(14) 0.4125(5) 0.0400(8) Uani d . . . 1.0 . .
    O O6 0.7347(2) 0.54542(13) 0.2900(5) 0.0350(8) Uani d . . . 1.0 . .
    C C1 0.4407(3) 0.21701(18) 0.6879(6) 0.0268(9) Uani d . . . 1.0 . .
    C C2 0.4277(3) 0.21893(18) 0.4999(6) 0.0266(10) Uani d . . . 1.0 . .
    C C3 0.4501(3) 0.27492(18) 0.4074(6) 0.0267(9) Uani d . . . 1.0 . .
    H H3 0.4397 0.2771 0.2797 0.032 Uiso calc U . R 1.0 . .
    C C4 0.4870(3) 0.32725(19) 0.4971(6) 0.0271(10) Uani d . . . 1.0 . .
    C C5 0.5025(4) 0.3235(2) 0.6848(6) 0.0341(11) Uani d . . . 1.0 . .
    H H5 0.5291 0.3587 0.7484 0.041 Uiso calc U . R 1.0 . .
    C C6 0.4792(4) 0.2684(2) 0.7783(6) 0.0343(11) Uani d . . . 1.0 . .
    H H6 0.4898 0.2662 0.9059 0.041 Uiso calc U . R 1.0 . .
    C C7 0.4003(3) 0.1471(2) 0.2393(6) 0.0314(10) Uani d . . . 1.0 . .
    C C8 0.3619(5) 0.0841(2) 0.1830(7) 0.0470(13) Uani d . . . 1.0 . .
    H H8A 0.3093 0.09 0.0947 0.07 Uiso calc U . R 1.0 . .
    H H8B 0.337 0.0616 0.29 0.07 Uiso calc U . R 1.0 . .
    H H8C 0.4141 0.0592 0.1271 0.07 Uiso calc U . R 1.0 . .
    C C9 0.5139(3) 0.38737(19) 0.3983(6) 0.0304(10) Uani d . . . 1.0 . .
    H H9A 0.49 0.4242 0.4689 0.037 Uiso calc U . R 1.0 . .
    H H9B 0.481 0.3879 0.2784 0.037 Uiso calc U . R 1.0 . .
    C C10 0.6244(3) 0.39451(18) 0.3687(6) 0.0274(10) Uani d . . . 1.0 . .
    H H10 0.6588 0.3848 0.4853 0.033 Uiso calc U . R 1.0 . .
    C C11 0.6565(3) 0.34775(19) 0.2245(6) 0.0310(10) Uani d . . . 1.0 . .
    C C12 0.7077(4) 0.2423(2) 0.1753(8) 0.0458(13) Uani d . . . 1.0 . .
    H H12A 0.6469 0.2269 0.122 0.069 Uiso calc U . R 1.0 . .
    H H12B 0.7397 0.2076 0.2407 0.069 Uiso calc U . R 1.0 . .
    H H12C 0.7505 0.2576 0.0783 0.069 Uiso calc U . R 1.0 . .
    C C13 0.7340(4) 0.4842(2) 0.3440(6) 0.0299(10) Uani d . . . 1.0 . .
    C C14 0.8251(4) 0.5828(2) 0.2984(8) 0.0446(13) Uani d . . D 1.0 . .
    C C15 0.9130(19) 0.5511(10) 0.219(5) 0.046(6) Uani d U P D 0.35(4) A 1
    H H15A 0.8995 0.5389 0.0924 0.069 Uiso calc U P R 0.35(4) A 1
    H H15B 0.9287 0.5132 0.29 0.069 Uiso calc U P R 0.35(4) A 1
    H H15C 0.968 0.5805 0.2216 0.069 Uiso calc U P R 0.35(4) A 1
    C C16 0.800(3) 0.6452(13) 0.208(5) 0.045(8) Uani d U P D 0.35(4) A 1
    H H16A 0.7743 0.6372 0.0862 0.068 Uiso calc U P R 0.35(4) A 1
    H H16B 0.8592 0.6712 0.1984 0.068 Uiso calc U P R 0.35(4) A 1
    H H16C 0.7519 0.6677 0.2812 0.068 Uiso calc U P R 0.35(4) A 1
    C C17 0.842(3) 0.5928(16) 0.505(2) 0.059(9) Uani d U P D 0.35(4) A 1
    H H17A 0.7806 0.6037 0.564 0.089 Uiso calc U P R 0.35(4) A 1
    H H17B 0.8888 0.6273 0.5233 0.089 Uiso calc U P R 0.35(4) A 1
    H H17C 0.8678 0.5537 0.5587 0.089 Uiso calc U P R 0.35(4) A 1
    C C15A 0.8896(12) 0.5580(8) 0.142(3) 0.052(4) Uani d U P D 0.65(4) A 2
    H H15D 0.9107 0.5147 0.1696 0.078 Uiso calc U P R 0.65(4) A 2
    H H15E 0.9467 0.5854 0.1292 0.078 Uiso calc U P R 0.65(4) A 2
    H H15F 0.8526 0.5582 0.0282 0.078 Uiso calc U P R 0.65(4) A 2
    C C16A 0.7861(17) 0.6495(8) 0.255(3) 0.046(4) Uani d U P D 0.65(4) A 2
    H H16D 0.7546 0.6491 0.1351 0.07 Uiso calc U P R 0.65(4) A 2
    H H16E 0.8399 0.6798 0.2538 0.07 Uiso calc U P R 0.65(4) A 2
    H H16F 0.7387 0.662 0.3477 0.07 Uiso calc U P R 0.65(4) A 2
    C C17A 0.8728(16) 0.5831(9) 0.481(2) 0.055(4) Uani d U P D 0.65(4) A 2
    H H17D 0.8233 0.5875 0.576 0.083 Uiso calc U P R 0.65(4) A 2
    H H17E 0.9183 0.6187 0.4883 0.083 Uiso calc U P R 0.65(4) A 2
    H H17F 0.908 0.5432 0.4987 0.083 Uiso calc U P R 0.65(4) A 2

loop_
    _atom_site_aniso_label
    _atom_site_aniso_U_11
    _atom_site_aniso_U_22
    _atom_site_aniso_U_33
    _atom_site_aniso_U_12
    _atom_site_aniso_U_13
    _atom_site_aniso_U_23
    N1 0.030(2) 0.0282(17) 0.0273(18) -0.0057(15) 0.0039(17) 0.0035(15)
    N2 0.032(2) 0.0248(16) 0.0319(18) -0.0064(16) -0.0025(17) 0.0049(15)
    O1 0.044(2) 0.0279(14) 0.0237(16) -0.0039(12) 0.0025(13) 0.0037(11)
    O2 0.067(3) 0.0390(17) 0.0224(16) -0.0172(16) 0.0031(16) -0.0004(13)
    O3 0.062(3) 0.0533(19) 0.0310(19) 0.0061(17) -0.0020(16) -0.0050(15)
    O4 0.037(2) 0.0310(15) 0.0433(17) 0.0013(13) 0.0060(15) -0.0018(14)
    O5 0.0278(19) 0.0325(15) 0.060(2) 0.0014(14) -0.0104(17) 0.0042(16)
    O6 0.0265(18) 0.0290(15) 0.0495(18) -0.0031(12) -0.0044(14) 0.0081(14)
    C1 0.027(3) 0.025(2) 0.029(2) -0.0003(17) 0.0036(19) 0.0010(16)
    C2 0.023(3) 0.030(2) 0.027(2) 0.0022(17) 0.0040(19) -0.0001(17)
    C3 0.028(3) 0.0286(19) 0.0240(19) 0.0006(17) 0.002(2) 0.0032(17)
    C4 0.026(3) 0.029(2) 0.026(2) -0.0002(17) 0.0026(19) 0.0010(18)
    C5 0.041(3) 0.029(2) 0.032(2) -0.0042(19) 0.004(2) -0.0019(18)
    C6 0.043(3) 0.036(2) 0.024(2) -0.0016(19) -0.003(2) 0.0006(19)
    C7 0.035(3) 0.035(2) 0.024(2) -0.0060(19) -0.0017(19) -0.0011(18)
    C8 0.063(4) 0.043(3) 0.035(2) -0.018(2) -0.003(3) -0.001(2)
    C9 0.032(3) 0.028(2) 0.031(2) -0.0017(18) 0.000(2) 0.0030(19)
    C10 0.027(3) 0.0263(19) 0.029(2) -0.0030(17) -0.0029(17) -0.0001(16)
    C11 0.031(3) 0.032(2) 0.030(2) -0.0022(18) -0.0001(19) -0.0004(18)
    C12 0.046(3) 0.031(2) 0.061(3) 0.005(2) 0.007(3) -0.017(2)
    C13 0.033(3) 0.025(2) 0.032(2) -0.0047(19) 0.003(2) 0.0005(17)
    C14 0.026(3) 0.027(2) 0.080(4) -0.0080(19) 0.001(3) 0.003(2)
    C15 0.030(10) 0.044(8) 0.063(14) 0.005(7) 0.002(9) 0.008(9)
    C16 0.037(14) 0.035(10) 0.063(14) -0.008(8) 0.006(11) 0.012(9)
    C17 0.038(15) 0.039(12) 0.101(14) -0.023(10) -0.013(10) -0.003(9)
    C15A 0.033(6) 0.053(6) 0.070(9) -0.006(5) 0.006(6) -0.003(6)
    C16A 0.034(7) 0.038(6) 0.067(9) -0.006(4) 0.011(6) 0.009(5)
    C17A 0.035(9) 0.047(6) 0.084(8) -0.001(6) -0.014(6) -0.002(5)

_geom_special_details                   
;

All esds (except the esd in the dihedral angle between two l.s. planes)
are estimated using the full covariance matrix.  The cell esds are taken
into account individually in the estimation of esds in distances, angles
and torsion angles; correlations between esds in cell parameters are only
used when they are defined by crystal symmetry.  An approximate (isotropic)
treatment of cell esds is used for estimating esds involving l.s. planes.
;

loop_
    _geom_bond_atom_site_label_1
    _geom_bond_atom_site_label_2
    _geom_bond_site_symmetry_2
    _geom_bond_distance
    _geom_bond_publ_flag
    N1 C7 . 1.343(6) ?
    N1 C2 . 1.413(5) ?
    N1 H1 . 0.88(3) ?
    N2 C13 . 1.347(6) ?
    N2 C10 . 1.448(5) ?
    N2 H2 . 0.89(3) ?
    O1 C1 . 1.372(5) ?
    O1 H1A . 1.02(7) ?
    O2 C7 . 1.245(5) ?
    O3 C11 . 1.196(6) ?
    O4 C11 . 1.339(5) ?
    O4 C12 . 1.454(6) ?
    O5 C13 . 1.214(6) ?
    O6 C13 . 1.351(5) ?
    O6 C14 . 1.476(6) ?
    C1 C6 . 1.378(6) ?
    C1 C2 . 1.393(6) ?
    C2 C3 . 1.397(6) ?
    C3 C4 . 1.382(6) ?
    C3 H3 . 0.95 ?
    C4 C5 . 1.398(6) ?
    C4 C9 . 1.507(6) ?
    C5 C6 . 1.388(6) ?
    C5 H5 . 0.95 ?
    C6 H6 . 0.95 ?
    C7 C8 . 1.488(6) ?
    C8 H8A . 0.98 ?
    C8 H8B . 0.98 ?
    C8 H8C . 0.98 ?
    C9 C10 . 1.545(7) ?
    C9 H9A . 0.99 ?
    C9 H9B . 0.99 ?
    C10 C11 . 1.514(6) ?
    C10 H10 . 1.0 ?
    C12 H12A . 0.98 ?
    C12 H12B . 0.98 ?
    C12 H12C . 0.98 ?
    C14 C17A . 1.494(12) ?
    C14 C15 . 1.502(15) ?
    C14 C16 . 1.513(16) ?
    C14 C16A . 1.539(11) ?
    C14 C15A . 1.544(11) ?
    C14 C17 . 1.551(16) ?
    C15 H15A . 0.98 ?
    C15 H15B . 0.98 ?
    C15 H15C . 0.98 ?
    C16 H16A . 0.98 ?
    C16 H16B . 0.98 ?
    C16 H16C . 0.98 ?
    C17 H17A . 0.98 ?
    C17 H17B . 0.98 ?
    C17 H17C . 0.98 ?
    C15A H15D . 0.98 ?
    C15A H15E . 0.98 ?
    C15A H15F . 0.98 ?
    C16A H16D . 0.98 ?
    C16A H16E . 0.98 ?
    C16A H16F . 0.98 ?
    C17A H17D . 0.98 ?
    C17A H17E . 0.98 ?
    C17A H17F . 0.98 ?

loop_
    _geom_angle_atom_site_label_1
    _geom_angle_atom_site_label_2
    _geom_angle_atom_site_label_3
    _geom_angle_site_symmetry_1
    _geom_angle_site_symmetry_3
    _geom_angle
    _geom_angle_publ_flag
    C7 N1 C2 . . 127.4(4) ?
    C7 N1 H1 . . 119.(4) ?
    C2 N1 H1 . . 113.(4) ?
    C13 N2 C10 . . 120.5(4) ?
    C13 N2 H2 . . 121.(6) ?
    C10 N2 H2 . . 118.(6) ?
    C1 O1 H1A . . 107.(3) ?
    C11 O4 C12 . . 115.4(4) ?
    C13 O6 C14 . . 120.3(3) ?
    O1 C1 C6 . . 122.9(4) ?
    O1 C1 C2 . . 116.8(4) ?
    C6 C1 C2 . . 120.3(4) ?
    C1 C2 C3 . . 118.6(4) ?
    C1 C2 N1 . . 117.2(4) ?
    C3 C2 N1 . . 124.3(4) ?
    C4 C3 C2 . . 121.7(4) ?
    C4 C3 H3 . . 119.2 ?
    C2 C3 H3 . . 119.2 ?
    C3 C4 C5 . . 118.8(4) ?
    C3 C4 C9 . . 122.2(4) ?
    C5 C4 C9 . . 119.0(4) ?
    C6 C5 C4 . . 120.0(4) ?
    C6 C5 H5 . . 120.0 ?
    C4 C5 H5 . . 120.0 ?
    C1 C6 C5 . . 120.6(4) ?
    C1 C6 H6 . . 119.7 ?
    C5 C6 H6 . . 119.7 ?
    O2 C7 N1 . . 122.0(4) ?
    O2 C7 C8 . . 120.2(4) ?
    N1 C7 C8 . . 117.9(4) ?
    C7 C8 H8A . . 109.5 ?
    C7 C8 H8B . . 109.5 ?
    H8A C8 H8B . . 109.5 ?
    C7 C8 H8C . . 109.5 ?
    H8A C8 H8C . . 109.5 ?
    H8B C8 H8C . . 109.5 ?
    C4 C9 C10 . . 113.1(4) ?
    C4 C9 H9A . . 109.0 ?
    C10 C9 H9A . . 109.0 ?
    C4 C9 H9B . . 109.0 ?
    C10 C9 H9B . . 109.0 ?
    H9A C9 H9B . . 107.8 ?
    N2 C10 C11 . . 111.6(3) ?
    N2 C10 C9 . . 109.0(3) ?
    C11 C10 C9 . . 108.8(4) ?
    N2 C10 H10 . . 109.1 ?
    C11 C10 H10 . . 109.1 ?
    C9 C10 H10 . . 109.1 ?
    O3 C11 O4 . . 124.5(4) ?
    O3 C11 C10 . . 124.9(4) ?
    O4 C11 C10 . . 110.6(4) ?
    O4 C12 H12A . . 109.5 ?
    O4 C12 H12B . . 109.5 ?
    H12A C12 H12B . . 109.5 ?
    O4 C12 H12C . . 109.5 ?
    H12A C12 H12C . . 109.5 ?
    H12B C12 H12C . . 109.5 ?
    O5 C13 N2 . . 124.3(4) ?
    O5 C13 O6 . . 126.2(4) ?
    N2 C13 O6 . . 109.5(4) ?
    O6 C14 C17A . . 114.3(9) ?
    O6 C14 C15 . . 115.2(12) ?
    O6 C14 C16 . . 104.9(18) ?
    C15 C14 C16 . . 113.4(13) ?
    O6 C14 C16A . . 100.6(10) ?
    C17A C14 C16A . . 109.7(10) ?
    O6 C14 C15A . . 105.9(6) ?
    C17A C14 C15A . . 114.6(8) ?
    C16A C14 C15A . . 110.9(9) ?
    O6 C14 C17 . . 104.0(13) ?
    C15 C14 C17 . . 108.7(11) ?
    C16 C14 C17 . . 110.2(13) ?
    C14 C15 H15A . . 109.5 ?
    C14 C15 H15B . . 109.5 ?
    H15A C15 H15B . . 109.5 ?
    C14 C15 H15C . . 109.5 ?
    H15A C15 H15C . . 109.5 ?
    H15B C15 H15C . . 109.5 ?
    C14 C16 H16A . . 109.5 ?
    C14 C16 H16B . . 109.5 ?
    H16A C16 H16B . . 109.5 ?
    C14 C16 H16C . . 109.5 ?
    H16A C16 H16C . . 109.5 ?
    H16B C16 H16C . . 109.5 ?
    C14 C17 H17A . . 109.5 ?
    C14 C17 H17B . . 109.5 ?
    H17A C17 H17B . . 109.5 ?
    C14 C17 H17C . . 109.5 ?
    H17A C17 H17C . . 109.5 ?
    H17B C17 H17C . . 109.5 ?
    C14 C15A H15D . . 109.5 ?
    C14 C15A H15E . . 109.5 ?
    H15D C15A H15E . . 109.5 ?
    C14 C15A H15F . . 109.5 ?
    H15D C15A H15F . . 109.5 ?
    H15E C15A H15F . . 109.5 ?
    C14 C16A H16D . . 109.5 ?
    C14 C16A H16E . . 109.5 ?
    H16D C16A H16E . . 109.5 ?
    C14 C16A H16F . . 109.5 ?
    H16D C16A H16F . . 109.5 ?
    H16E C16A H16F . . 109.5 ?
    C14 C17A H17D . . 109.5 ?
    C14 C17A H17E . . 109.5 ?
    H17D C17A H17E . . 109.5 ?
    C14 C17A H17F . . 109.5 ?
    H17D C17A H17F . . 109.5 ?
    H17E C17A H17F . . 109.5 ?

loop_
    _geom_torsion_atom_site_label_1
    _geom_torsion_atom_site_label_2
    _geom_torsion_atom_site_label_3
    _geom_torsion_atom_site_label_4
    _geom_torsion_site_symmetry_1
    _geom_torsion_site_symmetry_2
    _geom_torsion_site_symmetry_3
    _geom_torsion_site_symmetry_4
    _geom_torsion
    _geom_torsion_publ_flag
    O1 C1 C2 C3 . . . . 177.7(4) ?
    C6 C1 C2 C3 . . . . -3.0(7) ?
    O1 C1 C2 N1 . . . . -2.2(6) ?
    C6 C1 C2 N1 . . . . 177.1(4) ?
    C7 N1 C2 C1 . . . . -158.8(4) ?
    C7 N1 C2 C3 . . . . 21.3(7) ?
    C1 C2 C3 C4 . . . . 1.7(7) ?
    N1 C2 C3 C4 . . . . -178.3(4) ?
    C2 C3 C4 C5 . . . . 0.4(7) ?
    C2 C3 C4 C9 . . . . 178.4(4) ?
    C3 C4 C5 C6 . . . . -1.3(7) ?
    C9 C4 C5 C6 . . . . -179.4(4) ?
    O1 C1 C6 C5 . . . . -178.7(4) ?
    C2 C1 C6 C5 . . . . 2.1(7) ?
    C4 C5 C6 C1 . . . . 0.1(8) ?
    C2 N1 C7 O2 . . . . -2.0(7) ?
    C2 N1 C7 C8 . . . . 176.5(5) ?
    C3 C4 C9 C10 . . . . -102.2(5) ?
    C5 C4 C9 C10 . . . . 75.8(5) ?
    C13 N2 C10 C11 . . . . -83.5(5) ?
    C13 N2 C10 C9 . . . . 156.3(4) ?
    C4 C9 C10 N2 . . . . -165.8(3) ?
    C4 C9 C10 C11 . . . . 72.2(4) ?
    C12 O4 C11 O3 . . . . -5.9(7) ?
    C12 O4 C11 C10 . . . . 172.3(4) ?
    N2 C10 C11 O3 . . . . -35.6(6) ?
    C9 C10 C11 O3 . . . . 84.7(5) ?
    N2 C10 C11 O4 . . . . 146.2(4) ?
    C9 C10 C11 O4 . . . . -93.5(4) ?
    C10 N2 C13 O5 . . . . 0.2(7) ?
    C10 N2 C13 O6 . . . . -177.8(4) ?
    C14 O6 C13 O5 . . . . 4.9(7) ?
    C14 O6 C13 N2 . . . . -177.1(4) ?
    C13 O6 C14 C17A . . . . -53.8(10) ?
    C13 O6 C14 C15 . . . . 48.2(17) ?
    C13 O6 C14 C16 . . . . 173.7(15) ?
    C13 O6 C14 C16A . . . . -171.3(10) ?
    C13 O6 C14 C15A . . . . 73.2(11) ?
    C13 O6 C14 C17 . . . . -70.6(16) ?

loop_
    _geom_hbond_atom_site_label_D
    _geom_hbond_atom_site_label_H
    _geom_hbond_atom_site_label_A
    _geom_hbond_site_symmetry_A
    _geom_hbond_distance_DH
    _geom_hbond_distance_HA
    _geom_hbond_distance_DA
    _geom_hbond_angle_DHA
    _geom_hbond_publ_flag
    N1 H1 O5 4_456 0.88(3) 2.25(3) 3.079(5) 157.(6) ?
    O1 H1A O2 1_556 1.02(7) 1.63(7) 2.638(4) 169.(6) ?

_shelx_res_file                         
;


    glo8705.res created by SHELXL-2014/7


TITL glo8705.res in P2(1)2(1)2
CELL  1.54178  13.7749  21.0908   7.3456   90.000   90.000   90.000
ZERR    4.000   0.0014   0.0020   0.0007    0.000    0.000    0.000
LATT -1
SYMM -X, -Y, Z
SYMM 1/2-X, 1/2+Y, -Z
SYMM 1/2+X, 1/2-Y, -Z
SFAC C  H  N  O
UNIT 68  96  8  24
SIZE 0.040 0.040 0.240
TEMP -173.160
ACTA
CONF

L.S. 20
BOND $H
FMAP 2
PLAN 10

EQIV $1 x-1/2, -y+1/2, -z+1
HTAB N1 O5_$1
EQIV $2 x, y, z+1
HTAB O1 O2_$2

OMIT     2   5   0
OMIT     1   1   0

DFIX 0.88 N1 H1
DFIX 0.88 N2 H2

ABIN
WGHT    0.000000    0.231800
EXTI    0.003975
FVAR       0.58400   0.35025
N1    3    0.392148    0.163436    0.415314    11.00000    0.02971    0.02825 =
         0.02731    0.00351    0.00387   -0.00566
H1    2    0.369358    0.135472    0.493832    11.00000    0.06475
N2    3    0.645239    0.459249    0.315955    11.00000    0.03235    0.02483 =
         0.03193    0.00486   -0.00249   -0.00644
H2    2    0.601693    0.479259    0.248361    11.00000    0.11060
O1    4    0.414586    0.161974    0.774483    11.00000    0.04370    0.02794 =
         0.02371    0.00369    0.00253   -0.00391
H1A   2    0.432175    0.167159    0.908348    11.00000    0.06869
O2    4    0.440202    0.182236    0.125643    11.00000    0.06721    0.03897 =
         0.02237   -0.00045    0.00310   -0.01717
O3    4    0.652816    0.356949    0.063973    11.00000    0.06163    0.05335 =
         0.03100   -0.00498   -0.00196    0.00611
O4    4    0.687026    0.293750    0.301194    11.00000    0.03719    0.03099 =
         0.04333   -0.00182    0.00600    0.00127
O5    4    0.801299    0.455715    0.412532    11.00000    0.02777    0.03251 =
         0.05965    0.00416   -0.01036    0.00137
O6    4    0.734672    0.545420    0.289970    11.00000    0.02650    0.02896 =
         0.04949    0.00813   -0.00438   -0.00314
C1    1    0.440693    0.217008    0.687893    11.00000    0.02693    0.02450 =
         0.02910    0.00102    0.00364   -0.00033
C2    1    0.427663    0.218935    0.499936    11.00000    0.02269    0.03038 =
         0.02676   -0.00013    0.00405    0.00221
C3    1    0.450094    0.274922    0.407449    11.00000    0.02768    0.02856 =
         0.02400    0.00316    0.00179    0.00058
AFIX  43
H3    2    0.439726    0.277078    0.279740    11.00000   -1.20000
AFIX   0
C4    1    0.486988    0.327251    0.497068    11.00000    0.02634    0.02879 =
         0.02611    0.00096    0.00256   -0.00020
C5    1    0.502545    0.323534    0.684796    11.00000    0.04084    0.02927 =
         0.03208   -0.00185    0.00356   -0.00423
AFIX  43
H5    2    0.529106    0.358718    0.748354    11.00000   -1.20000
AFIX   0
C6    1    0.479182    0.268435    0.778327    11.00000    0.04292    0.03558 =
         0.02441    0.00064   -0.00254   -0.00157
AFIX  43
H6    2    0.489827    0.266151    0.905938    11.00000   -1.20000
AFIX   0
C7    1    0.400265    0.147082    0.239270    11.00000    0.03498    0.03538 =
         0.02388   -0.00109   -0.00175   -0.00603
C8    1    0.361902    0.084104    0.182965    11.00000    0.06301    0.04263 =
         0.03536   -0.00121   -0.00275   -0.01821
AFIX 137
H8A   2    0.309318    0.089987    0.094703    11.00000   -1.50000
H8B   2    0.337014    0.061613    0.289972    11.00000   -1.50000
H8C   2    0.414112    0.059239    0.127139    11.00000   -1.50000
AFIX   0
C9    1    0.513866    0.387368    0.398268    11.00000    0.03199    0.02796 =
         0.03139    0.00304    0.00011   -0.00169
AFIX  23
H9A   2    0.489950    0.424156    0.468949    11.00000   -1.20000
H9B   2    0.480970    0.387892    0.278450    11.00000   -1.20000
AFIX   0
C10   1    0.624361    0.394510    0.368742    11.00000    0.02665    0.02625 =
         0.02939   -0.00007   -0.00286   -0.00303
AFIX  13
H10   2    0.658821    0.384823    0.485289    11.00000   -1.20000
AFIX   0
C11   1    0.656470    0.347752    0.224464    11.00000    0.03109    0.03221 =
         0.02962   -0.00042   -0.00006   -0.00217
C12   1    0.707729    0.242273    0.175288    11.00000    0.04558    0.03087 =
         0.06109   -0.01724    0.00668    0.00476
AFIX 137
H12A  2    0.646901    0.226893    0.122018    11.00000   -1.50000
H12B  2    0.739721    0.207592    0.240744    11.00000   -1.50000
H12C  2    0.750513    0.257648    0.078268    11.00000   -1.50000
AFIX   0
C13   1    0.734036    0.484198    0.344007    11.00000    0.03322    0.02460 =
         0.03177    0.00046    0.00251   -0.00471

SIMU 0.02 0.04 0.9 C14 > c17A
SAME c14 c15a c16a c17a
SADI c14 c15 c14 c16 c14 c17
SADI c15 c16 c15 c17 c16 c17
ISOR 0.007 C15 > c17A

C14   1    0.825098    0.582816    0.298410    11.00000    0.02643    0.02736 =
         0.08014    0.00341    0.00130   -0.00800
PART 1 21
C15   1    0.912953    0.551077    0.218685    21.00000    0.03045    0.04424 =
         0.06343    0.00815    0.00230    0.00538
AFIX 137
H15A  2    0.899485    0.538888    0.092446    21.00000   -1.50000
H15B  2    0.928669    0.513164    0.289965    21.00000   -1.50000
H15C  2    0.968034    0.580469    0.221623    21.00000   -1.50000
AFIX   0
C16   1    0.800435    0.645225    0.208085    21.00000    0.03730    0.03496 =
         0.06315    0.01166    0.00566   -0.00788
AFIX 137
H16A  2    0.774295    0.637212    0.086154    21.00000   -1.50000
H16B  2    0.859173    0.671223    0.198377    21.00000   -1.50000
H16C  2    0.751857    0.667673    0.281204    21.00000   -1.50000
AFIX   0
C17   1    0.842147    0.592790    0.505115    21.00000    0.03808    0.03867 =
         0.10097   -0.00304   -0.01255   -0.02268
AFIX 137
H17A  2    0.780559    0.603735    0.564044    21.00000   -1.50000
H17B  2    0.888847    0.627268    0.523275    21.00000   -1.50000
H17C  2    0.867810    0.553669    0.558652    21.00000   -1.50000
AFIX   0
PART 2 -21
C15A  1    0.889649    0.558010    0.142065   -21.00000    0.03321    0.05333 =
         0.06993   -0.00307    0.00626   -0.00605
AFIX 137
H15D  2    0.910723    0.514675    0.169565   -21.00000   -1.50000
H15E  2    0.946650    0.585448    0.129156   -21.00000   -1.50000
H15F  2    0.852551    0.558159    0.028227   -21.00000   -1.50000
AFIX   0
C16A  1    0.786053    0.649466    0.254782   -21.00000    0.03400    0.03788 =
         0.06717    0.00865    0.01111   -0.00585
AFIX 137
H16D  2    0.754626    0.649064    0.135097   -21.00000   -1.50000
H16E  2    0.839935    0.679805    0.253759   -21.00000   -1.50000
H16F  2    0.738732    0.661974    0.347704   -21.00000   -1.50000
AFIX   0
C17A  1    0.872776    0.583076    0.481060   -21.00000    0.03477    0.04700 =
         0.08422   -0.00235   -0.01388   -0.00071
AFIX 137
H17D  2    0.823251    0.587534    0.575982   -21.00000   -1.50000
H17E  2    0.918327    0.618678    0.488344   -21.00000   -1.50000
H17F  2    0.908028    0.543184    0.498681   -21.00000   -1.50000
PART 0

AFIX   0
HKLF 4

REM  glo8705.res in P2(1)2(1)2
REM R1 =  0.0521 for    2805 Fo > 4sig(Fo)  and  0.0789 for all    3762 data
REM    275 parameters refined using     77 restraints

END

WGHT      0.0000      0.2318

REM Highest difference peak  0.212,  deepest hole -0.217,  1-sigma level  0.053
Q1    1   0.6932  0.4397  0.4958  11.00000  0.05    0.21
Q2    1   0.6984  0.4185  0.2260  11.00000  0.05    0.20
Q3    1   0.6188  0.4513  0.1329  11.00000  0.05    0.19
Q4    1   0.6957  0.4780  0.1535  11.00000  0.05    0.19
Q5    1   0.3820  0.2074  0.1874  11.00000  0.05    0.19
Q6    1   0.4786  0.1835  0.3098  11.00000  0.05    0.19
Q7    1   0.4275  0.3590  0.7716  11.00000  0.05    0.18
Q8    1   0.6681  0.3825  0.2737  11.00000  0.05    0.18
Q9    1   0.2856  0.0262  0.3994  11.00000  0.05    0.18
Q10   1   0.6103  0.3642  0.2835  11.00000  0.05    0.18
;
_shelx_res_checksum                     26091

_shelx_hkl_file                         
;
   0   0   1 2324.47  389.46
   0   0   1 2251.67  389.66
   0   0  -1 2384.66  389.76
   0   0   2 5550.74  944.51
   0   0   2 5749.02  945.01
   0   0  -3   93.99   17.80
   0   0   3  109.59   23.60
   0   0   4  151.48   32.40
   0   0   5   57.09   14.20
   0   0   5   69.29   14.70
   0   0  -5   73.79   15.10
   0   0  -5   66.49   15.20
   0   0  -5   63.29   15.60
   0   0  -5   37.00   14.00
   0   0  -6   24.60   11.90
   0   0  -6   42.70   13.00
   0   0  -6   12.70   10.60
   0   0  -6    3.30   11.40
   0   0   6   29.00   11.20
   0   0   6   32.00   11.80
   0   0   7   27.00   12.40
   0   0  -7   37.40   12.80
   0   0  -8    1.20    8.90
   1   0  -1   21.30    7.20
  -1   0   1   20.80    5.60
  -1   0  -1   21.60    8.00
   1   0  -1   18.10    5.30
   1   0   1   30.60    7.10
   1   0   2  393.56   64.19
   1   0  -2  378.06   62.89
   1   0   2  360.46   63.49
  -1   0   2  357.56   64.49
  -1   0   2  350.96   62.99
   1   0   3 2532.95  414.36
   1   0  -3 2416.46  411.96
   1   0  -4    3.80    6.40
   1   0   4    5.90   11.20
   1   0  -5    3.30   10.60
   1   0   5  -11.90    9.80
   1   0  -5    4.50    8.20
  -1   0  -5   -2.60    9.40
   1   0   5    4.50    7.60
  -1   0  -5   10.70    7.50
  -1   0   5    7.70    7.60
  -1   0  -5   -4.20    8.30
  -1   0   5    3.90    8.50
  -1   0  -5   12.40    9.70
   1   0  -5    3.90   10.10
   1   0  -6   -9.20   10.40
   1   0  -6   19.40   11.60
  -1   0  -6    2.90   10.90
  -1   0   6   -4.90   10.10
   1   0   6    9.30   10.60
   1   0   6   -2.60    8.90
  -1   0  -6    7.20   11.60
  -1   0  -6    9.00   10.70
  -1   0   6   11.00    9.70
  -1   0  -6   12.20    8.40
  -1   0   7    5.70   10.90
  -1   0  -7    7.10    8.40
  -1   0  -7   13.90   11.50
   1   0  -7   28.00   12.00
  -1   0  -8  103.59   18.80
   1   0  -8   82.29   18.50
   2   0   0  365.16   61.89
  -2   0   1   54.59    9.30
  -2   0  -1   43.60   10.70
   2   0   1   32.40   10.40
   2   0  -1   38.40    8.70
   2   0  -2  682.03  111.69
   2   0   2  681.53  112.99
  -2   0   2  626.04  111.69
   2   0   3  643.84  103.39
   2   0  -3  575.44   99.59
   2   0   4    8.30   13.80
   2   0  -4   31.80    8.40
   2   0  -5  -13.80    9.40
  -2   0  -5   -5.00   12.60
  -2   0   5    1.50    9.70
   2   0   5   12.10    8.50
  -2   0  -5   -7.20    7.80
  -2   0   5   -0.70    8.80
  -2   0  -5   -3.00   11.70
   2   0  -5    2.00   10.40
   2   0  -5    9.90    8.70
  -2   0  -5    7.00    8.70
   2   0   6   31.00   13.20
  -2   0   6   36.10   14.00
   2   0  -6   54.99   13.70
   2   0  -6   33.60   14.10
  -2   0   6   42.30   12.60
  -2   0  -6   47.40   14.40
  -2   0  -6   46.80   14.10
  -2   0  -6   37.70   13.20
  -2   0  -7   13.70   11.50
  -2   0   7   32.90   13.70
   2   0  -7   32.00   10.20
  -2   0  -7   19.70   10.50
  -2   0   8   63.69   13.80
   2   0  -8   62.89   13.80
  -2   0  -8   60.29   15.00
   3   0   0   -5.80    4.60
   3   0  -1 2100.99  356.86
   3   0   1 2150.38  357.36
  -3   0  -1 2141.49  357.56
   3   0  -2    7.20    3.40
  -3   0   2    1.30    4.90
   3   0   2    9.80    9.10
   3   0  -2    2.60    4.40
   3   0   2   13.70    4.50
   3   0  -3  811.72  137.79
   3   0   3  822.82  138.09
   3   0  -3  821.12  138.79
   3   0   3  838.22  140.99
   3   0   4  519.65   94.39
   3   0  -4  534.45   89.99
   3   0  -5    3.30   10.50
  -3   0  -5    0.40    8.70
   3   0   5    6.80    9.00
   3   0  -5   -7.20    7.80
   3   0  -5   -0.30    8.20
  -3   0   5    4.70   10.60
  -3   0  -5   -2.30    9.60
  -3   0  -5    3.80    8.60
  -3   0   5   16.50    9.50
  -3   0  -5    0.50    9.30
  -3   0   5    7.80    7.30
  -3   0  -6   -3.70    8.60
   3   0  -6    0.80   10.10
   3   0  -6  -12.80   10.90
  -3   0   6  -11.20    8.50
   3   0   6   -2.90   10.70
  -3   0  -6   -8.00   10.60
  -3   0   6   -4.80   11.30
  -3   0  -6    7.30   10.50
  -3   0   7   66.59   16.60
   3   0  -7   28.60   14.30
  -3   0  -7   44.80   14.50
  -3   0  -7   69.79   15.30
  -3   0  -8   26.90   12.00
  -3   0   8   33.20   12.70
   3   0  -8   76.69   12.40
   4   0   0  261.57   46.20
   4   0  -1  130.59   25.10
   4   0   1  133.99   25.80
   4   0   2    4.80   11.00
   4   0  -2    1.70    5.30
   4   0   2    6.60    4.00
   4   0  -3  388.36   64.29
   4   0   3  367.56   64.59
   4   0   3  384.56   69.49
   4   0   4  -10.90   12.10
   4   0  -4    4.10    5.70
  -4   0   4    1.70   12.70
   4   0   4  -14.70    6.20
  -4   0   5  135.89   24.70
  -4   0  -5  123.99   24.20
  -4   0  -5   95.69   23.20
  -4   0   5  115.19   23.40
   4   0  -5  107.09   23.80
  -4   0  -5  114.49   23.00
   4   0  -5  115.39   21.80
  -4   0  -5  113.49   23.40
  -4   0   5  117.79   22.80
  -4   0   6   -7.10   10.90
  -4   0   6   -8.10   12.10
  -4   0  -6  -10.40   10.10
   4   0  -6    0.70   11.10
  -4   0   6   15.70   10.70
   4   0  -6    1.10   10.10
  -4   0  -6    4.10   10.40
  -4   0  -7   10.10   10.80
  -4   0   7   11.20   13.40
   4   0  -7   18.70   12.00
  -4   0  -7   22.10   11.40
  -4   0  -8    6.40    6.00
  -4   0   8   -2.00    8.80
   4   0  -8   -2.00    5.90
  -4   0  -8   -3.50    5.00
   5   0   0   -1.40    7.50
   5   0   1   18.10    9.80
   5   0  -1   18.70    8.00
   5   0   2  254.37   47.00
   5   0   2  249.08   42.90
   5   0  -2  254.37   44.60
   5   0  -3   39.70    8.90
   5   0   3   24.30   14.40
   5   0   3   49.60    9.90
  -5   0  -4   56.49   14.90
  -5   0  -4   39.10   13.50
  -5   0  -4   55.39   14.90
  -5   0   4   43.30   14.70
  -5   0   4   63.09   10.30
   5   0   4   39.70   12.90
   5   0  -4   56.99   12.80
  -5   0   4   51.39   16.00
  -5   0  -5    1.10   10.30
   5   0  -5   10.40    9.80
  -5   0   5    2.60   12.10
  -5   0  -5    3.80    9.70
  -5   0  -5    1.10    9.40
   5   0  -5    9.50    8.00
  -5   0   5    4.80    6.80
  -5   0   5   16.30   10.20
  -5   0   6    1.40   12.90
  -5   0  -6   -3.60   10.80
   5   0  -6    3.50   11.20
  -5   0  -6   -0.90   10.20
  -5   0   6    0.70   11.70
   5   0  -6   -7.80    9.80
  -5   0  -7   69.99   17.00
  -5   0  -7   67.39   16.20
   5   0  -7   44.70   15.70
  -5   0   7   69.09   17.90
  -5   0   8    1.10    8.60
  -5   0  -8   -3.80    7.90
  -5   0  -8    0.20    7.10
   5   0  -8    9.40    5.70
   6   0   0  650.13  111.39
   6   0   1   19.70   12.30
   6   0  -1   24.50    9.60
   6   0   2   49.99   16.30
   6   0   2   36.30    8.30
   6   0  -2   34.80   12.10
   6   0   3  108.19   19.50
   6   0   3   44.90   23.10
   6   0  -3  115.89   19.00
  -6   0  -4   13.60    9.40
   6   0  -4    6.40    5.90
   6   0   4    8.70    7.70
  -6   0   4    9.30    9.60
  -6   0  -4   10.70    9.90
  -6   0   4    9.70   12.00
  -6   0  -4   -1.30    9.50
   6   0  -5    4.20    7.70
  -6   0   5   -8.80    7.50
  -6   0   5   32.30   13.90
   6   0  -5    5.20   10.50
  -6   0  -5    8.20    9.90
  -6   0   5    2.50   10.90
  -6   0  -5   24.30   11.70
  -6   0  -5   10.80   10.70
   6   0  -6   -3.70    9.80
  -6   0   6    8.10   13.20
  -6   0  -6   11.70    9.00
  -6   0   6   31.70   13.30
   6   0  -6    0.40   10.90
  -6   0  -6    9.40   10.80
  -6   0   7    1.00    9.60
  -6   0   7    4.20    8.50
   6   0  -7    2.00    7.50
  -6   0  -7   -1.40    8.40
  -6   0  -7    0.20   10.80
  -6   0  -8   20.70    9.10
   6   0  -8   42.80   10.10
  -6   0  -8   83.09   16.80
   7   0   0    4.30    9.90
   7   0   0    2.00    8.20
   7   0  -1   25.00   12.20
   7   0  -1   19.00   11.30
   7   0   1   80.69   16.90
   7   0   2   72.59   13.70
   7   0   2   65.89   19.30
  -7   0   3   51.69   15.70
  -7   0   3   69.89   11.10
  -7   0  -3   72.69   17.40
   7   0  -3   51.49   12.10
  -7   0   3   60.99   17.10
  -7   0  -3   36.70   16.40
  -7   0  -3   43.50   15.30
  -7   0  -3   57.79   13.80
   7   0   3   50.79   13.20
  -7   0  -4   -6.90    9.00
  -7   0   4   11.80   12.90
  -7   0   4   -0.90   10.10
   7   0  -4   -0.10    6.40
  -7   0  -4    1.30    8.90
   7   0   4    5.50    6.50
  -7   0  -4   12.50    8.40
  -7   0  -4  -10.20   10.20
   7   0  -5  134.69   26.40
  -7   0  -5  192.68   30.30
  -7   0   5  132.39   28.70
  -7   0  -5  151.78   28.60
  -7   0   5  141.79   24.20
  -7   0   5  105.09   29.00
  -7   0   6  118.29   22.90
   7   0  -6  157.58   23.00
  -7   0   6   93.19   16.50
  -7   0   6  114.29   23.10
  -7   0  -6  156.68   24.60
  -7   0  -6   52.29   19.60
  -7   0   7    2.60    7.80
  -7   0  -7   -5.60   10.70
  -7   0   7    2.80    8.00
   7   0  -7   -1.50    8.90
  -7   0  -7   -5.00    5.10
   8   0   0  119.89   26.90
   8   0   0  113.59   25.40
   8   0   1   11.70   12.20
   8   0  -1   -0.30    9.70
   8   0  -1    6.10   10.30
   8   0   1    2.50    2.20
   8   0   2   13.00   17.20
  -8   0  -2   22.60   11.70
   8   0   2   20.90    6.60
  -8   0   2   26.80   11.70
  -8   0  -2   26.20   10.10
  -8   0  -3   19.70   11.20
   8   0   3   12.60    7.30
  -8   0  -3   20.90    8.80
  -8   0  -3   20.00   10.00
  -8   0   3   15.90   11.20
   8   0  -3   10.10    5.00
  -8   0   3   23.20   12.40
  -8   0  -3    8.10   10.30
   8   0   4   -3.60    8.10
   8   0  -4    8.40    5.80
  -8   0  -4   12.30   10.30
  -8   0   4    6.60   11.80
  -8   0  -4   -0.90   11.00
  -8   0   4   -3.90   12.90
  -8   0  -4   -1.10   10.00
  -8   0  -4   -4.90    9.70
  -8   0  -5   27.20   14.50
  -8   0   5   10.60   13.30
   8   0  -5   15.50    8.80
  -8   0   5   56.89   15.90
  -8   0  -5   13.70   10.60
   8   0  -6    8.50   10.80
  -8   0   6   13.40   12.80
  -8   0  -6   20.00    9.90
  -8   0  -6    5.70   13.10
  -8   0   6   -7.50   12.30
  -8   0  -7   74.49   13.80
  -8   0   7   49.20   14.60
  -8   0  -7   51.09   11.60
   8   0  -7   41.20   12.70
   9   0   0  -13.00   14.90
  -9   0   0   -5.00   10.10
   9   0   1  -24.30   22.00
  -9   0  -1   15.00    9.30
  -9   0  -1   21.60   12.30
   9   0   1   21.40    5.00
  -9   0   1   33.00   12.30
  -9   0   1   16.20   10.80
  -9   0  -2  194.68   41.30
  -9   0  -2  250.97   42.40
  -9   0  -2  207.08   41.40
  -9   0   2  214.68   42.10
   9   0   2  261.97   39.70
  -9   0   3    4.50   12.00
  -9   0  -3   10.10   13.00
  -9   0  -3    0.20    9.00
  -9   0  -3    0.10   11.10
   9   0   3    1.10    6.70
   9   0  -3    1.50    4.40
  -9   0   4   17.50   13.50
  -9   0   4    8.10   13.00
   9   0  -4   11.30    6.60
  -9   0  -4    3.30   10.10
   9   0   4   11.50    7.40
  -9   0  -4   21.10   11.70
  -9   0   4    2.90    4.00
  -9   0  -4   16.50   12.80
   9   0  -5    4.00    6.90
  -9   0  -5   17.50   10.10
  -9   0   5   -6.30   12.70
  -9   0  -5   16.30   13.50
  -9   0   5   -1.50    2.70
  -9   0   5    0.40   12.70
  -9   0  -6    5.10    5.90
  -9   0   6    9.20    9.30
   9   0  -6  -15.20    8.20
  -9   0  -6    7.70   13.00
  -9   0   7   -9.10    6.10
  -9   0  -7   -1.10    9.60
 -10   0   0   32.80   14.50
 -10   0   1   79.09   22.90
 -10   0   1   80.89   23.40
 -10   0   1  114.89   18.80
  10   0   1  100.09   19.50
 -10   0  -1  129.39   25.50
 -10   0   2    1.40    2.60
 -10   0   2    1.30   12.50
 -10   0  -2    8.40   12.70
  10   0   2   13.70    6.70
 -10   0  -2   -3.90    9.70
  10   0  -3   22.10    5.90
 -10   0  -3   18.50   12.80
 -10   0   3   29.70   13.80
 -10   0  -3    9.50   13.10
  10   0   3   11.70    8.50
 -10   0  -3   10.40   10.60
  10   0   4   33.90    9.30
 -10   0  -4   13.50   14.10
 -10   0  -4   13.90   10.90
 -10   0  -4    8.00   12.10
  10   0  -4   21.30    7.50
 -10   0   4   24.90   14.90
 -10   0   5   64.59   18.10
  10   0  -5   48.60   12.20
 -10   0  -5   46.40   14.30
 -10   0  -5  102.09   17.40
 -10   0   6   26.30   10.90
 -10   0  -6   48.50   12.20
 -11   0   0    1.40   12.50
 -11   0   1  149.39   35.00
 -11   0   1  184.88   35.30
 -11   0  -1  155.48   35.40
  11   0   1  201.18   31.60
 -11   0  -2   38.00   18.20
 -11   0  -2   55.99   16.30
  11   0   2   74.59   13.00
 -11   0   2   42.20   18.10
  11   0  -3   -1.90    4.60
 -11   0  -3   13.30   14.30
 -11   0  -3   -9.60   11.50
  11   0   3   -3.60    7.60
 -11   0   3  -19.10   13.60
 -11   0   3   -5.70    3.90
 -11   0  -4    6.10   11.90
 -11   0  -4   18.30   14.00
  11   0  -4    5.90    5.50
 -11   0   4   18.40   10.60
 -11   0   5   33.10   15.00
 -11   0  -5   69.29   14.60
 -11   0  -5   32.90   13.30
 -11   0   6    9.80    9.60
 -11   0  -6    4.50   10.20
 -12   0   0   -6.90   12.80
 -12   0   1   -1.90    3.60
 -12   0  -1   -8.50   13.70
 -12   0   1    7.20   15.60
  12   0   1   11.40    5.90
 -12   0   2    2.80   14.00
 -12   0  -2   11.50   15.20
  12   0   2   10.50    7.40
  12   0   3   12.50    7.30
 -12   0   3    5.40   14.60
 -12   0  -3    7.20   13.80
  12   0  -3   12.70    5.30
 -12   0  -4  140.49   23.60
 -12   0  -4   77.39   23.30
 -12   0   5   26.30   12.70
 -12   0  -5   41.90   13.90
 -12   0  -5   40.90   11.70
 -13   0   0  -19.30   12.60
 -13   0   1   42.60   14.70
 -13   0  -1   10.80   14.60
  13   0   1   34.60    9.60
 -13   0  -2   -3.50   14.80
 -13   0   2   22.60   13.50
  13   0   2   21.80    8.00
 -13   0   3   -9.60   12.80
 -13   0   4   17.00    8.90
 -14   0   0   44.40   16.40
 -14   0  -1    3.40   13.60
 -14   0  -2   -1.50   13.80
 -14   0   3    3.40   10.90
 -14   0  -4    8.90    9.30
 -14   0   4    1.90    7.10
 -15   0   0   34.60   13.80
 -15   0  -1   -0.20   12.30
 -16   0   0   -5.50   11.40
   0   1   0   -0.50    0.80
   0  -1   0    0.40    0.70
   0  -1  -1 2827.72  464.25
   0   1   1 2578.64  464.15
   0   1  -1 2745.03  464.35
   0  -1   1 2868.01  464.35
   0  -1  -1 2865.91  464.25
   0   1   1 2768.52  464.25
   0   1   2 3605.84  584.74
   0  -1   2 3435.96  584.24
   0  -1   2 3445.66  584.94
   0   1   2 3481.45  584.94
   0   1  -3   61.59   12.90
   0   1   3   60.79   17.10
   0  -1  -3   68.59   12.90
   0  -1   3   66.39   17.70
   0  -1  -4  759.22  130.59
   0   1   4  809.62  134.29
   0   1  -5   59.69   14.00
   0   1   5   43.70   12.50
   0   1   5   46.70   12.10
   0  -1  -5   12.70   11.40
   0  -1  -5   41.30   13.40
   0  -1  -5   38.60   12.00
   0  -1  -5   46.80   11.70
   0   1  -5   58.39   13.00
   0  -1   5   44.20   11.90
   0  -1   5   35.20   12.80
   0   1  -5   41.70   10.90
   0   1  -5   42.10   14.10
   0  -1  -6    0.80   10.50
   0   1   6    6.80   10.20
   0  -1  -6   16.90    9.00
   0  -1   6   19.00   10.70
   0  -1   6   15.70   10.30
   0  -1  -6    9.40   12.00
   0   1   6   27.60   10.90
   0   1  -6   21.30   13.50
   0   1  -6   15.90   11.80
   0   1  -6   14.10   11.40
   0  -1  -6    7.00   10.90
   0   1   7    4.90   10.70
   0  -1  -7   -0.60    7.80
   0  -1  -7   14.60   11.10
   0  -1   7   11.70   10.70
   0   1  -7    2.60   10.50
   0   1  -8   16.00    9.30
   0  -1  -8   -3.60    6.20
  -1   1   0  234.08   40.10
   1   1  -1  376.56   59.29
  -1  -1  -1  380.76   60.39
  -1   1   1  341.67   59.99
  -1   1   1  343.37   60.09
   1  -1   1  341.97   60.39
   1   1  -1  356.66   60.39
   1   1   1  346.67   60.29
   1  -1  -1  364.26   60.09
  -1   1  -1  325.27   60.39
   1   1   1  356.86   60.39
   1  -1  -1  330.47   59.89
  -1  -1   1  353.26   59.29
  -1   1   2    2.40    6.00
  -1   1   2   11.70    9.50
   1  -1   2  -11.60    9.90
   1   1   2   -1.70    9.60
  -1  -1   2    2.80    4.80
   1  -1  -2   19.40    6.60
  -1   1   3  575.34  101.19
   1   1  -3  582.74   98.59
   1  -1   3  568.54  101.49
   1   1   3  583.84  101.89
  -1  -1   3  598.04   99.59
   1  -1  -3  587.94   98.49
   1  -1   4   73.49   22.60
   1   1  -4   82.99   17.00
   1   1   4  103.39   23.30
   1  -1  -4  101.89   17.70
  -1  -1  -5   31.80   12.70
  -1   1   5   29.30    9.30
   1  -1   5   25.90    9.90
  -1  -1  -5    5.30    9.30
  -1  -1  -5   18.80   15.70
   1   1  -5   28.60   10.50
   1  -1   5   29.00    9.30
  -1   1   5   22.80   12.20
  -1  -1  -5   27.10   11.50
   1   1  -5    7.70   11.30
   1   1   5   14.10    9.70
   1   1   5   11.60    8.90
  -1   1  -5   16.60   10.90
  -1   1  -5   12.10    8.20
   1  -1  -5   23.00   10.20
  -1   1  -5    8.00   12.30
  -1   1  -5   30.00   11.60
  -1  -1   5   21.10   10.50
   1  -1  -5   24.90   11.20
   1  -1  -5   25.50    8.90
  -1  -1   5   29.00   11.80
   1   1  -6   20.90   12.70
   1   1  -6   14.60   11.80
  -1  -1  -6   25.90   12.60
  -1  -1  -6   34.70   11.00
   1  -1   6   40.00   12.30
  -1  -1  -6   50.09   12.90
  -1   1   6   30.30   11.30
   1  -1   6   43.70   14.40
  -1   1   6   33.10   12.60
  -1   1  -6   25.20   12.20
  -1   1  -6   27.00   12.50
  -1  -1   6   17.30   11.70
  -1   1  -6   12.10    9.30
   1  -1  -6   27.00   12.60
   1  -1  -6   11.20    9.10
  -1  -1   6   34.10   11.50
  -1   1  -6   48.10   13.20
   1   1   6   27.80   11.10
   1  -1  -6   21.20   13.30
   1   1   6   23.80   11.40
  -1  -1  -7   51.09   14.10
   1   1  -7   62.09   14.10
  -1  -1  -7   26.30   11.10
  -1   1   7   26.70   13.50
  -1  -1   7   29.90   13.30
   1  -1  -7   59.49   14.60
   1   1   7   14.00   12.30
  -1   1  -7   46.60   13.80
   1   1  -8   12.90    6.80
  -1  -1  -8    4.80    6.80
  -1   1   8    2.90    9.00
  -1   1  -8   14.10    7.10
   1  -1  -8   14.20    7.60
   2  -1   0  142.29   24.70
  -2   1   1 2036.50  350.16
   2   1  -1 2164.28  349.67
   2  -1   1 2061.79  350.26
  -2  -1  -1 1976.70  350.46
   2   1   1 2106.29  350.46
   2  -1  -1 2104.69  349.96
  -2   1  -1 2117.49  350.46
   2  -1  -1 2138.49  350.16
   2  -1   2  489.15   80.39
   2   1  -2  482.65   78.49
   2   1  -2  469.35   78.09
  -2   1   2  424.96   79.19
   2  -1  -2  470.55   78.09
  -2  -1   2  459.95   78.49
   2   1   2  489.75   80.49
   2  -1  -2  428.06   79.09
   2   1  -3  539.55   91.59
   2  -1   3  551.64   94.89
   2  -1   3  509.85   91.69
   2  -1  -3  553.54   91.59
   2   1   3  606.24   94.99
   2  -1  -3  544.95   92.99
   2  -1   4  143.19   36.90
   2   1  -4  194.58   33.20
   2   1   4  192.08   38.50
   2  -1  -4  191.58   33.20
   2  -1   5   62.19   15.00
  -2   1   5   60.59   14.00
  -2   1   5   71.99   15.80
  -2   1   5   73.99   15.40
  -2  -1  -5   69.39   16.20
  -2  -1  -5   90.49   17.70
  -2  -1  -5   46.60   14.30
   2   1  -5   73.99   16.30
  -2  -1  -5   54.19   15.30
   2   1  -5   46.30   14.80
   2   1   5   48.60   14.70
  -2  -1   5   62.39   15.30
  -2   1  -5   48.80   13.90
   2  -1  -5   53.09   14.70
  -2   1  -5   57.79   15.40
   2  -1  -5   68.79   15.30
  -2   1  -5   49.40   15.10
  -2   1  -5   64.29   14.70
  -2  -1   5   56.29   15.10
   2  -1  -5   40.60   13.90
   2  -1  -5   89.09   16.80
   2   1   5   61.49   15.20
   2  -1   6  102.69   21.10
  -2  -1  -6  118.39   21.50
   2   1  -6  114.49   22.30
  -2  -1  -6   98.29   21.00
  -2   1   6   80.19   20.90
  -2  -1  -6   96.39   21.30
   2   1  -6  108.29   22.10
  -2   1   6  101.69   20.30
   2  -1  -6   73.29   20.80
  -2   1  -6   85.89   20.80
  -2  -1   6  100.59   21.30
   2   1   6   82.19   20.60
  -2   1  -6  131.49   21.40
   2  -1  -6  120.19   22.10
   2   1   6   87.19   21.20
  -2   1  -6  106.09   21.80
  -2  -1   6   68.59   19.50
   2  -1  -6   66.19   20.30
  -2  -1  -7   26.40   10.20
  -2  -1  -7    4.40   10.50
  -2   1   7    2.40    8.80
   2   1  -7   10.90   11.10
  -2   1  -7   24.50   15.20
  -2  -1   7    6.50   11.80
  -2   1  -7   -1.90   10.50
   2  -1  -7   20.20   11.80
  -2   1   8   12.40   10.00
  -2  -1  -8   30.20    8.70
  -2  -1  -8   42.20   14.70
   2   1  -8   10.50    9.70
  -2  -1   8   25.50    9.80
   2  -1  -8   24.80    8.00
  -2   1  -8    6.10    9.30
   3   1   0  861.01  146.79
   3  -1   0  875.11  146.19
   3  -1   1  641.04  100.69
   3   1  -1  587.94   99.99
   3   1   1  588.24  100.79
   3  -1  -1  585.84  100.49
  -3   1  -1  556.14  100.59
   3   1  -2  355.06   58.39
   3   1  -2  354.26   57.69
  -3   1   2  304.97   59.59
   3  -1   2  342.77   57.99
   3  -1   2  342.17   60.59
   3   1   2  329.37   57.99
   3  -1  -2  331.67   59.39
   3   1   2  380.16   60.89
   3  -1  -2  343.17   57.79
   3   1  -3  636.24  107.19
   3  -1   3  625.54  107.39
   3  -1   3  694.23  110.89
   3  -1  -3  632.14  107.29
   3   1   3  626.94  107.49
   3  -1  -3  633.44  108.59
   3   1   3  667.33  110.79
   3   1  -4  196.18   35.00
   3  -1   4  210.68   40.50
   3  -1  -4  187.88   35.00
   3   1   4  239.18   42.50
   3   1  -5   83.39   14.40
   3   1  -5   56.39   14.50
  -3  -1  -5   61.49   14.90
  -3   1   5   62.89   15.70
  -3   1   5   50.09   14.20
   3  -1   5   52.89   14.60
  -3  -1  -5   60.59   15.80
  -3  -1  -5   63.19   16.30
  -3  -1  -5   50.49   15.50
   3   1  -5   58.89   17.10
  -3   1   5   42.90   12.80
  -3  -1   5   48.60   15.50
  -3  -1   5   50.09   13.00
   3  -1  -5   59.09   12.90
  -3   1  -5   72.99   14.80
  -3   1  -5   45.50   14.80
  -3  -1   5   46.70   13.70
   3   1   5   60.09   16.30
   3  -1  -5   42.40   14.80
  -3   1  -5   61.69   15.00
  -3   1  -5   62.99   15.50
   3   1  -6  120.79   24.10
   3  -1   6  118.89   23.80
   3   1  -6  146.39   25.50
  -3   1   6   82.59   21.90
  -3  -1  -6  144.49   24.10
  -3   1   6   98.49   24.10
  -3  -1  -6   98.29   22.90
  -3  -1  -6  137.09   24.40
   3  -1  -6  113.99   24.00
  -3  -1   6  124.89   22.70
  -3   1  -6  117.99   23.00
   3  -1  -6   91.99   23.70
  -3   1  -6  112.49   23.60
  -3   1  -6   85.99   23.00
   3   1   6  111.39   23.60
  -3  -1   6  112.49   24.40
  -3  -1  -7   47.10   12.00
  -3  -1  -7   15.60    8.70
  -3   1   7   15.10    9.50
   3   1  -7   12.60   11.80
  -3  -1   7  -16.50   11.30
  -3   1  -7    2.30   10.50
   3  -1  -7    4.70   11.50
  -3   1  -7   24.60   10.30
  -3  -1  -8   49.99   10.70
  -3  -1  -8   43.70   11.60
   3   1  -8   50.49   11.90
  -3   1   8   39.00   10.40
  -3  -1   8   19.10   11.40
  -3   1  -8   20.50    9.30
   3  -1  -8   57.69   11.20
   4  -1   0 9926.81 1665.33
   4   1   0 9999.00 1665.73
   4  -1   1  161.88   28.70
   4   1  -1  139.59   27.00
   4  -1  -1  143.99   27.60
   4   1   1  152.58   29.20
   4   1  -2  570.84   96.79
   4   1  -2  554.74   95.69
   4  -1   2  570.84   98.59
   4  -1   2  609.44   96.09
   4   1   2  593.54   99.19
   4  -1  -2  538.55   95.69
   4  -1  -2  597.74   97.69
   4   1   2  578.94   96.09
   4   1  -3   83.09   14.70
   4  -1   3   77.19   20.20
   4  -1   3   75.99   15.40
   4   1   3   64.89   19.90
   4  -1  -3   84.19   14.90
   4   1   3   74.99   15.30
   4  -1  -3   71.79   17.60
  -4  -1  -4  285.97   42.60
   4   1  -4  213.98   39.10
  -4   1   4  302.87   45.30
   4  -1   4  228.28   39.60
   4  -1   4  137.79   42.70
  -4  -1   4  234.28   43.70
  -4   1  -4  199.38   42.60
   4  -1  -4  213.98   39.10
   4   1  -5   71.39   18.00
  -4  -1  -5   72.09   17.20
   4   1  -5   53.09   17.70
   4   1  -5   75.49   15.40
  -4   1   5   93.49   17.00
  -4   1   5   82.19   17.50
  -4  -1  -5   79.99   17.00
  -4   1   5   79.49   18.70
  -4  -1  -5   65.29   16.90
  -4  -1  -5   94.19   19.30
   4  -1  -5   77.59   16.30
  -4   1  -5   66.69   16.90
  -4  -1   5   72.19   16.40
  -4   1  -5   35.80   17.90
  -4  -1   5   75.39   17.40
  -4   1  -5   88.69   18.10
  -4   1  -5   55.89   17.00
   4  -1  -5   70.99   17.90
  -4  -1   5   89.39   18.80
   4  -1   6   19.10   12.00
   4   1  -6   22.40   11.50
   4   1  -6    6.40   11.30
  -4  -1  -6    7.10   10.00
  -4   1   6    7.40   12.60
  -4   1   6   13.50    9.30
  -4  -1  -6   -5.50   10.60
  -4   1  -6    7.10   11.70
  -4  -1   6    8.60    9.10
  -4  -1   6    1.50   12.50
  -4   1  -6   11.00   10.40
  -4   1  -6    3.30   10.80
   4  -1  -6   20.60   11.30
   4  -1  -6   13.50   12.50
  -4  -1  -7   14.00    8.90
   4   1  -7   24.30   12.00
  -4   1   7    9.80   12.50
  -4  -1  -7   11.50   10.60
  -4   1  -7   21.80    8.80
   4  -1  -7   16.70    9.40
  -4  -1   7   35.80   13.70
  -4   1  -7    8.40   10.80
  -4  -1  -8   31.30    9.70
  -4   1   8   26.50    9.00
  -4  -1  -8   46.90   11.20
   4   1  -8   27.70   10.10
   4  -1  -8   35.10    9.20
  -4  -1   8   26.00    8.70
  -4   1  -8   13.20    9.20
   5   1   0 1883.21  321.77
   5  -1   0 1906.21  321.27
   5  -1   0 1952.50  322.07
   5  -1   1  166.78   32.90
   5   1  -1  170.28   32.30
   5  -1  -1  175.98   32.70
   5   1   1  172.08   33.10
   5  -1   2   38.30    9.70
   5  -1   2   56.29   14.90
   5   1  -2   59.99   11.80
   5   1   2   36.40   16.30
   5   1   2   49.99    9.60
   5  -1  -2   48.90   13.20
   5   1  -3  248.18   41.70
   5  -1   3  232.48   42.20
   5  -1   3  218.28   47.10
   5   1   3  246.98   47.10
   5  -1  -3  265.07   41.80
   5   1   3  225.68   42.10
   5   1  -4  129.89   23.30
  -5   1   4  130.09   26.20
  -5  -1  -4  120.49   24.30
  -5   1   4  136.19   21.70
   5  -1   4  135.39   24.30
  -5   1   4  125.39   24.70
  -5   1   4  103.39   24.10
  -5  -1  -4  138.99   25.20
  -5  -1  -4  121.29   24.70
  -5   1  -4  149.79   25.60
  -5   1  -4  109.39   24.20
  -5   1  -4  148.69   25.80
  -5  -1   4   97.89   24.00
  -5  -1   4  156.28   27.60
   5   1   4   96.79   23.50
   5  -1  -4  119.09   23.40
  -5  -1   4  121.89   25.00
  -5   1   5   33.00   14.40
   5   1  -5   51.09   12.30
  -5  -1  -5   54.99   13.10
  -5   1   5   37.20   12.60
  -5  -1  -5   37.30   11.80
  -5  -1  -5   45.20   12.20
   5   1  -5   18.60    9.70
  -5   1   5    6.60    8.60
  -5   1  -5   13.20   11.60
  -5   1  -5   18.30   11.50
  -5   1  -5   38.60   12.10
   5  -1  -5   45.50   12.70
  -5  -1   5   22.40   11.80
   5  -1  -5   31.60   10.40
  -5  -1   5   29.20    9.00
  -5  -1   5   22.20   14.00
  -5  -1  -6  -27.60   10.30
  -5   1   6   23.70   13.60
   5   1  -6   -3.50   10.40
  -5   1   6    7.90   11.90
   5   1  -6  -15.70    9.80
  -5  -1  -6   -6.30    9.30
  -5   1  -6   12.80   11.30
   5  -1  -6    8.90   10.70
  -5  -1   6    8.50   11.40
   5  -1  -6   -1.20   11.60
  -5  -1   6    5.00   13.20
  -5   1  -6    4.10   10.80
   5   1  -7   22.80    9.40
  -5  -1  -7   31.10   12.80
  -5  -1  -7   23.00   11.30
  -5   1   7   20.60   14.10
  -5   1  -7   34.40   12.70
   5  -1  -7   29.70   12.90
  -5   1  -7    8.80   11.20
  -5  -1   7   39.70   14.50
  -5  -1  -8   10.50    6.40
  -5   1   8    7.50    6.60
   5   1  -8   -0.10    7.40
  -5  -1  -8    0.30    5.00
   5  -1  -8   17.10    6.20
  -5   1  -8   -1.50    5.10
   6  -1   0  281.67   46.40
   6  -1   0  238.08   44.10
   6   1   0  217.78   44.60
   6  -1   1  116.29   24.10
   6   1  -1  107.89   22.90
   6   1   1  101.69   24.20
   6  -1  -1  115.29   23.40
   6  -1  -1   99.39   21.50
   6  -1   2  256.87   43.10
   6  -1   2  282.67   48.60
   6  -1  -2  242.98   46.50
   6   1   2  245.28   43.10
   6   1   2  241.38   47.70
   6  -1   3  230.98   42.50
   6  -1   3  210.98   47.80
   6   1  -3  245.08   41.80
   6   1   3  200.88   46.70
   6   1   3  242.18   42.50
   6  -1  -3  272.67   42.00
   6  -1   4   49.80   11.40
  -6  -1  -4   35.00   11.90
  -6   1   4   43.90   11.40
  -6  -1  -4   43.70   12.70
  -6  -1  -4   21.40   10.90
   6   1  -4   36.40    9.50
  -6   1   4   46.20   14.70
  -6   1  -4   54.99   13.60
  -6   1  -4   48.10   13.30
  -6  -1   4   28.30   14.10
   6   1   4   32.60   11.00
  -6  -1   4   44.80   13.10
  -6   1  -4   41.00   13.60
   6  -1  -4   33.40   10.30
  -6   1  -4   58.59   13.60
  -6  -1  -5   99.59   18.50
  -6   1   5   87.49   17.40
  -6  -1  -5   93.89   17.80
  -6  -1  -5  117.99   19.90
  -6   1   5  107.49   20.80
   6   1  -5  100.19   18.50
  -6   1   5   63.09   15.80
   6   1  -5   76.89   16.20
  -6   1   5   64.99   13.10
   6  -1  -5  101.09   18.30
  -6  -1   5  110.69   19.80
  -6   1  -5  119.09   20.20
  -6   1  -5  104.39   18.20
  -6   1  -5  120.89   19.60
  -6  -1   5   68.19   19.80
   6  -1  -5   92.89   16.80
  -6  -1  -6   17.60   10.70
   6   1  -6    3.30   12.10
   6   1  -6    0.40   10.50
  -6  -1  -6   20.80   12.30
  -6   1   6   20.30   14.30
  -6   1   6   31.30   14.20
  -6  -1   6   11.60   13.30
   6  -1  -6    8.00    8.80
  -6   1  -6    7.90   10.30
  -6   1  -6   23.80   13.00
  -6  -1   6   13.20   13.40
   6  -1  -6    4.30   12.10
  -6   1   7   10.70   12.20
  -6  -1  -7   23.20    9.70
  -6  -1  -7   33.30   10.10
  -6   1   7   14.30    9.30
   6   1  -7   13.40   10.30
  -6   1  -7   18.90    9.60
  -6   1  -7   11.90    9.90
   6  -1  -7    3.50   11.20
  -6  -1   7    4.00   11.80
  -6  -1  -8    5.50    6.60
   6   1  -8   18.40    8.10
  -6  -1  -8   14.00    6.70
   6  -1  -8   15.80    6.40
  -6   1  -8   33.60    6.90
   7  -1   0 1777.62  314.77
   7   1   0 1848.42  314.47
   7  -1   0 1952.80  314.17
   7   1  -1  200.98   44.70
   7   1  -1  226.48   45.60
   7  -1   1  282.07   47.10
   7  -1  -1  248.08   45.70
   7  -1  -1  280.87   45.80
   7   1   1  236.68   45.90
   7  -1   2   23.70    5.80
   7  -1   2   20.20   14.20
   7   1   2   19.20    6.20
   7  -1  -2    5.50   12.20
   7   1   2    2.30   14.50
  -7  -1  -3   21.20    9.90
   7  -1   3   28.20    7.90
   7   1  -3   16.50    5.70
  -7  -1  -3   22.90   10.20
  -7   1   3   39.10   11.40
  -7  -1  -3    9.00    9.10
  -7   1   3   24.00   12.20
  -7   1  -3   21.30   10.50
  -7   1  -3   18.80   10.50
   7  -1  -3   21.90    6.10
  -7  -1   3   18.50   12.40
   7   1   3   21.90    7.40
  -7   1  -3   13.70   10.30
  -7   1  -3   11.10    9.30
  -7  -1   3   24.20   10.90
  -7  -1  -4    1.80    9.20
   7  -1   4   -0.60    7.70
  -7   1   4  -19.30   11.50
   7   1  -4  -10.50    6.10
  -7  -1  -4  -19.50   10.50
  -7  -1  -4    3.60    9.80
  -7  -1  -4   -1.30    7.80
  -7   1   4    5.90    7.60
  -7  -1   4   -2.30   12.20
  -7   1  -4    7.90   10.90
   7  -1  -4   -3.00    5.80
  -7   1  -4   -8.10    9.30
  -7   1  -4   -4.10    9.20
   7   1   4    2.70    7.80
  -7  -1   4    5.30   10.60
  -7   1  -4   -3.80    8.00
  -7   1   5   56.89    9.30
  -7  -1  -5   35.30   14.00
  -7   1   5   48.60   17.40
  -7  -1  -5   40.80   16.00
   7   1  -5   36.30   12.40
  -7   1   5   52.59   16.90
  -7  -1   5   44.10   17.30
   7  -1  -5   39.20   12.50
  -7  -1   5   38.70   15.40
  -7   1  -5   43.20   14.70
  -7   1  -5   41.10   16.40
  -7   1  -5   30.90   14.20
  -7   1   6    4.30   13.60
   7   1  -6   20.40   11.90
  -7  -1  -6   34.20   11.10
  -7  -1  -6   21.40   11.00
  -7   1   6   16.90   14.00
  -7   1  -6   31.10   14.20
  -7   1  -6   32.00   12.20
   7  -1  -6   20.20   10.70
   7  -1  -6    8.80   12.00
  -7  -1   6   27.20   14.40
  -7  -1   6   10.30   13.90
   7   1  -7   18.80    7.70
  -7  -1  -7   40.10   10.20
  -7  -1  -7   12.60    6.60
  -7   1   7   13.40    9.30
  -7   1   7    7.20   11.90
  -7  -1   7    4.00   11.20
   7  -1  -7   15.30    8.10
  -7   1  -7   50.79   10.70
  -7   1  -7   22.40    9.90
   8  -1   0  167.18   34.50
   8  -1   0  158.28   32.00
   8   1   0  176.28   34.30
   8   1   0  148.19   32.60
   8   1  -1    6.10   10.90
   8   1  -1   18.40   11.20
   8  -1   1   11.10    3.40
   8  -1   1    7.80   11.40
   8  -1   1    2.70   13.00
   8   1   1    3.70   12.50
   8  -1  -1    6.40   12.70
   8  -1   2    0.50    5.00
  -8  -1  -2    5.30    9.90
  -8  -1  -2   -3.90   11.30
   8  -1   2   -3.70   13.00
  -8   1   2    8.80   10.20
  -8  -1   2   16.50   10.40
  -8   1  -2   12.10    8.80
   8   1   2    1.90    4.90
  -8   1  -2    4.60    9.80
   8   1  -3   96.79   19.50
  -8   1   3  115.49   18.80
  -8  -1  -3   82.49   22.00
   8  -1   3   98.19   20.60
  -8   1   3   97.49   23.00
  -8   1   3  134.29   25.60
  -8  -1  -3   94.59   22.90
  -8  -1  -3   82.99   20.80
  -8  -1  -3  110.39   23.40
  -8  -1   3   94.99   23.60
  -8   1  -3  105.59   22.80
  -8   1  -3  108.69   20.60
   8   1   3   92.69   20.60
   8  -1  -3  103.19   19.70
  -8   1  -3  115.99   23.80
  -8  -1   3  115.69   18.80
  -8   1  -3  124.79   24.10
  -8  -1   3  106.89   23.30
  -8   1   4  164.28   29.00
   8   1  -4  137.49   24.80
  -8  -1  -4  164.48   26.90
  -8   1   4  124.79   23.40
   8  -1   4  153.38   26.20
  -8   1   4  142.99   28.30
  -8  -1  -4  166.48   27.90
  -8  -1  -4  135.79   27.80
  -8  -1  -4  129.29   27.50
   8  -1  -4  156.88   25.50
  -8  -1   4  136.99   28.00
  -8  -1   4  129.49   23.40
  -8   1  -4  174.68   28.80
  -8  -1   4  171.88   29.20
  -8   1  -4  141.49   27.80
  -8   1  -4  139.19   25.80
   8   1   4  139.89   25.50
  -8   1  -4  126.29   26.90
   8   1  -5   15.40    7.00
  -8   1   5   16.10   12.70
  -8  -1  -5    1.10    9.30
   8  -1   5    5.20   10.30
  -8   1   5   33.00   14.60
  -8  -1  -5   26.60   14.20
  -8  -1   5   -2.90   13.00
  -8   1  -5   20.80   10.60
  -8   1  -5   12.80   11.10
   8  -1  -5    2.30    6.60
  -8  -1   5   28.90   13.70
   8   1  -6   56.29   14.00
  -8  -1  -6   34.90   16.40
  -8  -1  -6   63.89   13.90
  -8   1   6   42.70   13.70
  -8   1   6   13.10   15.50
   8   1  -6   62.69   13.20
   8  -1  -6   53.69   13.00
  -8   1  -6   22.20   12.80
  -8   1  -6   79.09   18.20
  -8  -1   6   62.79   14.60
  -8  -1   6   48.70   16.10
  -8   1   7    1.10   10.50
  -8  -1  -7   13.60   11.10
  -8  -1  -7    2.20    4.60
   8   1  -7   -3.10    9.30
  -8   1  -7    4.90    5.50
  -8  -1   7    8.90   10.20
   8  -1  -7   25.90    9.10
  -8   1  -7   10.80   10.30
   9   1   0    5.20   15.30
  -9  -1   0   51.29   16.40
  -9   1   0   44.90   13.90
   9   1   0   53.29   18.90
  -9  -1  -1   45.20   11.50
  -9   1   1   29.30   15.00
   9  -1   1   44.80    8.30
  -9   1   1   48.00   14.00
  -9  -1  -1   34.20   13.70
  -9   1  -1   35.90   13.70
  -9  -1   1   34.60   13.60
  -9   1  -1   28.90   11.50
   9   1   1   38.60    7.70
  -9  -1   1   58.99   14.00
  -9   1  -1   31.80   13.80
   9  -1   2   13.90    6.60
  -9  -1  -2   15.50   11.20
  -9   1   2   21.00   12.20
  -9  -1  -2   27.40   12.10
  -9   1  -2    9.20   11.30
   9   1   2   10.00    6.10
  -9   1  -2   27.10   10.80
  -9  -1   2   12.20   11.90
  -9   1  -2   11.60    9.80
  -9   1   3  145.79   31.30
  -9  -1  -3  166.08   31.40
   9  -1   3  168.38   29.40
  -9   1   3  163.38   31.90
  -9  -1  -3  194.68   33.80
   9   1  -3  143.79   27.90
   9   1   3  185.88   29.50
  -9   1  -3  135.49   30.90
  -9  -1   3  176.98   32.10
  -9   1  -3  146.79   31.90
   9  -1  -3  157.68   28.00
  -9   1  -3  172.48   31.20
  -9  -1  -4   13.30   11.00
  -9  -1  -4    8.70   12.10
  -9   1   4    5.80   13.00
  -9   1   4   -1.90   13.10
  -9   1   4    1.20    3.80
   9  -1   4    5.60    7.60
   9   1  -4   10.10    5.80
  -9  -1  -4   19.60   10.80
   9  -1  -4   13.30    6.10
   9   1   4   12.10    9.10
  -9   1  -4   31.70   13.90
  -9  -1   4    2.30    4.00
  -9  -1   4   -0.20   12.70
  -9   1  -4   31.40   10.30
  -9   1  -4   21.60   11.40
  -9   1  -4   -3.90   10.20
  -9  -1  -5   71.89   14.50
   9  -1   5   35.20   11.40
  -9   1   5    5.60   14.30
  -9  -1  -5   26.10   11.80
  -9   1   5   26.60   15.10
   9   1  -5   47.60   10.80
  -9   1  -5   22.30   15.30
  -9   1  -5   45.40   13.10
  -9  -1   5   50.79   13.50
   9  -1  -5   38.10   10.50
  -9   1   6   49.00   16.20
  -9  -1  -6   71.19   17.60
  -9  -1  -6   43.70   13.20
  -9   1  -6   46.70   16.70
  -9  -1   6   47.10   16.90
  -9   1  -6   81.19   14.80
   9  -1  -6   41.40   12.20
  -9   1   7   19.40   10.20
  -9  -1  -7   13.30   10.30
  -9  -1   7   21.90    7.70
   9  -1  -7   16.60    7.40
  -9   1  -7   22.90    8.20
  -9   1  -7   14.10    7.20
 -10   1   0    8.70   11.90
 -10  -1   0    2.80   12.10
  10  -1   1    1.00    4.10
 -10   1   1    2.00   11.00
 -10  -1  -1    9.10    8.40
 -10  -1  -1    2.40   12.30
 -10   1   1    3.90   14.00
 -10  -1   1   18.00   12.40
 -10   1  -1   -7.30   11.40
  10   1   1   -0.20    4.20
 -10  -1   1    2.00   11.40
 -10   1  -1   -8.70    8.60
 -10  -1  -2   70.09   19.30
 -10   1   2  104.89   22.10
 -10  -1  -2  107.69   22.60
  10  -1   2   94.39   17.30
 -10   1  -2   70.09   21.20
 -10  -1   2   78.59   21.20
 -10   1  -2   81.09   19.80
 -10   1  -2   92.69   20.90
  10   1   2   90.59   17.00
 -10  -1  -3   30.70   14.90
  10   1  -3   45.60    8.70
  10  -1   3   37.50   11.20
 -10   1   3   11.00   15.00
 -10  -1  -3   24.20   14.00
  10   1   3   39.00   11.10
 -10   1  -3   49.99   15.80
 -10  -1   3   50.19   16.10
  10  -1  -3   41.00    8.90
 -10   1  -3   37.10   12.80
 -10   1  -3   48.70   15.50
  10  -1   4  113.89   24.30
 -10  -1  -4  145.39   27.70
 -10   1   4   94.19   26.80
 -10  -1  -4  134.79   27.30
  10   1  -4  137.69   23.60
  10   1   4  183.28   25.90
 -10  -1   4  105.59   27.30
  10  -1  -4  125.49   23.60
 -10   1  -4   86.79   26.30
 -10   1  -4  137.19   26.70
 -10   1  -4  187.78   29.40
  10   1  -5  -10.10    6.50
 -10  -1  -5   12.60    9.90
 -10   1   5  -11.00   13.20
 -10   1  -5    6.70    9.70
  10  -1  -5    4.30    5.50
 -10  -1   5   -1.00    9.10
 -10   1  -5    8.70   14.10
 -10   1  -5   -6.80    8.50
 -10  -1   5   -6.30    3.90
 -10  -1  -6   10.80    8.80
 -10   1   6   20.00   12.10
  10  -1  -6    5.40    8.10
 -10   1  -6   19.40   12.30
 -10  -1   6   -4.20   11.00
 -10   1  -6    1.20    7.10
 -11  -1   0  266.57   49.50
 -11   1   0  270.37   49.60
 -11   1   1   16.20   12.80
  11  -1   1   17.00    6.70
 -11   1   1    9.50   22.70
 -11  -1  -1    3.80   13.90
 -11  -1   1   16.70   13.80
  11   1   1   19.40    6.60
 -11   1  -1   11.50   14.10
 -11  -1   1   36.20   13.80
 -11   1   2  213.48   36.30
 -11  -1  -2  152.38   37.30
 -11  -1  -2  148.79   35.40
  11  -1   2  220.58   34.20
 -11   1  -2  140.99   34.80
  11   1   2  237.68   34.10
 -11  -1   2  250.07   38.50
 -11   1  -2  165.98   37.20
  11   1  -3   58.39   11.00
 -11  -1  -3   79.19   19.40
 -11   1   3   33.10   17.90
 -11  -1  -3   63.09   17.00
  11  -1   3   89.69   14.40
  11   1   3   55.29   13.80
 -11   1  -3   63.79   15.70
  11  -1  -3   52.09   11.20
 -11  -1   3   26.30   17.20
 -11   1  -3   35.80   17.40
 -11   1  -3   45.90   14.30
  11   1  -4    9.70    5.90
 -11   1   4   -1.10    3.00
 -11   1   4    1.50   13.00
 -11  -1  -4    2.50   13.70
  11  -1   4    3.10    7.60
 -11  -1  -4   11.30   11.70
 -11  -1   4   15.50   13.40
 -11   1  -4   -1.70    8.80
 -11   1  -4    7.20    9.50
  11  -1  -4    3.80    5.50
 -11   1  -4    5.30   13.70
 -11  -1  -5   50.39   12.60
 -11   1   5   39.80   14.90
 -11   1  -5   29.40   12.20
 -11   1  -5   30.50   12.10
 -11   1  -5   29.10   10.90
 -11  -1   5   27.00   13.90
 -11   1   6   -1.10    7.00
 -11  -1  -6   16.40   11.20
 -11  -1   6    1.40    6.80
 -11   1  -6    8.30   10.30
 -12  -1   0   12.40   14.10
 -12   1   0    7.60   13.90
 -12   1   1   32.20   16.00
 -12  -1  -1   47.80   18.10
  12  -1   1   76.49   11.30
 -12  -1   1   38.90   16.60
 -12   1  -1   15.80   16.60
 -12  -1   1   29.40   16.10
  12   1   1   53.19   11.00
  12  -1   2   46.40   11.30
 -12   1   2   34.60   16.30
 -12  -1  -2   48.70   18.10
  12   1   2   37.00   11.10
 -12  -1   2   41.50   13.50
 -12   1  -2   36.40   17.60
 -12   1   3   72.79   19.20
 -12  -1  -3   49.70   16.40
  12  -1   3   79.49   15.00
  12   1  -3   53.29   11.70
 -12   1  -3   30.90   18.10
  12  -1  -3   49.80   11.60
  12   1   3   74.39   14.40
 -12  -1   3   91.99   19.50
 -12  -1  -4   38.60   12.40
 -12  -1  -4   42.10   11.90
 -12   1   4   26.90   15.10
 -12   1  -4   45.90   15.90
 -12   1  -4   18.10   11.00
 -12  -1  -5   67.19   15.70
 -12   1   5   49.70   12.70
 -12   1  -5   36.80   12.50
 -12  -1   5   48.00   12.30
 -13   1   0  132.49   26.80
 -13  -1   0  102.69   26.10
  13  -1   1   16.40    6.90
 -13  -1  -1   -1.00   13.90
  13   1   1   11.50    7.20
 -13  -1   1    8.90   12.30
 -13   1  -1   -3.30   13.90
 -13  -1  -2   21.20   11.50
 -13   1   2    6.60   12.80
  13  -1   2   10.90    7.60
 -13  -1   2   -1.60    2.90
  13   1   2    2.30    7.10
 -13   1  -2   -5.70   13.70
 -13  -1   2   31.80   10.20
 -13   1   3   16.80   15.60
  13  -1   3   42.30   12.40
 -13  -1  -3   52.09   14.10
 -13  -1   3   53.19   14.30
 -13   1  -3   53.29   15.10
 -13   1   4    6.40   12.40
 -13  -1  -4   20.10   11.70
 -13   1  -4    7.30   11.60
 -13  -1   4   34.80   10.20
 -13   1   5   -3.50    9.40
 -14   1   0   -0.10   12.10
 -14  -1   0    2.40   12.50
 -14  -1  -1   -1.50    9.60
 -14   1  -1   -0.50   14.40
 -14  -1   1   -4.40   13.80
 -14  -1   2   13.80   10.90
 -14   1   3   10.60   11.10
 -14  -1   3   25.80    9.40
 -14   1   4   10.40   10.60
 -14  -1  -4   28.20    8.30
 -14   1  -4    8.70    9.90
 -14  -1   4   21.90    8.40
 -15   1   0   25.80   13.00
 -15  -1   0    6.10   12.00
 -15  -1  -1   26.20   10.60
 -15   1  -1   18.90   14.60
 -15   1  -2   15.60    9.90
 -16  -1   0    4.20   10.40
 -16  -1  -1  -17.30    9.70
 -16   1  -1   -1.30    6.90
   0  -2   0   -0.10    2.30
   0   2   0   20.40    3.40
   0   2  -1   89.39   16.00
   0   2   1   84.09   15.50
   0   2   1   77.49   15.80
   0  -2  -1   81.79   15.60
   0  -2  -1   72.19   15.30
   0  -2   2   22.10    9.60
   0   2   2    1.40    7.30
   0  -2   2    8.50    5.30
   0  -2  -2   -1.10    7.30
   0  -2  -3  278.27   49.10
   0  -2   3  282.57   49.99
   0   2   3  316.87   52.29
   0  -2   3  289.27   52.89
   0   2   4   74.59   24.00
   0   2  -4  119.79   20.50
   0   2  -5   11.30   11.60
   0  -2  -5    8.30   10.40
   0  -2  -5   22.70   13.20
   0   2  -5    6.10   10.50
   0   2  -5   -8.80   10.50
   0   2   5   24.50    8.90
   0  -2   5    1.60    8.20
   0   2   5   18.00    9.40
   0  -2   5    4.80    9.80
   0  -2  -5   -3.70    8.40
   0  -2  -5    0.40    8.80
   0   2   6   -7.70    9.40
   0   2  -6   19.60   11.70
   0  -2  -6   18.50   10.60
   0  -2  -6    2.70   10.90
   0   2   6   17.70   10.10
   0   2  -6    5.60   10.80
   0   2  -6   -2.50   10.40
   0  -2  -6   -6.90   10.50
   0  -2   6    2.30   12.00
   0  -2   6   -4.10    9.40
   0  -2  -6   -3.80   10.30
   0   2   7   -1.80   10.90
   0  -2  -7    0.00    5.90
   0  -2   7    6.70   10.80
   0  -2  -7    0.80   10.70
   0   2  -7    3.40   10.00
   0   2   8   15.80    9.80
   0  -2  -8    9.10    7.30
   0   2  -8   14.90    7.20
   1  -2   0 1651.03  275.77
  -1   2   0 1631.34  275.77
   1  -2   0 1648.24  276.37
  -1   2   0 1656.03  276.47
   1   2   0 1668.33  276.17
  -1   2   1   92.39   17.70
   1  -2   1  110.29   18.30
  -1  -2  -1   84.19   17.90
  -1   2   1   88.39   16.80
   1  -2  -1   94.09   17.60
   1  -2  -1   85.89   16.60
   1   2   1   89.89   17.90
  -1   2  -1   91.49   17.90
   1   2   1  103.29   17.80
  -1   2   2  264.17   42.60
   1  -2   2  229.58   42.60
   1   2   2  251.77   42.50
  -1  -2   2  237.88   40.20
   1  -2  -2  210.98   41.80
   1  -2  -2  220.48   41.70
   1  -2   3  382.06   68.09
  -1   2   3  388.06   66.69
   1   2  -3  397.86   63.99
   1  -2  -3  351.56   63.89
   1  -2  -3  386.76   66.39
   1   2   3  361.46   66.79
   1  -2   4  300.97   64.79
   1   2   4  329.47   65.39
   1  -2  -4  376.86   60.59
   1  -2   5   82.69   15.80
  -1   2   5   75.69   14.90
   1   2  -5   52.99   15.50
  -1   2   5   46.90   15.40
  -1  -2  -5   60.89   15.40
   1   2  -5   79.69   18.30
  -1  -2  -5   51.79   17.20
  -1  -2  -5   76.99   15.70
  -1  -2  -5  103.99   16.50
  -1  -2   5   68.89   14.70
   1  -2  -5   73.49   16.40
  -1   2  -5   74.29   15.70
   1   2   5   89.29   16.00
  -1  -2   5   54.79   15.30
  -1   2  -5   80.19   16.70
   1  -2  -5   48.60   14.40
   1   2   5   67.19   15.40
  -1   2  -5   57.09   15.30
  -1   2  -5   42.50   13.40
   1  -2  -5   46.60   14.90
   1   2  -6   77.49   19.20
   1  -2   6   72.29   18.40
  -1   2   6   48.30   18.00
  -1   2   6   64.89   17.40
  -1  -2  -6   93.09   19.30
   1   2  -6  104.29   19.80
  -1  -2  -6   72.19   17.20
  -1  -2  -6   72.89   18.80
   1   2   6   88.59   18.50
   1  -2  -6   57.89   16.60
  -1   2  -6   76.69   20.80
   1  -2  -6   83.19   19.60
  -1   2  -6   78.19   18.90
   1   2   6   97.59   20.00
  -1  -2   6   86.09   18.60
  -1   2  -6   94.89   19.60
   1  -2  -6  102.59   19.80
  -1  -2   6  103.59   19.60
   1   2  -7   90.09   26.30
  -1  -2  -7  176.28   27.60
  -1  -2  -7  144.19   27.20
  -1   2   7  118.39   27.30
   1  -2  -7  141.39   26.70
   1  -2  -7  149.49   26.90
  -1  -2   7  177.38   26.90
  -1  -2   7  134.89   27.60
   1   2   7   78.49   26.10
  -1   2  -7  170.78   28.50
  -1   2  -7  153.98   26.70
  -1   2   8    8.90    9.70
   1   2  -8   12.30    7.40
  -1  -2  -8   21.50   10.20
  -1   2  -8   29.50    8.40
   1  -2  -8   25.80    8.20
   2  -2   0 3064.39  509.05
   2  -2   0 3015.60  509.65
   2   2  -1 6666.53 1082.99
  -2   2   1 6438.86 1083.99
  -2  -2  -1 6162.18 1084.09
   2  -2   1 6608.04 1083.79
   2  -2  -1 6603.34 1083.89
   2   2   1 6255.07 1083.99
   2   2   1 6501.25 1083.99
  -2   2  -1 6365.56 1083.89
   2  -2  -1 6702.73 1083.29
   2  -2   2  116.69   22.10
   2   2  -2   93.89   17.80
   2  -2  -2  118.39   20.20
   2   2   2  104.29   22.00
   2  -2  -2  102.09   17.90
   2  -2  -2   89.79   19.70
   2  -2   3  151.78   27.40
   2   2  -3  152.58   27.10
   2  -2   3  181.68   32.10
   2   2   3  141.59   30.80
   2   2   3  146.49   27.40
   2  -2  -3  152.08   27.20
   2  -2  -3  166.78   30.30
   2   2  -4   23.50    8.10
   2  -2   4   25.50   14.00
   2  -2  -4   23.20    8.10
   2   2   4   26.50   14.80
  -2  -2  -5   26.20   13.20
   2   2  -5   23.80   12.20
  -2   2   5   34.90   10.50
   2  -2   5   36.90   11.00
  -2  -2  -5   44.50   11.80
  -2  -2  -5   28.00   10.50
  -2   2   5   23.40   12.00
  -2  -2  -5   12.90   10.10
   2   2  -5   42.60   10.70
  -2   2   5   15.00    9.10
   2   2  -5   13.00   10.50
   2   2   5   34.60   10.30
   2   2   5   32.80   10.80
  -2  -2   5   50.29   13.60
   2  -2  -5   40.40   14.00
   2  -2  -5   40.10   11.10
  -2   2  -5   41.70   13.00
   2  -2  -5   25.60   11.20
  -2   2  -5   28.20   11.60
   2  -2  -5    8.20    8.40
  -2   2  -5   42.60   11.90
  -2   2  -5   17.70    9.40
  -2  -2   5   23.20   11.10
  -2   2   6   36.30   11.50
  -2   2   6   40.20   13.70
   2   2  -6   40.40   12.70
  -2  -2  -6   40.30   12.80
  -2  -2  -6    0.20   11.40
  -2  -2  -6   27.90   11.40
   2   2  -6   46.40   13.90
   2  -2   6   38.70   11.00
  -2   2  -6   15.20   10.00
  -2  -2   6   34.30   13.20
  -2  -2   6   52.69   12.40
   2   2   6   24.80   11.50
   2  -2  -6   35.40   13.40
  -2   2  -6   29.10   13.00
   2  -2  -6   26.90   10.50
  -2   2  -6   21.10   12.90
   2  -2  -6   34.00   12.60
   2   2   6   34.20   12.70
  -2   2  -6   32.50   13.20
  -2  -2  -7   -0.30    9.40
  -2   2   7    1.90   11.70
   2   2  -7    8.80   10.60
  -2  -2  -7   -2.20    9.80
  -2   2  -7  -11.20    9.90
   2  -2  -7    3.90    8.00
  -2  -2   7   -0.10   10.90
  -2  -2   7   -9.80    9.30
   2   2   7    6.60   10.10
  -2  -2  -8    9.90    6.10
  -2   2   8   -1.40    9.40
   2   2  -8    4.00    5.80
  -2  -2  -8   -3.90    8.20
  -2  -2   8    1.00   10.60
  -2   2  -8   -7.20    8.40
   2  -2  -8    1.10    8.90
   3  -2   0 4077.39  704.13
   3  -2   0 4360.46  704.93
   3   2  -1  987.10  167.88
  -3   2   1  930.31  168.88
   3  -2   1 1012.80  168.68
   3  -2  -1 1023.10  168.88
   3   2   1 1052.39  169.28
  -3   2  -1 1004.90  168.68
   3   2  -2  950.60  159.38
   3  -2   2 1068.69  161.68
   3   2  -2  965.50  159.28
   3  -2   2  924.81  159.48
   3   2   2  900.31  159.48
   3  -2  -2  940.21  159.28
   3  -2  -2  956.80  160.88
   3   2   2  982.10  161.78
   3   2  -3    3.10    5.00
   3  -2   3    7.40    6.20
   3  -2   3   -0.50   10.30
   3  -2  -3    3.70    5.90
   3  -2  -3   13.60    8.40
   3   2   3   10.70    6.00
   3   2   3    9.80   14.20
   3  -2   4   14.00   15.60
   3   2  -4   15.70    6.70
   3  -2  -4   11.40    6.90
   3   2   4   -9.90   12.20
  -3   2   5   48.10   14.10
  -3   2   5   47.30   12.30
   3   2  -5   42.60   12.20
   3  -2   5   34.00   12.60
   3   2  -5   54.39   15.30
  -3   2   5   45.20   12.30
  -3  -2  -5   34.60   12.60
  -3  -2  -5   45.70   12.60
  -3  -2  -5   40.10   12.30
  -3  -2  -5   41.20   12.70
   3   2   5   56.49   15.10
   3  -2  -5   41.80   12.50
  -3   2  -5   51.49   13.30
  -3   2  -5   46.20   13.10
  -3   2  -5   38.20   12.40
   3  -2  -5   49.99   12.50
  -3  -2   5   19.40   10.30
   3  -2  -5   29.70   10.80
  -3  -2   5   30.20   13.20
   3   2   5   40.10   12.80
  -3   2  -5   35.80   11.70
  -3   2   6   71.49   17.80
  -3  -2  -6   46.60   15.10
  -3  -2  -6   67.29   16.00
   3   2  -6   53.19   15.90
  -3   2   6   73.49   16.80
  -3  -2  -6   94.79   17.30
   3   2  -6   50.39   16.50
   3  -2   6   93.89   17.50
  -3   2   6   58.29   14.70
   3  -2  -6   63.19   16.80
  -3   2  -6   35.80   15.90
  -3   2  -6   56.19   15.30
   3   2   6   62.39   16.10
  -3  -2   6   53.39   16.80
   3  -2  -6   40.10   13.50
  -3   2  -6   54.29   16.10
   3  -2  -6   57.09   16.90
  -3  -2   6   52.29   14.40
  -3   2  -6   61.89   16.30
  -3   2   7   15.40   14.10
  -3  -2  -7   48.70   13.30
   3   2  -7   34.60   13.00
  -3  -2  -7   27.00   12.30
  -3   2  -7   39.80   13.00
  -3   2  -7   24.40   11.20
   3  -2  -7   29.50   13.30
  -3  -2   7   40.80   14.20
  -3   2   8    2.90    9.60
  -3  -2  -8   19.00    9.00
  -3  -2  -8   14.10    8.90
   3   2  -8    5.40    6.40
   3  -2  -8   20.10    7.40
  -3  -2   8   14.10    8.90
  -3   2  -8    9.60    7.10
   4  -2   0  284.67   50.59
   4  -2   0  302.57   52.19
   4   2   0  298.97   51.99
   4  -2   1  775.72  129.99
   4   2  -1  762.12  129.39
   4   2   1  770.62  130.49
   4  -2  -1  752.72  130.19
   4   2  -2  121.89   23.50
   4  -2   2  130.69   23.40
   4   2  -2  126.69   22.60
   4  -2   2  174.98   28.30
   4   2   2  150.28   23.70
   4  -2  -2  133.19   22.90
   4  -2  -2  158.38   26.40
   4   2   2  111.49   27.20
   4  -2   3  840.32  138.29
   4   2  -3  861.91  137.89
   4  -2   3  752.42  141.09
   4  -2  -3  825.62  137.99
   4   2   3  763.52  138.19
   4   2   3  808.22  141.49
   4  -2  -3  872.01  140.39
  -4  -2  -4  165.08   32.20
  -4   2   4  187.28   33.10
   4   2  -4  175.18   31.20
  -4  -2   4  169.98   33.00
   4  -2  -4  168.78   31.30
   4   2   4  156.88   31.30
  -4   2  -4  219.68   33.70
  -4  -2  -5   76.09   18.20
   4   2  -5   38.60   13.00
  -4  -2  -5   61.89   14.70
   4   2  -5   56.49   15.20
  -4   2   5   42.20   12.50
  -4  -2  -5   53.59   16.20
  -4   2   5   48.00   16.10
  -4  -2  -5   67.29   14.80
  -4   2   5   39.80   14.60
   4   2  -5   44.20   15.40
  -4   2  -5   65.69   14.90
  -4  -2   5   60.79   12.90
   4  -2  -5   57.39   14.20
  -4   2  -5   71.79   16.50
  -4   2  -5   52.19   15.10
  -4  -2   5   74.09   15.10
  -4   2  -5   45.30   13.80
  -4  -2   5   66.29   16.40
   4  -2  -5   50.69   13.10
   4  -2  -5   48.50   12.50
  -4   2   6  147.39   27.80
  -4  -2  -6   86.19   25.90
   4   2  -6  145.79   26.90
   4   2  -6  161.78   27.30
   4   2  -6  138.09   25.90
   4  -2   6  144.59   27.60
  -4   2   6  102.99   25.10
  -4   2   6  152.18   28.20
  -4  -2  -6  118.19   26.40
  -4  -2   6  186.98   29.20
  -4   2  -6  114.79   26.00
  -4   2  -6  153.38   27.50
  -4  -2   6  132.69   25.60
   4  -2  -6  122.89   26.80
   4  -2  -6  158.08   28.00
  -4   2  -6  123.49   26.80
  -4  -2  -7   24.20   12.90
   4   2  -7   53.59   13.60
  -4  -2  -7   35.00   12.40
  -4   2   7   32.00   15.20
  -4   2  -7   30.70   12.10
  -4   2  -7   58.39   11.90
   4  -2  -7   39.30   11.80
  -4  -2   7    9.00   13.40
  -4  -2  -8    8.20    5.60
   4   2  -8   15.40    8.10
  -4  -2  -8    3.50    9.00
  -4   2   8    3.80    9.20
  -4   2  -8    5.00    7.70
   4  -2  -8    5.60    6.70
   5  -2   0  427.86   73.19
   5  -2   0  429.86   74.79
   5   2   0  421.16   74.39
   5   2  -1   19.20    8.50
   5  -2   1   11.70    3.40
   5  -2   1   12.60    7.80
   5   2   1   -3.00   11.20
   5  -2  -1   18.30    8.50
   5  -2   2  118.09   18.40
   5  -2   2  123.49   24.00
   5   2  -2  110.79   19.70
   5   2   2  119.79   23.90
   5   2   2  100.49   18.30
   5  -2  -2   99.89   21.30
   5  -2  -2   90.59   17.30
   5  -2   3   87.79   24.10
   5  -2   3  109.59   19.80
   5   2  -3  111.99   19.30
   5  -2  -3  122.39   19.70
   5  -2  -3  109.19   23.10
   5   2   3   88.09   19.50
   5   2   3   98.99   25.20
  -5  -2  -4   17.10    9.60
  -5   2   4   23.30   11.10
  -5  -2  -4   24.40   10.00
  -5   2   4   21.50   12.00
   5   2  -4   23.20    7.60
  -5  -2  -4   12.80    9.00
  -5   2   4   42.10    9.20
   5  -2   4   16.60    7.60
  -5  -2   4    3.70   11.50
   5  -2  -4   24.10    8.00
  -5  -2   4   37.20   10.80
  -5   2  -4   23.60   11.00
  -5   2  -4   22.70   10.20
  -5  -2   4   18.30    8.50
   5   2   4   33.80    9.40
  -5   2  -4   23.90    9.70
   5   2  -5    7.50    8.60
  -5  -2  -5   20.40   10.70
   5   2  -5   19.70   11.00
  -5   2   5   16.80   11.60
  -5  -2  -5   14.10   12.00
  -5   2   5    0.50   12.30
   5   2  -5    3.50   12.00
  -5  -2  -5    9.10    9.60
  -5   2  -5   12.60   10.60
  -5   2  -5   17.80   11.40
  -5  -2   5   17.60   12.90
  -5   2  -5   16.20   10.40
  -5  -2   5   22.30   11.10
   5  -2  -5   14.70    9.00
   5  -2  -5   23.10   11.70
  -5  -2   5   10.80    9.30
  -5   2   6   28.80   12.80
  -5   2   6   13.50    8.90
   5   2  -6   31.70   12.20
   5   2  -6   32.50   11.80
   5   2  -6   38.90   12.50
  -5  -2  -6   28.40   13.00
  -5   2   6   24.40   14.80
  -5  -2  -6   18.80   10.80
  -5   2  -6   -4.10   11.40
  -5   2  -6   16.40   12.40
  -5  -2   6   14.10   12.80
   5  -2  -6   16.80   11.70
   5  -2  -6   20.60   11.90
  -5   2  -6   20.00   11.90
   5  -2  -6   11.90   12.60
  -5  -2   6   -4.60   13.30
   5   2  -7   14.90   11.20
  -5  -2  -7   29.10    9.20
  -5  -2  -7   13.70   12.10
  -5   2   7   34.60   13.60
  -5   2   7   22.50   13.50
  -5   2  -7   22.20   11.00
   5  -2  -7   37.40   10.90
  -5   2  -7   49.90   13.40
  -5  -2   7   18.50   13.70
   5   2  -8   21.30    7.90
  -5  -2  -8   22.80    6.30
  -5   2   8    7.70    7.20
  -5  -2  -8   27.90    9.50
  -5   2  -8    9.60    6.10
   5  -2  -8   16.30    7.10
   6  -2   0  230.68   44.30
   6   2   0  249.68   46.50
   6  -2   0  291.07   47.80
   6  -2   1  288.97   48.60
   6  -2   1  285.97   52.29
   6   2  -1  285.17   51.49
   6  -2  -1  278.37   50.99
   6  -2  -1  300.47   52.39
   6   2   1  302.97   54.29
   6  -2   2  373.86   60.89
   6  -2   2  343.37   55.49
   6   2   2  329.87   55.49
   6  -2  -2  250.97   58.69
   6   2   2  295.87   60.19
   6  -2   3  106.89   27.90
   6   2  -3  130.39   22.40
   6  -2   3  105.79   22.70
   6   2   3  116.09   28.40
   6   2   3  130.99   23.10
   6  -2  -3  141.59   22.70
  -6  -2  -4   30.70   10.10
   6  -2   4   13.00    8.00
   6   2  -4   32.10    7.90
  -6   2   4   25.70    8.10
  -6  -2  -4   25.00    9.30
  -6  -2  -4   31.80   11.50
  -6   2   4   37.40   15.60
  -6   2   4   23.00   11.70
  -6  -2   4    5.60   12.00
   6  -2  -4   30.80    8.40
  -6   2  -4   29.60   11.30
  -6   2  -4   32.20   12.20
  -6  -2   4   21.20   11.00
  -6   2  -4   24.60   11.70
   6   2   4   20.10    9.50
  -6   2  -4   13.30   10.80
  -6   2   5   33.10   13.20
   6   2  -5    5.90    8.90
  -6  -2  -5   15.80   10.70
   6   2  -5   21.70   11.10
  -6   2   5   21.00    9.50
  -6  -2  -5   30.00   11.20
  -6   2   5   19.30   14.30
  -6  -2  -5   27.20   12.80
  -6   2  -5   23.80   11.80
   6  -2  -5   28.10   11.10
   6  -2  -5   18.10    9.60
  -6   2  -5   51.99   13.70
  -6  -2   5   10.60   13.70
  -6   2  -5   48.30   13.00
  -6  -2   5   29.00   12.30
   6   2  -6    8.30   11.30
   6   2  -6   37.10   12.20
   6   2  -6   38.10   11.10
  -6  -2  -6   19.30   13.40
  -6  -2  -6   15.90   10.70
  -6   2   6   39.40   15.90
  -6   2   6   40.40   14.40
   6  -2  -6   34.30   12.40
  -6   2  -6   14.50   12.90
   6  -2  -6   45.50   12.50
  -6  -2   6   18.50   14.00
  -6   2  -6   28.00   12.20
  -6  -2   6   36.20   12.10
   6  -2  -6    2.00   12.90
  -6   2  -6   43.00   13.50
  -6  -2  -7   12.40   11.70
  -6   2   7   -0.40    8.20
  -6   2   7    1.50   12.10
  -6  -2  -7   16.70    8.60
   6   2  -7    5.30    9.10
   6  -2  -7    3.30   11.00
  -6   2  -7    8.70    8.00
  -6   2  -7    5.10    6.90
  -6  -2   7    2.30    8.50
  -6   2   8   -0.10    5.60
  -6  -2  -8    3.60    8.00
  -6   2  -8   -6.20    6.50
   6  -2  -8    2.50    5.00
   7   2   0   -4.80    9.90
   7  -2   0   11.60    8.80
   7  -2   0   13.90   11.30
   7  -2   1  141.29   31.00
   7  -2   1  147.89   23.90
   7  -2   1  128.99   28.30
   7   2  -1  128.29   29.70
   7   2  -1  134.39   28.00
   7  -2  -1  112.99   28.60
   7   2   1  123.19   29.40
   7  -2   2   19.90    6.50
   7  -2   2   12.10   14.00
   7   2   2   24.50    6.20
   7   2   2   27.30   16.80
   7  -2  -2   20.50   14.10
  -7   2   3  139.09   24.20
   7   2  -3  129.99   25.00
  -7  -2  -3  167.28   28.50
  -7   2   3  138.89   28.30
  -7   2   3  122.69   27.80
  -7  -2  -3  186.08   29.50
  -7  -2  -3  131.59   26.30
   7  -2   3  127.79   25.70
   7  -2  -3  144.89   25.30
  -7   2  -3  178.48   29.30
  -7  -2   3  132.29   27.90
  -7  -2   3  146.39   24.30
  -7   2  -3  153.88   26.80
   7   2   3  142.09   26.00
  -7   2  -3  133.59   28.10
  -7   2  -3  147.39   28.10
  -7  -2   3  149.29   28.80
  -7  -2  -4   15.40   11.10
  -7  -2  -4    9.70    9.90
  -7   2   4   26.30   13.90
   7   2  -4   28.90    7.60
  -7   2   4   21.70    9.80
  -7  -2  -4   23.20   11.00
   7  -2   4   30.50   10.00
  -7  -2   4   10.70   13.20
   7  -2  -4   21.50    8.00
   7   2   4   31.50   10.10
  -7   2  -4   23.10   12.40
  -7   2  -4   28.30   10.10
  -7  -2   4   23.80    9.60
  -7   2  -4   41.90   14.20
  -7   2  -4    9.00   11.30
  -7  -2  -5   45.60   14.10
  -7   2   5   35.70   16.40
  -7   2   5   64.39   17.80
  -7   2   5   56.29    9.60
  -7  -2  -5   64.29   17.10
  -7  -2  -5   23.80   13.30
   7   2  -5   44.30   12.80
  -7   2  -5   80.79   18.50
  -7  -2   5   69.99   16.90
  -7  -2   5   36.00   16.50
   7  -2  -5   44.20   12.20
  -7   2  -5   43.30   15.20
  -7   2  -5   60.89   16.90
   7   2  -6   10.60    9.10
  -7   2   6   -5.30   13.10
   7   2  -6   -8.80    9.60
   7   2  -6    2.90   10.00
  -7  -2  -6   -0.10    8.20
  -7  -2  -6   14.90   13.00
  -7   2   6   -9.90    8.00
  -7  -2   6   28.10   13.80
   7  -2  -6    5.90   10.30
  -7  -2   6   -0.20    9.10
  -7   2  -6    9.00   10.50
   7  -2  -6  -12.70   11.40
  -7   2  -6   10.40   12.50
   7  -2  -6    6.90   10.20
  -7  -2  -7   31.50    9.40
   7   2  -7    6.80    6.00
  -7  -2  -7   13.20    6.00
  -7   2   7   -7.20   11.40
  -7   2   7    8.80   11.80
   7  -2  -7    3.90    7.40
  -7   2  -7    7.10    8.00
  -7   2  -7   17.40    7.50
   8  -2   0  973.80  179.38
   8   2   0 1097.89  179.18
   8   2   0 1060.49  179.18
   8  -2   1  179.78   38.20
   8  -2   1  193.98   29.80
   8  -2   1  190.48   38.20
   8   2  -1  153.08   34.90
   8   2   1  165.88   29.50
   8  -2  -1  162.48   35.70
   8   2   1  125.09   35.10
   8  -2   2   91.89   29.80
  -8   2   2  148.09   28.60
   8  -2   2  130.09   26.00
  -8  -2  -2  172.58   29.40
  -8  -2  -2  126.19   27.40
  -8   2   2  147.79   24.70
  -8  -2   2  131.09   28.50
  -8   2  -2   91.89   27.50
  -8   2  -2  163.48   28.40
   8   2   2  126.29   25.90
  -8   2  -2  139.69   28.80
  -8  -2   2  158.88   24.70
  -8   2   3   29.30   11.60
  -8  -2  -3   21.30    8.60
  -8   2   3   31.30   12.60
  -8  -2  -3    8.90    9.90
   8  -2   3   23.10    7.70
  -8  -2  -3    9.90   10.60
   8   2  -3    6.70    5.20
  -8   2  -3   14.90    8.90
   8   2   3   22.20    7.60
  -8  -2   3   34.40   12.30
  -8   2  -3    9.50   10.60
  -8  -2   3   11.60   12.60
  -8   2  -3   19.40   11.50
   8  -2  -3   18.60    5.80
  -8   2  -3   11.00   11.00
  -8  -2  -4    7.60   11.00
   8  -2   4    2.90    7.60
   8   2  -4   16.00    6.50
  -8   2   4   -5.70   13.00
  -8   2   4    8.20   12.40
  -8  -2  -4   21.50   11.10
  -8  -2  -4   10.10    8.50
   8  -2  -4   12.40    7.10
  -8   2  -4   22.40   14.20
  -8   2  -4   29.60   11.70
  -8   2  -4   16.10   13.30
  -8  -2   4   11.20   11.70
  -8  -2   4   10.60   13.40
   8   2   4   12.80    9.50
  -8   2  -4   15.80    9.10
  -8   2   5   36.80   17.00
  -8   2   5   54.79   16.80
   8   2  -5   51.39   12.70
  -8  -2  -5   43.70   13.70
  -8  -2  -5   92.49   18.40
  -8   2  -5   43.10   14.30
  -8   2  -5   34.30   16.70
  -8  -2   5   54.69   17.30
   8  -2  -5   72.59   13.50
  -8  -2   5   56.29   14.80
  -8   2  -5   48.00   15.20
   8   2  -6   61.89   19.40
  -8   2   6   85.89   21.00
  -8   2   6   77.79   18.60
  -8  -2  -6   75.19   20.80
   8   2  -6   72.59   17.60
  -8  -2  -6   72.49   18.20
  -8  -2   6   64.19   20.90
   8  -2  -6   71.29   19.60
   8  -2  -6   52.59   17.10
  -8   2  -6  103.19   18.80
  -8   2  -6   76.19   21.10
  -8  -2   6   92.19   15.00
  -8  -2  -7   10.60   10.90
  -8   2   7   -2.20    7.10
  -8   2   7   -2.90    7.30
  -8  -2   7   17.10    9.80
  -8   2  -7    1.20    8.00
  -8   2  -7   -0.30    7.20
   8  -2  -7   29.30    9.70
  -9   2   0   23.60   11.50
  -9  -2   0   19.00   11.50
   9   2   0    2.00   14.20
  -9   2   1  194.68   33.80
   9  -2   1  229.58   34.50
  -9   2   1  183.78   36.90
  -9  -2  -1  199.78   37.10
  -9   2   1  195.98   37.30
  -9  -2  -1  226.08   37.60
  -9  -2   1  195.48   33.80
  -9   2  -1  181.18   36.70
  -9   2  -1  236.98   37.90
  -9   2  -1  224.38   37.80
  -9  -2   1  212.78   37.40
  -9  -2   1  210.48   37.70
   9   2   1  188.58   34.10
  -9   2   2   24.90   11.90
  -9  -2  -2  -16.70   10.30
   9  -2   2   12.20    6.40
  -9  -2  -2    3.80   10.00
  -9  -2   2   20.50   12.10
  -9   2  -2   17.10   10.90
   9   2   2   11.40    6.00
  -9   2  -2    6.30    9.30
  -9   2  -2    0.60   10.90
   9   2  -3   43.80    9.70
  -9  -2  -3   49.40   17.40
   9  -2   3   54.49   12.10
  -9   2   3   39.00   15.40
  -9  -2  -3   38.20   13.70
  -9   2   3   34.30   15.70
   9  -2  -3   44.30   10.20
  -9  -2   3   55.99   13.30
  -9   2  -3   56.19   16.60
  -9   2  -3   48.90   15.60
  -9   2  -3   59.09   15.90
   9   2   3   49.50   11.60
   9   2  -4  123.39   23.10
  -9   2   4  144.59   27.50
  -9  -2  -4  129.49   26.80
  -9   2   4  112.19   27.00
  -9  -2  -4  112.19   25.80
   9  -2   4  134.49   24.90
  -9   2  -4  153.68   24.80
  -9  -2   4  142.99   27.50
  -9   2  -4  121.39   25.50
  -9   2  -4  104.49   26.70
   9   2   4  141.09   24.60
   9  -2  -4  120.29   23.20
  -9   2  -4   95.39   26.20
  -9   2   5   24.80   10.80
  -9   2   5    6.30   13.70
  -9  -2  -5   16.60   10.30
   9   2  -5    0.20    7.40
  -9   2  -5    9.00   10.90
   9  -2  -5   20.10    7.30
  -9   2  -5   11.40   10.30
  -9   2  -5   22.10   11.20
  -9  -2   5    2.70    9.40
  -9   2   6   -0.40   11.90
  -9  -2  -6   -0.20   12.10
  -9   2   6    1.70    8.60
  -9  -2   6   -2.10   12.50
  -9   2  -6   10.20   12.70
  -9   2  -6  -13.10    8.30
   9  -2  -6   -1.20   10.50
  -9  -2  -7    6.60    9.40
  -9   2   7    4.50    7.10
   9  -2  -7   10.80    5.70
  -9   2  -7    9.80    6.60
  -9  -2   7    2.50    8.60
  -9   2  -7   -2.80    9.00
 -10  -2   0   39.40   15.10
 -10   2   0   45.40   17.40
 -10  -2  -1   22.10   13.00
  10  -2   1   13.30    5.30
 -10   2   1   19.40   14.00
 -10  -2  -1    2.20    9.90
 -10   2   1    8.20   10.90
 -10   2  -1    1.20    9.60
 -10  -2   1    0.30   11.00
  10   2   1    5.60    4.40
 -10  -2   1    9.60   11.80
 -10   2  -1   -3.20   11.80
 -10   2   2  223.38   46.70
 -10  -2  -2  215.98   45.90
  10  -2   2  292.37   44.40
 -10  -2  -2  271.87   46.80
 -10   2  -2  259.97   47.20
 -10  -2   2  233.78   46.80
 -10   2  -2  250.37   46.30
  10   2   2  242.88   44.00
 -10   2  -2  285.77   47.20
 -10  -2  -3   51.89   16.10
 -10   2   3   40.50   16.00
 -10  -2  -3   66.89   16.20
  10  -2   3   38.30   10.90
  10   2  -3   30.90    7.90
  10  -2  -3   30.80    8.20
  10   2   3   41.50   10.70
 -10   2  -3   26.50   12.70
 -10   2  -3   38.20   15.30
 -10  -2   3   35.70   13.00
 -10   2  -3   24.50   14.40
 -10   2   4   83.99   21.80
  10  -2   4  106.09   18.90
  10   2  -4   83.39   16.30
 -10  -2  -4   93.19   20.90
 -10  -2  -4   66.89   19.90
  10   2   4   59.79   16.90
 -10   2  -4   66.09   19.50
 -10   2  -4  154.18   23.60
 -10   2  -4   52.89   19.90
 -10  -2   4  106.09   21.90
  10  -2  -4  105.49   16.90
 -10  -2  -5   35.30   11.70
 -10   2   5   33.70   14.50
 -10   2  -5   49.30   13.30
 -10   2  -5   30.60   15.30
 -10   2  -5   23.10   11.10
  10  -2  -5   14.50    8.50
 -10  -2   5   14.60   10.30
 -10  -2  -6   74.59   18.70
 -10   2   6   72.99   16.80
 -10  -2   6   38.10   17.40
  10  -2  -6   78.29   15.60
 -10   2  -6  123.29   18.40
 -11   2   0    8.10   13.00
 -11  -2   0   -9.70   12.00
 -11  -2  -1  124.09   29.60
  11  -2   1  147.79   25.50
 -11   2   1  103.79   28.00
 -11  -2   1  129.19   29.30
 -11  -2   1  175.78   29.60
 -11   2  -1  125.09   29.90
  11   2   1  154.78   25.20
 -11  -2  -2  108.29   30.10
 -11   2   2  170.58   33.20
  11  -2   2  183.68   29.30
 -11  -2  -2  144.59   32.80
  11   2   2  191.08   29.10
 -11   2  -2  135.59   32.90
 -11  -2   2  205.18   32.50
 -11   2  -2  137.89   31.10
 -11   2   3   85.09   23.30
  11   2  -3  108.29   18.20
  11  -2   3  114.29   19.70
 -11  -2  -3   72.69   21.10
 -11  -2   3  104.89   23.90
 -11   2  -3   60.19   21.10
  11  -2  -3   98.09   18.20
  11   2   3  123.19   20.40
 -11   2  -3  145.79   25.20
 -11   2  -3   73.89   23.30
 -11   2   4  127.59   27.00
  11   2  -4  122.59   24.00
  11  -2   4  109.79   24.70
 -11  -2  -4  120.39   27.80
 -11  -2  -4  197.58   28.80
 -11   2  -4  125.39   28.50
  11  -2  -4  154.98   24.20
 -11   2  -4  205.18   29.00
 -11  -2   4  100.19   27.70
 -11   2  -4  106.39   26.30
 -11   2   5   77.39   16.40
 -11  -2  -5   68.49   18.10
 -11   2  -5   60.69   14.50
 -11   2  -5   59.29   18.30
 -11   2  -5   53.59   16.10
 -11  -2   5   72.39   16.10
 -11   2   6    8.00    8.30
  11  -2   6   25.30    9.20
 -11  -2  -6   48.30   10.20
 -11   2  -6   30.80   10.20
 -11  -2   6   34.20    9.20
 -11   2  -6   43.70   10.40
 -12   2   0   13.70   14.40
 -12  -2   0   17.20   14.80
 -12  -2  -1   27.60   15.90
  12  -2   1   28.00    8.10
 -12   2   1   13.00   13.80
  12   2   1   34.30    8.40
 -12   2  -1   36.40   15.80
 -12  -2   1   23.60   14.90
 -12  -2   1   23.30   14.10
 -12  -2  -2   56.19   20.30
 -12   2   2   70.39   20.50
  12  -2   2   86.19   16.00
  12   2   2   87.79   15.70
 -12  -2   2   61.69   20.10
 -12   2  -2   69.09   21.90
  12   2  -3   25.90    8.20
 -12   2   3   47.20   13.90
  12  -2   3   42.30   10.20
 -12  -2  -3   57.89   14.80
 -12   2  -3   27.30   17.10
  12  -2  -3   34.20    8.50
  12   2   3   52.39   11.70
 -12   2  -3   22.00   12.10
 -12  -2   3   33.80   15.20
 -12  -2  -4   12.90   11.30
 -12   2   4   24.00   11.00
 -12  -2  -4   -6.80   12.30
 -12   2  -4   33.50   13.50
 -12  -2   4    6.90   12.20
 -12   2  -4    8.00    9.10
 -12  -2  -5    3.10    8.00
 -12   2   5   -7.60    7.70
 -12  -2   5    1.80   10.60
 -12   2  -5    0.90    7.80
 -12  -2   5    1.00    4.80
  13  -2   0   15.50    9.00
 -13   2   0   -7.00    8.60
 -13  -2   0    3.20   13.60
 -13  -2  -1  256.47   48.30
  13  -2   1  255.57   45.10
 -13  -2   1  239.58   47.60
 -13  -2   1  264.87   52.19
  13   2   1  274.07   45.10
  13  -2   2  112.49   16.70
 -13   2   2   51.79   21.00
 -13  -2   2   51.39   20.10
  13   2   2   90.49   16.40
 -13   2  -2   51.39   21.10
 -13   2   3    5.20   12.80
 -13  -2  -3   -9.30   12.10
  13  -2   3   -1.90    7.90
 -13  -2   3    9.80   12.90
 -13   2  -3  -17.00    9.20
 -13  -2  -4   27.10   11.60
 -13   2   4   29.10   13.10
 -13   2  -4   18.90    9.70
 -13  -2   4    5.40   11.80
 -13   2   5   -3.60    9.20
 -13  -2   5   20.60    7.10
 -14   2   0    0.20   12.60
 -14  -2   0   -2.60   13.00
 -14   2  -1    6.30   14.80
 -14  -2   1   -7.90   11.30
 -14  -2   2   -8.30    7.80
 -14   2   3   -0.20    7.20
 -14  -2   3   35.00   10.10
 -14   2  -3   21.60   10.50
 -14   2   4   -1.30    6.30
 -14  -2  -4   -0.30    5.40
 -14   2  -4    2.50    6.80
 -14  -2   4    4.30    7.10
 -15  -2   0    2.90    8.40
 -15   2   0    0.80   12.50
 -15   2  -1    1.20    9.30
 -15   2  -2   13.00    9.90
 -15  -2   3    7.90   11.80
 -16  -2   0  -10.10   13.70
 -16  -2  -1    6.00    7.50
 -16   2  -1    3.80    7.10
   0   3   0   -5.70    3.60
   0  -3   0   -1.60    3.60
   0   3  -1  118.09   24.20
   0  -3  -1  133.59   23.00
   0   3   1  128.19   24.10
   0  -3  -1  151.78   24.30
   0   3   1  114.19   23.10
   0  -3   1  131.49   22.60
   0  -3  -2  623.84  106.49
   0   3   2  623.04  106.49
   0  -3  -3  487.95   85.49
   0   3   3  535.45   88.29
   0   3  -3  513.15   85.59
   0   3   4   30.50   16.20
   0   3  -5  165.68   31.10
   0  -3  -5  172.28   31.40
   0   3  -5  141.39   31.90
   0  -3   5  147.39   30.70
   0  -3  -5  201.18   32.20
   0  -3   5  160.88   30.90
   0   3  -5  182.58   32.80
   0  -3  -5  171.08   31.40
   0   3   5  178.08   31.10
   0   3   5  147.19   31.10
   0  -3  -6  154.98   27.10
   0  -3  -6   82.79   24.70
   0  -3  -6  142.79   26.60
   0   3   6  115.89   25.40
   0   3   6  134.99   26.30
   0  -3   6  169.98   26.60
   0   3  -6  183.28   27.60
   0   3  -6  138.19   26.50
   0  -3  -6  105.99   25.80
   0   3  -6  109.99   26.20
   0  -3   7    3.50   11.10
   0  -3  -7    5.80   10.70
   0   3  -7   11.80    8.70
   0  -3  -7   21.30    9.80
   0   3  -7   34.50   12.10
   0   3   7    3.90   11.40
   0  -3  -8   17.00    7.30
   0   3  -8    5.40    9.10
   0   3   8    4.20    6.60
   1   3   0 1089.29  186.78
  -1  -3   0 1077.59  186.78
  -1   3   0 1100.19  186.28
   1  -3   0 1145.49  187.08
  -1   3   0 1162.88  187.18
  -1  -3  -1 1781.42  289.67
   1  -3   1 1703.33  289.17
  -1   3   1 1775.72  288.87
  -1  -3  -1 1673.53  289.47
   1  -3   1 1846.82  289.47
  -1   3   1 1647.04  289.57
   1  -3  -1 1762.12  288.87
   1   3   1 1707.93  289.77
   1   3   1 1628.94  289.47
  -1   3  -1 1642.54  289.47
   1  -3  -1 1802.62  289.67
  -1   3   2  804.92  128.69
   1   3  -2  750.42  127.29
   1  -3   2  759.62  129.09
   1   3   2  772.82  128.89
  -1  -3   2  770.92  126.99
   1  -3  -2  697.03  128.29
   1  -3  -2  754.42  128.79
   1  -3   3 1140.09  186.68
  -1   3   3 1070.69  185.78
   1   3   3 1079.39  185.98
   1  -3  -3 1087.39  185.48
   1  -3  -3 1097.29  183.58
  -1   3   4   17.10   14.80
   1   3  -4   36.70    9.90
   1   3   4   31.60   14.90
   1  -3  -4   39.00    9.70
  -1   3   5   20.70    7.20
   1  -3   5    0.70    8.40
  -1  -3  -5    8.20    9.30
  -1   3   5   -4.60    7.60
  -1   3   5  -11.60   11.10
  -1  -3  -5   -6.60    8.50
   1   3  -5  -11.80    8.00
  -1  -3  -5   11.60    9.80
   1   3  -5   19.30   10.60
   1  -3  -5  -14.00    8.10
   1   3   5   -0.50    8.30
  -1  -3   5   -1.20   10.40
   1  -3  -5    0.10   10.80
   1   3   5   -7.20    8.20
  -1   3  -5  -12.30    9.30
  -1   3  -5    1.10    8.60
   1  -3  -5   -2.10    8.00
  -1   3  -5    3.80    9.40
  -1  -3   5    0.80    7.50
   1   3  -6   93.59   20.80
  -1  -3  -6  112.19   21.50
  -1  -3  -6   98.79   21.10
  -1  -3  -6   74.19   20.50
  -1  -3  -6  101.89   21.00
  -1   3   6   84.99   19.80
   1   3  -6   76.09   20.40
   1  -3   6   98.29   20.80
  -1   3   6  112.99   21.30
  -1  -3   6   85.89   19.80
  -1  -3   6   79.79   21.80
   1  -3  -6  118.29   22.20
  -1   3  -6   79.09   20.90
  -1   3  -6  104.79   21.40
   1   3   6  118.59   21.20
   1  -3  -6  104.09   20.60
   1  -3  -6   88.69   20.90
  -1   3  -6   66.79   20.50
   1   3   6   87.79   20.40
   1   3  -7   24.60   12.20
   1  -3   7   45.80   12.80
   1   3  -7   26.20   12.00
  -1   3   7   16.30   12.60
  -1  -3  -7   12.90   11.20
  -1  -3  -7   14.10   10.40
  -1  -3   7   31.70   12.10
   1  -3  -7   24.30   12.00
  -1   3  -7   13.40   12.30
   1  -3  -7    8.20    8.90
  -1   3  -7   30.00   10.60
  -1   3  -7    4.30   10.70
   1   3   7    7.50   11.40
  -1  -3  -8    4.80    8.70
   1   3  -8    2.40    8.70
  -1   3   8    7.00    6.50
  -1  -3  -8   23.00    9.40
   1  -3  -8    7.90    9.30
  -1   3  -8   -1.30    8.60
  -2   3   0 1746.63  299.37
   2  -3   0 1797.42  298.17
   2  -3   0 1819.32  299.27
  -2   3   0 1735.13  298.17
   2   3   0 1825.72  298.87
   2   3  -1  753.02  129.49
  -2   3   1  717.53  131.09
   2  -3   1  833.22  130.79
  -2  -3  -1  734.43  131.19
   2   3   1  764.82  131.29
   2  -3  -1  820.52  131.19
   2   3   1  767.62  131.29
  -2   3  -1  768.62  130.89
   2  -3  -1  797.22  129.89
   2   3  -2 1163.38  191.78
   2  -3   2 1212.68  193.68
   2  -3  -2 1109.19  192.88
   2  -3  -2 1209.28  193.48
   2  -3  -2 1116.49  191.78
   2   3   2 1117.29  191.88
   2   3   2 1121.99  193.58
   2   3  -3   80.79   15.10
   2  -3   3   79.89   15.50
   2  -3   3  109.99   20.80
   2  -3  -3   63.69   15.00
   2   3   3   75.09   19.30
   2   3   3   80.49   15.50
   2  -3  -3  103.99   19.90
   2  -3   4   17.50   16.40
   2  -3  -4   65.49   12.00
   2   3   4   40.40   16.90
   2   3  -5  113.99   22.90
  -2   3   5  100.29   22.50
  -2  -3  -5  122.29   24.50
   2   3  -5  100.49   23.80
  -2  -3  -5  129.39   24.10
   2  -3   5  163.68   24.20
   2   3  -5  135.99   23.70
  -2  -3  -5  104.09   22.80
  -2   3   5  144.29   24.60
  -2  -3  -5  143.49   24.30
  -2   3   5  101.79   22.70
  -2   3  -5   91.89   22.30
   2  -3  -5  133.49   23.70
   2   3   5  127.39   23.60
  -2  -3   5  107.19   23.60
   2  -3  -5  103.79   23.10
   2   3   5  109.29   23.00
   2  -3  -5  101.39   21.90
  -2   3  -5  144.59   25.30
  -2  -3   5  116.89   23.20
  -2   3  -5  106.19   23.60
  -2   3  -5  126.19   23.60
  -2   3   6   -5.40    8.60
  -2   3   6    9.80   11.70
   2   3  -6  -11.60   10.50
  -2  -3  -6    0.80    9.80
   2   3  -6   -7.40   10.50
  -2  -3  -6    4.40   10.20
  -2  -3  -6   11.40   10.00
   2  -3   6   12.10   10.60
  -2   3  -6  -11.40   10.30
   2  -3  -6    4.70   10.30
   2   3   6   15.20    9.90
  -2   3  -6  -19.30   10.40
  -2  -3   6    2.50   10.90
  -2   3  -6   -5.70   10.00
   2  -3  -6   -3.50   11.80
  -2  -3   6    8.00    9.50
   2  -3  -6    4.20   10.80
   2   3   6    0.30   10.10
  -2   3   7   38.20   11.30
  -2  -3  -7   15.40   11.80
  -2  -3  -7   34.30   10.30
   2   3  -7   59.69   14.00
   2   3  -7    7.20   11.60
   2  -3   7   26.60   10.10
   2   3   7   22.10   12.00
  -2   3  -7   18.30   11.00
  -2   3  -7   46.60   11.00
   2  -3  -7   36.20   11.00
  -2  -3   7   19.60   12.40
   2  -3  -7   40.60   13.10
  -2   3   8    9.50    9.70
   2   3  -8    4.40    8.50
  -2  -3  -8    5.80    6.30
  -2  -3  -8   -0.10    8.90
   2  -3  -8   16.40    7.40
  -2   3  -8   20.20    7.30
   3  -3   0   49.20   10.20
   3  -3   0   66.79   13.60
   3  -3   1 1353.36  219.98
   3  -3  -1 1263.07  219.18
   3  -3  -1 1357.06  220.58
  -3   3  -1 1307.27  220.18
   3   3   1 1273.47  220.58
   3  -3   2  268.57   48.20
   3  -3   2  313.27   51.49
   3   3  -2  289.37   47.90
   3  -3  -2  272.97   49.50
   3  -3  -2  282.87   48.00
   3   3   2  286.37   48.20
   3  -3  -2  280.47   50.59
   3   3   2  291.37   51.89
   3  -3   3   23.50   13.70
   3  -3   3   42.10    9.70
   3   3  -3   37.20    9.30
   3  -3  -3   36.30    9.00
   3  -3  -3   51.39   14.10
   3   3   3   46.40   14.60
   3   3   3   39.70    9.50
   3   3  -4   72.99   14.40
   3  -3   4   70.49   20.40
   3   3   4   45.30   19.20
   3  -3  -4   74.99   14.60
   3   3  -5    2.80    8.60
  -3   3   5    0.00   10.80
   3   3  -5   18.60   10.20
  -3  -3  -5   -0.60    8.80
  -3   3   5   12.60    9.50
  -3  -3  -5   18.90    9.50
  -3  -3  -5    6.20    9.70
   3   3  -5   16.10    9.30
  -3  -3  -5    9.90    9.70
   3  -3   5    7.30    9.80
  -3   3   5    3.40    7.60
   3  -3  -5    9.20    9.30
  -3  -3   5   -1.00   10.30
  -3   3  -5   20.10   10.90
  -3  -3   5   11.00    8.10
   3   3   5   38.70   11.20
   3  -3  -5   12.10   11.00
   3  -3  -5    9.10   10.10
  -3   3  -5   -2.60    8.70
  -3   3  -5    8.40    8.40
  -3   3  -5   14.00   12.10
   3   3   5    8.70    9.90
  -3  -3  -6  120.99   23.20
  -3   3   6  122.09   22.00
  -3   3   6   60.89   22.60
   3   3  -6  102.99   22.60
   3  -3   6  122.19   23.10
  -3  -3  -6  130.29   23.30
  -3  -3  -6  136.59   23.10
   3   3  -6  141.49   24.10
   3   3   6  102.79   23.20
   3   3   6   88.89   22.30
   3  -3  -6   72.99   22.70
  -3   3  -6  134.49   22.50
  -3  -3   6   94.39   23.30
  -3  -3   6   93.09   21.40
  -3   3  -6  122.49   22.50
  -3   3  -6   71.99   22.20
   3  -3  -6  101.59   22.90
  -3  -3  -7   14.40   10.50
  -3  -3  -7   18.30   11.50
  -3   3   7   13.00    9.40
   3   3  -7   12.90    8.20
   3   3  -7    0.40   11.50
  -3   3  -7   -6.30   12.00
  -3  -3   7   16.00   12.50
  -3   3  -7   18.40    8.90
   3  -3  -7   16.50   12.10
  -3   3   8    5.20    7.30
   3   3  -8    7.40    8.20
   3   3  -8    4.60    9.40
  -3  -3  -8   23.00    7.10
  -3  -3  -8   12.50    8.30
   3  -3  -8   15.90    9.60
  -3   3  -8    0.40    7.50
   4   3   0 2359.86  401.46
   4  -3   0 2474.45  401.46
   4  -3   0 2347.47  400.26
   4  -3   1  589.14   95.39
   4  -3   1  556.14   93.59
   4   3   1  537.25   93.49
   4   3   1  584.94   96.29
   4  -3  -1  566.14   95.99
   4  -3   2  143.49   27.10
   4   3  -2  138.59   23.10
   4  -3   2  129.49   23.70
   4  -3  -2  123.19   26.60
   4  -3  -2  132.59   25.30
   4   3   2  139.19   23.80
   4  -3  -2  132.59   23.50
   4   3   2  123.39   27.90
   4  -3   3  126.79   28.20
   4  -3   3  115.99   23.60
   4   3  -3  129.79   23.60
   4  -3  -3  138.89   23.50
   4   3   3  141.89   23.80
   4  -3  -3  111.89   27.30
   4   3   3  154.68   30.50
   4   3  -4  189.58   34.70
  -4   3   4  187.68   36.10
  -4  -3  -4  239.98   37.00
   4  -3   4  195.68   35.30
  -4   3   4  223.68   36.30
   4  -3  -4  204.68   34.70
  -4   3  -4  191.28   35.60
  -4   3  -4  187.08   36.10
  -4  -3   4  186.48   36.30
   4   3   4  169.38   35.10
   4   3  -5   19.40   11.20
   4   3  -5   24.00   10.30
  -4  -3  -5    6.90    9.50
  -4   3   5    8.70    7.80
  -4   3   5    9.30   10.00
  -4   3   5  -10.50   11.00
  -4  -3  -5   19.30    9.60
  -4  -3  -5   -6.50    8.60
  -4  -3   5  -14.10   10.90
  -4  -3   5   11.30    9.50
   4  -3  -5   -4.40    9.60
   4  -3  -5  -19.80   10.10
  -4   3  -5   11.30   10.60
   4   3   5   10.80   11.80
   4  -3  -5    3.40    7.50
  -4   3  -5   34.00   12.90
  -4  -3   5   11.30    7.90
  -4   3  -5   16.10   10.00
  -4   3  -5   20.00   11.20
  -4  -3  -6   52.49   15.60
  -4  -3  -6   42.60   13.90
  -4   3   6   54.39   13.70
   4  -3   6   82.79   16.70
  -4  -3  -6   36.00   15.00
   4   3  -6   47.60   14.90
  -4   3   6   57.79   16.20
  -4   3   6   23.00   15.80
   4   3  -6   47.00   14.80
   4   3  -6   73.89   16.10
  -4  -3   6   37.60   16.20
  -4   3  -6   28.60   23.80
   4  -3  -6   66.19   15.50
  -4   3  -6   65.19   16.60
   4  -3  -6   70.29   17.10
   4  -3  -6   42.50   13.10
  -4   3  -6   73.09   15.80
   4   3   6   57.09   15.90
  -4   3  -6   42.50   15.20
  -4  -3  -7   82.79   19.20
  -4   3   7   31.50   18.50
  -4  -3  -7   64.99   16.10
   4   3  -7  102.79   18.30
   4   3  -7  100.89   17.70
  -4   3  -7   39.00   18.50
  -4   3  -7  129.29   19.80
  -4  -3   7   65.19   19.30
   4  -3  -7   55.79   18.80
  -4   3  -7  139.59   19.10
   4   3  -8   25.60    7.80
  -4  -3  -8    4.40    9.50
  -4  -3  -8   12.70    6.00
   4   3  -8   22.80    6.60
  -4   3   8    8.30    9.60
   4  -3  -8   10.60    9.20
  -4   3  -8    8.50    8.00
   5  -3   0 1915.51  320.27
   5   3   0 1917.11  321.67
   5  -3   0 1891.71  321.57
   5  -3   1 1181.08  198.18
   5   3  -1 1220.08  197.98
   5  -3   1 1192.38  196.38
   5  -3  -1 1124.79  198.88
   5   3   1 1088.19  196.28
   5   3   1 1218.48  199.48
   5  -3  -1 1239.88  197.48
   5   3  -2   18.00    4.20
   5  -3   2   15.90    5.90
   5  -3   2   10.60   12.30
   5  -3  -2   21.70    4.90
   5   3   2   13.40   11.80
   5   3   2   23.40    6.40
   5  -3  -2   21.10   10.60
   5  -3   3  159.78   32.10
   5   3  -3  151.38   26.50
   5  -3   3  165.38   27.30
   5   3   3   87.09   30.40
   5  -3  -3  146.59   30.60
   5  -3  -3  152.78   26.60
   5   3   3  152.98   27.20
  -5   3   4  202.38   31.70
  -5   3   4  140.39   27.60
   5  -3   4  173.28   30.20
  -5   3   4  194.18   31.70
   5   3  -4  193.58   29.50
  -5  -3  -4  167.88   30.60
  -5   3   4  161.08   29.40
  -5  -3  -4  155.38   30.30
  -5   3  -4  193.98   31.40
  -5  -3   4  196.38   31.50
  -5   3  -4  245.18   33.00
   5  -3  -4  189.78   29.90
  -5   3  -4  177.28   30.80
  -5  -3   4  154.18   27.70
  -5  -3   4  226.08   32.60
   5   3  -5    8.70   10.00
  -5  -3  -5   12.80   10.10
  -5   3   5   29.20   12.20
   5   3  -5    1.50   12.00
  -5   3   5   -0.80   12.30
  -5   3   5   20.60    9.50
  -5  -3  -5   18.40    9.50
  -5  -3  -5    9.40   10.30
  -5  -3   5    1.10   12.40
  -5   3  -5   35.90   11.80
   5  -3  -5   10.90    9.00
  -5  -3   5   17.80   10.60
  -5   3  -5   12.30   12.50
  -5   3  -5   13.20   10.80
   5  -3  -5   13.50    9.30
   5  -3  -5   12.90    9.90
  -5   3   6   24.90   12.60
   5   3  -6  -15.00   10.10
  -5   3   6    7.50   13.50
   5   3  -6   22.40   11.00
  -5   3   6   12.70    8.70
  -5  -3  -6   25.40   12.30
  -5  -3  -6   15.50    9.70
   5   3  -6   11.60   11.20
  -5   3  -6   -1.50    8.60
   5  -3  -6   21.50   12.40
  -5  -3   6   25.70   13.90
  -5   3  -6    5.80   10.50
  -5  -3   6   26.70   16.00
   5  -3  -6   19.40   13.40
   5  -3  -6   17.40   11.20
  -5   3  -6   21.50   12.20
  -5  -3  -7    8.60    6.60
  -5   3   7   20.40   13.00
  -5  -3  -7    4.80   11.00
   5   3  -7   19.80    9.90
   5   3  -7   17.40   10.60
  -5   3   7   35.10   12.40
  -5   3  -7   10.90    8.90
  -5  -3   7   14.90   12.20
   5  -3  -7    8.60   11.40
  -5   3  -7   -2.50    9.40
  -5   3  -7   13.10   10.30
  -5   3   8    3.40    6.30
  -5  -3  -8   11.60    6.10
  -5  -3  -8    2.20    8.50
   5   3  -8    3.50    6.20
  -5   3  -8    6.00    7.30
   5  -3  -8   -4.40    5.50
   6  -3   0  111.49   24.60
   6   3   0   96.79   24.80
   6  -3   0  113.59   21.60
   6  -3   1  362.96   61.19
   6  -3   1  326.07   55.89
   6  -3   1  314.77   58.79
   6   3  -1  363.46   59.09
   6  -3  -1  334.97   60.09
   6   3   1  323.57   55.79
   6  -3  -1  343.27   57.89
   6   3   1  354.96   61.29
   6  -3   2   39.50    8.60
   6  -3   2   74.79   16.40
   6   3   2   27.10   15.30
   6  -3  -2   36.40    7.30
   6   3   2   38.10    8.40
   6  -3  -2   43.10   15.10
   6   3  -3   54.79   10.60
   6  -3   3   38.80   16.50
   6  -3   3   55.69   11.90
   6  -3  -3   51.09   11.40
   6   3   3   31.90   18.20
   6   3   3   63.49   12.00
  -6   3   4   -2.80   10.90
   6   3  -4   17.90    7.30
  -6  -3  -4   31.40   11.30
  -6   3   4   16.00    8.10
  -6  -3  -4   21.10   10.90
  -6   3   4   27.10   12.90
   6  -3   4   24.90    9.60
  -6  -3  -4   34.80   11.60
  -6  -3   4   21.20   11.10
  -6   3  -4   33.20   12.50
  -6   3  -4   27.40   11.80
   6  -3  -4   24.20    8.30
  -6   3  -4   34.30   12.20
  -6  -3   4   31.10   13.20
  -6   3  -4   26.60   12.10
   6   3   4   26.10    9.60
  -6   3   5   14.80   14.40
  -6  -3  -5   30.10   12.80
  -6   3   5   22.70    9.90
  -6   3   5   24.50   13.30
  -6  -3  -5   27.10   11.00
  -6  -3  -5    7.70   10.50
   6   3  -5   36.60   11.70
   6   3  -5   43.10   14.10
  -6   3  -5   15.30   11.60
   6  -3  -5   17.80   10.10
   6  -3  -5   33.80   13.50
  -6  -3   5   34.50   14.40
  -6   3  -5   42.90   13.80
  -6  -3   5   26.70   12.00
  -6   3  -5   35.40   12.80
  -6   3   6   24.00    9.70
   6   3  -6   20.40    9.50
  -6  -3  -6    8.50   11.00
   6   3  -6   23.20   10.30
  -6   3   6   12.00   12.90
  -6   3   6   30.60   14.50
   6   3  -6   13.80   10.00
  -6  -3  -6   16.40   12.40
  -6  -3  -6    8.50    8.90
  -6  -3   6   10.00   13.40
  -6   3  -6   -0.90   11.50
   6  -3  -6   16.80    9.70
   6  -3  -6   -2.30   10.10
  -6   3  -6    6.00   10.00
  -6   3  -6    6.80   11.60
  -6  -3   6   19.40   10.50
  -6  -3  -7   15.80    8.80
  -6   3   7   24.30   10.40
  -6  -3  -7   14.60   12.30
  -6   3   7   32.50   13.10
   6   3  -7   38.30    9.50
   6   3  -7   14.00    9.60
  -6   3  -7   44.60   10.60
   6  -3  -7   19.40    9.80
  -6   3  -7   21.70    8.70
  -6   3   8    6.90    5.80
  -6  -3  -8   -3.70    7.50
   6   3  -8   -5.90    7.20
  -6   3  -8   14.20    6.80
   6  -3  -8   -2.10    5.20
   7   3   0  887.71  162.08
   7  -3   0 1011.50  162.78
   7   3  -1   -0.40   10.30
   7   3  -1   -0.60   12.50
   7  -3   1   -4.80    9.30
   7  -3   1    3.60   12.50
   7  -3   1    8.40    3.60
   7  -3  -1    1.90   10.50
   7   3   1    5.50   12.80
   7   3   1    4.20    2.70
   7  -3   2   81.99   21.80
   7  -3   2  106.89   17.70
   7  -3  -2   88.29   16.40
   7  -3  -2   76.99   22.50
   7   3   2   65.69   22.50
   7   3   2  111.89   17.60
  -7  -3  -3  155.08   30.00
   7   3  -3  193.58   28.70
  -7   3   3  222.38   32.70
  -7   3   3  151.18   27.90
   7  -3   3  173.68   29.70
  -7  -3  -3  205.48   31.50
  -7   3   3  171.48   31.60
  -7  -3  -3  165.28   30.90
  -7   3  -3  197.28   32.10
  -7  -3   3  180.08   31.80
  -7  -3   3  184.98   32.40
  -7   3  -3  193.48   30.80
   7  -3  -3  183.58   29.30
   7   3   3  164.58   29.70
  -7   3  -3  176.98   31.60
  -7  -3   3  142.99   28.00
  -7   3  -3  229.38   32.90
  -7  -3  -4  196.28   30.40
   7   3  -4  186.78   27.50
  -7   3   4  170.08   31.00
   7  -3   4  132.59   27.80
  -7   3   4  152.98   30.10
  -7  -3  -4  182.18   29.00
  -7   3   4  132.59   25.80
   7  -3  -4  185.48   28.10
  -7  -3   4  140.99   29.80
  -7   3  -4  173.78   29.10
  -7   3  -4  159.28   29.80
  -7   3  -4  167.08   30.20
  -7   3  -4  183.78   30.00
   7   3   4  168.68   28.60
  -7  -3   4  144.09   25.90
  -7  -3   4  191.88   31.30
  -7  -3  -5   55.79   15.30
  -7   3   5   68.99   16.10
  -7  -3  -5   94.79   18.50
  -7   3   5   61.59   11.00
  -7   3   5   53.49   18.50
  -7  -3   5   64.09   17.80
  -7   3  -5   85.19   17.60
  -7   3  -5   86.49   19.50
  -7  -3   5   49.10   17.90
   7  -3  -5   63.49   14.80
  -7   3  -5   46.40   15.70
  -7  -3  -6   -1.50   12.80
  -7   3   6   -9.60   12.40
   7   3  -6  -19.80    9.10
   7   3  -6   -6.80    8.40
  -7  -3  -6    2.10    7.90
  -7   3   6    0.90   13.10
   7   3  -6  -12.10    9.00
  -7   3  -6  -14.90   11.30
  -7  -3   6   -2.40   12.60
   7  -3  -6   -0.10    9.90
   7  -3  -6   -8.90    8.30
  -7  -3   6   11.10   13.90
  -7   3  -6   -4.80    9.80
  -7   3  -6  -14.60   10.80
  -7   3   7   23.50   15.90
   7   3  -7   63.09   14.90
  -7  -3  -7   95.29   15.70
  -7   3   7   69.69   16.70
  -7   3  -7   54.69   13.50
   7  -3  -7   56.89   14.30
  -7   3  -7   69.59   14.60
   8  -3   0  525.85   94.79
   8   3   0  538.65   94.59
   8  -3   1  419.56   65.09
  -8  -3  -1  312.87   69.39
   8  -3   1  420.26   73.09
   8   3   1  379.86   64.89
   8   3   1  418.26   72.69
   8  -3  -1  318.57   69.89
  -8   3   2  163.08   32.60
  -8  -3  -2  210.88   35.50
  -8   3   2  228.08   36.40
  -8  -3  -2  237.38   36.10
  -8  -3   2  172.38   32.60
  -8  -3   2  245.18   36.70
  -8   3  -2  259.67   36.50
   8  -3  -2  237.18   32.80
  -8   3  -2  209.78   36.30
  -8   3  -2  249.38   37.10
   8   3  -3  165.38   32.80
  -8  -3  -3  200.58   35.50
  -8  -3  -3  175.58   34.30
  -8  -3  -3  184.38   35.30
  -8   3   3  175.38   35.70
  -8   3   3  215.28   36.30
   8  -3   3  179.78   34.00
  -8  -3   3  189.68   36.00
   8  -3  -3  222.58   33.50
  -8   3  -3  201.18   35.90
  -8   3  -3  188.78   36.10
  -8   3  -3  195.58   36.20
   8   3   3  194.58   34.00
  -8   3  -3  196.48   34.60
   8  -3   4  210.58   28.20
  -8   3   4  164.78   30.10
  -8   3   4  148.79   29.50
   8   3  -4  181.98   26.30
  -8  -3  -4  190.38   29.30
  -8  -3  -4  209.48   28.30
  -8  -3  -4  224.98   31.40
  -8   3   4  121.59   24.60
  -8   3  -4  208.58   29.90
  -8  -3   4  119.89   24.70
  -8   3  -4  177.58   28.00
  -8   3  -4  206.78   30.30
   8   3   4  156.68   26.90
   8  -3  -4  203.98   27.10
  -8  -3   4  174.38   29.70
  -8   3   5   46.10   16.20
  -8   3   5    6.00   15.10
  -8  -3  -5   23.10   14.70
  -8  -3   5   28.50   15.50
   8  -3  -5   30.30   11.50
  -8   3  -5   26.80   15.90
  -8   3  -5    9.70   13.10
  -8  -3   5   47.60    8.00
  -8   3  -5   24.40   13.30
   8   3  -6   58.79   11.10
  -8   3   6   23.10   13.90
  -8   3   6   30.40   11.30
  -8  -3  -6   30.80   14.00
  -8   3  -6   27.70   11.70
  -8  -3   6   17.50    4.90
   8  -3  -6   20.50   11.40
  -8   3  -6   29.00   13.80
  -8  -3   6   32.40   14.70
  -8   3   7   28.00   12.30
  -8   3   7   23.70    9.50
  -8  -3  -7   29.90    9.70
   8  -3  -7    8.80   10.30
  -8   3  -7   32.00    8.40
  -8   3  -7   32.70    9.50
  -9  -3   0   88.99   18.30
  -9  -3   0   63.09   18.80
  -9   3   0   83.39   19.20
  -9   3   1   66.79   20.60
   9  -3   1   65.39   13.50
  -9   3   1   79.29   12.40
  -9  -3  -1   63.49   17.80
  -9   3  -1   60.69   18.00
  -9  -3   1   63.59   17.50
   9   3   1   51.19   12.90
  -9  -3   1   78.99   19.80
  -9   3  -1   58.69   18.20
  -9  -3  -2   77.49   18.80
  -9  -3  -2   91.09   21.00
   9  -3   2  112.59   17.50
  -9   3   2   76.09   20.50
   9  -3  -2   78.19   16.00
  -9   3  -2  104.19   20.10
   9   3   2   91.79   17.40
  -9  -3   2   98.19   19.80
  -9  -3   2   92.19   15.80
  -9   3  -2   95.49   21.50
  -9   3  -2   67.49   20.10
  -9  -3  -3   59.69   15.80
  -9  -3  -3   53.49   14.00
   9  -3   3   36.90   11.90
  -9   3   3   41.10   16.00
   9   3  -3   50.89    9.90
  -9   3   3   30.50   16.50
  -9   3  -3   48.10   18.00
   9  -3  -3   47.00   10.70
  -9  -3   3   62.89   16.20
   9   3   3   49.50   11.60
  -9   3  -3   33.40   14.00
  -9   3  -3   43.10   15.80
  -9  -3  -4   85.59   20.90
  -9  -3  -4   77.29   20.80
  -9   3   4  135.49   25.00
   9  -3   4  109.89   19.80
  -9   3   4  104.09   22.70
   9   3  -4   90.79   17.50
  -9  -3  -4   77.59   18.90
  -9  -3   4   61.79   21.30
  -9   3  -4  131.49   23.90
  -9   3  -4   68.79   18.10
   9   3   4  119.99   20.00
  -9   3  -4   57.59   20.90
   9  -3  -4   97.49   18.00
  -9   3  -4  125.59   22.20
  -9   3   5   79.89   24.40
  -9   3   5   72.79   24.20
  -9  -3  -5  161.18   26.20
  -9  -3   5  126.89   25.70
  -9   3  -5  132.49   22.80
  -9   3  -5  110.29   23.70
   9  -3  -5  127.39   21.90
  -9   3  -5  100.29   24.00
  -9   3  -5  100.99   24.90
  -9   3   6   58.69   21.40
  -9  -3  -6   88.59   22.00
  -9   3   6   93.69   20.60
  -9   3  -6  139.29   21.10
   9  -3  -6   86.19   20.90
  -9   3  -6  135.79   22.00
  -9  -3   6   88.99   20.40
  -9  -3  -7   16.70    7.00
  -9   3   7    3.90    9.10
  -9   3  -7    8.30    6.90
   9  -3  -7    4.60    5.30
  -9   3  -7  -11.80    8.30
 -10   3   0   -9.70   13.50
 -10  -3   0  -13.20   10.80
 -10  -3   0  -13.50   10.20
 -10   3   1   60.79   19.80
 -10  -3  -1   55.39   17.00
  10  -3   1   61.19   11.10
 -10   3  -1   44.40   14.90
 -10  -3   1   58.39   16.40
  10   3   1   61.09   10.70
 -10   3  -1   37.50   16.40
 -10  -3   1   25.60   15.40
  10  -3   2    6.60    6.00
 -10   3   2   11.60   12.90
 -10   3   2   -0.90    3.40
 -10  -3  -2    9.40   12.40
 -10  -3  -2    6.90    8.80
 -10   3  -2  -12.20   12.00
  10  -3  -2    5.80    4.50
  10   3   2   -1.70    6.60
 -10  -3   2    3.00   12.50
 -10   3  -2   10.50   11.60
 -10   3  -2   10.60   10.90
 -10  -3  -3   92.99   19.90
  10   3  -3   53.29   13.70
 -10  -3  -3   56.49   17.10
  10  -3   3   78.39   16.20
 -10   3   3   88.49   20.50
 -10   3  -3   87.49   21.20
  10   3   3   65.79   15.60
  10  -3  -3   73.29   14.30
 -10  -3   3   95.89   20.30
 -10   3  -3   84.29   18.90
 -10   3  -3   97.29   20.90
 -10   3   4   33.00   16.90
 -10  -3  -4   74.39   17.50
  10  -3   4   52.99   13.80
  10   3  -4   43.50   10.90
 -10  -3  -4   62.69   15.90
 -10  -3   4   62.59   16.90
 -10   3  -4   40.00   16.40
  10   3   4   58.99   12.50
  10  -3  -4   41.70   11.20
 -10   3  -4   49.40   17.60
 -10   3  -4   48.30   15.20
 -10   3   5  108.19   21.00
 -10  -3  -5   80.99   22.10
  10   3  -5  108.49   18.60
 -10   3  -5  155.68   24.70
 -10   3  -5   62.19   20.00
  10  -3  -5   87.39   18.00
 -10   3  -5   84.09   20.50
 -10  -3   5   93.59   20.30
 -10  -3  -6   37.30   13.40
  10  -3   6   39.10   10.90
 -10   3   6   23.00   10.10
  10  -3  -6   32.80    9.60
 -10   3  -6   43.20   13.70
 -10   3  -6   33.80    9.50
 -10  -3   6   34.30   12.60
  11  -3   0  170.28   28.70
 -11   3   0  168.48   33.60
 -11  -3   0  143.29   33.30
 -11   3   1   27.40   18.10
 -11  -3  -1   43.80   15.30
 -11   3   1   20.70    5.30
 -11  -3   1   25.70   14.20
 -11   3  -1   47.90   15.80
 -11  -3   1   66.29   15.60
 -11  -3   1   23.70    5.60
 -11   3   2  237.18   44.60
 -11  -3  -2  212.28   43.30
  11  -3   2  245.58   41.70
 -11  -3  -2  261.27   44.80
 -11  -3   2  240.28   44.70
 -11   3  -2  242.88   45.80
  11  -3  -2  216.58   40.50
  11   3   2  257.37   41.60
 -11   3  -2  233.98   44.20
  11  -3   3   45.00   10.70
  11   3  -3   35.50    8.60
 -11  -3  -3   51.59   14.80
 -11   3   3   45.00   17.20
  11  -3  -3   33.50    9.10
  11   3   3   36.50   11.50
 -11  -3   3   61.79   16.70
 -11   3  -3   65.19   17.00
 -11   3  -3   23.70   13.80
 -11   3  -3   30.10   17.40
 -11  -3  -4   26.90   12.50
  11  -3   4   33.00    9.60
 -11  -3  -4   18.40   13.40
 -11   3   4   24.10   15.10
 -11  -3   4    8.30    9.80
 -11   3  -4   11.60   11.00
  11  -3  -4   24.00    7.50
  11   3   4   35.20    9.30
 -11   3  -4    3.30   14.90
 -11   3  -4   25.90   14.40
 -11   3   5   58.79   19.50
 -11  -3  -5  117.49   19.40
 -11  -3   5   74.69   17.50
 -11   3  -5  112.19   19.40
 -11   3  -5   79.29   18.10
 -11   3  -5   63.89   16.70
 -11  -3  -6   99.89   15.20
 -11   3   6   23.80   11.40
  11  -3   6   66.89   11.40
 -11   3  -6   38.30   11.50
 -11  -3   6   49.70   11.90
  11  -3  -6   62.49   12.10
 -12  -3   0   16.30   15.30
 -12   3   0   29.40   14.90
  12  -3   0   35.60    8.30
 -12  -3  -1   42.10   18.60
  12  -3   1   50.59   12.40
 -12  -3   1   54.99   17.30
 -12   3  -1   67.79   16.80
  12   3   1   66.69   12.30
 -12  -3   1   52.69   15.60
 -12   3   2    6.50   15.10
  12  -3   2   39.30    9.90
 -12  -3  -2   42.40   16.70
  12   3   2   30.50    9.40
 -12   3  -2   30.40   13.00
  12  -3  -2   20.90    7.40
 -12  -3   2   21.70   15.70
 -12  -3  -3    0.00   10.90
 -12  -3  -3   17.00   14.20
 -12   3   3    9.00   15.20
  12  -3   3   34.70    8.90
 -12   3  -3   21.30   11.50
 -12   3  -3   11.50   16.30
  12   3   3   26.80    8.70
 -12  -3   3   13.90   14.20
  12  -3  -3   23.10    6.60
 -12   3   4   25.20   11.00
 -12  -3  -4   50.89   11.60
 -12  -3  -4   25.50   12.00
 -12   3  -4   36.70   14.40
 -12   3  -4   -6.00    8.70
 -12  -3   4   17.60   12.40
 -12   3   5   28.00   10.00
 -12  -3  -5   38.30   12.20
 -12   3  -5   22.60    9.50
 -12  -3   5    6.10    6.90
 -12   3  -5   23.70    8.20
 -12  -3   5   26.10    9.00
 -13  -3   0   10.20   15.00
 -13   3   0   19.10   14.30
  13  -3   0   17.10    6.30
  13  -3   1   27.00    8.70
 -13  -3  -1   44.70   16.70
  13   3   1   35.00    8.60
 -13  -3   1   23.60   14.70
 -13   3  -1   13.00   15.80
 -13  -3   1   30.10   14.40
 -13  -3  -2   34.80   13.40
  13  -3   2   26.60    9.50
 -13   3  -2   17.30   17.50
 -13  -3   2   25.90   12.00
  13   3   2   37.90    9.60
 -13   3   3   18.60   13.70
 -13  -3  -3   44.60   12.80
 -13  -3   3   15.90   10.70
 -13   3  -3   29.80   16.30
 -13   3   4   -1.80   11.90
 -13  -3  -4   26.80   10.60
 -13   3  -4   -4.80    7.80
 -13  -3   4    8.20    7.90
 -13  -3   4   -2.20    5.80
 -13   3   5   11.30    7.10
 -13  -3   5    6.60    6.80
 -14   3   0   -4.50   13.40
 -14  -3   0  -10.60   12.80
 -14  -3   1    4.00   11.70
 -14   3  -1   10.60   15.30
 -14  -3  -2   -1.90   12.30
 -14  -3   2   -6.80   11.70
 -14   3  -2  -17.60   13.70
 -14  -3  -3    4.30   11.50
 -14  -3   3   -7.80    7.00
 -14  -3   3   22.50   11.80
 -14   3  -3  -15.60   12.30
 -14   3   4   56.89   10.60
 -14  -3  -4   44.00   10.10
 -14  -3   4   18.30    9.30
 -14   3  -4   29.70    9.90
 -15  -3   0   12.40   11.00
 -15   3   0   23.00   13.40
 -15   3  -1   34.70   15.10
 -15  -3  -2   19.40    9.60
 -15   3  -2    4.50    9.00
 -15  -3  -3   12.10   10.60
 -15  -3   3   18.60   10.80
 -15   3  -3   29.10    9.60
 -16  -3   0   -1.20    9.70
 -16  -3  -1    5.50    7.30
 -16   3  -1   -1.80    6.80
   0   4   0   79.19   15.10
   0  -4   0   75.09   15.20
   0  -4  -1   75.19   14.10
   0   4   1   49.20   14.20
   0  -4  -1   65.99   15.40
   0  -4   1   86.39   13.70
   0   4  -1   72.09   15.80
   0   4   1   68.39   14.10
   0   4   2  291.17   49.70
   0  -4  -2  270.17   50.19
   0  -4   2  281.67   48.30
   0   4   3   46.00   18.10
   0   4  -3   79.29   13.80
   0  -4  -3   92.49   18.20
   0  -4  -3   56.19   13.20
   0   4   4   31.80   17.00
   0   4   5  102.49   21.50
   0  -4   5   98.49   20.60
   0  -4  -5  101.39   21.30
   0  -4  -5  105.79   21.50
   0   4  -5   91.99   21.70
   0  -4  -5   98.59   21.50
   0   4  -5  106.89   21.70
   0   4  -5   85.89   20.80
   0   4   5  125.79   21.30
   0  -4  -6  150.08   25.40
   0  -4  -6  144.39   25.10
   0   4  -6   89.59   24.10
   0   4   6  102.39   24.20
   0  -4  -6  168.68   26.10
   0   4  -6  123.89   27.60
   0   4  -6  174.78   26.10
   0  -4   6   85.99   23.60
   0   4   6  123.99   24.30
   0  -4  -6   71.49   23.80
   0   4  -7   39.90   13.10
   0  -4  -7   22.90   12.50
   0   4   7   28.70   12.60
   0  -4  -7   27.30   11.90
   0   4  -7   21.20   12.80
   0   4  -8   14.90   10.20
   0   4  -8   20.20    7.50
   0  -4  -8   17.20    9.40
   0   4   8   21.10   10.20
   0  -4  -8    8.40    9.20
  -1   4   0 1723.23  285.67
  -1  -4   0 1690.13  285.27
   1  -4   0 1708.03  285.67
  -1   4   0 1699.63  284.77
   1   4   0 1692.63  285.37
  -1  -4  -1 1083.59  188.08
   1  -4   1 1132.59  187.98
  -1  -4  -1 1146.79  188.58
  -1   4   1 1112.49  189.18
  -1   4   1 1154.08  187.48
   1   4  -1 1080.69  187.18
   1   4   1 1129.99  188.28
   1  -4  -1 1119.29  187.38
  -1   4  -1 1059.19  188.08
  -1  -4   1 1128.09  187.18
   1  -4  -1 1154.08  188.68
   1   4   1 1129.49  188.78
   1  -4   2  186.98   35.40
   1   4  -2  181.38   31.80
  -1   4   2  167.18   33.40
  -1  -4  -2  217.38   35.20
   1  -4  -2  194.58   34.60
   1   4   2  195.88   34.80
   1  -4  -2  183.08   31.80
   1  -4  -2  169.88   33.10
  -1   4   3   16.00   12.60
   1   4  -3   19.00    7.10
   1  -4  -3   25.00   10.90
   1   4   3   12.90   13.00
   1  -4  -3   18.30    7.00
  -1   4   4  228.48   48.50
   1   4  -4  269.37   44.90
   1  -4  -4  264.37   44.70
   1   4   4  223.98   48.30
   1   4  -5  206.78   36.20
  -1  -4  -5  190.98   36.10
  -1   4   5  186.68   35.80
  -1   4   5  190.48   35.40
  -1  -4  -5  155.78   35.20
   1  -4   5  209.38   35.60
   1   4  -5  184.88   35.60
  -1  -4  -5  201.48   35.80
  -1   4  -5  161.88   35.30
  -1   4  -5  182.98   35.50
   1  -4  -5  182.38   35.50
  -1  -4   5  196.68   35.40
  -1   4  -5  195.28   36.20
   1   4   5  191.38   35.70
   1  -4  -5  214.08   36.40
  -1  -4   5  217.68   37.00
   1  -4  -5  217.08   36.60
   1   4   5  203.68   35.90
  -1  -4  -6   27.50   13.20
   1   4  -6   15.50   12.80
  -1  -4  -6   46.80   13.30
  -1  -4  -6   32.20   13.20
  -1  -4  -6   30.50   15.20
  -1   4   6   42.10   13.60
   1   4  -6   33.20   12.80
   1  -4   6   42.60   13.10
  -1   4   6   51.19   13.00
   1   4   6   50.79   11.60
   1   4   6   29.60   12.30
  -1   4  -6   48.50   16.00
   1  -4  -6   42.60   12.30
  -1  -4   6   41.20   12.90
  -1   4  -6   39.20   13.50
  -1  -4   6   24.10   14.80
   1  -4  -6   38.80   14.00
  -1   4  -6   12.40   12.90
   1  -4  -6   27.10   13.10
  -1  -4  -7   69.49   15.80
   1   4  -7   85.99   16.80
  -1  -4  -7   37.20   14.20
   1   4  -7   48.90   15.00
  -1   4   7   52.39   15.80
  -1   4  -7   33.20   15.30
   1   4   7   56.99   13.60
   1  -4  -7   42.20   14.50
  -1   4  -7   40.40   16.10
   1  -4  -7   60.99   16.10
  -1   4  -7   54.89   13.50
   1   4  -8    1.10    8.90
  -1  -4  -8   14.20    8.90
  -1   4   8   -3.70    9.40
   1   4  -8   -2.10    8.40
  -1  -4  -8   22.40    7.00
  -1   4  -8    2.80    9.50
   1  -4  -8   11.00    8.90
  -1   4  -8   -2.80    9.00
  -1   4  -8    4.90    6.30
   1   4   8    7.20    6.20
   2  -4   0    1.40    6.70
  -2   4   0    4.90    2.90
  -2   4   0   -9.10    7.20
   2   4   0    9.10    5.70
   2  -4   1  844.22  145.99
   2   4  -1  874.71  144.49
   2  -4   1  910.31  145.69
   2  -4  -1  885.91  146.39
   2  -4  -1  858.91  144.49
   2   4   1  794.92  146.19
  -2   4  -1  853.91  145.69
   2   4  -2   61.79   11.90
   2  -4   2   65.09   12.10
   2  -4   2   54.39   14.90
   2  -4  -2   57.79   13.20
   2  -4  -2   54.19   11.80
   2   4   2   73.29   12.30
   2  -4  -2   71.39   15.80
   2   4   2   50.39   15.00
   2  -4   3  348.17   52.19
   2  -4   3  267.47   46.50
   2  -4  -3  276.77   49.70
   2   4   3  244.98   49.70
   2   4   3  256.37   46.50
   2  -4  -3  273.07   46.40
   2  -4   4  117.69   31.30
   2   4  -4  182.38   27.20
   2  -4  -4  108.19   29.90
   2   4   4   98.09   30.10
   2  -4  -4  155.98   26.60
   2   4  -5  134.79   22.90
  -2  -4  -5  132.89   23.10
   2   4  -5   94.09   20.00
  -2   4   5  109.29   21.40
   2  -4   5  101.89   21.30
  -2   4   5   83.39   21.50
   2   4  -5   97.59   21.50
  -2  -4  -5  118.19   21.70
  -2  -4  -5   95.29   22.10
  -2   4   5   97.59   21.20
  -2  -4   5  113.89   21.90
   2  -4  -5   90.39   21.10
   2   4   5   97.79   21.00
  -2   4  -5  104.79   21.90
   2   4   5   85.49   21.10
   2  -4  -5  122.39   22.10
  -2   4  -5  109.59   23.00
   2  -4  -5  115.19   22.10
  -2  -4   5  106.89   21.30
  -2   4  -5   86.69   21.00
   2  -4   6   79.19   16.30
   2   4  -6   58.59   15.80
  -2   4   6   55.69   14.40
  -2  -4  -6   65.69   15.70
   2   4  -6   51.29   15.30
  -2  -4  -6   70.99   14.30
  -2   4   6   68.39   16.30
  -2  -4  -6   43.00   15.20
  -2   4   6   46.50   16.00
   2  -4  -6   83.59   17.70
   2   4   6   48.20   14.80
  -2   4  -6   48.20   15.50
  -2  -4   6   54.19   16.00
  -2   4  -6   65.79   16.50
   2  -4  -6   24.80   13.40
  -2   4  -6   54.39   16.20
   2   4   6   55.39   15.30
  -2  -4   6   57.19   14.90
   2  -4  -6   49.99   15.20
  -2  -4  -7   46.40   15.70
  -2   4   7   56.69   17.60
   2   4  -7   86.29   17.20
  -2  -4  -7   85.99   17.30
   2   4  -7   76.99   16.60
  -2   4  -7   58.49   17.90
   2   4   7   57.39   15.80
   2  -4  -7   46.80   14.80
  -2   4  -7   86.49   17.70
  -2  -4   7   82.79   16.90
  -2   4  -7   45.10   15.90
   2  -4  -7   62.99   17.20
  -2  -4  -8  -11.00    4.70
   2   4  -8  -13.90    8.60
  -2  -4  -8   -3.30    8.30
  -2   4   8   -1.60    5.90
   2   4  -8   13.30    8.10
  -2   4  -8    5.60    8.70
  -2   4  -8    9.00    6.40
  -2   4  -8   -4.30    6.40
   2  -4  -8   -4.20    8.60
   3  -4   0 2130.29  349.77
   3  -4   0 2094.49  348.17
   3   4   0 2022.70  349.07
   3   4  -1  146.09   27.50
   3  -4   1  192.18   30.80
   3  -4   1  151.78   27.50
   3  -4   1  176.78   29.30
   3   4   1  169.58   30.70
   3  -4  -1  176.18   30.90
   3   4   1  157.38   27.40
  -3   4  -1  167.58   29.60
   3  -4   2  154.78   27.90
   3   4  -2  169.38   27.60
   3  -4   2  133.29   30.20
   3  -4  -2  161.68   27.80
   3  -4  -2  184.78   31.50
   3   4   2  182.28   32.10
   3   4   2  150.48   27.90
   3  -4  -2  150.48   28.70
   3  -4   3 1049.79  170.98
   3   4  -3 1057.49  170.78
   3  -4   3  935.11  173.48
   3   4   3  968.60  170.88
   3   4   3  990.20  173.78
   3  -4  -3 1022.20  170.78
   3  -4  -3 1067.59  173.68
   3  -4   4   18.50   16.60
  -3  -4  -4   23.70   12.20
  -3   4   4   24.00   14.80
  -3   4  -4   21.30   13.20
   3   4   4   10.40   14.10
   3  -4  -4   23.10    8.10
  -3   4   5   33.70   12.30
  -3   4   5   45.70   14.30
   3  -4   5   34.40   12.90
   3   4  -5   34.20   14.00
   3   4  -5   67.29   14.00
  -3   4   5   47.20   11.80
  -3  -4  -5   34.30   12.50
   3  -4   5   45.90   13.30
  -3  -4  -5   51.89   13.30
   3   4  -5   53.89   12.50
  -3  -4  -5   38.30   13.20
  -3  -4   5   42.40   11.50
   3   4   5   42.70   13.50
  -3   4  -5   37.00   13.40
  -3   4  -5   50.09   15.10
   3  -4  -5   34.40   11.50
   3   4   5   53.99   13.60
   3  -4  -5   30.10   13.00
  -3   4  -5   45.90   11.70
  -3   4  -5   49.80   14.10
   3  -4  -5   34.70   11.70
  -3  -4   5   54.29   14.10
  -3   4   6   95.39   25.20
   3   4  -6  129.39   25.10
  -3   4   6  131.99   24.30
  -3  -4  -6  138.39   25.70
   3  -4   6  104.79   25.10
  -3   4   6  152.58   26.00
  -3  -4  -6  145.29   25.00
   3   4  -6  126.99   26.10
  -3  -4  -6   75.69   23.90
  -3   4  -6  137.99   26.90
  -3   4  -6  100.99   24.80
   3   4   6  136.59   24.60
   3  -4  -6   95.99   23.70
  -3  -4   6  122.69   25.60
   3   4   6  153.38   25.80
  -3   4  -6   89.39   24.60
   3  -4  -6  157.78   26.60
   3   4  -7   12.20    7.60
   3   4  -7   -6.30   10.80
  -3  -4  -7   26.40   11.90
  -3   4   7    7.50    9.40
  -3  -4  -7    7.90    7.00
  -3   4  -7    5.80   12.00
   3   4   7   20.60   10.30
  -3   4  -7   -1.20   10.50
  -3  -4   7   13.80   11.30
   3  -4  -7   21.60    9.20
   3  -4  -7   17.50    9.10
  -3   4  -7    0.60   10.60
   3   4  -8    9.40    9.70
   3   4  -8   14.60    8.20
  -3  -4  -8   -1.20    7.00
  -3  -4  -8   24.20    7.70
  -3   4   8   54.09    9.80
   3  -4  -8   16.60    7.50
  -3   4  -8  -15.40    9.00
  -3   4  -8   25.30    6.90
   4   4   0 2501.25  414.56
   4  -4   0 2433.46  412.96
   4  -4   0 2480.15  414.46
   4  -4   1  441.96   71.79
   4  -4   1  433.96   73.19
   4   4  -1  397.06   70.89
   4  -4   1  411.96   70.19
   4  -4  -1  406.16   69.99
   4  -4  -1  406.16   70.29
   4  -4  -1  447.96   70.39
   4  -4  -1  430.86   73.09
   4   4   1  414.26   73.79
   4   4   1  414.56   70.19
   4  -4   2  506.35   84.99
   4  -4   2  474.45   82.29
   4   4  -2  520.85   81.99
   4  -4  -2  495.85   82.09
   4   4   2  450.45   82.19
   4   4   2  512.85   86.39
   4  -4  -2  453.05   84.99
   4  -4   3   49.99   17.90
   4  -4   3   39.00   11.20
   4   4  -3   58.39   10.60
   4  -4  -3   57.39   11.50
   4  -4  -3   41.30   15.50
   4   4   3   46.10   16.60
   4   4   3   53.49   11.40
  -4  -4  -4   39.70   11.20
  -4   4   4   37.10   11.80
  -4   4   4   24.70    9.90
   4  -4   4   40.00   10.60
   4   4  -4   23.50    8.90
  -4   4   4   42.90   12.60
  -4   4  -4   54.29   12.40
  -4  -4   4   48.90   13.20
  -4   4  -4   20.60   11.30
  -4  -4   4   26.40   10.50
   4   4   4   34.20   10.40
  -4   4  -4   18.50   10.30
   4  -4  -4   46.20   10.00
   4   4  -5  131.59   25.80
  -4   4   5  138.89   24.80
  -4   4   5  123.09   26.00
   4   4  -5  130.19   26.60
  -4  -4  -5  184.38   26.40
  -4  -4  -5  147.59   25.70
   4   4  -5  122.29   24.20
  -4   4   5  157.28   27.40
  -4  -4  -5  136.29   25.80
  -4  -4   5  140.79   26.80
  -4  -4   5  120.29   22.50
   4   4   5  169.78   27.00
  -4  -4   5  149.79   28.50
   4  -4  -5  132.89   25.50
  -4   4  -5  107.89   24.80
  -4   4  -5  134.59   25.90
   4  -4  -5   93.79   24.80
  -4   4  -5   94.59   25.40
   4  -4  -5  151.18   25.60
  -4   4  -5  146.49   26.50
   4   4  -6   83.49   20.70
   4   4  -6  113.09   22.00
  -4   4   6   89.39   23.10
  -4   4   6  146.29   23.20
  -4  -4  -6   99.39   21.40
   4   4  -6  118.79   23.70
  -4  -4  -6  108.69   22.20
  -4  -4  -6  110.39   21.30
  -4   4   6  117.99   20.60
  -4  -4   6   83.59   21.90
   4  -4  -6  105.09   21.20
  -4   4  -6   45.40   19.30
  -4   4  -6  100.69   23.30
   4  -4  -6   83.89   20.90
  -4   4  -6   66.69   21.30
   4  -4  -6  113.39   23.20
   4   4   6  115.49   21.70
  -4   4  -6  115.89   22.50
  -4   4   7   33.60   15.20
   4   4  -7   37.60   14.00
  -4  -4  -7   35.50   11.00
  -4   4   7   77.49   16.20
  -4  -4  -7   45.20   14.70
   4   4  -7   66.29   13.70
   4  -4  -7   46.80   15.40
  -4   4  -7   27.20   13.80
   4  -4  -7   76.19   15.80
  -4  -4   7   39.50   14.90
  -4   4  -7   40.30   15.20
   4   4  -8   -3.70    6.10
  -4  -4  -8   -1.90    5.60
  -4   4   8   18.30    9.70
   4   4  -8    0.20    8.40
  -4  -4  -8   -1.20    8.40
   4  -4  -8    5.20    6.00
  -4   4  -8   -6.20    6.90
  -4   4  -8  -11.10    8.30
   5   4   0   57.69   18.10
   5  -4   0   70.79   19.00
   5  -4   0   91.89   15.60
   5  -4   1  329.17   59.89
   5  -4   1  295.97   57.59
   5  -4   1  336.17   55.89
   5  -4  -1  340.17   56.39
   5  -4  -1  334.97   59.59
   5   4   1  327.97   55.69
   5   4   1  345.17   59.89
   5  -4   2  239.18   39.90
   5   4  -2  235.08   39.30
   5  -4   2  214.98   42.70
   5  -4  -2  230.58   44.00
   5   4   2  218.88   39.80
   5   4   2  230.68   45.10
   5  -4  -2  236.88   39.50
   5   4  -3   33.70    7.30
   5  -4   3   32.70   15.80
   5  -4   3   29.20    8.80
   5  -4  -3   22.80    7.80
   5  -4  -3   31.20   13.40
   5   4   3   32.50    8.60
   5   4   3   34.20   14.90
   5   4  -4   83.99   16.40
  -5   4   4   81.69   16.30
  -5   4   4   89.79   19.70
   5  -4   4  105.09   17.60
  -5  -4  -4   67.79   18.40
   5   4  -4   63.39   19.40
  -5   4   4   82.89   18.60
  -5  -4  -4   82.99   19.10
  -5   4  -4   84.89   19.10
   5   4   4   67.79   16.20
  -5  -4   4   98.89   19.70
  -5   4  -4  115.39   19.60
  -5   4  -4   76.89   18.00
  -5  -4   4   71.89   17.70
   5  -4  -4   93.39   19.00
  -5   4  -4   67.99   17.40
   5  -4  -4   75.49   16.70
   5   4   4   97.69   18.10
  -5  -4  -5  115.99   25.70
  -5  -4  -5  141.19   25.60
  -5   4   5   90.39   26.10
   5   4  -5  122.69   24.80
   5   4  -5  121.69   25.60
  -5   4   5  105.29   26.00
  -5   4   5  120.69   24.10
  -5  -4  -5  127.59   25.40
  -5   4   5  143.89   21.80
   5   4  -5  107.59   25.20
  -5  -4   5  127.49   22.10
   5  -4  -5  151.98   25.50
  -5   4  -5   94.89   25.10
   5  -4  -5  114.19   25.40
  -5  -4   5  133.19   27.20
  -5   4  -5   80.29   25.40
  -5  -4   5  113.19   26.00
   5  -4  -5  153.88   26.40
  -5   4  -5  128.09   26.10
   5   4  -6   23.60   13.20
  -5   4   6   54.29   12.60
  -5   4   6   35.40   15.10
  -5  -4  -6   41.20   14.00
  -5  -4  -6   32.50   12.20
  -5   4   6   29.90   16.00
  -5  -4  -6   48.50   15.30
   5   4  -6   34.20   13.30
   5   4  -6   52.69   14.80
   5  -4   6   56.29   14.00
   5  -4  -6   38.20   12.60
   5  -4  -6   53.29   13.90
   5  -4  -6   55.79   13.80
  -5  -4   6   58.39   16.40
  -5   4  -6   42.80   15.40
  -5   4  -6   67.09   15.70
  -5   4  -6   57.49   15.50
  -5   4   7   31.70   14.50
  -5   4   7   35.40   14.30
  -5  -4  -7   44.80   11.20
   5   4  -7   41.90   11.20
   5   4  -7   38.10   12.40
  -5  -4  -7   36.90   13.00
  -5   4  -7   13.10   11.00
  -5   4  -7   29.70   11.90
   5  -4  -7   35.70   13.90
   5   4  -8    6.00    8.10
  -5   4   8    9.40    6.60
  -5  -4  -8    6.80    8.70
   5  -4  -8   13.10    8.70
  -5   4  -8   25.40    9.10
  -5   4  -8    4.60    5.30
   6   4   0  166.08   32.50
   6  -4   0  153.28   29.00
   6  -4   0  157.98   32.40
   6  -4   1  634.84  103.59
   6  -4   1  599.04  107.59
   6  -4   1  550.84  105.59
   6   4  -1  637.84  105.79
   6   4   1  639.74  107.59
   6   4   1  621.64  103.39
   6  -4  -1  593.34  107.49
   6  -4   2  114.19   25.20
   6  -4   2  113.49   20.70
   6   4  -2  106.99   19.60
   6  -4   2  133.69   27.40
   6  -4  -2  138.99   26.40
   6   4   2  128.19   21.00
   6   4   2  116.89   27.00
   6  -4  -2  113.09   20.20
   6  -4   3   -3.30   15.60
   6   4  -3   25.10    5.90
  -6   4   3   35.80   10.80
   6  -4   3   28.50    7.70
  -6  -4   3    2.90   11.10
   6  -4  -3   10.80    7.00
   6   4   3    1.10    6.70
  -6  -4   3   15.80   10.20
  -6   4  -3    7.80    9.70
  -6   4  -3   31.80   15.40
  -6   4   4   16.40    8.20
  -6  -4  -4   -1.50    7.70
   6  -4   4    7.60    8.20
  -6   4   4    1.90   11.70
   6   4  -4   -1.10    5.90
  -6  -4  -4   24.30    9.80
  -6   4   4    5.80    7.10
  -6   4  -4   11.90   11.20
  -6   4  -4   -0.70   10.40
  -6   4  -4    2.80    9.90
  -6  -4   4   21.10   10.10
   6   4   4    7.00    8.20
  -6   4  -4   -3.00   10.30
   6  -4  -4    9.20    7.50
  -6  -4   4   -3.40   11.30
   6   4  -5   80.29   15.50
  -6   4   5   72.09   19.50
  -6   4   5   53.59   18.50
  -6  -4  -5   53.59   15.90
  -6  -4  -5   60.19   16.10
  -6  -4  -5   71.59   18.00
  -6   4   5   56.89   14.70
   6   4  -5   97.99   18.20
  -6  -4   5   64.19   19.10
  -6   4  -5   92.79   18.10
   6  -4  -5   60.49   17.00
   6  -4  -5   87.99   17.60
  -6   4  -5   71.29   18.10
  -6  -4   5   79.99   18.30
  -6   4  -5  100.99   19.30
   6  -4  -5   87.49   16.70
  -6   4   6   33.80   17.70
  -6  -4  -6   78.79   15.20
  -6  -4  -6   69.39   18.20
   6   4  -6   39.10   15.00
   6   4  -6   60.59   15.10
  -6  -4  -6   43.10   14.30
   6  -4   6   71.79   16.30
  -6   4   6   51.69   14.90
   6   4  -6   70.29   16.30
  -6   4   6   66.49   18.00
  -6   4  -6   74.29   17.30
  -6   4  -6   87.09   16.00
   6  -4  -6   94.89   17.50
  -6  -4   6   99.29   18.90
  -6   4  -6   75.69   17.20
   6  -4  -6   44.10   15.50
  -6  -4   6   69.89   16.50
  -6   4   7  -14.70   11.80
   6   4  -7    2.90    9.40
  -6  -4  -7   11.30    9.50
  -6   4   7  -14.60   11.00
  -6  -4  -7   12.20   11.20
  -6   4  -7   14.40   11.20
  -6   4  -7    2.80    9.40
  -6   4  -7   -4.20    6.00
   6  -4  -7    7.80    8.20
  -6   4   8   -1.50    5.50
  -6  -4  -8    6.10    8.00
   6   4  -8    2.90    5.20
   6  -4  -8    9.30    7.40
  -6   4  -8    5.40    6.50
  -6   4  -8   -9.60    6.70
   7  -4   0  126.39   28.00
   7   4   0  121.89   27.40
   7  -4   1  926.31  149.69
   7   4  -1  821.02  148.79
   7  -4   1  887.81  144.79
   7  -4  -1  877.41  148.89
   7   4   1  834.52  144.59
   7   4   1  858.31  148.99
   7  -4   2  112.99   18.20
   7  -4   2  100.09   25.70
   7  -4   2   81.59   23.40
   7   4  -2   95.29   16.80
   7  -4  -2   99.69   24.70
   7   4   2   94.69   25.80
   7  -4  -2   95.19   17.60
   7   4   2   94.29   18.00
  -7  -4  -3  116.49   24.90
   7   4  -3  106.39   22.70
  -7  -4  -3   87.99   23.30
  -7   4   3  144.79   21.80
  -7  -4  -3   96.09   24.60
  -7   4   3  113.69   25.90
  -7   4   3  111.69   25.90
  -7  -4  -3  119.59   25.70
   7  -4   3   82.09   23.10
  -7   4  -3  100.49   23.80
  -7  -4   3  150.48   21.90
   7  -4  -3  113.19   23.30
  -7   4  -3  131.69   26.20
   7   4   3  103.59   23.50
  -7  -4   3  131.19   25.00
  -7   4  -3  122.99   26.60
  -7   4  -3  117.89   25.90
  -7   4   4   96.49   28.60
  -7  -4  -4  187.98   29.40
  -7   4   4  123.59   29.10
  -7   4   4  147.79   24.80
  -7  -4  -4  134.09   27.10
   7  -4   4  138.39   27.20
   7   4  -4  110.39   26.00
  -7   4  -4  120.59   29.10
  -7  -4   4  176.48   30.20
   7   4   4  154.68   27.80
  -7   4  -4  150.08   29.40
  -7   4  -4  148.99   27.90
  -7  -4   4  143.39   29.00
   7  -4  -4  174.88   27.20
  -7  -4   4  150.98   24.90
  -7   4  -4  135.29   28.60
  -7   4   5   71.39   24.50
  -7  -4  -5   81.59   21.70
  -7  -4  -5  111.29   23.70
  -7   4   5   69.39   23.70
   7   4  -5   81.39   21.20
  -7   4   5  123.19   18.80
  -7  -4   5   94.39   24.10
  -7  -4   5  116.59   19.10
  -7   4  -5  104.89   23.70
  -7   4  -5  104.29   24.50
  -7  -4   5   57.69   23.10
  -7   4  -5  145.29   25.40
   7  -4  -5   59.39   21.80
   7  -4  -5   99.59   21.00
  -7   4   6  191.18   33.10
  -7   4   6  137.99   33.60
  -7  -4  -6  229.18   33.80
   7   4  -6  195.68   32.20
   7  -4   6  136.49   32.00
   7   4  -6  180.38   32.60
   7  -4  -6  166.78   31.80
   7  -4  -6  186.48   32.90
  -7   4  -6  134.89   32.10
  -7  -4   6  177.98   33.00
  -7   4   7    7.80    8.30
  -7  -4  -7   29.70   11.70
  -7   4   7   13.50   11.50
   7   4  -7   23.10    9.40
  -7   4  -7   16.10    7.60
   7  -4  -7   -2.30    8.20
  -7   4  -7   23.70    8.70
   7  -4  -7   11.00    8.50
  -7   4  -7   13.30    6.80
   8  -4   0   75.89   25.80
   8   4   0  103.39   26.40
   8  -4   0  116.59   19.40
   8   4  -1  535.45   93.39
  -8  -4  -1  488.85   89.29
   8  -4   1  545.05   87.79
  -8  -4  -1  671.83   91.29
   8   4   1  611.74   96.39
   8   4   1  503.45   87.59
  -8   4  -1  539.05   89.59
  -8   4  -1  490.35   89.59
   8  -4  -1  338.17   91.59
  -8   4   2  437.46   69.79
  -8  -4  -2  392.46   69.49
   8  -4   2  408.46   67.99
  -8  -4  -2  369.26   69.09
  -8  -4  -2  371.06   69.39
  -8   4  -2  418.36   69.79
  -8   4  -2  389.86   69.69
   8   4   2  414.36   68.09
  -8  -4   2  390.26   69.19
   8  -4  -2  402.66   67.49
  -8   4  -2  432.56   70.19
   8  -4  -2  315.37   73.39
   8  -4   3   27.40    8.70
  -8  -4  -3   13.80    9.80
   8   4  -3   16.20    6.10
  -8  -4  -3    7.40   10.70
  -8   4   3   14.30   12.40
  -8  -4  -3   21.40    8.80
  -8   4   3   28.20   15.00
   8   4   3   16.60    7.70
  -8   4  -3   17.10    9.80
  -8   4  -3    9.10   11.60
   8  -4  -3   34.00    7.70
  -8  -4   3   26.20   12.10
  -8   4  -3    8.30   10.90
  -8   4  -3   18.80   12.20
   8   4  -4   24.90    8.20
  -8  -4  -4   38.10   12.60
  -8   4   4   45.20   14.70
  -8  -4  -4   24.90   12.10
  -8  -4  -4   29.40   11.20
  -8   4   4   37.40   14.90
   8  -4   4   14.80    9.30
  -8   4  -4   49.60   14.80
   8   4   4   28.80    9.60
  -8  -4   4   31.80   13.80
   8  -4  -4   27.40    9.50
  -8   4  -4   16.20   12.30
  -8   4  -4   37.60   13.30
  -8   4  -4   21.00   13.50
   8   4  -5   -7.90    8.60
  -8   4   5   10.50   13.00
  -8   4   5  -12.00   13.00
  -8  -4  -5    9.50    9.30
  -8  -4  -5   -3.40   11.80
  -8   4  -5   -6.20   10.40
   8  -4  -5   20.30    8.80
  -8  -4   5   19.00   13.00
  -8   4  -5   -0.30    9.90
  -8   4  -5    1.70   12.80
  -8   4  -5    2.70   10.70
   8   4  -6   79.49   15.00
   8  -4   6   14.30   13.00
  -8   4   6   50.99   14.20
  -8   4   6   82.29   15.00
  -8  -4  -6   66.99   16.90
  -8   4  -6   43.90   16.20
   8  -4  -6   44.60   13.30
  -8   4  -6   32.90   13.70
  -8   4  -6   53.39   14.20
  -8  -4   6   48.00   13.50
  -8  -4  -7   15.40    8.30
  -8   4   7    6.00   10.20
  -8   4   7   11.60    8.00
  -8   4  -7   16.60    9.50
   8  -4  -7   -2.00    9.10
  -8   4  -7   12.40    8.80
  -8   4  -7   10.20    6.20
   9  -4   0  246.38   39.80
  -9  -4   0  237.78   42.80
  -9   4   0  229.48   42.70
  -9  -4   0  203.88   42.30
   9  -4   1   29.30    6.60
  -9  -4  -1   19.30   11.80
  -9   4  -1   22.10   11.10
  -9  -4   1   23.00   11.80
  -9  -4   1   21.20   11.80
   9   4   1   20.00    5.80
  -9   4  -1   29.90   12.70
  -9  -4  -2  264.97   45.60
  -9  -4  -2  205.38   44.60
   9  -4   2  262.87   43.50
  -9   4   2  236.88   45.80
  -9   4  -2  210.48   45.40
  -9   4  -2  216.48   45.70
   9   4   2  278.47   43.40
  -9   4  -2  263.37   46.00
   9  -4  -2  263.27   42.70
  -9  -4   2  266.27   46.10
  -9  -4  -3   42.90   12.10
   9  -4   3   26.90   10.20
   9   4  -3   27.30    7.90
  -9  -4  -3   26.90   13.00
  -9   4   3   30.60   14.80
  -9  -4   3   33.00   14.00
  -9   4  -3   44.50   13.80
   9   4   3   33.40    9.80
   9  -4  -3   30.10    8.90
  -9   4  -3   30.60   15.10
  -9   4  -3   49.10   14.70
  -9   4   4   77.79   25.70
  -9  -4  -4  126.19   25.60
  -9   4   4  124.19   26.60
   9   4  -4  131.49   22.50
   9  -4   4   96.89   23.70
  -9  -4  -4  118.59   25.70
  -9  -4  -4  125.59   23.10
   9  -4  -4  128.39   23.00
  -9  -4   4   94.89   25.50
  -9   4  -4  160.68   27.00
   9   4   4  112.49   23.90
  -9   4  -4  143.69   24.60
  -9   4  -4  174.38   28.40
  -9   4  -4   92.79   25.90
  -9  -4  -5   -4.40   12.30
   9   4  -5    3.70    7.10
  -9   4   5   -9.20   12.80
  -9   4   5   13.00   14.10
   9  -4  -5   12.20    6.70
  -9   4  -5    9.60   10.80
  -9  -4   5   -3.80   12.70
  -9   4  -5   10.40   11.10
  -9   4  -5  -13.50   13.20
  -9   4  -5   14.10    9.50
  -9   4   6   13.00   12.30
   9  -4   6   23.30    8.60
  -9  -4  -6   36.70   11.00
  -9   4   6   19.30   10.60
  -9  -4   6   15.80    9.80
  -9   4  -6   35.60   11.50
  -9   4  -6   32.30   10.30
  -9   4  -6   29.80   14.00
  -9  -4  -7   78.39   12.20
  -9   4   7   22.60   11.90
   9  -4  -7   56.59   10.60
  -9   4  -7   24.80   10.40
 -10  -4   0   56.29   18.00
 -10  -4   0   83.69   19.50
 -10   4   0   89.09   21.10
  10  -4   0   75.09   13.80
 -10  -4  -1  210.88   36.60
  10  -4   1  227.38   33.20
 -10  -4   1  174.98   36.20
 -10   4  -1  146.59   35.90
  10   4   1  189.68   32.80
 -10   4  -1  200.28   35.80
  10  -4  -1  180.18   32.30
 -10  -4   1  172.18   35.90
  10  -4   2   84.09   15.40
 -10  -4  -2   41.50   15.80
 -10   4   2   82.69   19.80
 -10  -4  -2   67.89   19.50
  10  -4  -2   83.19   14.30
 -10   4  -2   62.29   18.20
  10   4   2   81.79   15.10
 -10   4  -2   72.09   20.20
 -10  -4   2   79.49   17.60
  10   4  -3   92.99   17.00
 -10   4   3  103.79   21.20
 -10  -4  -3  101.09   20.80
  10  -4   3   88.19   18.20
 -10  -4  -3   74.99   21.60
  10  -4  -3   95.89   17.60
 -10  -4   3   99.89   22.40
 -10   4  -3   82.39   21.20
 -10   4  -3   92.59   23.40
  10   4   3   89.99   18.70
 -10   4  -3   71.79   22.10
 -10  -4  -4    6.50   10.90
  10  -4   4   -2.80    7.50
 -10   4   4   18.60   13.90
 -10  -4  -4  -10.50   10.60
 -10   4  -4   -4.80   10.60
  10   4   4    8.00    7.90
 -10   4  -4   12.70   14.70
 -10  -4   4    9.00   12.40
 -10   4  -4    6.90   13.60
  10  -4  -4    8.60    6.70
 -10   4   5   20.00   14.90
 -10  -4  -5   51.59   12.90
  10   4  -5   46.70   10.40
  10  -4  -5   28.10    9.40
 -10   4  -5   20.40   14.00
 -10   4  -5   47.30   16.90
 -10   4  -5   22.30   12.50
 -10  -4   5   40.10   12.50
 -10   4  -5   45.40   13.40
 -10  -4  -6   -7.90    7.40
  10  -4   6    3.60    5.70
 -10   4   6   17.50   11.60
 -10   4  -6   -0.90    7.50
  10  -4  -6    2.10    6.70
 -10  -4   6  -14.40    7.10
 -10   4  -6   -2.40    8.20
 -10  -4   6    2.50    7.10
  11  -4   0  213.68   39.00
 -11   4   0  192.58   42.70
 -11  -4   0  253.97   44.20
 -11  -4   0  281.07   43.70
 -11  -4  -1   -2.70   13.00
  11  -4   1   17.30    6.70
 -11  -4   1    7.70   13.00
 -11  -4   1   -7.60   12.90
 -11   4  -1   13.10   13.90
  11   4   1   13.80    5.70
  11  -4  -1   10.30    5.10
 -11   4   2   81.99   22.50
 -11  -4  -2   76.79   21.50
 -11  -4  -2   98.49   23.30
  11  -4   2   93.39   18.70
  11   4   2  131.89   18.60
 -11   4  -2   76.29   23.40
  11  -4  -2   84.69   17.00
 -11  -4   2   78.79   22.30
 -11   4  -2   91.89   21.70
  11  -4   3   33.40   10.50
 -11   4   3   51.69   17.70
 -11  -4  -3   52.79   16.40
 -11  -4  -3   25.10   12.40
 -11   4  -3   63.39   18.40
  11   4   3   48.90   11.70
  11  -4  -3   37.10    9.30
 -11   4  -3   18.70   13.40
 -11  -4   3   42.90   12.70
  11  -4   4   32.10   11.70
 -11  -4  -4   40.80   11.60
 -11  -4  -4   25.20   12.20
  11   4  -4   36.00    8.70
 -11   4   4   36.60   16.00
 -11   4  -4   30.90   12.60
 -11  -4   4   32.30   11.20
  11   4   4   26.70    9.50
 -11   4  -4    3.70   14.60
 -11   4  -4   28.30   16.40
  11  -4  -4   23.50    8.30
 -11  -4  -5    5.70   11.40
 -11   4   5    1.70   12.20
 -11  -4   5   -0.30    4.50
 -11   4  -5   -2.30    9.20
 -11   4  -5   -6.40    8.80
 -11  -4   5  -14.00    7.10
  11  -4   6    1.90    6.70
 -11   4   6   -3.80    6.30
 -11  -4  -6    4.50    6.70
 -11   4  -6    3.50    6.60
 -11  -4   6   -0.70    5.80
  11  -4  -6    9.40    7.10
 -12  -4   0   64.89   19.40
 -12   4   0   47.90   18.40
  12   4   0   66.89   12.70
  12  -4   0   69.99   13.10
  12  -4   1   17.10    7.40
 -12  -4  -1   29.40   15.70
  12   4   1   19.60    7.10
 -12  -4   1    6.40   13.00
  12  -4  -1   17.20    5.90
 -12   4  -1   21.00   15.30
 -12  -4   1    8.20   14.40
 -12  -4  -2  118.29   31.20
  12  -4   2  170.98   28.60
 -12   4   2  108.39   31.10
 -12   4  -2  141.09   32.70
 -12  -4   2  176.08   30.60
  12   4   2  164.18   28.30
  12  -4  -2  163.88   27.50
  12  -4   3   17.50    9.80
 -12   4   3    9.30   14.70
 -12  -4  -3   11.00   10.30
  12   4  -3   20.20    6.90
 -12  -4  -3   16.00   13.90
 -12  -4   3    4.20   13.00
 -12   4  -3   16.30   16.00
 -12   4  -3   19.10   11.40
  12   4   3   15.30    7.90
  12  -4  -3    8.70    6.30
 -12  -4  -4   -3.60    8.90
 -12   4   4    4.60    9.80
 -12  -4  -4    6.90    7.90
 -12  -4   4    0.90   11.20
 -12   4  -4   -4.00   11.90
 -12  -4   4   -3.20    5.50
 -12   4  -4   -4.60    9.30
 -12  -4  -5   25.20   11.30
 -12   4   5   25.90    9.50
 -12  -4   5    7.70    8.20
 -12  -4   5   20.40    8.20
 -12   4  -5   15.90    6.50
 -12   4  -5   10.10   10.80
 -13   4   0  102.19   24.60
  13  -4   0  103.29   18.50
 -13  -4   0   83.79   23.50
  13  -4   1   20.80    8.50
 -13  -4  -1   24.40   15.60
  13  -4  -1   24.20    7.40
 -13  -4   1   40.20   16.20
  13   4   1   26.60    8.20
 -13  -4   1   34.90   14.80
 -13   4  -1   18.00   17.00
 -13  -4  -2   55.49   21.20
  13  -4   2  100.29   18.00
  13   4   2  126.39   18.00
  13  -4  -2   87.59   16.40
 -13  -4   2   74.59   21.30
 -13   4  -2   46.70   22.50
 -13  -4  -3   19.80    9.60
 -13   4   3   10.20   12.60
 -13   4  -3    5.50   15.40
 -13  -4   3    1.50    4.80
 -13  -4   3    2.00    8.60
 -13  -4  -4    7.00    8.90
 -13   4   4    4.30    8.40
 -13  -4   4    7.30    5.60
 -13  -4   4   -3.70    7.00
 -13   4  -4   -6.90   11.00
 -13   4   5   27.30    9.10
  13  -4   5   33.10    7.90
 -13  -4   5   20.80    8.20
 -14   4   0    0.80   13.30
 -14  -4   0   -1.40   12.70
 -14  -4  -1  -10.30   12.70
 -14   4  -1    6.70   10.50
 -14  -4   1   19.10   12.00
 -14  -4  -2   -4.70    8.40
 -14   4  -2   10.20   14.90
 -14  -4   2   -0.50   13.00
 -14  -4  -3    9.70   11.00
 -14  -4   3   -0.90    8.40
 -14   4  -3   -8.40   12.70
 -14  -4   3    5.80    8.50
 -14   4   4   -4.00   10.40
 -14  -4  -4    6.30    5.60
 -14   4  -4    4.80    9.90
 -14  -4   4   -4.60    8.00
 -14  -4   4    4.10    6.90
 -15  -4   0   38.60   11.20
 -15   4   0   24.00   13.20
 -15  -4  -1    9.50   11.70
 -15   4  -1   -9.20   12.10
 -15  -4  -2   33.50   10.80
 -15   4  -2   28.60   11.10
 -15  -4   2   28.10   11.30
 -15  -4  -3    7.90    9.70
 -15  -4   3  -12.80    7.90
 -15   4  -3   11.00    7.80
 -16  -4   0   -3.80    8.90
 -16  -4  -1   -4.60    9.00
   0  -5   0    2.10    6.60
   0   5   0    2.10    6.50
   0   5  -1   47.80   14.90
   0   5   1   63.59   14.30
   0  -5  -1   84.89   16.30
   0  -5   1   81.69   14.10
   0   5   2  238.18   43.60
   0  -5   2  245.88   41.80
   0  -5  -2  235.48   44.30
   0  -5  -3  191.18   36.50
   0  -5  -3  183.18   32.60
   0   5   3  178.08   35.50
   0   5  -3  187.18   32.80
   0   5   4  142.99   32.20
   0   5   5    4.90    8.40
   0  -5  -5    8.80    9.60
   0   5  -5   15.60    9.60
   0  -5  -5    6.30   12.30
   0  -5  -5   -3.10    9.10
   0   5  -5   13.60    9.80
   0   5  -5   14.70    9.20
   0  -5   5    3.10    8.70
   0   5   5    5.40    9.60
   0   5   6  -11.60    9.20
   0  -5  -6    1.50   11.20
   0  -5  -6   -2.90    9.70
   0   5   6   -8.80    9.70
   0   5  -6   16.30   10.90
   0   5  -6  -24.30   14.50
   0  -5  -6   -9.20   10.50
   0   5  -6   -6.40   12.60
   0   5  -7  106.29   22.20
   0  -5  -7  121.39   22.80
   0   5   7  101.29   21.50
   0   5  -7   78.49   21.90
   0  -5  -7  115.39   23.00
   0  -5  -8    6.30    8.50
   0   5  -8    8.70    6.80
   0  -5  -8  -14.70    9.40
   0  -5  -8   13.80    9.10
   0   5  -8   -8.90    5.40
   0   5   8    6.80    9.30
  -1  -5   0  546.95   86.19
   1   5   0  489.15   86.09
  -1   5   0  461.15   86.49
   1  -5   0  523.15   86.69
   1  -5   1  207.48   36.40
   1   5  -1  197.58   35.10
  -1   5   1  195.58   35.40
  -1  -5  -1  210.88   37.40
  -1  -5   1  209.08   35.30
   1  -5  -1  220.58   37.80
   1   5   1  208.08   37.00
  -1   5  -1  205.08   37.10
  -1   5   2  498.95   77.79
   1  -5   2  467.45   77.19
   1   5  -2  453.15   76.29
  -1  -5  -2  453.85   78.79
   1   5   2  444.56   78.29
   1  -5  -2  433.76   76.19
   1  -5  -2  427.56   77.19
   1  -5  -2  454.75   78.69
   1  -5   3  145.69   25.20
  -1   5   3  139.89   27.60
   1   5  -3  117.59   23.50
   1  -5  -3  141.19   23.70
   1  -5  -3  106.59   26.60
   1   5   3  126.19   27.10
   1   5  -4  395.26   65.69
  -1   5   4  436.86   71.09
   1  -5  -4  355.36   65.49
  -1   5   5  114.79   19.00
  -1  -5  -5   82.39   18.60
   1  -5   5   91.09   19.10
  -1  -5  -5   87.39   19.20
  -1   5   5   87.69   20.80
   1   5  -5   77.59   18.80
   1   5  -5   76.49   18.80
  -1  -5  -5   95.59   19.30
   1  -5  -5   81.69   19.80
   1  -5  -5   86.49   19.10
  -1   5  -5   76.29   18.50
  -1  -5   5   77.09   18.50
  -1  -5   5   92.29   18.50
  -1   5  -5   60.49   18.60
   1  -5  -5   92.49   19.20
  -1   5  -5   93.09   19.50
   1   5   5   97.59   20.40
   1   5   5   98.59   18.90
  -1  -5  -6   13.30   11.10
  -1   5   6   15.20   10.70
  -1   5   6   -4.70   10.90
   1   5  -6   -5.40    9.80
  -1  -5  -6   15.10   11.20
  -1   5   6   27.70   10.60
  -1  -5  -6    4.70   10.70
  -1  -5  -6    7.70   10.80
   1   5  -6   24.70   13.90
  -1   5  -6    6.60   11.50
   1  -5  -6   10.40   10.30
  -1   5  -6   -6.60   10.40
   1  -5  -6   -0.10   11.00
   1   5   6    9.30   10.60
   1  -5  -6   30.40   12.60
   1   5   6   -2.50    9.60
  -1   5  -6   -0.30   10.50
   1   5  -7   27.20   12.00
   1   5  -7   19.50   11.00
  -1   5   7   11.60   11.80
  -1  -5  -7   10.30   10.90
  -1  -5  -7    3.10    7.10
  -1   5  -7   18.60   10.90
  -1   5  -7   -8.20   11.60
   1  -5  -7   18.30   11.70
  -1   5  -7   10.00    8.40
   1   5   7   -7.80   10.70
   1  -5  -7    7.40   10.60
   1   5   7   17.50   11.20
  -1  -5  -8   28.70   10.60
  -1   5   8   11.60   10.80
  -1  -5  -8   40.50   10.80
   1   5  -8   37.70    9.40
  -1  -5  -8   23.50    9.60
   1   5  -8   32.00   10.10
   1  -5  -8   32.20    9.10
  -1   5  -8   22.00   10.30
  -1   5  -8   29.70   10.30
   1   5   8   24.60   10.50
   1  -5  -8   26.00   11.40
   1  -5  -8   16.00    9.50
  -1   5  -8   27.70   11.10
  -2   5   0  104.79   19.00
   2   5   0  116.59   21.10
   2  -5   0  123.09   22.30
   2  -5   1 1070.19  179.38
   2   5  -1 1026.80  177.78
   2   5  -1 1078.19  177.88
  -2   5  -1 1057.49  178.98
   2   5   1 1072.39  179.48
   2  -5  -1 1025.80  177.88
   2  -5  -1 1156.78  179.88
   2  -5   2  407.56   60.59
   2  -5   2  364.06   59.59
   2   5  -2  337.67   57.39
   2  -5   2  322.97   57.49
   2  -5  -2  350.56   57.49
   2  -5  -2  312.67   58.09
   2  -5  -2  326.87   60.29
   2   5   2  341.17   57.59
   2   5   2  313.37   59.79
   2  -5   3    5.70    6.50
   2  -5   3   -5.20   10.00
   2   5  -3    1.80    5.90
   2  -5  -3    5.00   10.30
   2   5   3    5.70    6.20
   2  -5  -3    6.40    6.20
   2   5   3   -0.60   10.60
   2   5  -4   21.60    7.60
   2   5   4    0.00   12.60
   2  -5  -4    5.40    6.10
   2  -5  -4  -11.00   10.80
   2   5  -5   66.69   14.60
  -2   5   5   55.19   13.10
  -2  -5  -5   33.70   13.00
  -2  -5  -5   54.19   14.10
  -2  -5  -5   46.50   14.40
  -2   5   5   59.19   14.90
   2  -5   5   66.79   14.30
   2   5  -5   52.19   14.30
   2   5  -5   55.99   13.60
   2   5   5   49.50   13.70
  -2  -5   5   48.20   14.10
  -2   5  -5   42.30   13.40
   2   5   5   36.10   13.30
  -2   5  -5   48.00   14.20
   2  -5  -5   46.40   13.70
  -2  -5   5   52.79   15.60
   2  -5  -5   53.49   14.20
  -2   5  -5   43.40   14.40
   2   5  -6   54.59   13.60
  -2  -5  -6   29.60   13.00
  -2  -5  -6   36.60   13.00
   2   5  -6   23.80   11.80
  -2  -5  -6   32.20   12.00
  -2   5   6   16.90   11.10
  -2   5   6    1.10   11.90
   2  -5  -6   37.50   13.30
  -2   5  -6   15.20   12.70
  -2   5  -6   12.20   12.40
   2  -5  -6   18.40   11.30
  -2   5  -6   25.90   13.30
   2   5   6   38.90   12.70
   2  -5  -6   56.99   14.20
   2   5   6   34.90   12.30
  -2  -5   6   71.49   22.50
  -2  -5  -7   31.80   12.10
   2   5  -7   40.10   14.20
  -2   5   7   28.30   12.10
  -2   5   7   44.80   14.50
  -2  -5  -7   32.30   11.20
   2   5  -7   42.50   12.40
   2  -5  -7   21.60   12.10
  -2   5  -7   53.79   14.80
  -2   5  -7   32.70   13.20
  -2   5  -7   54.39   13.70
   2   5   7   47.50   13.30
   2  -5  -7   15.20   12.80
   2   5  -8    5.50    9.50
  -2  -5  -8   -6.90   12.10
  -2  -5  -8    9.10    7.00
  -2  -5  -8   11.80    9.20
   2   5  -8    6.60    7.90
  -2   5   8   14.20    7.90
  -2   5  -8   10.30    8.90
   2  -5  -8   19.00    9.30
   2  -5  -8   11.60   10.40
  -2   5  -8   24.70   10.30
  -2   5  -8   11.30    6.10
   3   5   0  180.08   32.80
   3  -5   0  209.28   34.60
   3  -5   0  175.98   31.00
   3  -5   1  247.18   39.80
   3  -5   1  202.68   37.80
   3  -5   1  212.98   36.80
   3   5  -1  212.38   36.90
   3   5   1  203.58   36.70
   3   5   1  245.08   40.40
  -3   5  -1  223.18   38.50
   3  -5  -1  223.88   40.10
   3  -5  -1  214.08   36.70
   3  -5   2  444.26   82.19
   3  -5   2  489.95   82.49
   3  -5   2  483.15   80.29
   3   5  -2  487.85   80.09
   3  -5  -2  501.15   80.29
   3   5   2  462.45   83.49
   3  -5  -2  473.65   83.19
   3   5   2  439.86   80.29
   3  -5   3   24.50   15.00
   3  -5   3   46.90    9.80
   3  -5  -3   14.80   12.70
   3   5   3   35.30    9.30
   3   5   3   35.80   13.90
   3  -5  -3   37.20    9.10
   3   5  -4  183.78   32.30
  -3  -5  -4  180.08   33.30
  -3   5   4  186.48   32.30
  -3   5   4  211.08   33.90
   3  -5  -4  200.48   38.10
  -3  -5   4  144.39   33.00
   3  -5  -4  181.08   32.10
  -3   5  -4  217.18   34.00
  -3   5  -4  133.39   33.40
   3   5   4  141.79   38.00
  -3   5   5   18.60   12.30
  -3  -5  -5   28.80   11.70
   3  -5   5   20.80   11.40
   3   5  -5   12.40   10.70
   3  -5   5   23.20   11.00
  -3   5   5   36.30   10.10
  -3  -5  -5   15.20   10.70
  -3  -5  -5   19.70   12.20
   3   5  -5   25.80   12.30
   3   5  -5   44.00   11.20
  -3   5   5    7.50   10.50
   3  -5  -5   21.40   12.40
  -3   5  -5   35.90   12.60
  -3   5  -5   37.00   12.20
   3  -5  -5   22.70   11.30
  -3   5  -5   63.19   12.90
  -3  -5   5   11.10   10.90
   3   5   5   55.59   13.50
   3  -5  -5   22.60   13.00
   3   5   5   22.90   10.40
  -3   5   6  183.98   33.40
   3   5  -6  162.68   32.40
  -3  -5  -6  148.79   32.00
  -3  -5  -6  202.58   33.40
  -3   5   6  182.98   33.50
  -3   5   6  127.19   31.10
  -3  -5  -6  201.28   32.40
   3   5  -6  179.98   32.40
  -3  -5  -6  168.28   32.60
  -3   5  -6  189.58   33.30
  -3  -5   6  159.18   32.60
  -3   5  -6  160.88   32.50
   3   5   6  176.18   32.40
  -3   5  -6  203.98   33.60
   3  -5  -6  132.89   31.70
   3  -5  -6  164.68   33.50
   3   5  -7   55.79   14.40
  -3  -5  -7   31.00   12.90
  -3  -5  -7   24.80   13.40
  -3  -5  -7   34.70   10.20
  -3   5   7   44.90   12.30
   3   5  -7   35.60   12.10
   3  -5  -7   25.30   12.10
  -3   5  -7   41.90   13.70
  -3   5  -7   45.90   13.30
   3  -5  -7   34.10   13.90
  -3   5  -7   52.69   12.40
   3   5   7   24.40   11.80
  -3   5   8   21.70    8.00
  -3  -5  -8   11.00    5.40
   3   5  -8    7.90    5.70
  -3  -5  -8   11.10    6.80
   3   5  -8   26.80   10.00
  -3   5  -8   11.00    9.70
   3  -5  -8   16.80   10.30
   3  -5  -8   16.90    7.60
  -3   5  -8   11.00    6.40
   4  -5   0 1011.30  161.68
   4  -5   0  933.71  159.08
   4   5   0  907.91  158.88
   4   5   0 1044.70  161.78
   4  -5   0  946.61  158.98
   4   5  -1  186.48   31.50
   4  -5   1  168.28   33.50
   4   5  -1  176.58   32.50
   4  -5   1  204.38   32.00
   4  -5   1  212.38   36.10
   4   5   1  173.68   31.80
   4  -5  -1  225.48   36.70
  -4   5  -1  185.78   35.20
   4  -5  -1  177.58   31.80
   4   5   1  230.18   37.60
   4   5  -2  117.29   21.20
   4  -5   2  147.19   25.80
   4  -5   2  136.99   26.30
   4  -5   2  115.29   21.50
   4  -5  -2  109.09   25.70
   4   5   2  118.29   21.50
   4   5   2  115.39   26.40
   4  -5  -2  121.69   21.50
   4   5  -3  429.26   69.69
   4  -5   3  395.86   69.89
   4  -5   3  403.86   73.49
   4   5   3  421.56   70.19
   4   5   3  426.26   74.09
   4  -5  -3  379.36   73.39
   4  -5  -3  404.96   70.09
   4   5  -4   57.99   11.20
  -4  -5  -4   56.29   13.10
  -4   5   4   52.99   15.80
  -4   5   4   36.90   10.80
   4   5  -4   52.79   13.90
   4   5   4   31.80   11.30
  -4  -5   4   67.79   14.40
  -4   5  -4   45.90   13.60
  -4  -5   4   58.09   13.80
  -4   5  -4   31.10   13.10
   4   5   4   31.60   11.50
   4  -5  -4   32.10   11.20
  -4   5  -4   47.80   12.50
   4  -5  -4   52.49   14.20
  -4  -5  -5   63.59   17.10
  -4  -5  -5   98.79   18.30
  -4   5   5   83.39   19.00
   4   5  -5  100.19   17.50
  -4   5   5   82.09   17.10
  -4   5   5   58.19   17.80
   4   5  -5   93.09   17.00
   4   5  -5   80.49   16.90
   4  -5  -5   48.30   18.10
   4  -5  -5   60.39   15.80
   4  -5  -5   83.59   18.60
  -4   5  -5   74.19   18.00
  -4   5  -5   56.59   15.90
  -4  -5   5   79.19   18.40
  -4   5  -5   75.69   18.20
   4   5   5   51.19   16.00
  -4   5  -5   83.89   17.90
  -4   5   6  171.08   32.30
  -4   5   6  141.39   31.00
  -4  -5  -6  142.09   30.90
  -4   5   6  184.78   30.50
  -4  -5  -6  172.38   30.80
   4   5  -6  201.88   32.10
  -4  -5  -6  140.69   31.00
   4   5  -6  162.58   30.60
   4   5   6  210.58   32.50
  -4   5  -6  203.28   32.50
   4  -5  -6  134.39   31.60
  -4   5  -6  110.19   30.30
  -4  -5   6  171.28   32.10
   4   5   6  133.69   30.30
   4  -5  -6  147.49   30.70
   4  -5  -6  187.48   31.70
  -4  -5  -7   19.80    9.10
   4   5  -7   19.40    9.10
   4   5  -7   10.30    8.80
  -4   5   7  -10.20   12.60
  -4  -5  -7   16.20   11.60
  -4   5   7   17.50   12.40
  -4   5  -7   18.60   10.50
   4  -5  -7   28.60   10.00
  -4   5  -7   20.90    9.80
   4  -5  -7   13.80    9.50
   4  -5  -7   22.90   11.80
  -4  -5  -8   14.80    9.00
  -4   5   8    2.70    9.40
   4   5  -8   15.00    9.20
  -4   5  -8    3.20    9.00
  -4   5  -8   11.30    6.10
   4  -5  -8   11.00    9.70
   4  -5  -8   14.10    7.00
   5  -5   0 1667.23  266.67
   5  -5   0 1595.84  263.57
   5   5   0 1460.95  263.47
   5   5   0 1725.63  267.07
   5  -5   0 1566.64  264.07
   5  -5   1   33.20   11.60
   5  -5   1   39.10    8.80
   5  -5   1   60.49   15.80
   5   5  -1   43.80    7.80
   5  -5  -1   47.40   15.00
   5   5   1   67.59   18.30
   5  -5  -1   45.70    8.40
   5   5   1   44.80    8.80
   5  -5   2  646.74  109.89
   5  -5   2  606.04  108.89
   5  -5   2  615.54  106.39
   5   5  -2  618.64  105.99
   5   5   2  606.34  106.39
   5   5   2  695.33  110.59
   5  -5  -2  610.84  109.69
   5  -5  -2  676.53  106.19
   5  -5   3  134.39   36.20
   5   5  -3  185.88   32.60
   5  -5   3  197.98   38.10
   5  -5   3  209.68   33.50
   5   5   3  183.88   39.00
   5  -5  -3  208.88   33.30
   5   5   3  190.58   33.50
   5  -5  -3  122.49   36.40
  -5  -5  -4   24.70    9.70
   5   5  -4   47.40   12.90
  -5   5   4   34.90    9.10
  -5  -5  -4   50.49   11.20
  -5   5   4   38.20   12.10
  -5   5   4   28.20   12.90
   5  -5   4   23.10   10.40
  -5   5  -4   25.90   11.50
  -5  -5   4   31.50   15.00
  -5   5  -4   44.60   14.40
   5  -5  -4   42.50   11.50
  -5  -5   4   17.10   11.00
   5   5   4   23.30    9.40
   5   5   4   29.30   10.40
  -5   5  -4   17.70   10.50
  -5   5  -4   29.40   12.40
   5  -5  -4   40.40   10.10
  -5  -5  -5  156.68   31.60
   5   5  -5  178.88   30.10
  -5  -5  -5  153.48   30.40
   5   5  -5  167.48   30.40
  -5   5   5  180.78   30.40
  -5   5   5  155.18   31.50
  -5   5   5  148.19   26.90
  -5  -5  -5  197.68   31.00
  -5   5   5  129.89   31.20
   5   5   5  200.18   31.20
  -5   5  -5  174.08   30.80
  -5  -5   5  133.79   27.20
   5  -5  -5  183.08   31.20
   5  -5  -5  153.48   30.30
  -5  -5   5  214.78   32.30
  -5  -5   5  204.88   32.30
   5  -5  -5  199.58   30.50
  -5   5  -5  262.67   33.40
  -5   5  -5  241.48   33.00
   5   5  -6   22.30   12.80
  -5  -5  -6   39.50   10.90
   5   5  -6   30.60   10.80
  -5   5   6   31.90   14.20
  -5  -5  -6   34.00   12.90
  -5   5   6   18.00   14.30
  -5  -5  -6   44.30   11.20
   5  -5   6   24.20   13.60
  -5   5   6   13.60    9.80
   5   5  -6   15.60   11.60
  -5   5  -6   25.10   11.60
  -5  -5   6   49.30   15.00
   5  -5  -6   48.50   12.10
  -5   5  -6   13.40   13.30
   5  -5  -6   35.00   11.40
   5  -5  -6   10.60   11.60
  -5   5  -6   25.00   12.10
  -5   5   7    3.70   12.50
  -5  -5  -7    5.70    7.50
  -5  -5  -7   14.60   11.60
   5   5  -7   -7.10    9.50
  -5   5   7   23.00    9.90
  -5   5  -7   -2.80   11.00
   5  -5  -7   13.00    7.80
  -5   5  -7   16.40    7.90
   5  -5  -7   -7.70   11.00
  -5  -5  -8   47.00   10.90
  -5   5   8   24.00   10.30
   5   5  -8   31.70    8.40
  -5   5  -8   30.20   10.40
   5  -5  -8   27.60    8.40
  -5   5  -8   23.30    7.90
   5  -5  -8   39.90   10.50
   6   5   0  938.61  162.28
   6  -5   0  913.81  158.18
   6  -5   0 1051.69  162.28
   6  -5   1  874.41  144.49
   6  -5   1  810.22  142.09
   6  -5   1  858.61  140.49
   6   5   1  824.42  144.29
   6  -5  -1  830.02  143.99
   6  -5  -1  806.02  140.19
   6   5   1  860.21  140.39
   6   5  -2  185.88   30.20
   6  -5   2  212.18   37.80
   6  -5   2  182.68   31.10
   6  -5   2  156.78   34.60
   6   5   2  150.68   36.50
   6  -5  -2  125.29   35.00
   6  -5  -2  167.28   30.60
   6   5   2  185.58   31.00
  -6   5   3  100.69   24.30
  -6  -5  -3  124.79   24.80
   6  -5   3   51.99   26.30
  -6   5   3  135.89   21.90
   6   5  -3  101.39   22.80
   6  -5   3  105.09   23.40
   6  -5   3  130.39   32.60
  -6  -5  -3  113.29   24.60
  -6   5  -3  115.49   25.20
  -6   5  -3  121.09   26.40
  -6  -5   3  148.39   22.00
   6  -5  -3   69.69   28.00
  -6  -5   3  118.59   25.40
  -6  -5   3  128.89   27.20
  -6   5  -3  103.09   24.20
   6   5   3  122.49   23.80
  -6   5  -3  148.69   26.20
   6  -5  -3  127.19   23.50
  -6   5   4    7.50   10.50
  -6   5   4   14.90    7.70
  -6  -5  -4    6.70    9.20
   6  -5   4   31.20    8.10
  -6   5   4    4.70   11.90
  -6  -5   4    7.20   12.10
   6   5   4    7.00    8.80
  -6   5  -4   30.70   14.60
  -6  -5   4   14.80   10.20
  -6   5  -4   -2.80   10.90
  -6   5  -4   23.50   11.10
   6   5   4    7.20    9.20
   6  -5  -4    7.30    8.10
  -6   5  -4    8.30   11.00
   6   5  -5    5.50   10.20
  -6  -5  -5    9.60   10.40
  -6   5   5   24.40    9.40
   6   5  -5   11.70    7.90
  -6   5   5   11.70    9.80
  -6   5   5   23.80   14.60
  -6  -5  -5    8.80   11.30
  -6   5  -5   18.50   11.70
  -6   5  -5   34.50   12.30
   6  -5  -5   33.60   10.50
  -6  -5   5   15.80   13.70
  -6   5  -5    9.00   11.40
   6  -5  -5   21.30   10.90
  -6  -5   5   17.90   11.90
   6  -5  -5   22.60   11.00
  -6   5   6   88.69   18.20
  -6  -5  -6   53.59   19.40
  -6   5   6   88.19   21.20
   6   5  -6   79.69   19.00
   6   5  -6  102.39   18.50
   6  -5   6   69.49   18.50
  -6   5   6   82.89   21.10
  -6   5  -6   66.09   19.60
  -6   5  -6  101.79   20.30
  -6   5  -6   97.49   20.70
   6  -5  -6   94.69   19.50
  -6  -5   6  113.49   24.80
   6  -5  -6   67.79   18.30
   6  -5  -6  102.19   18.90
  -6  -5  -7   41.60   10.70
  -6   5   7   23.00   12.90
  -6   5   7   18.80   13.20
   6   5  -7   25.30   10.90
   6  -5  -7   24.20   12.50
   6  -5  -7   23.00   10.80
  -6   5  -7   33.90    9.50
  -6   5  -7   13.60   11.80
   7   5   0  706.93  108.39
   7  -5   0  597.74  103.09
   7  -5   0  605.34  107.69
   7   5  -1   98.69   27.60
   7  -5   1  184.88   31.00
   7  -5   1  124.39   22.40
   7  -5  -1  124.69   28.50
   7   5   1  167.18   31.80
   7  -5  -1  124.09   21.80
   7   5   1  127.29   22.30
  -7   5   2   78.79   13.50
  -7  -5  -2   61.49   16.70
   7   5  -2   66.39   13.90
   7  -5   2   77.99   24.60
   7  -5   2   62.19   15.30
  -7   5  -2   57.09   18.00
   7   5   2   70.39   15.00
  -7   5  -2   71.79   18.60
   7  -5  -2   71.29   14.50
   7  -5  -2   62.79   20.90
  -7  -5   2   88.59   13.70
  -7  -5   2   81.59   18.00
  -7   5  -2   79.39   17.70
   7  -5   3  357.76   60.79
  -7  -5  -3  350.36   61.69
  -7  -5  -3  336.37   61.59
  -7  -5  -3  347.77   61.49
   7   5  -3  361.16   60.09
  -7   5   3  355.76   62.29
  -7   5   3  322.57   61.69
  -7   5  -3  321.07   64.69
  -7   5  -3  328.27   62.49
   7   5   3  376.36   60.89
  -7   5  -3  324.07   61.49
  -7   5  -3  353.36   62.29
   7  -5  -3  418.76   60.89
  -7  -5   3  357.56   62.09
  -7   5   4  136.19   22.30
  -7   5   4  125.99   26.30
  -7  -5  -4  117.09   25.50
   7  -5   4  102.99   25.00
  -7   5   4   69.89   26.10
  -7  -5  -4  100.49   25.50
  -7  -5   4  153.78   22.50
  -7   5  -4  100.99   26.30
   7  -5  -4  105.89   24.40
  -7   5  -4  106.99   27.10
  -7   5  -4  115.29   26.60
  -7  -5   4   87.39   25.80
  -7   5  -4  150.78   27.80
   7   5   4  114.49   25.20
  -7   5   5   47.50   22.50
  -7   5   5   56.19   22.30
   7   5  -5   74.59   19.70
  -7   5   5  120.99   17.20
  -7  -5  -5   98.09   22.00
  -7  -5  -5  103.39   22.00
  -7   5  -5   75.99   21.10
   7  -5  -5   97.09   22.20
  -7   5  -5   69.09   21.40
  -7   5  -5   94.59   24.40
   7  -5  -5   60.79   20.20
  -7  -5   5   99.69   17.70
  -7  -5   5   78.39   22.20
  -7   5  -5   55.59   21.00
   7  -5  -5   92.79   20.50
   7   5  -6   89.29   19.40
   7  -5   6   83.69   18.80
  -7   5   6   54.99   20.20
   7   5  -6   86.89   19.60
  -7   5   6   52.39   20.60
  -7  -5  -6   87.29   20.80
  -7   5  -6   79.69   18.10
  -7   5  -6  127.19   21.70
  -7   5  -6  105.99   20.20
   7  -5  -6  117.39   20.00
   7  -5  -6   67.59   18.10
  -7  -5   6   93.69   20.80
   7   5  -7   22.60    9.40
  -7   5   7   26.80   10.00
  -7  -5  -7   14.90    8.90
  -7   5   7   18.60    9.10
  -7   5  -7   25.10   10.40
  -7   5  -7   15.60   10.50
  -7   5  -7   37.70    8.90
   7  -5  -7   17.10   11.60
   7  -5  -7   23.50    9.90
  -8   5   0  323.57   60.99
   8  -5   0  357.76   58.49
   8   5   0  344.67   66.79
  -8  -5   0  342.97   60.29
  -8  -5  -1  359.26   63.99
   8  -5   1  379.06   62.39
  -8  -5  -1  356.36   63.89
  -8   5  -1  369.06   64.39
   8   5   1  373.96   62.19
  -8  -5   1  326.77   63.89
  -8   5  -1  401.36   64.39
   8  -5  -1  364.46   61.89
  -8  -5   1  373.96   63.99
   8   5  -2  418.96   72.19
  -8  -5  -2  357.46   74.29
  -8  -5  -2  427.16   74.39
  -8  -5  -2  408.76   74.29
   8  -5   2  472.75   73.09
  -8   5   2  422.86   74.59
  -8   5  -2  432.16   74.79
   8  -5  -2  452.05   72.59
  -8  -5   2  390.56   74.39
   8   5   2  456.85   72.99
  -8  -5   2  395.86   73.89
  -8   5  -2  475.75   75.19
  -8   5  -2  476.05   74.89
  -8   5  -2  417.26   73.69
   8   5  -3   91.49   19.20
  -8  -5  -3  108.09   20.60
   8  -5   3   95.49   20.40
  -8  -5  -3  120.29   23.20
  -8  -5  -3  136.09   22.70
  -8   5   3   89.39   23.20
  -8   5  -3  114.29   23.90
  -8  -5   3  104.39   18.40
  -8   5  -3  135.29   24.90
  -8   5  -3  112.09   23.60
  -8   5  -3   98.59   21.20
  -8  -5   3  109.69   23.10
   8   5   3  103.89   20.40
   8  -5  -3  107.99   20.20
  -8  -5  -4    3.60   10.20
  -8  -5  -4   -0.60    7.70
  -8   5   4   25.80   14.10
   8  -5   4    3.10    7.40
  -8   5   4   -9.10   12.20
   8  -5  -4   -3.80    7.70
  -8   5  -4    3.40   11.10
  -8  -5   4    5.70   12.10
  -8   5  -4   -0.50   10.90
   8   5   4    0.40    9.40
  -8   5  -4   29.20   13.30
  -8   5  -4   26.90   13.30
  -8  -5  -5  245.68   42.80
  -8   5   5  153.48   42.80
  -8  -5  -5  245.18   43.80
   8   5  -5  243.08   41.90
  -8   5   5  278.57   44.50
  -8  -5   5  255.57   43.80
   8  -5  -5  241.78   41.80
  -8   5  -5  224.48   43.80
   8  -5  -5  229.48   43.00
  -8   5  -5  168.38   42.20
  -8   5  -5  283.77   43.20
  -8   5  -5  243.78   42.80
   8  -5   6   43.30   14.80
  -8   5   6   49.50   17.30
  -8  -5  -6  114.99   19.10
  -8   5   6   19.80   16.70
  -8   5  -6   47.70   15.60
  -8   5  -6   74.19   17.60
  -8   5  -6   92.79   16.10
  -8  -5   6   82.49   17.90
  -8   5   7   39.30   10.50
  -8  -5  -7   38.20   12.40
  -8   5   7   40.00   10.30
  -8   5  -7   41.10   10.30
  -8   5  -7   33.40    9.10
  -8   5  -7   20.30   10.80
   8  -5  -7   32.70    9.80
  -9   5   0   46.40   14.00
   9   5   0   34.60    7.20
  -9  -5   0   41.20   13.60
  -9  -5   0   40.30   13.50
  -9  -5   0   17.50   12.70
   9  -5   0   48.70    8.40
  -9   5   1  122.29   19.30
  -9  -5  -1  126.49   29.60
  -9  -5  -1   69.99   22.30
   9  -5   1  108.19   20.60
  -9  -5  -1   75.29   23.10
   9   5   1   78.69   19.90
   9  -5  -1   91.19   19.90
  -9  -5   1  136.99   19.50
  -9   5  -1   78.19   23.80
  -9  -5   1   88.39   23.40
  -9  -5   1   99.79   23.30
  -9   5  -1   87.09   22.80
  -9  -5  -2    8.00   10.40
   9   5  -2   16.60    5.10
  -9   5   2   24.70    4.60
   9  -5   2   19.10    7.60
  -9   5   2    5.20   12.20
  -9  -5  -2   -5.50   12.90
  -9   5  -2   13.50   12.40
  -9  -5   2    1.30   11.50
  -9  -5   2   18.80    5.00
  -9   5  -2   14.30   11.40
  -9   5  -2    7.00   12.90
   9  -5  -2   18.90    6.30
   9   5   2   17.50    7.20
  -9  -5   2   20.40   11.20
  -9  -5  -3  108.69   21.70
  -9   5   3  102.89   22.40
   9  -5   3   83.49   18.50
  -9  -5  -3   65.19   19.10
   9   5  -3   90.39   17.00
   9   5   3   78.89   18.10
  -9   5  -3   86.49   22.70
   9  -5  -3  102.59   18.20
  -9   5  -3  104.69   18.70
  -9   5  -3   85.79   22.30
  -9  -5   3   88.19   20.00
  -9   5  -3  101.79   21.70
  -9  -5  -4   21.70   11.70
  -9  -5  -4   23.90    8.50
  -9  -5  -4   30.10   12.20
   9   5  -4   20.70    8.00
  -9   5   4    9.40   14.30
  -9   5   4    6.70   13.20
   9  -5   4   22.60    8.90
  -9   5  -4   -4.60   11.70
  -9   5  -4    7.90   10.70
  -9   5  -4   32.90   14.60
  -9   5  -4   47.20   12.30
  -9  -5   4   12.70   10.20
   9   5   4   16.30    8.90
   9  -5  -4   23.10    8.80
  -9   5   5   87.89   23.50
  -9  -5  -5  162.48   24.40
   9   5  -5  105.49   21.40
  -9   5   5  100.89   22.90
  -9   5  -5   66.39   22.20
  -9  -5   5  110.39   24.10
  -9   5  -5  129.39   25.40
  -9   5  -5  121.79   22.00
   9  -5  -5  130.99   21.80
  -9   5  -5   91.89   23.10
   9  -5   6   52.59   13.70
  -9   5   6   66.49   16.00
  -9   5   6   68.99   15.80
  -9  -5  -6   61.29   17.10
  -9   5  -6   60.19   15.60
  -9   5  -6   91.69   16.70
  -9  -5   6   61.79   17.20
  -9   5  -6   77.89   16.50
  -9  -5  -7   22.40    7.70
  -9   5   7   15.40    9.10
  -9   5  -7    7.50    7.40
   9  -5  -7   14.70    8.50
  10  -5   0   11.70    5.30
 -10  -5   0    9.40   12.00
 -10  -5   0   -0.10   11.30
  10   5   0   14.40    4.50
 -10   5   0   16.10   14.10
 -10   5   1   46.30    8.40
  10  -5   1   49.80    9.80
 -10  -5  -1   45.90   15.70
  10   5   1   39.00    9.30
 -10  -5   1   51.99   15.40
 -10   5  -1   42.80   14.70
 -10  -5   1   36.00    9.00
 -10  -5   1   55.89   15.40
  10  -5  -1   42.80    9.10
 -10   5  -1   38.20   15.70
  10  -5   2  357.66   58.69
 -10  -5  -2  346.17   60.69
 -10   5   2  332.67   60.89
  10  -5  -2  329.17   57.99
 -10   5  -2  374.96   61.59
 -10   5  -2  354.66   61.19
 -10  -5   2  319.77   60.69
 -10  -5   2  293.47   60.39
  10   5   2  359.86   58.69
  10  -5   3   21.40    9.80
 -10   5   3   39.50   15.60
 -10  -5  -3   13.10   10.00
 -10  -5  -3   23.70   13.30
  10   5   3   14.50    7.70
 -10  -5   3   27.40   13.60
  10  -5  -3   19.50    7.90
 -10   5  -3   22.90   12.90
 -10   5  -3   14.20   14.70
 -10   5  -3   23.60   15.60
  10  -5   4   27.10   10.60
 -10   5   4    7.90   14.60
  10   5  -4   35.40    8.20
 -10  -5  -4    0.60   10.50
 -10  -5  -4   25.60    9.60
 -10   5  -4   13.10   12.50
 -10   5  -4   17.80   15.30
  10  -5  -4   21.40    8.40
 -10  -5   4   17.50   12.90
  10   5   4   30.20   10.90
 -10   5  -4   -5.40   13.50
 -10   5   5    8.60   13.90
  10   5  -5   25.20    9.00
 -10  -5  -5   15.90   12.20
 -10  -5   5   21.80    9.60
 -10   5  -5    7.90   10.30
 -10  -5   5    0.00    4.90
  10  -5  -5    8.50    8.70
 -10   5  -5   -4.40   13.60
 -10   5  -5   10.40   10.90
 -10   5  -5   23.70   10.30
 -10  -5  -6   42.50    9.90
 -10   5   6   11.90    8.20
  10  -5   6    9.30    5.90
 -10  -5   6    1.20    5.70
  10  -5  -6   36.30   10.40
 -10  -5   6   15.20    8.20
 -10   5  -6   13.90    7.00
 -11  -5   0    6.60   13.90
  11  -5   0    7.50    5.00
 -11   5   0    1.30   12.90
 -11  -5   0   -7.20   12.40
  11   5   0   -1.00    4.50
  11  -5   1  200.28   34.20
 -11  -5  -1  188.18   38.10
 -11  -5   1  171.38   37.50
 -11   5  -1  243.88   39.90
  11   5   1  196.98   33.90
 -11  -5   1  180.18   37.40
  11  -5  -1  185.48   33.50
  11  -5   2   14.70    7.70
 -11   5   2   22.60   14.00
 -11  -5  -2    1.20   13.00
 -11   5   2   -4.00    3.60
  11   5  -2    1.80    4.70
  11   5   2    2.40    6.90
 -11  -5   2   -3.20    4.40
  11  -5  -2    9.00    5.50
 -11   5  -2    3.00   11.60
 -11   5  -2   -2.70   15.10
 -11  -5   2   -8.40   13.10
  11   5  -3   94.79   18.90
 -11   5   3  135.19   25.60
 -11  -5  -3  104.29   24.10
 -11  -5  -3   60.39   20.50
  11  -5   3  112.19   20.40
  11  -5  -3   97.99   19.30
 -11   5  -3  127.19   24.20
  11   5   3  123.69   21.30
 -11   5  -3  115.99   23.40
 -11  -5   3   99.09   23.50
  11  -5   4   30.70   11.10
 -11   5   4   11.20   16.60
 -11  -5  -4   19.50   13.30
 -11  -5  -4   80.59   15.80
  11   5  -4   54.49   10.60
 -11  -5   4   51.09   13.40
 -11   5  -4   47.10   14.30
  11  -5  -4   45.70   10.70
  11   5   4   68.29   13.40
 -11   5  -4    9.00   15.30
 -11  -5  -5  165.28   33.40
 -11   5  -5  148.29   32.10
 -11   5  -5  193.78   33.60
 -11  -5   5  195.28   32.60
  11  -5   6   30.10    7.60
 -11  -5  -6   36.40    8.10
 -11   5   6   16.80    7.60
 -11  -5   6   16.60    7.30
  11  -5  -6   29.00    8.30
 -11  -5   6   -0.30    5.30
 -11   5  -6   11.90    7.70
 -12   5   0  137.79   27.60
 -12  -5   0  168.18   28.60
  12  -5   0  105.59   21.20
  12   5   0  112.39   20.70
 -12  -5   0   93.19   27.90
  12  -5   1   22.80    8.30
 -12  -5  -1   14.30   14.80
  12  -5  -1   22.80    6.70
 -12  -5   1   16.20   15.20
  12   5   1   10.40    6.60
 -12  -5   1   35.00   15.10
 -12   5  -1    9.00   16.00
 -12  -5  -2   39.50   13.80
  12  -5   2   31.50   10.40
  12   5  -2   34.80    8.30
 -12   5  -2   22.80   17.60
 -12  -5   2   26.30   15.60
  12  -5  -2   33.30    8.50
  12   5   2   32.80    9.70
 -12   5   3   10.90    9.80
  12   5  -3   11.40    6.50
 -12  -5  -3    0.10   12.80
  12  -5   3   30.40   10.00
  12   5   3   17.00    7.40
 -12   5  -3   17.50   11.40
 -12  -5   3    2.80    4.60
  12  -5  -3   14.10    6.40
 -12  -5   3   -0.20   12.10
 -12   5  -3    9.00   16.70
 -12   5   4   67.09   15.60
 -12  -5  -4   47.70   14.70
 -12  -5  -4   60.09   13.60
 -12  -5   4   50.69   14.00
 -12   5  -4   37.40   16.70
 -12   5  -4   51.19   13.20
 -12  -5  -5    2.80    9.60
 -12   5   5   -2.10    8.00
  12  -5   5    1.60    8.20
 -12  -5   5   10.70    8.90
 -12   5  -5    3.90    7.40
 -12  -5   5   -4.30    6.90
 -13   5   0   -6.40   13.80
 -13  -5   0   -6.80   13.70
  13   5   0    2.90    6.00
  13  -5   0    8.30    6.20
  13  -5   1   41.20    9.70
 -13  -5  -1   21.90   15.60
  13   5   1   41.20    9.30
 -13  -5   1    4.10   16.50
 -13  -5   1   48.90   13.40
 -13   5  -1   15.20   17.20
  13  -5  -1   35.80    8.70
 -13  -5  -2   -5.50   12.90
  13  -5   2    1.10    7.70
  13   5   2    0.00    7.20
 -13   5  -2    3.60   16.60
  13  -5  -2    1.40    5.60
 -13  -5   2   -9.80    5.70
 -13  -5   2    8.50   13.80
 -13   5   3   38.00   12.90
 -13  -5  -3   31.20   10.70
 -13   5  -3   23.90   12.90
 -13  -5   3    7.10   12.70
 -13  -5  -4   12.60    9.10
 -13   5   4   29.50    9.70
 -13  -5   4   10.20    8.00
 -13   5  -4   14.90   11.90
 -13  -5   4    3.40    6.50
  13  -5   5    9.50    5.20
 -13  -5   5    2.70    5.70
 -13  -5   5    2.50    5.80
 -14   5   0    4.00   13.30
 -14  -5   0   17.10   10.30
 -14  -5  -1   17.20   15.00
 -14  -5   1   46.70   14.60
 -14   5  -1   30.30   16.60
 -14  -5   1   48.80   15.30
 -14  -5  -2   14.20    9.70
 -14  -5   2   -1.00   14.30
 -14   5  -2   21.60   15.60
 -14  -5   2   -3.50    6.90
 -14  -5  -3  -16.70    9.30
 -14   5  -3    0.80   13.10
 -14  -5   3   -8.00    8.00
 -14  -5   3    6.90    6.60
 -14  -5  -4   -1.50    5.90
  14  -5   4    8.70    5.70
 -14  -5   4    7.90    7.10
 -14   5  -4   -5.00    9.70
 -14  -5   4    0.50    5.80
 -15  -5   0   12.20   12.00
 -15  -5  -1   -2.20   11.10
 -15   5  -1    8.40    9.20
 -15  -5  -2    1.80    7.90
 -15  -5   2    7.70   14.00
 -15   5  -2   11.40    8.90
 -15  -5  -3   13.60    7.00
 -15   5  -3    0.00    7.40
   0  -6   0 1383.76  231.48
   0   6   0 1365.76  231.48
   0  -6  -1  418.16   74.49
   0   6   1  444.96   73.39
   0  -6   1  435.16   73.09
   0   6  -1  412.66   73.29
   0  -6  -2  237.98   41.90
   0  -6   2  240.38   38.40
   0   6   2  226.98   40.40
   0   6  -2  197.78   38.30
   0  -6  -3   -5.60   10.10
   0   6  -3   -4.00    6.30
   0  -6  -3    2.00    6.00
   0   6   3    7.10    9.60
   0   6   4   87.29   22.60
   0   6  -5   30.00   12.70
   0   6   5   28.30   11.60
   0   6  -5   12.60   11.00
   0   6  -5   21.30   11.00
   0  -6  -5    7.70   10.70
   0  -6  -5   27.10   11.40
   0   6   5   22.20   10.00
   0  -6  -5   19.70   10.90
   0  -6  -6  128.39   25.00
   0   6  -6   69.59   27.50
   0  -6  -6  120.49   24.40
   0   6   6  114.99   24.00
   0   6   6  153.38   25.60
   0  -6  -6  145.39   25.70
   0   6  -6  130.79   24.90
   0  -6  -6  119.99   24.60
   0   6  -6   80.69   23.90
   0  -6  -7   36.50   12.60
   0  -6  -7   66.59   14.10
   0   6  -7   38.40   13.30
   0   6   7   38.30   12.10
   0  -6  -7   30.50   14.20
   0   6  -7   59.59   12.90
   0  -6  -7   23.30   13.40
   0  -6  -8   13.80    7.70
   0  -6  -8    8.20    5.70
   0   6  -8   23.70    9.70
   0   6   8    0.60    9.20
   0   6  -8   14.60    6.50
   0  -6  -8   11.10    6.90
   1   6   0   -2.60    6.40
   1  -6   0   11.40    8.20
  -1  -6   0    7.80    6.80
   1  -6   1  796.82  135.49
  -1   6   1  814.82  134.59
  -1  -6  -1  800.42  136.09
   1   6  -1  809.12  134.39
   1   6  -1  805.42  134.79
   1   6   1  790.92  135.69
  -1  -6   1  790.02  134.79
   1  -6  -1  825.92  136.39
  -1   6  -1  763.52  135.59
  -1   6   2  148.49   28.50
   1   6  -2  165.28   27.00
   1  -6   2  162.08   28.50
  -1  -6  -2  165.18   30.90
   1  -6  -2  145.89   30.40
   1   6   2  172.68   30.10
   1  -6  -2  127.99   27.90
   1  -6  -2  142.29   27.00
  -1   6   3  311.07   58.09
   1   6  -3  348.47   55.79
   1  -6  -3  312.87   55.59
   1   6   3  360.86   58.99
   1  -6  -3  273.37   58.79
   1   6  -4   76.49   15.20
  -1  -6  -4   70.39   18.00
  -1   6   4  111.69   21.20
   1   6   4   76.09   18.10
   1  -6  -4   48.00   17.40
   1  -6  -4   61.29   14.90
   1   6   4   61.39   19.30
  -1  -6  -5   75.49   18.40
  -1   6   5   81.29   17.90
  -1   6   5   96.89   19.50
   1   6  -5   81.69   18.40
  -1  -6  -5   61.09   19.50
  -1  -6  -5   99.19   19.10
   1   6  -5  104.19   19.00
   1   6   5   90.59   19.10
  -1   6  -5   46.00   17.70
  -1   6  -5   90.79   18.80
   1  -6  -5   71.09   19.40
  -1   6  -5   69.49   18.40
   1  -6  -5   93.79   19.10
   1   6   5   95.29   18.70
   1  -6  -5  102.29   19.30
  -1   6   6   71.49   16.10
  -1   6   6   52.89   14.40
  -1   6   6   39.10   14.70
   1   6  -6   54.99   15.80
  -1  -6  -6   49.90   15.30
  -1  -6  -6   31.40   15.40
  -1  -6  -6   61.79   15.80
  -1  -6  -6   61.29   16.10
   1   6  -6   77.09   16.00
   1  -6  -6   69.79   16.30
   1   6   6   57.29   14.30
   1  -6  -6   72.99   16.50
  -1   6  -6   46.90   16.40
   1   6   6   58.79   15.80
  -1   6  -6   37.70   14.90
   1  -6  -6   74.49   16.80
  -1   6  -6   62.49   16.70
   1   6  -7   16.40    8.90
  -1   6   7   22.70   12.30
  -1   6   7   13.70   10.80
  -1  -6  -7   17.10   10.40
   1   6  -7   21.30    8.30
  -1  -6  -7    1.80   11.80
  -1  -6  -7   10.60   11.80
  -1  -6  -7   32.10   12.60
   1  -6  -7   13.60   12.50
  -1   6  -7    8.50   11.00
   1  -6  -7   17.30   11.60
   1  -6  -7    7.10   10.80
   1   6   7   20.40   11.60
  -1   6  -7   30.00   12.10
  -1   6  -7   11.50    8.90
   1   6  -8    5.10    7.50
   1   6  -8   -5.90    8.50
  -1   6   8    7.30    5.70
  -1  -6  -8    1.90    6.40
  -1  -6  -8    1.70    6.20
  -1   6   8    1.70    7.00
  -1  -6  -8    1.90    8.00
  -1  -6  -8    6.60    6.90
   1   6   8   -7.20    8.30
  -1   6  -8   -6.20    7.20
  -1   6  -8    5.20    9.40
  -1   6  -8   10.80    9.10
   1  -6  -8    5.50    8.00
   1  -6  -8    8.90    8.40
   1  -6  -8    3.50    9.60
  -2   6   0  900.91  137.79
   2  -6   0  780.62  137.89
  -2  -6   0  830.42  139.19
   2   6   0  791.92  138.99
   2   6   0  801.82  137.79
   2  -6   0  812.42  139.69
  -2  -6  -1  196.08   31.30
   2   6  -1  160.18   27.60
   2   6  -1  157.08   27.90
   2  -6   1  179.68   30.60
   2  -6   1  167.38   27.90
   2  -6  -1  166.68   31.40
  -2   6  -1  130.79   29.20
   2  -6  -1  153.78   27.80
   2   6   1  193.38   31.10
   2   6   1  147.09   27.70
   2   6  -2  172.28   28.80
   2  -6   2  144.09   29.10
   2  -6   2  172.68   31.10
   2  -6  -2  192.88   30.40
   2   6   2  161.28   28.70
   2   6   2  186.08   32.40
   2  -6  -2  160.88   32.70
   2  -6  -2  152.48   28.90
   2   6  -3  349.77   54.79
   2  -6   3  290.87   56.49
   2   6   3  297.67   54.89
   2  -6  -3  328.17   54.79
   2  -6  -3  302.77   58.59
   2   6   3  322.77   58.09
   2   6  -4   27.20   14.60
  -2   6   4   44.60   11.80
  -2  -6  -4   73.39   13.50
  -2   6   4   41.20   13.70
   2   6  -4   46.50   11.60
   2  -6  -4   35.80   18.10
   2   6   4   13.80   19.20
   2  -6  -4   45.60   13.00
   2   6   4   63.79   14.40
  -2   6  -4   44.30   13.60
   2  -6  -4   40.90   13.30
   2  -6  -4   49.00   10.90
  -2  -6  -5  200.68   37.10
   2   6  -5  241.38   38.10
  -2   6   5  210.58   38.20
   2   6  -5  202.18   37.20
  -2   6   5  211.38   37.00
   2  -6   5  189.88   37.20
  -2  -6  -5  215.88   38.00
  -2  -6  -5  202.78   37.40
  -2   6  -5  210.88   37.70
   2   6   5  239.28   38.10
  -2   6  -5  157.68   36.80
  -2  -6   5  188.98   37.10
   2   6   5  184.58   37.10
   2  -6  -5  211.18   37.90
   2  -6  -5  201.88   37.90
  -2   6  -5  194.88   37.30
  -2  -6  -6  104.29   23.40
  -2  -6  -6  114.19   22.70
  -2  -6  -6   87.39   22.90
   2   6  -6   98.49   23.50
  -2   6   6   67.89   23.10
  -2  -6  -6  119.69   23.60
  -2   6   6  128.89   24.40
  -2   6   6   88.09   22.10
   2   6  -6  116.49   23.10
  -2   6  -6  113.49   24.00
  -2   6  -6  139.89   24.50
   2  -6  -6  115.49   24.70
  -2  -6   6   93.49   23.10
   2   6   6  124.49   23.50
   2  -6  -6  123.39   24.00
   2   6   6  116.19   23.40
   2  -6  -6  139.79   24.30
  -2   6  -6  143.19   25.20
  -2  -6  -7   14.50   11.60
   2   6  -7   22.40   12.80
  -2  -6  -7   32.30   13.40
  -2  -6  -7    1.30    9.30
  -2  -6  -7   25.00   12.30
   2   6  -7   15.20   10.40
  -2   6   7   40.70   11.90
  -2   6   7   22.60   13.30
  -2   6  -7   31.80   10.20
   2  -6  -7   33.00   12.30
   2   6   7   41.00   12.60
  -2   6  -7   42.30   11.10
   2  -6  -7   25.80   13.00
  -2   6  -7   33.20   12.90
   2  -6  -7   31.40   13.40
   2   6   7   15.90   11.70
  -2   6   8   24.30   10.20
   2   6  -8  -10.30    8.70
   2   6  -8    7.30    5.20
  -2  -6  -8   11.10    7.30
  -2  -6  -8   -0.30    6.20
  -2  -6  -8    5.90    4.50
  -2   6  -8    2.90    7.50
   2   6   8   -3.00    5.80
   2  -6  -8   -9.20    7.50
  -2   6  -8   -4.00    8.70
   2   6   8   -1.50    7.50
  -2   6  -8    0.30    8.50
   2  -6  -8   18.90    7.40
   2  -6  -8    4.40    8.20
   3   6   0  203.28   36.20
   3  -6   0  222.48   39.80
   3  -6   0  220.88   36.50
   3   6  -1   63.69   14.10
   3  -6   1   87.59   14.20
   3  -6   1   55.59   16.80
   3   6  -1   77.99   13.60
   3  -6  -1   78.39   13.90
   3  -6  -1   81.39   18.60
   3   6   1   77.29   13.90
   3   6   1   69.59   19.00
  -3   6  -1   63.59   15.90
   3  -6   2  609.44  107.99
   3   6  -2  650.13  105.79
   3  -6   2  624.14  105.89
   3  -6   2  656.23  107.99
   3   6   2  596.94  105.89
   3   6   2  612.34  109.09
   3  -6  -2  670.43  109.19
   3  -6  -2  628.34  105.89
   3  -6   3    6.20    8.50
   3  -6   3   -5.00   12.80
   3   6  -3    7.10    5.70
   3  -6   3   -2.80    6.50
   3  -6  -3    7.10    6.50
   3   6   3   11.40   11.40
   3  -6  -3    0.40   11.50
   3   6   3    9.10    6.50
  -3  -6  -4  124.19   26.50
  -3   6   4  118.99   25.70
   3   6  -4  123.19   26.20
  -3   6   4  155.78   27.50
   3   6  -4  144.59   25.80
  -3  -6   4  142.59   27.00
   3  -6  -4  127.59   31.30
   3  -6  -4  119.39   25.30
  -3   6  -4  154.98   26.80
  -3   6  -4  164.68   31.00
   3   6   4  160.48   27.00
  -3   6  -4  167.08   27.60
   3  -6  -4  138.79   26.70
   3  -6   5  386.16   65.59
   3   6  -5  437.86   65.59
  -3  -6  -5  427.66   65.89
  -3   6   5  371.36   65.79
  -3   6   5  344.47   64.99
  -3  -6  -5  352.56   65.79
   3   6  -5  351.46   65.19
   3   6  -5  397.26   65.99
  -3  -6  -5  337.17   65.69
  -3   6  -5  362.86   66.09
   3   6   5  376.36   65.79
   3  -6  -5  371.86   65.59
   3  -6  -5  427.16   66.49
   3  -6  -5  403.56   65.99
  -3   6  -5  377.56   66.09
  -3   6  -5  388.26   65.99
  -3  -6   5  367.66   65.59
   3   6   5  332.77   65.09
  -3  -6  -6  143.09   27.20
  -3   6   6  124.69   24.80
  -3  -6  -6   96.19   25.20
  -3  -6  -6  142.69   25.70
  -3  -6  -6  123.19   25.80
  -3   6   6  123.59   26.40
  -3   6   6  127.89   25.50
   3   6  -6  148.79   26.50
   3   6  -6  136.39   26.10
  -3   6  -6  118.39   27.60
   3   6   6   98.39   25.20
   3  -6  -6  148.69   26.70
   3  -6  -6  162.38   27.90
   3  -6  -6  100.89   25.60
  -3   6  -6   98.59   26.00
  -3  -6   6  112.99   26.20
  -3   6  -6  168.08   26.40
   3   6  -7   31.70   12.80
  -3  -6  -7   10.90   12.40
  -3  -6  -7   48.10   15.80
  -3   6   7   31.30   11.10
  -3  -6  -7   40.70   10.80
  -3   6   7   27.30   11.10
  -3  -6  -7   46.60   11.30
   3   6  -7   34.90   10.60
  -3   6  -7   22.90   13.80
   3  -6  -7   32.30   13.20
   3   6   7   23.30   10.00
  -3   6  -7   26.40   11.10
   3  -6  -7   38.50   12.40
   3   6   7   26.20   11.70
   3  -6  -7   19.30   12.80
  -3   6  -7   26.00   11.80
  -3   6   8    5.70    9.50
   3   6  -8    7.80    6.00
  -3  -6  -8   -9.40    6.10
  -3  -6  -8   10.40    8.50
  -3   6  -8   21.80    7.30
  -3   6  -8   -1.60    5.00
   3   6   8   10.30    5.90
   3  -6  -8   -4.40    5.60
   3  -6  -8   -8.60    9.40
   4   6   0   49.20   10.10
   4  -6   0   50.29   15.80
   4   6   0   45.50   15.30
   4  -6   0   64.09   10.60
   4   6  -1   96.29   16.80
   4  -6   1  108.69   22.10
   4  -6   1   89.39   17.20
   4  -6   1   90.29   18.50
   4  -6  -1   91.19   21.70
   4   6   1   89.49   17.10
   4  -6  -1  100.89   17.20
   4   6   1  107.59   22.80
   4  -6   2  723.83  124.59
   4  -6   2  767.72  126.79
   4  -6   2  829.42  127.59
   4   6   2  735.73  127.89
   4   6   2  708.03  124.49
   4  -6  -2  750.82  124.59
   4  -6  -2  715.43  127.69
   4  -6   3  118.79   25.20
   4   6  -3  109.29   20.40
   4  -6   3  113.09   20.80
   4  -6   3  156.48   27.00
   4   6   3   73.99   24.50
   4  -6  -3  110.09   20.60
   4   6   3   99.99   20.70
   4  -6  -3  140.29   27.00
  -4   6   4  180.28   29.70
  -4   6   4  148.99   25.40
  -4  -6  -4  179.48   29.10
   4   6  -4  152.28   27.60
   4   6  -4  162.88   28.70
  -4   6   4  167.68   28.20
  -4   6  -4  170.88   30.00
  -4   6  -4  199.08   30.00
  -4  -6   4  153.58   29.10
  -4  -6   4  126.89   25.70
   4  -6  -4  148.49   27.70
  -4   6  -4  147.19   28.60
  -4   6  -4  154.38   30.70
   4  -6  -4  193.28   29.20
  -4   6  -4  150.98   29.20
   4   6   4  161.38   28.30
  -4  -6   4  178.98   29.70
   4  -6   5  323.77   56.39
  -4  -6  -5  306.37   55.99
   4   6  -5  294.17   56.59
   4   6  -5  341.47   55.49
  -4   6   5  335.77   56.49
  -4   6   5  298.07   55.39
  -4   6   5  303.97   56.19
  -4  -6   5  309.07   55.89
   4  -6  -5  314.87   56.09
  -4   6  -5  276.97   56.69
   4   6   5  258.27   55.09
   4  -6  -5  366.36   56.39
   4  -6  -5  354.06   55.89
  -4   6  -5  341.97   56.99
  -4   6  -5  349.17   56.29
  -4   6  -5  293.67   56.29
   4   6  -6  268.87   46.70
  -4  -6  -6  277.57   46.90
  -4   6   6  296.67   47.20
   4  -6   6  237.78   45.80
  -4   6   6  246.28   46.90
  -4   6   6  236.68   45.30
   4   6  -6  305.07   48.60
   4  -6  -6  264.47   46.60
   4  -6  -6  219.38   46.70
   4   6   6  235.58   46.60
  -4  -6   6  276.87   47.00
   4  -6  -6  302.37   47.40
   4   6   6  230.38   45.90
  -4   6  -6  208.98   46.50
  -4   6  -6  249.38   45.90
  -4   6   7    9.70   12.90
  -4  -6  -7   34.30    9.90
  -4  -6  -7    7.50    8.00
   4   6  -7    8.90   11.00
  -4   6   7   21.30   13.30
   4   6   7   18.10   11.30
  -4   6  -7   23.40    9.80
  -4   6  -7   10.30    9.90
   4   6   7   14.80    9.50
   4  -6  -7   27.50    9.60
   4  -6  -7   25.60    9.40
   4  -6  -7   16.30   10.50
  -4  -6  -8    7.70    7.00
  -4  -6  -8   19.80    7.20
   4   6  -8   12.20    6.70
  -4   6   8   13.70    7.40
   4  -6  -8   16.50    6.80
  -4   6  -8   15.90    6.20
   4  -6  -8    9.90    9.40
  -4   6  -8   11.70    7.10
   4   6   8    6.20    7.60
   5  -6   0    5.20    4.00
   5   6   0    1.90    2.90
   5  -6   0   19.40   11.80
   5   6   0  -25.40   12.80
   5  -6   1  174.98   31.10
   5  -6   1  184.88   32.60
   5  -6   1  178.38   35.20
   5   6  -1  179.08   30.50
   5   6   1  180.78   31.00
   5  -6  -1  144.89   35.10
   5  -6  -1  185.98   30.80
   5   6   1  166.88   36.10
   5  -6   2  280.37   53.89
   5  -6   2  291.57   55.99
   5  -6   2  302.57   51.79
   5   6   2  289.37   51.69
   5  -6  -2  281.87   56.09
   5   6   2  359.56   57.79
   5  -6  -2  319.27   51.69
   5  -6   3  143.79   34.60
   5  -6   3  135.39   33.90
   5  -6   3  203.88   31.20
   5  -6  -3  164.48   37.30
   5  -6  -3  205.78   31.10
   5   6   3  207.08   31.40
   5   6   3  122.29   35.10
  -5   6  -3   99.69   33.40
   5   6  -4   20.20    7.60
  -5   6   4   23.50    9.80
  -5   6   4   22.20   12.10
  -5   6   4   27.00   11.60
  -5  -6  -4   35.00   10.00
  -5  -6  -4   23.60   10.20
   5   6  -4   19.60   11.30
   5  -6   4   27.90   10.10
  -5  -6   4   41.80   11.40
  -5   6  -4   38.70   12.90
   5   6   4    7.10    8.30
  -5  -6   4   35.90   12.70
   5  -6  -4   21.80    9.80
   5   6   4   31.40    9.70
   5  -6  -4   36.30   10.90
  -5   6  -4   24.00   10.60
  -5   6  -4   28.30   11.70
  -5   6  -4   21.70   10.40
   5  -6   5   30.60   11.90
  -5   6   5    7.90   12.90
  -5   6   5   14.10   11.60
   5   6  -5   25.10   10.20
  -5   6   5   -5.00    9.30
  -5  -6  -5   13.90   10.60
   5   6  -5    5.80   12.10
  -5  -6   5   33.00   11.80
  -5   6  -5   -5.80   10.40
  -5  -6   5   16.00   12.20
   5  -6  -5   19.70   10.40
  -5   6  -5   13.40   10.10
   5  -6  -5    8.10   10.20
  -5   6  -5    4.10   11.30
   5   6   5   10.90    9.60
   5  -6  -5   13.30   10.70
  -5   6   6  125.99   22.40
  -5  -6  -6  114.69   22.70
   5  -6   6   71.79   21.10
  -5   6   6   60.49   22.20
  -5  -6  -6   84.79   21.10
   5   6  -6  130.89   22.70
   5   6  -6   72.19   20.60
  -5   6  -6  154.78   23.20
   5  -6  -6   52.39   20.20
  -5   6  -6  107.99   22.40
   5  -6  -6  146.89   23.20
   5   6   6  163.58   23.30
  -5  -6  -7   18.40   12.20
  -5   6   7   64.59   15.50
   5   6  -7   52.09   13.20
  -5   6   7   38.00   11.90
  -5  -6  -7   69.29   14.80
   5  -6  -7   36.00   11.80
   5  -6  -7   38.60   13.50
  -5   6  -7   16.00   11.80
   5  -6  -7   49.40   12.30
  -5   6  -7   48.70   13.70
  -5  -6  -8   26.10    7.30
  -5   6   8   22.40    7.20
  -5  -6  -8   26.70    9.50
   5   6  -8   12.10    8.40
   5  -6  -8   30.60    9.50
  -5   6  -8   -3.10    8.10
   5  -6  -8   16.00    6.70
  -5   6  -8   20.80    6.40
   6   6   0   74.69   21.20
   6   6   0   73.19   14.60
   6  -6   0  101.69   22.10
   6  -6   0   93.99   15.10
   6  -6   1   89.89   25.50
   6  -6   1  132.99   20.80
   6   6   1  114.59   20.30
   6  -6  -1  114.49   25.60
   6  -6  -1  105.49   20.20
   6   6   1  106.29   26.20
   6  -6   2  415.96   70.99
   6  -6   2  420.96   75.69
   6   6   2  437.86   77.29
   6  -6  -2  353.46   75.59
   6  -6  -2  423.06   70.89
   6   6   2  427.46   71.09
   6  -6   3   30.00    9.20
  -6  -6  -3    6.80    9.70
  -6  -6  -3   27.50   11.50
  -6   6   3   21.30   11.80
   6  -6  -3   21.60   17.50
  -6   6  -3   28.50    9.80
   6   6   3   34.50   10.10
  -6   6  -3   31.40   10.90
  -6  -6   3   30.70   11.30
   6  -6  -3   51.69    9.50
  -6   6  -3   31.20   12.00
  -6   6  -3   36.60   13.90
   6   6   3   28.30    8.20
   6   6  -4   17.60    9.50
   6  -6   4   23.50    9.80
  -6  -6  -4   31.50   11.00
  -6   6   4   50.89   10.70
  -6   6   4   52.59   15.10
  -6   6   4   40.70   11.70
  -6  -6  -4   38.20   12.00
   6  -6  -4   47.30   12.40
   6  -6  -4   35.80   10.10
  -6   6  -4   41.90   14.10
   6   6   4   34.00   12.40
  -6   6  -4   21.70   12.90
   6   6   4   40.10   11.70
  -6  -6   4   50.59   12.80
  -6   6  -4   36.80   14.00
  -6   6  -4   28.40   14.40
  -6  -6  -5  111.19   23.70
  -6   6   5   80.09   23.40
  -6   6   5   69.19   23.60
  -6   6   5   96.49   21.60
   6   6  -5  104.79   23.80
  -6   6   5  122.79   18.60
   6   6  -5   93.99   21.00
  -6  -6  -5  120.19   22.70
   6  -6  -5   89.99   22.50
  -6   6  -5   66.49   22.20
  -6   6  -5   63.49   22.00
  -6  -6   5  126.59   24.20
   6  -6  -5   89.59   22.10
   6   6   5   95.99   22.20
  -6   6  -5  144.19   24.60
   6  -6  -5  107.79   24.00
  -6   6   6   45.90   13.00
  -6  -6  -6   39.40   11.90
   6  -6   6   40.30   12.90
   6   6  -6   39.00   14.10
   6   6  -6   52.69   13.30
  -6   6   6   26.00   15.10
  -6   6  -6   34.50   12.60
   6  -6  -6   27.20   12.20
  -6   6  -6   44.50   14.20
  -6   6  -6    4.00   11.90
   6  -6  -6   46.00   12.80
   6  -6  -6   18.70   11.80
  -6  -6  -7    9.40    7.60
   6   6  -7   10.90    9.10
  -6   6   7    3.00    8.10
  -6  -6  -7   -0.30   10.50
  -6   6   7    7.00   11.10
  -6   6  -7   13.50   10.80
   6  -6  -7    1.70   10.70
  -6   6  -7    1.20    9.10
   6  -6  -7   -8.00    8.60
   7   6   0  292.07   54.09
   7  -6   0  242.18   52.99
   7   6   0  273.37   47.40
   7  -6   0  295.47   47.70
   7   6  -1   39.80   18.40
   7  -6   1   55.49   11.60
   7  -6   1   58.39   17.40
   7   6   1   54.99   19.40
   7  -6  -1   38.20   17.90
   7   6   1   60.29   11.20
   7  -6  -1   63.29   11.20
  -7  -6  -2  291.27   54.89
  -7  -6  -2  308.27   55.19
   7  -6   2  315.97   53.99
  -7   6   2  351.06   56.69
   7  -6  -2  246.18   59.19
   7   6   2  326.67   54.19
  -7   6  -2  311.57   55.79
  -7   6  -2  288.97   55.59
  -7  -6   2  285.57   55.29
  -7   6  -2  336.57   56.19
   7  -6  -2  353.36   53.89
   7  -6   3  109.09   23.20
  -7  -6  -3   83.79   23.80
  -7   6   3  106.39   25.10
  -7  -6  -3  110.49   24.00
  -7   6   3  132.79   21.10
  -7  -6  -3  102.99   24.70
   7   6   3  123.99   26.80
  -7  -6   3  103.79   24.80
  -7   6  -3   80.49   24.50
  -7  -6   3  137.49   21.30
  -7   6  -3  126.39   26.80
   7  -6  -3  107.19   23.10
  -7   6  -3   88.89   24.00
  -7   6  -3  117.79   26.40
   7   6   3  131.19   23.60
  -7   6   4    9.90   12.70
  -7   6   4   24.00   12.80
   7  -6   4    9.90    9.50
  -7  -6  -4   24.00   10.70
   7   6  -4   22.00    8.10
  -7   6  -4   16.40   11.60
  -7  -6   4   11.20   10.70
  -7   6  -4   15.00   11.60
   7   6   4   17.80   10.60
  -7   6  -4   -9.10   11.60
   7   6   4   24.70   10.70
   7  -6  -4   20.60    9.50
  -7   6  -4    9.00   12.10
  -7   6   5  285.67   49.20
   7   6  -5  286.87   48.10
  -7  -6  -5  263.97   49.50
  -7  -6  -5  259.07   48.40
  -7   6  -5  268.57   49.10
  -7   6  -5  309.37   50.19
   7  -6  -5  255.27   49.30
   7  -6  -5  223.98   48.40
   7  -6  -5  238.58   47.70
  -7   6  -5  280.37   49.50
  -7  -6   5  306.17   49.60
  -7   6  -5  280.77   49.80
  -7  -6  -6   44.40   12.50
   7  -6   6   28.60   11.80
   7   6  -6   41.00   11.80
  -7   6   6   19.90   13.90
   7   6  -6   36.30   12.20
  -7  -6  -6   54.89   12.10
  -7   6   6   52.19   13.20
   7  -6  -6   30.00   11.30
  -7  -6   6   62.99   15.10
  -7   6  -6   66.89   12.30
   7  -6  -6   37.10   12.00
  -7   6  -6   19.50   12.50
  -7   6  -6   49.00   13.50
  -7  -6   6   12.10    9.20
   7  -6  -6   35.00    9.90
  -7   6   7   24.40    9.30
   7   6  -7   27.80    9.60
  -7   6   7   34.20   10.10
  -7  -6  -7   40.60   12.50
   7  -6  -7   20.20    9.90
  -7   6  -7   26.80    8.80
   7  -6  -7   10.10   11.20
  -7   6  -7   47.90   11.00
  -8   6   0  123.59   27.40
  -8  -6   0  223.58   30.30
   8  -6   0  135.79   25.10
  -8   6   0  126.59   28.20
  -8  -6   0  160.78   28.50
  -8  -6   0  148.09   29.00
   8   6   0  137.19   24.80
  -8  -6   0  155.88   27.50
  -8  -6  -1  146.19   30.60
   8  -6   1  131.79   26.30
  -8   6   1  175.68   25.30
  -8  -6  -1  168.48   29.40
   8   6  -1  126.69   25.50
  -8  -6  -1  157.78   29.30
  -8  -6   1  146.79   29.20
   8   6   1  119.59   26.10
  -8   6  -1  105.59   29.00
  -8  -6   1  155.98   25.40
  -8  -6   1  132.49   29.30
  -8   6  -1  137.19   29.00
  -8  -6   1  125.79   28.40
   8  -6  -1  125.99   26.00
   8  -6   2   44.40    9.80
  -8  -6  -2   45.40   12.40
  -8  -6  -2   39.30   12.70
  -8   6   2   57.29   14.20
   8  -6  -2   27.40    8.80
  -8  -6   2   46.80   13.10
  -8  -6   2   52.09   13.70
  -8   6  -2   30.70   12.80
   8   6   2   31.90    9.30
  -8   6  -2   22.90   13.20
  -8   6  -2   51.89   15.40
  -8   6  -2   36.10   10.50
  -8  -6  -3  155.88   31.20
   8  -6   3  162.78   29.90
  -8  -6  -3  217.18   33.80
  -8   6   3  181.58   32.70
  -8  -6  -3  169.98   30.30
  -8  -6  -3  141.69   30.30
  -8  -6   3  150.78   31.40
   8   6   3  134.29   31.10
   8   6   3  149.19   29.80
  -8   6  -3  216.48   34.60
  -8   6  -3  199.08   32.70
   8  -6  -3  175.48   30.10
  -8   6  -3  159.88   30.50
  -8   6  -3  122.79   31.40
  -8  -6  -4    6.40    8.20
  -8  -6  -4    2.00    9.70
  -8   6   4    4.00   13.50
   8   6  -4    2.50    7.00
   8  -6   4   -9.40    8.80
  -8   6   4    1.90   12.60
  -8   6  -4   20.00    9.10
   8   6   4    5.00    9.50
   8  -6  -4   15.10    8.90
  -8   6  -4   14.80    9.80
  -8  -6   4   14.50   11.80
  -8  -6   4    4.50    4.50
  -8   6  -4   38.70   13.70
  -8   6  -4   24.70   13.10
  -8  -6  -5  -11.00   11.20
   8   6  -5   20.20    9.40
  -8   6   5    5.70   13.70
  -8  -6  -5    7.10    9.00
  -8   6   5   15.00   13.60
   8  -6  -5    3.70    7.40
  -8   6  -5    4.60   12.80
  -8   6  -5   10.70   12.30
  -8   6  -5   16.10   10.80
  -8   6  -5   -2.00   10.70
  -8  -6   5   -3.80    6.60
   8  -6  -5   20.90   10.70
  -8  -6   5    5.50   12.60
  -8   6   6   28.70   11.30
   8  -6   6   19.70   11.10
  -8   6   6   18.30   13.80
  -8  -6  -6   40.50   11.40
  -8  -6   6   59.19   14.00
  -8   6  -6   30.10   13.60
  -8   6  -6   21.00   11.70
  -8   6  -6   24.60   12.00
  -8  -6  -7   -4.10    9.10
  -8   6   7    3.30    6.50
  -8   6   7   -4.00    6.30
  -8  -6  -7    0.90    7.20
  -8   6  -7  -14.50    6.70
  -8   6  -7   -4.60    4.90
   8  -6  -7   -3.30    6.20
   9   6   0  515.85   87.09
  -9  -6   0  520.55   89.49
  -9  -6   0  462.95   88.99
   9  -6   0  543.75   87.29
  -9   6   0  522.85   89.79
  -9  -6   0  528.35   89.19
  -9  -6  -1  212.38   33.80
  -9  -6  -1  162.08   33.60
   9   6  -1  156.18   27.70
   9  -6   1  163.18   28.60
  -9  -6  -1  172.58   31.90
  -9   6  -1  168.78   31.40
  -9  -6   1  154.78   31.30
   9  -6  -1  148.09   28.10
  -9  -6   1  190.98   31.30
   9   6   1  155.78   28.30
  -9  -6   1  162.38   31.60
  -9   6  -1  149.49   32.20
  -9  -6  -2   47.20   14.80
   9   6  -2   46.90   10.70
  -9   6   2   80.29   17.00
   9  -6   2   59.79   12.30
  -9  -6  -2   66.19   16.40
   9   6   2   49.50   12.00
  -9  -6   2   65.19   15.70
  -9   6  -2   66.59   16.10
  -9  -6   2   54.59   16.10
   9  -6  -2   43.90   11.40
  -9   6  -2   50.69   17.70
  -9   6   3   78.99   18.50
  -9  -6  -3   59.69   15.20
   9   6  -3   57.39   12.60
   9  -6   3   81.79   14.80
  -9  -6  -3   70.39   17.40
  -9   6  -3   64.69   19.40
  -9   6  -3   62.99   17.50
  -9   6  -3   80.19   19.30
   9  -6  -3   57.69   14.00
   9   6   3   60.29   14.30
  -9   6  -3   54.89   14.30
  -9  -6   3   28.40   16.10
  -9  -6  -4   21.50   11.90
  -9   6   4    4.00   14.70
   9  -6   4   30.70   11.00
  -9  -6  -4   45.00   12.80
  -9  -6  -4   28.30    8.90
   9   6  -4   38.40   10.10
  -9   6  -4   19.90   15.50
   9   6   4   11.60    9.10
  -9   6  -4    8.90    9.70
   9  -6  -4   23.90    9.50
  -9  -6   4   30.60   13.30
  -9   6  -4   23.20   12.60
  -9   6  -4   19.70   14.40
  -9   6   5   41.00   12.40
  -9  -6  -5   36.40   14.50
  -9   6   5   48.80   13.50
   9   6  -5   46.30   11.50
   9  -6  -5   30.10   12.20
  -9   6  -5   25.40   12.90
  -9   6  -5   14.70   14.20
  -9   6  -5   39.70   11.70
  -9   6  -5   17.10   15.30
   9  -6  -5   45.10   11.60
  -9  -6   5   35.00   15.10
  -9  -6  -6   18.50    8.50
  -9   6   6    6.40    8.80
  -9   6   6    4.20    7.50
   9  -6   6    7.90    8.40
  -9  -6   6   18.90    8.80
  -9  -6   6  -16.40    8.10
  -9   6  -6    1.20    9.40
  -9   6  -6   19.60    8.40
  -9  -6  -7   11.20    6.50
  -9   6   7    4.20    5.80
  -9   6  -7   -2.30    6.40
   9  -6  -7    4.70    7.50
  10  -6   0   51.19   12.10
  10   6   0   70.09   11.70
 -10  -6   0   60.19   17.40
 -10  -6   0   46.80   17.80
 -10   6   0   52.19   17.70
 -10  -6  -1  137.99   30.10
  10  -6   1  159.78   26.80
 -10  -6  -1  173.88   36.90
  10   6  -1  139.09   25.50
 -10  -6   1  227.28   31.80
  10  -6  -1  139.09   26.10
 -10  -6   1  161.78   30.20
 -10   6  -1  130.39   30.50
 -10   6  -1  133.69   28.80
  10   6   1  134.99   26.10
 -10  -6  -2   40.20   13.90
 -10   6   2   26.30   14.90
  10   6  -2   24.50    6.80
  10  -6   2   12.20    8.70
 -10  -6   2   19.20   13.60
 -10  -6   2   31.10   13.20
  10  -6  -2   22.50    7.70
 -10   6  -2   18.80   15.90
  10   6   2   31.60    8.70
 -10   6  -2   33.20   12.70
 -10  -6  -3   20.90   12.20
  10   6  -3   10.50    5.60
  10  -6   3   13.40    8.70
 -10  -6  -3    3.20    8.90
 -10   6   3  -11.50   13.30
 -10   6  -3   17.50   12.30
 -10  -6   3   12.10   12.70
  10  -6  -3    4.90    7.60
 -10  -6   3    0.90    3.40
 -10   6  -3    7.30   14.80
  10   6   3    7.40    8.40
 -10  -6  -4   54.29   15.20
  10   6  -4   49.20   11.60
 -10  -6  -4   44.30   14.80
  10  -6   4   54.09   12.80
 -10   6   4   22.60   17.20
  10  -6  -4   69.69   12.70
 -10   6  -4   43.90   15.20
 -10   6  -4   47.30   17.20
 -10  -6   4   26.00   15.10
  10   6   4   42.20   12.40
 -10   6   5  -17.30    8.60
 -10  -6  -5   -1.20   11.50
 -10   6  -5   -5.80   11.80
 -10  -6   5   -5.80   11.80
 -10   6  -5   17.00   11.10
 -10  -6   5   10.30    8.90
 -10   6   6   11.50    8.10
  10  -6   6   -1.30    7.40
 -10  -6  -6   -3.20    7.00
  10  -6  -6    7.30    6.90
 -10  -6   6   -5.80    5.50
 -10   6  -6    8.10    6.50
 -10  -6   6   -0.80    9.70
  11   6   0   11.20    5.50
 -11   6   0    4.80   13.90
  11  -6   0    9.60    6.20
 -11  -6   0    7.50   16.70
 -11  -6   0   -0.30   13.10
  11  -6   1   36.20   10.60
 -11  -6  -1   42.70   18.60
  11   6  -1   46.10    9.20
  11   6   1   40.40    9.90
  11  -6  -1   36.00    9.60
 -11  -6   1   46.90   16.40
 -11  -6   1   50.29   17.10
 -11   6  -1   34.80   17.30
  11   6  -2    3.20    5.40
 -11  -6  -2   -3.90   12.50
  11  -6   2    9.30    7.80
  11   6   2   13.80    7.70
 -11  -6   2   -2.40   11.50
  11  -6  -2    7.30    6.20
 -11  -6   2    2.40    9.20
 -11   6  -2   -0.60   12.00
 -11   6  -2   21.60   16.00
 -11  -6   2   -2.70    4.10
 -11   6   3   -4.80   14.30
  11  -6   3    9.50    9.20
  11   6  -3   11.70    6.10
 -11  -6  -3    8.20   12.00
  11  -6  -3    1.00    5.60
 -11  -6   3   18.40   12.80
 -11  -6   3   -3.20    4.20
 -11   6  -3    0.40   15.30
 -11   6  -3    8.50   12.10
  11   6   3    0.20    8.60
  11  -6   4   21.20   11.00
 -11  -6  -4   37.20   12.50
 -11  -6  -4   14.20   10.90
 -11   6   4   24.70   11.50
  11   6  -4   14.30    7.30
 -11   6  -4    3.90   13.70
  11  -6  -4   28.20    8.10
 -11  -6   4   19.30   13.20
 -11  -6   4    5.10    6.10
  11   6   4   13.40    9.10
 -11   6  -4   37.90   10.60
 -11  -6  -5    3.20   11.10
 -11   6   5   21.50   10.30
  11  -6   5   23.60   10.50
 -11  -6   5   18.50   10.20
 -11   6  -5   16.60    8.40
 -11  -6   5   10.40    8.80
 -11   6   6   23.10    8.60
 -11  -6  -6   29.40    9.40
  11  -6   6   29.20    8.70
  11  -6  -6   24.40    7.80
 -11  -6   6   10.30    9.80
 -11   6  -6   28.30    7.80
 -12  -6   0   73.79   26.10
 -12  -6   0   51.59   20.00
 -12   6   0   57.19   20.70
  12  -6   0   78.29   15.10
  12   6   0   89.59   14.90
 -12  -6  -1   32.10   16.50
  12  -6   1   44.20    9.60
  12   6  -1   29.40    8.40
  12   6   1   37.50    9.60
 -12   6  -1   36.40   17.00
 -12  -6   1   30.70   16.90
 -12  -6   1   27.40   14.80
  12  -6  -1   27.20    8.60
 -12  -6  -2   24.40   14.20
  12  -6   2    6.30    6.80
  12   6  -2   15.40    6.20
 -12   6  -2   20.40   12.70
  12   6   2   13.40    7.60
 -12  -6   2   -1.80    8.50
  12  -6  -2   13.30    5.90
 -12  -6   2   18.80   14.70
 -12  -6  -3    7.60   13.00
 -12   6   3   32.10   15.50
  12  -6   3   51.49   11.90
  12   6  -3   26.60    8.20
  12   6   3   41.00   10.60
 -12   6  -3   52.79   12.30
 -12  -6   3   35.00   11.50
 -12  -6   3   13.90    9.80
 -12   6  -3   55.59   14.40
  12  -6  -3   27.90    8.10
 -12  -6  -4   17.50   10.20
 -12  -6  -4    1.70    9.40
 -12   6   4    7.00   13.60
 -12  -6   4   19.20   11.40
 -12  -6   4   14.10    7.40
 -12   6  -4   22.10   13.60
 -12   6  -4    9.30   10.30
 -12   6   5   -1.50    7.40
  12  -6   5   19.50    8.70
 -12  -6  -5   14.10    7.10
 -12   6  -5   13.00    6.80
 -12  -6   5   13.90    7.60
 -12  -6   5    7.70    6.80
 -13   6   0  103.49   27.80
 -13  -6   0  100.99   27.80
  13   6   0  153.28   23.90
  13  -6   0  133.29   24.10
 -13  -6  -1   -8.90   13.10
  13  -6   1    6.60    6.80
  13   6  -1    1.30   10.50
 -13   6  -1    5.30   16.10
 -13  -6   1    4.10   12.70
 -13  -6   1    5.10   18.60
  13   6   1    3.20    6.60
  13  -6  -1    7.70    6.10
  13  -6   2   13.10    9.50
 -13  -6  -2   29.40   14.50
 -13  -6   2   54.29   12.70
 -13  -6   2   12.60   11.10
  13   6   2   23.70    9.00
 -13   6  -2   23.00   12.10
 -13  -6  -3    8.70    8.60
 -13  -6   3   25.60   10.70
 -13   6  -3    4.50   10.30
 -13  -6   3   -0.10   12.20
  13  -6   4   25.70    7.90
 -13  -6  -4   17.30    7.20
 -13   6   4   16.30    8.70
 -13  -6   4   13.20    7.70
 -13  -6   4   10.80    8.20
 -13   6  -4    4.10   12.40
 -14  -6   0    2.40    9.10
 -14   6   0    3.50   12.50
 -14  -6  -1    6.00    9.70
 -14  -6   1    1.80   20.20
 -14   6  -1    2.30   14.30
 -14  -6   1  -12.00   11.90
 -14  -6  -2   38.10   11.00
 -14  -6   2    5.40   10.80
 -14   6  -2   17.00   11.20
 -14  -6   2    9.60   12.00
 -14  -6  -3   19.30    8.20
 -14  -6   3   21.20   13.20
 -14   6  -3   11.00   12.90
 -14  -6   3    7.60    7.30
  14  -6   4   11.50    9.70
 -14  -6   4    8.30    7.60
 -14  -6   4    5.70    6.60
 -15  -6   0  -17.50    9.90
 -15  -6  -1   62.29   16.70
 -15  -6   1   74.79   14.70
 -15   6  -1   42.10   16.30
 -15  -6  -2    7.50   10.10
 -15  -6   2   -6.00    9.60
 -15   6  -2   11.30   11.60
   0  -7   0   -4.60    8.40
   0   7   1  177.18   28.40
   0  -7   1  161.38   28.00
   0   7  -1  122.19   27.80
   0  -7  -1  149.99   29.70
   0  -7  -2 2185.88  360.16
   0   7   2 2216.58  359.06
   0  -7   2 2027.80  358.06
   0   7  -2 2146.49  357.76
   0  -7  -3   12.00   12.20
   0   7  -3    2.60    6.60
   0   7   3   25.80   12.10
   0  -7  -4   33.20   10.90
   0   7  -4   16.90   11.70
   0   7   4   29.50   11.10
   0  -7  -4   29.60   10.70
   0   7   4   28.60   11.40
   0  -7  -5    2.70    9.80
   0   7  -5   43.70   13.30
   0   7   5    0.40   10.40
   0   7   5    4.10    9.30
   0  -7  -5    4.00   10.00
   0   7  -5   20.70    9.70
   0  -7  -5   17.50   10.60
   0   7  -5   19.30   11.20
   0   7  -6  348.27   60.69
   0  -7  -6  313.57   60.19
   0  -7  -6  326.17   60.19
   0   7  -6  323.37   59.89
   0   7   6  339.37   60.09
   0  -7  -6  344.97   60.49
   0   7  -6  449.95   71.19
   0   7   6  356.96   60.09
   0   7  -7  -19.30   10.10
   0   7   7    6.90    7.60
   0  -7  -7   14.80    9.10
   0   7  -7   10.50    7.30
   0  -7  -7    7.30   11.20
   0  -7  -7    9.10    8.10
   0  -7  -7   10.90    9.80
   0   7   7   11.10   11.20
   0   7  -8   52.69   13.50
   0   7   8   56.49   13.30
   0   7  -8   45.10   12.10
   0  -7  -8   53.79   14.10
   0  -7  -8   56.19   12.30
   0   7   8   50.29   12.20
   0  -7  -8   58.89   13.40
   1  -7   0 1002.20  164.08
   1   7   0  959.20  162.28
  -1  -7   0  949.80  163.48
  -1   7   1  203.98   32.50
   1   7  -1  162.88   32.80
   1   7  -1  177.28   32.10
   1  -7   1  199.98   34.20
  -1  -7  -1  194.68   35.20
   1  -7  -1  207.78   36.10
   1   7   1  223.28   34.80
  -1  -7   1  182.98   32.90
   1  -7  -1  164.28   32.30
  -1   7   2  347.07   57.59
  -1  -7  -2  345.97   59.79
   1   7  -2  349.17   56.19
   1  -7   2  351.46   57.59
   1   7   2  297.47   56.29
   1  -7  -2  314.07   56.39
   1  -7  -2  325.97   59.99
   1   7   2  340.77   58.99
   1   7  -3   33.40    8.80
   1  -7  -3   38.30   14.50
   1  -7  -3   31.50    9.40
   1   7   3   58.09   15.80
   1   7  -4  -13.30    7.40
   1   7  -4    6.60    9.80
  -1  -7  -4  -12.20    7.60
  -1   7   4  -13.90    8.30
  -1  -7  -4   -0.20   10.60
  -1   7   4   13.00   10.00
   1   7   4   -2.50   12.90
  -1   7  -4  -12.20    8.50
   1   7   4    0.50    8.50
   1  -7  -4   -0.10    8.40
   1  -7  -4   12.40    8.60
   1  -7  -4   -2.80   14.90
  -1   7  -4  -12.20    8.40
   1   7  -5  191.38   35.20
   1  -7   5  187.78   35.30
  -1   7   5  192.58   35.00
  -1  -7  -5  201.18   35.50
  -1  -7  -5  194.38   35.30
  -1   7   5  201.58   35.90
   1   7  -5  171.28   34.80
  -1  -7  -5  154.18   34.70
   1  -7  -5  200.28   35.20
  -1   7  -5  160.38   35.10
   1  -7  -5  219.98   35.80
   1   7   5  210.58   36.00
  -1   7  -5  197.18   35.40
   1   7   5  204.18   35.40
  -1   7  -5  145.99   34.80
   1   7  -6   89.19   20.00
  -1  -7  -6  110.79   21.40
  -1   7   6  100.59   21.40
  -1  -7  -6  117.79   21.20
   1   7  -6   97.59   21.00
  -1   7   6   95.39   20.70
  -1   7   6   77.89   19.90
  -1  -7  -6  109.39   21.10
   1  -7  -6   91.29   21.10
  -1   7  -6  112.89   21.30
   1   7   6   69.59   20.00
  -1   7  -6   73.29   20.90
   1  -7  -6   60.49   20.30
   1  -7  -6   81.99   21.30
  -1   7  -6  115.29   22.00
   1   7   6  108.39   21.50
  -1  -7  -7   23.40   12.60
   1   7  -7   23.20   11.30
   1   7  -7   28.20   12.90
  -1   7   7   37.50   12.50
  -1  -7  -7   49.40   11.40
  -1  -7  -7   22.40   10.60
  -1  -7  -7   51.89   13.70
  -1   7   7   39.60   11.30
   1  -7  -7    4.70   11.60
  -1   7  -7   25.50   10.70
   1   7   7   41.80   13.70
  -1   7  -7   53.59   11.20
   1  -7  -7   25.10   13.40
   1  -7  -7   39.30   10.80
  -1   7  -7   18.80   12.90
   1   7   7   28.80   10.40
  -1  -7  -8    9.30    8.70
  -1  -7  -8    4.10    6.10
  -1   7   8   11.40    6.30
   1   7  -8   21.00    9.40
  -1  -7  -8   -4.00    8.20
  -1   7   8    7.40    6.80
   1   7  -8   15.60    7.30
  -1  -7  -8   21.90    7.90
   1  -7  -8   13.90    6.70
   1  -7  -8   25.70    8.00
  -1   7  -8   15.30    6.90
   1   7   8   18.70    7.20
  -1   7  -8    5.60    5.80
   1   7   8    9.30    8.40
   1  -7  -8    7.10    5.50
  -1   7  -8    6.10    8.50
  -2  -7   0  634.84  107.99
   2  -7   0  648.84  108.99
   2   7   0  626.24  106.59
   2  -7   0  621.64  106.69
  -2   7   0  646.64  106.59
   2  -7   1  275.57   50.59
   2   7  -1  293.97   50.39
   2   7  -1  297.77   50.99
  -2  -7  -1  309.87   53.39
   2  -7   1  318.07   52.79
  -2   7  -1  288.37   52.39
   2  -7  -1  339.57   54.29
   2   7   1  283.37   50.49
   2  -7  -1  297.97   50.59
   2   7   1  341.27   53.39
   2  -7   2  196.28   35.60
   2  -7   2  184.68   32.60
   2   7  -2  202.68   32.80
   2  -7  -2  189.08   37.00
   2   7   2  153.38   36.10
   2  -7  -2  178.78   33.00
   2   7   2  190.28   33.00
   2   7  -3  104.89   17.30
   2  -7  -3   85.49   17.20
   2  -7  -3   84.69   22.40
   2   7   3   50.49   21.00
   2   7  -4  110.89   22.70
   2   7  -4   81.99   21.20
  -2  -7  -4  104.99   22.30
  -2  -7  -4   94.79   22.10
   2  -7   4  155.38   23.50
  -2   7   4  124.99   23.60
  -2   7   4  100.19   21.70
   2  -7  -4  119.29   23.60
   2   7   4   38.40   24.60
   2  -7  -4  127.69   23.10
  -2   7  -4  104.79   22.20
  -2   7  -4  140.89   23.10
   2   7   4  142.99   23.10
  -2   7  -4  118.89   24.10
   2  -7  -4  115.19   21.90
   2  -7   5   76.49   16.20
  -2  -7  -5   72.89   15.10
  -2   7   5   62.49   16.00
  -2   7   5   60.29   14.10
  -2  -7  -5   37.80   14.50
   2   7  -5   45.00   14.60
   2   7  -5   70.59   14.60
  -2  -7  -5   71.99   15.60
   2   7   5   61.19   16.10
   2  -7  -5   39.40   14.60
   2   7   5   52.99   14.70
  -2   7  -5   21.90   14.60
   2  -7  -5   52.59   15.50
  -2  -7   5   56.99   15.00
  -2   7  -5   48.00   15.20
  -2   7  -5   70.19   15.70
  -2   7   6   51.69   14.30
   2   7  -6   43.90   14.30
  -2   7   6   35.00   14.70
  -2  -7  -6   29.90   13.70
  -2   7   6   37.90   13.00
  -2  -7  -6   47.30   13.10
  -2  -7  -6   40.60   14.20
   2   7  -6   43.20   12.90
  -2  -7  -6   54.09   15.10
  -2   7  -6   52.29   15.40
   2  -7  -6   23.20   13.90
  -2   7  -6   41.20   13.80
   2   7   6   25.00   13.40
   2   7   6   56.09   14.40
   2  -7  -6   59.39   13.70
   2  -7  -6   20.50   14.10
  -2   7  -6   49.60   15.10
  -2  -7  -7    4.50    8.20
  -2   7   7   18.60    9.20
  -2  -7  -7    6.50    6.00
   2   7  -7   11.30   11.00
  -2   7   7   10.70    7.20
  -2  -7  -7    1.80   11.50
   2   7  -7   18.50    9.00
  -2  -7  -7   15.30   10.90
  -2   7  -7   12.10    7.80
  -2   7  -7    9.90   11.50
   2  -7  -7   11.30    8.90
   2  -7  -7   14.70   10.90
   2   7   7   14.20   11.10
  -2   7  -7    0.00    7.30
   2   7   7   -6.00   10.40
   2  -7  -7    3.30   11.20
   2   7  -8    9.40    9.80
  -2  -7  -8   19.10    9.80
  -2   7   8   32.30    9.00
  -2   7   8   25.70    8.90
  -2  -7  -8   15.30   10.50
   2  -7  -8   23.80    9.40
   2   7   8   32.60    8.50
   2  -7  -8   19.30    7.60
  -2   7  -8   24.10    8.10
   2  -7  -8   36.30   11.30
   2   7   8   37.20    9.70
  -2   7  -8   27.80    7.70
   3  -7   0  110.19   20.00
   3   7   0  105.49   19.90
   3  -7   0  160.18   25.00
   3  -7   1   46.10   11.40
   3  -7   1   72.49   15.80
   3   7  -1   55.79   10.90
   3   7  -1   51.59   12.70
   3   7   1   71.49   18.00
   3   7   1   61.19   11.30
  -3   7  -1   45.10   14.30
   3  -7  -1   63.69   11.50
   3  -7  -1   54.39   16.50
   3  -7   2   88.59   16.20
   3  -7   2   95.29   19.60
   3   7  -2   67.39   15.20
   3  -7  -2  100.09   21.90
   3   7   2   98.69   16.10
   3   7   2  110.09   21.40
   3  -7  -2   68.39   15.80
   3   7  -3  720.23  120.39
   3  -7  -3  641.94  123.89
   3  -7  -3  739.93  120.59
   3   7   3  706.73  124.29
   3  -7   4   39.30   11.60
  -3  -7  -4   21.50   10.80
  -3   7   4   27.90   11.80
  -3   7   4   16.60    8.70
  -3  -7  -4   14.40   10.10
   3   7  -4   17.30    9.60
   3   7  -4   31.30    9.00
  -3  -7   4   24.60   10.70
   3   7   4   36.80   10.40
   3  -7  -4   35.20   12.30
   3  -7  -4   38.10   10.50
  -3   7  -4   16.90   12.90
  -3   7  -4   13.80   10.10
  -3   7  -4   21.60   10.60
  -3   7   5  154.88   33.10
  -3  -7  -5  133.99   32.50
   3  -7   5  174.68   33.20
   3   7  -5  163.98   32.70
   3   7  -5  176.38   32.40
  -3  -7  -5  182.78   33.30
  -3   7   5  148.69   31.60
   3   7   5  207.68   33.80
   3  -7  -5  187.68   34.50
  -3   7  -5  181.08   33.40
   3  -7  -5  202.78   34.30
  -3  -7   5  200.88   33.50
  -3   7  -5  214.68   34.20
  -3   7  -5  181.88   33.30
   3   7   5  152.08   32.60
  -3   7   6   10.30   11.80
  -3   7   6   10.40   12.10
  -3  -7  -6   10.30   13.70
   3   7  -6    2.70   13.40
  -3  -7  -6   22.00   11.60
  -3  -7  -6   -0.30   11.40
  -3   7   6   -8.00    8.80
   3   7  -6   -8.20   10.60
  -3  -7  -6    2.80    8.30
   3   7   6    1.30   10.40
  -3   7  -6   -5.50    7.40
   3  -7  -6   -0.40   10.90
   3  -7  -6   -3.30   12.90
   3  -7  -6   13.20   11.10
  -3   7  -6    0.40    8.10
  -3   7  -6   10.40   11.70
   3   7   6   -0.10   10.20
   3   7  -7   64.99   14.50
  -3  -7  -7   61.39   14.50
  -3  -7  -7   50.69   10.60
  -3   7   7   27.80   14.20
  -3   7   7   42.20   14.80
  -3  -7  -7   17.40   13.40
  -3   7   7   29.50   11.90
  -3   7  -7   20.20   12.00
  -3   7  -7   80.99   14.80
   3   7   7   48.20   13.40
   3  -7  -7   65.09   12.50
   3   7   7   47.50   11.90
   3  -7  -7   36.40   14.30
  -3   7  -7   19.10   13.60
   3  -7  -7   39.50   14.40
  -3  -7  -8   19.00    7.60
   3   7  -8   19.90    9.10
  -3  -7  -8   14.40    6.90
  -3   7   8    2.00    6.40
  -3   7   8    3.10    6.50
   3  -7  -8    8.70    7.00
   3   7   8    8.80    7.50
   3  -7  -8   10.00    6.50
   3  -7  -8    8.20   12.10
  -3   7  -8    7.40    5.80
  -3   7  -8   29.00    9.10
   4  -7   0   12.60   11.30
   4   7   0   14.20   13.20
   4   7   0   13.70    4.70
   4  -7   0    6.30    4.90
   4  -7   1  197.98   37.20
   4  -7   1  176.78   33.30
   4   7  -1  196.78   33.00
   4   7   1  189.58   33.00
   4  -7  -1  211.38   37.60
   4   7   1  183.28   37.70
   4  -7  -1  193.28   33.20
   4  -7   2  146.49   22.60
   4   7  -2  127.69   21.90
   4  -7   2  134.59   26.40
   4   7   2  116.79   22.30
   4   7   2  113.99   27.20
   4  -7  -2  104.09   22.10
   4  -7  -2  111.29   27.10
   4   7  -3    0.70    5.60
   4  -7   3   12.40    7.30
   4  -7   3    3.00   10.30
   4  -7  -3   -3.20    6.60
   4  -7  -3   10.10   13.30
   4   7   3    7.10    7.30
   4   7   3  -15.40   14.50
  -4   7   4   28.40    9.40
   4   7  -4    4.30    7.40
   4   7  -4   20.60   11.20
  -4  -7  -4   18.90   10.70
  -4  -7  -4    8.90    9.10
  -4   7   4   29.40   11.30
   4   7   4   21.50    8.70
   4  -7  -4   14.40    8.90
  -4  -7   4    1.40    4.50
  -4  -7   4   12.10    8.30
  -4  -7   4    6.80    9.80
  -4   7  -4   15.70   12.90
  -4   7  -4   14.90    9.50
  -4   7  -4   13.30   10.20
  -4   7  -4   21.70   12.10
   4  -7  -4    4.30    8.80
  -4  -7  -5   30.90   12.60
   4   7  -5   20.10   12.10
  -4   7   5   23.50   13.00
  -4   7   5   37.90   14.80
   4   7  -5   55.79   13.10
  -4   7   5   37.10   10.80
   4  -7   5   30.90   15.00
  -4   7  -5   25.20   14.80
   4   7   5   30.90   12.20
  -4   7  -5   55.19   14.20
   4  -7  -5   30.20   12.20
   4  -7  -5   24.30   13.00
   4  -7  -5   33.50   12.80
  -4   7  -5   42.30   13.40
  -4  -7  -6   -4.60   10.80
   4   7  -6    2.00   11.40
  -4   7   6    8.50   12.30
  -4   7   6   -6.80    8.60
   4  -7   6   -0.10   10.60
  -4   7   6    9.70   12.60
   4  -7  -6    6.30   11.80
   4  -7  -6   10.60   13.40
   4   7   6    6.70   15.00
   4  -7  -6   -2.80   10.80
  -4   7  -6  -14.50    9.50
   4   7   6    3.10   10.50
  -4   7  -6   15.50   12.60
  -4   7   7   11.10    6.40
  -4  -7  -7    0.00    7.40
  -4   7   7   -3.70    7.60
   4   7  -7    7.00    7.90
  -4   7   7   23.10   13.10
  -4  -7  -7   -7.20   10.40
   4  -7  -7   -2.20    6.90
   4   7   7   -9.90    9.50
   4   7   7   -4.80    5.90
  -4   7  -7    8.40   11.20
  -4   7  -7  -10.80    6.00
   4  -7  -7    4.40    8.40
   4  -7  -7   14.10    8.20
   4   7  -8    4.10    8.40
  -4   7   8    3.70    8.60
  -4  -7  -8    0.10    8.60
  -4  -7  -8   10.80    6.20
   4  -7  -8   11.60    9.00
  -4   7  -8    6.10    7.00
   4  -7  -8   14.60    6.10
  -4   7  -8    6.40    8.10
   5  -7   0   23.70   13.10
   5  -7   0   32.60    7.00
   5   7   0   28.40   13.80
   5   7   0   24.40    6.40
   5  -7   1  492.65   90.79
   5   7  -1  495.45   86.99
   5  -7   1  530.35   87.39
   5  -7  -1  517.15   87.19
   5   7   1  529.45   87.29
   5  -7  -1  528.65   91.29
   5   7   1  536.45   91.49
   5   7  -2   86.59   14.60
   5  -7   2   69.19   15.30
   5  -7   2  110.89   21.40
   5  -7  -2   73.79   15.40
   5   7   2   70.79   15.30
   5   7   2   91.09   23.80
   5  -7  -2   73.99   20.70
  -5  -7  -3  145.19   23.70
   5   7  -3  108.19   22.10
   5  -7   3  106.49   27.00
   5  -7   3  104.69   22.20
  -5   7  -3  165.38   26.60
   5   7   3  152.38   23.60
  -5  -7   3  126.49   25.10
   5   7   3  154.98   24.90
   5  -7  -3   93.69   28.20
  -5   7  -3  132.49   24.50
  -5  -7   3  115.49   21.00
   5  -7  -3  111.99   22.60
  -5   7  -3  115.89   23.40
  -5   7   4    3.80   11.30
  -5  -7  -4   58.59   12.70
  -5   7   4    9.10    7.90
   5   7  -4   40.40   10.50
  -5  -7  -4   22.50    9.30
  -5   7   4   35.40   12.50
   5   7  -4   28.00    9.10
   5  -7  -4   18.40    9.90
  -5   7  -4   30.70   10.10
   5  -7  -4   18.30   11.50
  -5  -7   4   16.20   10.10
  -5  -7   4   20.90    6.00
  -5   7  -4   26.30   11.70
  -5   7  -4   26.10   12.90
   5   7   4   22.50    9.60
  -5   7  -4   37.70   11.10
   5   7   4   18.80    9.00
   5   7  -5   74.49   18.00
  -5   7   5   92.99   17.80
  -5   7   5   63.49   19.00
   5   7  -5   73.89   17.30
   5  -7   5   75.49   18.70
  -5  -7  -5   72.19   18.00
  -5   7   5   85.89   19.40
  -5   7  -5   53.49   18.10
   5  -7  -5   90.99   18.60
  -5   7  -5   99.89   18.80
   5  -7  -5   46.40   17.60
   5  -7  -5   92.09   18.80
   5   7   5   64.09   17.40
  -5   7  -5  103.89   19.70
  -5  -7  -6  193.08   33.40
  -5   7   6  163.98   34.70
  -5  -7  -6  127.79   32.80
  -5   7   6  179.98   35.20
  -5   7   6  156.68   32.30
   5  -7   6  198.98   34.00
   5   7  -6  174.38   34.00
   5  -7  -6  216.78   34.80
  -5   7  -6  209.28   35.00
   5  -7  -6  209.68   34.90
  -5   7  -6  193.98   35.00
   5   7   6  152.88   33.70
  -5   7   7   18.30    9.20
  -5  -7  -7   14.40    8.70
  -5  -7  -7    9.40    7.60
   5   7  -7    4.00    9.90
  -5   7   7   20.20    8.20
  -5   7   7   -0.40   11.90
   5  -7  -7   28.90    9.80
   5  -7  -7   30.50   11.60
   5  -7  -7    2.40    9.70
  -5   7  -7   24.60    8.70
  -5   7  -7   18.50    8.90
   6  -7   0  203.98   35.30
   6   7   0  196.58   34.90
   6   7   0  237.18   42.90
   6  -7   0  242.98   41.80
   6  -7   1   72.39   14.10
   6   7  -1   65.69   13.20
   6  -7   1   70.09   19.90
   6   7   1   91.39   21.40
   6   7   1   83.79   14.00
   6  -7  -1   69.29   13.50
   6  -7  -1   69.59   20.00
   6  -7   2   89.09   19.90
   6   7  -2   97.79   19.40
   6  -7   2   97.59   25.40
   6   7   2   85.49   19.90
   6  -7  -2   37.40   23.50
   6  -7  -2  104.19   20.00
  -6  -7   2  130.59   19.60
   6   7   2   91.69   25.90
  -6  -7  -3  156.18   26.50
  -6   7   3  142.59   27.20
  -6   7   3  128.99   24.80
  -6  -7  -3  191.38   28.20
   6   7  -3  122.29   24.20
  -6  -7  -3  122.59   25.60
  -6   7   3  151.48   28.50
   6  -7   3  141.09   25.30
  -6   7   3  137.59   23.00
  -6   7  -3  188.58   30.60
  -6   7  -3  128.59   26.60
  -6   7  -3  117.39   26.10
  -6   7  -3  159.88   27.20
  -6  -7   3  126.39   23.20
   6   7   3  120.09   25.60
   6  -7  -3  136.39   25.00
   6   7   3  130.79   25.20
  -6  -7   3  138.29   26.70
  -6   7   4   32.00   13.70
  -6  -7  -4   42.20   11.20
   6  -7   4   15.10    9.00
  -6  -7  -4   30.30   11.50
   6   7  -4   20.90    9.10
  -6   7   4   14.00    7.80
  -6   7   4   14.90   12.80
   6   7   4   37.00   10.50
  -6   7  -4   27.20   13.10
   6  -7  -4   29.60   10.60
  -6   7  -4   16.90   15.60
  -6   7  -4   14.20   12.20
   6   7   4   17.90   10.80
   6  -7  -4   40.50   12.70
  -6   7  -4   24.90   11.80
  -6  -7   4   29.70   11.50
   6   7  -5   66.29   17.00
  -6  -7  -5   78.29   17.60
  -6  -7  -5   96.99   17.10
  -6   7   5   87.19   19.90
  -6   7   5   91.19   16.50
  -6   7   5   67.99   18.90
   6   7  -5  100.39   16.20
  -6   7   5   63.49   12.20
   6  -7   5   82.19   16.50
  -6   7  -5   99.59   22.80
   6  -7  -5   69.79   17.90
   6   7   5   71.79   17.10
   6  -7  -5   97.19   18.10
   6  -7  -5   74.99   17.40
  -6   7  -5  102.79   19.20
  -6  -7  -6   68.49   16.10
   6  -7   6   56.39   14.80
   6   7  -6   10.20   13.30
  -6   7   6   60.79   16.90
   6   7  -6   60.89   13.30
  -6   7   6   31.20   16.20
  -6   7  -6   58.79   16.50
   6  -7  -6   66.09   15.20
   6  -7  -6   36.80   14.70
  -6   7  -6   61.29   15.60
  -6  -7  -7   10.60   11.10
  -6  -7  -7   14.00    9.80
   6   7  -7   24.80    9.50
  -6   7   7    7.60   11.20
  -6   7   7    3.00   11.40
   6  -7  -7   17.20   11.20
   6  -7  -7   15.60    9.90
   6  -7  -7   27.50    9.90
  -6   7  -7   26.10    8.80
  -6   7  -7   21.30    8.10
   7  -7   0  527.25   84.59
   7  -7   0  435.16   89.29
   7   7   0  495.35   84.29
   7   7   0  486.95   89.89
  -7  -7  -1  242.38   47.10
   7   7  -1  253.57   45.20
  -7  -7  -1  244.88   46.90
  -7  -7  -1  376.76   51.39
   7  -7   1  263.77   45.80
  -7  -7   1  251.07   47.20
  -7   7  -1  240.48   47.50
   7  -7  -1  295.37   45.60
   7  -7  -1  226.38   50.99
   7   7   1  291.27   45.70
   7  -7   2  227.28   36.90
  -7   7   2  263.77   39.10
  -7  -7  -2  222.08   38.20
  -7   7   2  164.08   35.30
  -7  -7  -2  223.78   38.00
  -7  -7  -2  211.38   39.70
   7   7  -2  218.78   36.10
   7   7   2  258.17   37.00
   7  -7  -2  227.98   36.80
  -7  -7   2  204.48   38.20
  -7   7  -2  252.37   39.50
  -7  -7   2  240.08   38.60
  -7   7  -2  202.98   37.30
  -7   7  -2  283.27   40.40
  -7  -7   2  239.08   38.90
  -7   7  -2  234.18   39.00
  -7  -7  -3   25.40   10.10
  -7   7   3   19.20   12.40
   7   7  -3   26.30    7.10
   7  -7   3    7.00    7.10
  -7  -7  -3   25.80   11.80
  -7  -7  -3   33.70   11.10
   7  -7  -3   18.70    8.60
   7   7   3   10.50    9.10
  -7   7  -3   10.00   13.50
  -7  -7   3   18.00   10.60
  -7   7  -3   44.40   12.90
   7   7   3   27.20    9.30
  -7   7  -3   33.60   11.20
  -7   7  -3   15.50   11.50
  -7  -7  -4   45.10   12.50
   7  -7   4   73.99   13.30
   7   7  -4   52.29   11.00
  -7   7   4   43.80   14.70
  -7   7   4   56.29   15.50
  -7  -7  -4   22.70   11.50
   7   7   4   38.80   13.00
  -7  -7   4   30.10    8.20
  -7   7  -4   44.80   15.20
  -7   7  -4   71.09   15.20
   7   7   4   39.40   12.00
   7  -7  -4   39.00   10.90
  -7  -7   4   41.80   13.80
  -7   7  -4   38.50   14.20
  -7   7  -4   37.80   12.50
  -7   7   5   75.99   17.90
  -7   7   5   48.30   13.90
  -7  -7  -5   30.40   14.80
   7  -7   5   47.30   14.90
   7   7  -5   33.30   13.00
  -7  -7  -5   48.50   13.90
   7  -7  -5   45.80   14.20
  -7   7  -5   29.40   13.50
   7   7   5   59.59   25.60
  -7   7  -5   48.00   14.80
  -7  -7   5   71.49   16.10
   7  -7  -5   51.89   15.60
   7  -7  -5   49.00   12.80
  -7   7  -5   47.70   14.90
  -7   7   6   42.50   16.30
  -7  -7  -6   65.99   15.20
  -7  -7  -6   90.39   17.10
  -7   7   6   22.10   16.30
   7   7  -6   49.00   14.60
   7   7  -6   91.89   17.70
   7  -7   6   61.39   14.80
  -7   7  -6   60.79   15.60
  -7   7  -6   16.60   14.10
   7  -7  -6   45.80   14.60
  -7   7  -6  111.79   17.50
   7  -7  -6   72.79   15.10
  -7  -7  -7   15.70    8.40
   7   7  -7   19.40    8.90
  -7   7   7   11.20    8.00
  -7   7   7   12.20   10.40
  -7  -7  -7   16.70    8.10
   7  -7  -7    9.20   10.40
  -7   7  -7   -1.00    8.10
   7  -7  -7   -0.20    8.00
  -7   7  -7   10.70    6.70
   8  -7   0  283.87   42.70
  -8  -7   0  207.68   44.10
  -8  -7   0  237.98   44.30
  -8   7   0  252.47   41.70
  -8   7   0  243.48   45.70
   8   7   0  243.48   42.20
  -8  -7   0  238.48   44.20
  -8  -7   0  232.88   44.60
   8  -7   1   83.99   14.90
  -8  -7  -1   76.19   19.20
  -8  -7  -1   83.99   21.60
   8   7  -1   69.19   14.10
  -8  -7  -1   74.19   16.90
  -8  -7   1   88.59   18.40
  -8   7  -1   82.59   19.80
   8   7   1   70.99   14.40
  -8   7  -1   86.89   18.30
   8  -7  -1   72.59   14.50
  -8  -7   1   73.99   17.30
  -8  -7   1   94.39   19.30
   8   7  -2  328.27   56.69
  -8  -7  -2  350.16   59.19
  -8  -7  -2  304.17   58.69
  -8   7   2  336.87   59.29
   8  -7   2  320.47   57.39
  -8  -7  -2  347.87   62.19
  -8   7  -2  341.37   59.69
  -8  -7   2  322.97   58.29
  -8  -7   2  310.57   58.39
   8   7   2  345.97   57.49
   8  -7  -2  375.86   57.39
  -8  -7   2  308.87   58.99
  -8   7  -2  350.86   59.59
  -8   7  -2  337.57   57.89
  -8  -7  -3    8.20    9.40
  -8  -7  -3   25.90   11.20
  -8   7   3    4.70   12.70
   8   7  -3    5.80    6.50
  -8  -7  -3    1.20    9.90
   8  -7   3   15.20    8.60
  -8   7  -3   17.70   13.20
   8  -7  -3    8.10    7.70
   8   7   3   14.40   10.80
  -8  -7   3   13.30   10.70
  -8   7  -3    9.90   14.30
  -8  -7   3    4.70    4.70
   8   7   3    9.90    8.40
  -8   7  -3    0.60   10.50
   8  -7   4  176.48   26.20
  -8  -7  -4  140.29   25.40
  -8  -7  -4  153.48   26.40
  -8   7   4  123.99   28.50
  -8   7   4   83.39   26.80
   8   7  -4  134.59   24.40
  -8   7  -4   93.59   26.10
  -8   7  -4  113.19   25.20
   8  -7  -4  141.19   24.60
  -8   7  -4   94.69   27.00
   8   7   4  139.59   25.80
  -8   7  -4  133.29   26.80
  -8  -7   4  146.09   27.30
   8  -7   5   21.60   12.90
  -8  -7  -5   41.80   14.20
  -8   7   5   41.60   15.10
  -8  -7  -5   22.00   11.30
   8   7  -5   44.90   12.30
  -8   7   5   33.20   16.20
  -8  -7   5   39.60   12.00
  -8   7  -5   50.59   14.90
  -8   7  -5   47.40   14.40
   8  -7  -5   24.50   13.40
   8  -7  -5   41.80   12.00
  -8   7  -5   46.40   13.70
  -8   7   6   34.80   11.00
  -8   7   6   23.60   10.60
   8  -7   6    3.70   10.10
  -8  -7  -6   28.50   13.00
  -8  -7  -6   18.40   10.00
  -8  -7   6   32.40   10.40
   8  -7  -6   32.70   11.00
  -8   7  -6   25.40   12.10
  -8   7  -6   13.10   11.20
   8  -7  -6   31.20    9.00
  -8   7  -6   26.80    9.60
  -8   7   7    5.80    9.40
  -8   7   7   16.00    7.10
  -8  -7  -7   14.90    9.40
  -8  -7  -7   14.40    7.00
   8  -7  -7   17.00    7.00
   8  -7  -7   21.50    7.50
  -8   7  -7    7.60    7.70
  -8   7  -7   -1.30    7.40
  -9  -7   0   93.19   21.00
  -9  -7   0   68.39   20.20
  -9   7   0   80.29   21.40
   9  -7   0   87.79   16.80
   9   7   0   99.89   16.60
  -9  -7   0   93.59   19.30
  -9  -7  -1   51.99   16.00
  -9  -7  -1   47.70   21.30
  -9  -7  -1   45.10   14.80
  -9   7   1   60.19   10.60
   9   7  -1   59.09   11.30
   9  -7   1   58.59   12.20
  -9   7  -1   68.99   17.60
  -9  -7   1   45.70   16.20
  -9  -7   1   74.99   17.30
   9   7   1   49.70   11.90
  -9  -7   1   74.89   15.70
  -9   7  -1   59.69   18.00
   9  -7  -1   50.69   11.90
  -9  -7  -2  132.99   25.70
   9   7  -2  132.09   22.60
   9  -7   2  120.09   23.20
  -9  -7  -2  147.49   27.30
  -9   7   2  118.99   26.30
   9  -7  -2   98.09   22.80
  -9  -7   2   50.29   29.10
  -9   7  -2  118.89   27.90
  -9  -7   2  146.99   26.20
   9   7   2  134.69   23.70
  -9   7  -2  132.49   26.20
  -9  -7   2  147.89   26.60
  -9  -7  -3   -1.50    8.40
   9   7  -3    3.40    6.40
  -9   7   3  -13.40   13.80
  -9   7   3   -4.70    3.40
   9  -7   3    1.90    6.80
  -9  -7  -3    4.50   10.50
  -9  -7   3   19.80    9.10
  -9   7  -3   -3.00    6.80
  -9   7  -3    4.60   11.50
   9   7   3    4.00    8.10
  -9  -7   3   -0.80    5.50
   9  -7  -3   -8.90    6.90
  -9   7  -3   -5.50   13.50
   9   7  -4   65.69   18.10
  -9  -7  -4   94.19   19.30
  -9   7   4   92.09   23.20
  -9  -7  -4   75.89   21.10
   9  -7   4   98.39   20.30
  -9  -7  -4  112.99   21.50
  -9   7  -4   88.59   20.50
  -9   7  -4   60.59   21.70
  -9  -7   4  100.19   20.30
  -9   7  -4  138.89   21.70
   9  -7  -4  101.89   18.80
  -9   7  -4  102.29   23.40
   9  -7   5   31.40   13.10
  -9   7   5   48.60   15.40
  -9  -7  -5   53.39   15.00
  -9   7   5   12.20   16.10
  -9  -7  -5   51.99   11.50
   9   7  -5   57.69   13.20
  -9   7  -5   33.70   14.00
  -9   7  -5   39.10   12.30
  -9  -7   5   34.20   15.30
   9  -7  -5   53.99   14.00
   9  -7  -5   27.20   10.80
   9  -7   6   28.30   10.30
  -9  -7  -6   37.00   10.20
  -9   7   6   -1.00   12.00
  -9  -7  -6   26.00    9.60
  -9   7   6   26.20    9.20
  -9   7  -6   33.90    9.60
  -9  -7   6   21.40    9.20
  -9   7  -6   19.30   10.70
 -10  -7   0   17.20   12.20
  10   7   0   17.90    6.00
  10  -7   0    8.90    7.00
 -10   7   0    3.50   12.70
 -10  -7   0   32.10   16.70
 -10  -7   0   21.80   10.30
 -10  -7  -1   81.09   20.80
 -10  -7  -1   92.09   28.30
 -10  -7  -1  104.69   23.40
  10  -7   1   92.69   18.40
  10   7  -1   99.29   17.60
 -10  -7   1  105.99   22.90
 -10   7  -1   98.59   24.20
 -10   7  -1   93.79   22.10
 -10  -7   1   91.39   21.50
  10  -7  -1   96.79   18.30
  10   7   1   98.49   18.30
 -10  -7  -2   53.09   15.50
  10   7  -2   50.49    9.20
 -10   7   2   52.29   16.70
  10  -7   2   22.90    9.50
 -10   7  -2   29.40   14.10
 -10  -7   2   41.40   14.10
  10   7   2   34.10   10.60
  10  -7  -2   44.70   10.40
 -10   7  -2   31.80   17.30
 -10  -7   2   22.00   14.20
 -10   7   3   -2.60   10.50
 -10  -7  -3   14.30   12.10
  10   7  -3    4.90    6.80
  10  -7   3    0.80    7.10
 -10   7  -3    9.50   15.60
 -10   7  -3   16.10   12.30
 -10  -7   3   -4.30    8.40
  10   7   3   15.80    9.20
 -10  -7   3   10.40    6.80
  10  -7  -3   13.10    7.70
 -10   7   4   -6.90   14.90
 -10  -7  -4    5.10   10.00
  10  -7   4  -10.50    7.90
  10   7  -4    1.00    7.30
 -10  -7  -4   -0.40    9.70
 -10  -7   4    0.50    8.40
 -10  -7   4   10.10    8.40
 -10   7  -4   -1.20   10.50
  10  -7  -4   -2.10    6.20
 -10   7  -4   -0.60    9.50
  10   7   4    8.70    8.30
  10  -7   5    5.90    7.00
 -10  -7  -5    6.40   11.40
 -10   7   5   -6.70    9.40
 -10  -7   5   -2.70    7.70
 -10  -7   5    5.80    7.20
  10  -7  -5   -8.00    9.20
 -10   7  -5   10.60   10.60
 -10  -7  -6    6.00    6.80
  10  -7   6   -6.30    7.20
 -10   7   6   12.80   10.50
 -10  -7   6    6.80    7.40
 -10   7  -6   -9.50    7.40
 -10  -7   6   -6.90    7.00
  10  -7  -6    0.60    6.60
 -11  -7   0   85.09   26.10
  11  -7   0   89.49   17.10
 -11  -7   0   81.19   21.60
  11   7   0   94.49   16.50
 -11   7   0   65.39   21.40
 -11  -7  -1   77.69   21.10
  11  -7   1  106.79   17.00
 -11  -7  -1  100.49   30.60
  11   7  -1   79.09   15.20
 -11   7  -1   72.29   21.70
 -11  -7   1   66.09   20.10
 -11  -7   1   94.79   22.10
  11  -7  -1   74.69   15.70
  11   7   1   72.69   15.60
  11  -7   2   85.09   19.70
 -11  -7  -2   79.09   23.10
  11   7  -2  106.49   18.70
 -11  -7   2  147.69   24.50
 -11   7  -2  108.19   23.50
  11  -7  -2   81.49   18.70
 -11   7  -2   79.19   25.10
 -11  -7   2  109.99   22.00
  11   7   2  108.09   19.50
 -11   7   3   16.80   15.00
  11   7  -3   19.90    7.00
  11  -7   3   35.90   10.70
 -11  -7  -3   19.40   12.80
  11  -7  -3   24.70    7.70
 -11  -7   3   -1.90   13.00
  11   7   3   13.90    8.20
 -11   7  -3   36.40   16.90
 -11   7  -3   15.60   12.90
 -11  -7   3   11.50    9.00
  11   7  -4   22.90    8.20
 -11   7   4   24.40   15.90
 -11  -7  -4   16.30   10.90
 -11  -7  -4   20.20   10.30
 -11   7  -4   20.40   10.90
  11  -7  -4    8.50    7.00
  11   7   4   19.30   10.10
 -11   7  -4   32.40   10.00
 -11  -7   4    8.50    7.50
 -11  -7   4   26.30   12.90
 -11  -7  -5   16.40   10.20
  11  -7   5   -9.40    8.60
 -11   7   5   -5.70   12.10
 -11   7  -5   -2.50    6.50
 -11  -7   5    8.60   10.90
 -11  -7   5   18.70   10.60
 -11   7   6   37.50   10.00
  11  -7  -6   35.20    9.20
 -12   7   0   27.70   18.70
 -12  -7   0   53.99   18.80
 -12  -7   0   61.49   27.80
  12   7   0   74.89   13.60
  12  -7   0   81.09   14.10
 -12  -7  -1  108.69   30.20
  12  -7   1  157.48   27.30
  12   7  -1  143.19   26.30
 -12   7  -1  140.49   32.10
 -12  -7   1  165.18   30.40
  12  -7  -1  151.08   26.80
  12   7   1  145.19   26.70
 -12  -7   1  151.88   30.20
  12   7  -2   28.50    7.70
  12  -7   2   49.00   11.00
 -12  -7  -2   52.39   16.20
 -12  -7   2   18.20   14.90
  12  -7  -2   30.30    8.50
 -12   7  -2   24.30   16.70
 -12  -7   2   13.40    8.70
  12   7   2   41.00    9.70
 -12  -7   2   17.90   13.00
 -12   7   3   51.39   14.10
 -12  -7  -3   68.19   17.10
  12  -7   3   61.19   13.50
  12   7  -3   52.19   11.50
 -12   7  -3   42.90   15.60
 -12  -7   3   39.20   16.30
  12  -7  -3   41.60   12.10
 -12   7  -3   64.49   16.80
  12   7   3   60.39   13.90
 -12  -7  -4    9.80    7.00
 -12   7   4   13.00   10.10
 -12   7  -4   -0.60   10.40
 -12  -7   4   -1.20   11.10
 -12   7  -4    6.00   13.70
 -12  -7   4   35.20   11.70
 -12   7   5   19.10   11.70
  12  -7   5    7.20    8.00
 -12  -7   5   19.80   10.40
 -12   7  -5   23.70    7.30
 -12  -7   5   11.10    7.20
  13   7   0   89.09   15.80
 -13   7   0   89.99   21.40
 -13  -7   0   38.70   20.10
  13  -7   0   80.29   16.10
 -13  -7   0  116.19   29.10
 -13  -7  -1   10.00   13.60
  13  -7   1   10.50    7.90
  13   7  -1   26.00    6.90
 -13  -7   1    0.40   12.60
 -13   7  -1  -11.50   14.20
  13   7   1   15.30    7.60
  13  -7  -1    8.00    6.10
 -13  -7   1   37.50   21.80
 -13  -7  -2   25.50   14.10
 -13  -7   2   50.19   13.20
 -13  -7   2   18.10    9.20
 -13   7  -2    9.10   15.90
 -13  -7  -3   14.50   11.10
 -13   7  -3   20.50   11.30
 -13  -7   3    4.90   12.20
 -13  -7   3   11.80   11.60
 -13   7   4    9.20    7.00
  13  -7   4    6.40    6.80
 -13  -7  -4   12.30    8.30
 -13  -7   4   17.60   10.60
 -13   7  -4   20.60    9.00
 -13  -7   4    6.40    8.00
 -14   7   0    3.80   15.40
 -14  -7   0   -9.40    7.90
 -14  -7  -1   18.90   14.80
 -14   7  -1   58.89   14.10
 -14  -7   1   42.30   14.80
 -14  -7   1   60.09   17.90
 -14  -7  -2   -5.60   10.90
 -14   7  -2    2.90   10.10
 -14  -7   2    5.70   13.00
 -14  -7   2   -4.50    7.70
 -14  -7  -3    2.00    8.60
  14  -7   3    1.50    7.40
 -14   7  -3   -6.00    8.30
 -14  -7   3    7.60    9.80
 -14  -7   3   19.60   14.10
 -15  -7   0   12.80    8.30
 -15  -7  -1    9.10    7.70
 -15  -7   1    2.10    6.50
 -15   7  -1    8.50    8.10
 -15  -7  -2    4.50    7.00
 -15   7  -2    0.60   10.70
 -15  -7   2   -2.00   19.90
   0  -8   0  131.79   26.40
   0  -8  -1  373.16   65.79
   0  -8   1  383.16   64.39
   0   8   1  357.56   63.89
   0  -8  -2   35.30   12.30
   0  -8   2   41.00    9.80
   0   8  -2   36.00    9.70
   0   8   2   47.30   12.20
   0  -8  -3   16.50   12.80
   0  -8  -4    5.30    9.00
   0  -8  -4   -2.40    8.30
   0   8   4   -1.50    9.00
   0  -8   4   18.80   12.30
   0   8   4   -6.90    7.40
   0   8  -4    7.00    9.00
   0   8  -4   10.30    8.80
   0   8  -5  361.56   56.59
   0  -8  -5  313.77   55.49
   0  -8   5  229.28   59.89
   0  -8  -5  339.17   55.49
   0   8  -5  302.97   54.69
   0   8   5  294.67   55.19
   0   8   5  288.17   54.89
   0   8  -5  338.77   55.69
   0  -8  -5  308.67   55.19
   0   8  -6   89.99   20.60
   0  -8  -6  106.79   21.30
   0   8  -6   87.29   19.60
   0  -8  -6   67.89   19.40
   0   8   6  100.09   20.90
   0  -8  -6  132.39   21.60
   0   8   6   51.69   19.20
   0   8  -6  128.89   27.10
   0   8   7  125.49   30.60
   0  -8  -7  157.78   31.30
   0   8  -7  183.08   30.70
   0   8   7  188.18   30.40
   0  -8  -7  145.89   30.90
   0   8  -7  165.38   30.50
   0   8  -8    8.80    8.10
   0  -8  -8    2.40    5.20
   0   8  -8    0.00    6.30
   0  -8  -8   -3.90    8.50
   0   8   8   -3.20    8.30
   0   8   8   -0.30    5.70
   0  -8  -8   13.70    6.30
  -1  -8   0  698.73  109.79
   1  -8   0  679.13  110.09
   1   8   0  633.94  107.79
  -1   8   0  590.24  108.39
   1   8  -1   58.69   11.60
   1  -8   1   55.29   13.90
  -1   8   1   52.19   11.80
   1   8  -1   50.89   12.60
  -1  -8  -1   64.49   15.70
   1  -8  -1   62.89   16.30
   1  -8  -1   64.09   12.20
   1   8   1   62.09   14.90
  -1  -8   1   48.50   12.50
   1   8   1   53.19   11.50
  -1   8   2  384.26   61.39
  -1  -8  -2  351.86   63.89
   1  -8   2  344.87   61.49
   1   8  -2  360.96   60.29
   1   8   2  339.97   62.69
   1  -8  -2  379.16   64.29
   1   8   2  349.37   60.39
   1  -8  -2  331.17   60.29
   1   8  -3   82.89   15.10
   1  -8  -3   71.59   20.50
   1  -8  -3   75.19   14.90
   1   8   3   42.70   17.20
   1   8  -4   44.50   12.10
   1  -8   4   39.60   12.70
  -1  -8  -4   35.20   11.90
  -1  -8  -4   38.10   11.80
  -1   8   4   45.60   13.20
  -1   8   4   51.39   11.20
   1   8   4   36.00   11.10
   1  -8  -4   44.00   12.10
  -1   8  -4   17.30   11.50
  -1   8  -4   31.00   11.00
   1   8   4   34.10   12.30
   1  -8  -4   55.49   12.30
  -1   8  -4   19.20   13.00
  -1  -8   4   34.20   14.10
  -1  -8  -5  116.09   21.80
   1  -8   5   98.69   22.80
  -1  -8  -5   82.99   20.60
  -1   8   5   70.89   21.10
   1   8  -5   97.29   20.20
  -1  -8  -5  116.19   22.10
  -1   8   5   82.19   20.30
   1   8  -5  124.19   23.00
   1   8   5  113.99   21.40
   1   8   5   81.59   21.30
   1  -8  -5  101.49   21.40
  -1   8  -5   79.19   21.00
   1  -8  -5  124.59   22.70
  -1   8  -5  113.29   22.40
  -1   8  -5   99.69   21.70
   1  -8  -5   94.69   21.10
  -1   8   6  152.48   26.60
  -1  -8  -6  165.58   27.30
   1   8  -6  186.48   28.00
  -1  -8  -6  119.79   26.30
  -1  -8  -6   93.69   25.00
   1   8  -6  133.09   25.40
  -1   8   6  105.09   26.30
   1  -8  -6  147.19   27.10
  -1   8  -6  132.59   26.40
   1   8   6   94.69   25.80
   1  -8  -6  122.69   26.60
  -1   8  -6  135.09   26.20
   1  -8  -6  124.09   26.50
  -1   8  -6  149.79   27.60
   1   8   6  147.39   26.30
  -1  -8  -7   25.30    9.40
  -1   8   7   34.30   12.60
  -1  -8  -7   17.70    7.20
  -1  -8  -7   12.50   12.20
   1   8  -7    5.00   11.30
   1   8  -7   12.10    9.20
  -1   8   7   34.00   11.40
  -1  -8  -7   22.80   11.50
  -1   8  -7   23.80   10.40
  -1   8  -7   25.50    9.40
   1   8   7   21.20    8.70
  -1   8  -7   -1.50   11.20
   1  -8  -7   16.90    9.50
   1  -8  -7   -1.90   11.20
   1  -8  -7   13.30    7.70
   1   8   7   12.80   11.10
  -1   8   8    4.50    7.50
  -1  -8  -8   20.10    8.80
  -1  -8  -8    5.40   10.10
  -1  -8  -8   10.20    6.30
   1   8  -8    6.70    8.20
  -1   8   8   16.80    9.70
  -1  -8  -8    6.70    9.00
   1  -8  -8    5.00    9.10
  -1   8  -8   -9.40    6.50
  -1   8  -8    4.30    7.10
   1   8   8    5.30    5.70
   1  -8  -8  -10.90    7.90
   1   8   8   -3.40    8.00
   1  -8  -8   11.70    6.20
  -2  -8   0  122.29   25.30
  -2   8   0  131.29   22.60
   2   8   0  118.39   22.70
   2  -8   0  130.49   22.90
   2  -8   0  129.49   26.40
   2  -8   1   79.09   15.90
   2  -8   1   77.09   18.50
  -2  -8  -1   86.79   19.70
   2   8  -1   91.59   15.70
   2  -8  -1   78.99   15.90
   2   8   1  101.89   19.80
   2   8   1   76.99   15.50
   2  -8  -1   78.79   20.30
   2   8  -2   84.09   15.80
   2  -8   2   64.89   17.40
   2  -8   2   65.39   15.30
   2  -8  -2  103.49   21.90
   2  -8  -2  113.79   16.60
   2   8   2   60.49   19.10
   2   8   2   92.49   16.20
   2   8  -3  260.37   44.50
   2   8   3  261.07   48.20
   2  -8  -3  265.07   44.70
   2  -8  -3  207.88   48.00
   2   8  -4   52.79   15.30
  -2   8   4   51.49   15.00
   2   8  -4   54.19   13.10
   2  -8   4   78.29   15.10
  -2  -8  -4   52.59   15.00
  -2   8   4   50.99   12.80
  -2  -8  -4   69.19   14.20
   2  -8  -4   62.89   14.50
  -2   8  -4   47.00   13.80
   2  -8  -4   32.60   12.00
  -2   8  -4   58.39   13.90
   2   8   4   70.39   14.10
  -2  -8   4   47.40   14.10
   2  -8  -4   61.69   14.20
   2   8   4   36.90   13.50
  -2   8  -4   37.30   14.10
  -2   8   5   62.89   13.70
  -2  -8  -5   49.90   14.20
   2   8  -5   48.60   13.70
   2  -8   5   43.10   14.60
  -2   8   5   22.60   14.10
  -2  -8  -5   32.80   13.60
   2  -8  -5   46.80   14.30
   2   8   5   59.39   14.30
  -2   8  -5   43.00   14.30
   2  -8  -5   52.59   14.80
   2   8   5   48.40   14.40
  -2   8  -5   44.70   14.20
  -2   8  -5   48.90   14.40
  -2   8   6  182.38   29.50
   2   8  -6  158.48   30.60
  -2   8   6  160.28   30.00
  -2   8   6  115.69   30.00
  -2  -8  -6  150.88   30.20
   2   8  -6  175.78   31.50
  -2  -8  -6  155.28   30.40
  -2   8  -6  208.58   32.00
   2  -8  -6  188.58   31.90
   2  -8  -6  133.79   30.30
  -2   8  -6  123.29   29.80
  -2   8  -6  130.09   29.80
   2   8   6  140.39   30.10
   2  -8  -6  147.09   30.80
   2   8   6  180.78   31.20
  -2  -8  -7   20.60   11.20
  -2   8   7   11.40    7.50
  -2   8   7  -15.50   10.70
   2   8  -7   -3.50    7.50
  -2  -8  -7   11.00    7.60
  -2  -8  -7    3.50    8.00
  -2  -8  -7   12.50    7.80
  -2   8   7   17.10    9.30
  -2   8  -7  -14.50   10.50
   2   8   7    4.00    7.40
  -2   8  -7    4.50   10.40
   2   8   7   17.00    8.10
   2  -8  -7   14.50   10.50
   2  -8  -7   -2.40    7.50
  -2   8  -7   27.60    9.90
   2  -8  -7    0.60    8.60
  -2  -8  -8    8.30    8.20
  -2  -8  -8   -5.40    8.80
   2   8  -8    2.80    5.60
  -2   8   8    7.40    9.20
  -2   8   8   -6.50    6.50
   2  -8  -8    2.40    7.60
   2  -8  -8   -5.30    6.10
   2   8   8   24.80    8.20
   2   8   8    4.70    5.60
  -2   8  -8    3.30    6.60
   2  -8  -8    5.60    9.10
  -2   8  -8    3.70    7.60
   3   8   0  654.73  111.89
   3  -8   0  687.33  114.99
   3  -8   0  668.03  112.09
   3  -8   1   69.49   13.70
   3   8  -1   68.59   13.20
   3  -8   1   71.39   17.60
   3  -8  -1   50.59   18.80
   3  -8  -1   66.49   13.70
   3   8   1   69.49   20.00
   3   8   1   74.09   13.50
   3   8  -2  795.82  137.69
   3  -8   2  827.92  140.19
   3  -8  -2  841.12  141.39
   3   8   2  844.92  137.89
   3   8   2  784.92  140.69
   3  -8  -2  819.22  137.89
   3   8  -3   44.80   10.20
   3   8   3   33.10   15.40
   3  -8  -3   40.60   16.20
   3   8   3   40.50   11.00
   3  -8  -3   39.40   10.60
  -3   8   4  162.08   28.60
   3   8  -4  158.08   32.50
  -3   8   4  224.78   33.40
  -3  -8  -4  157.18   32.20
   3  -8   4  212.78   33.00
   3   8  -4  179.48   31.40
  -3   8   4  153.78   30.90
  -3  -8  -4  151.28   31.40
  -3   8  -4  201.68   32.40
  -3   8  -4  176.68   32.00
  -3   8  -4  183.48   32.40
   3  -8  -4  173.68   32.00
   3   8   4  171.78   31.90
   3  -8  -4  172.98   31.50
  -3  -8  -5   30.30   13.50
   3   8  -5   27.60   12.10
  -3   8   5   26.60   13.10
   3   8  -5   23.90   10.70
  -3   8   5   40.50   11.30
  -3  -8  -5   41.80   12.50
   3  -8   5   30.90   13.40
   3  -8  -5   27.10   12.60
  -3   8  -5   37.50   12.90
   3   8   5   31.50   12.70
   3   8   5   38.40   12.30
  -3   8  -5   16.70   12.20
  -3   8  -5   19.90   12.00
   3  -8  -5   30.00   12.70
   3  -8   6  297.47   51.29
  -3   8   6  291.17   51.79
  -3   8   6  270.07   50.79
  -3  -8  -6  251.37   51.29
  -3  -8  -6  286.47   51.69
  -3   8   6  298.87   51.99
  -3  -8  -6  316.57   52.19
   3   8  -6  289.07   52.09
  -3   8  -6  259.17   51.69
   3   8   6  303.07   51.59
   3  -8  -6  278.57   52.19
  -3   8  -6  298.47   52.09
   3   8   6  283.97   51.69
   3  -8  -6  281.87   52.09
   3  -8  -6  292.97   52.19
  -3   8   7   70.49   15.60
   3   8  -7   62.69   12.20
  -3   8   7   27.00   11.40
  -3  -8  -7   22.30   13.10
  -3   8   7   68.89   13.20
  -3  -8  -7   35.30   13.50
   3   8   7   54.69   11.80
  -3   8  -7   19.50   11.70
   3  -8  -7   35.10   13.40
   3  -8  -7   37.50   11.90
   3   8   7   28.90   12.60
  -3   8  -7   41.50   12.00
  -3   8  -7   36.70   12.80
   3  -8  -7   33.20   13.20
  -3  -8  -8   21.70    7.30
   3   8  -8   11.60    8.60
  -3   8   8   20.70    7.00
  -3   8   8   18.50    7.10
  -3  -8  -8   -0.30    9.10
  -3   8  -8   25.50    9.10
  -3   8  -8   20.90    7.90
   3  -8  -8   15.90    9.60
   3   8   8   11.20    5.90
   3  -8  -8   22.70    8.30
   4  -8   0  153.68   33.70
   4   8   0  181.38   34.50
   4   8   0  164.18   29.50
   4  -8   0  176.78   29.80
   4  -8   1  171.48   37.00
   4   8  -1  204.88   32.70
   4  -8   1  177.08   33.20
   4   8   1  173.48   37.50
   4  -8  -1  185.28   33.00
   4   8   1  185.48   32.90
   4  -8  -1  220.38   38.40
   4  -8   2  541.05   93.69
   4  -8   2  525.05   90.69
   4   8  -2  533.15   90.49
   4  -8  -2  526.05   90.79
   4   8   2  573.04   95.59
   4   8   2  557.64   90.79
   4  -8  -2  507.45   94.59
   4  -8   3   76.99   19.80
   4   8  -3   88.39   19.40
   4  -8  -3  122.39   20.50
   4   8   3  151.18   22.10
   4  -8  -3   93.39   25.90
  -4   8  -3  109.09   29.60
  -4   8  -3   90.09   22.70
   4   8   3  107.79   26.00
  -4   8  -3   93.19   21.50
   4   8   3  131.69   20.90
   4   8  -4   59.39   13.30
   4  -8   4   53.29   14.60
  -4   8   4   51.89   15.30
   4   8  -4   49.99   14.00
  -4  -8  -4   72.29   14.60
  -4  -8  -4   38.90   12.40
  -4   8   4   52.19   12.70
  -4   8  -4   49.90   14.50
  -4   8  -4   63.39   14.70
   4  -8  -4   43.50   13.90
   4  -8  -4   78.79   14.40
   4   8   4   40.60   13.80
  -4   8  -4   42.20   17.30
  -4   8   5   79.29   19.80
  -4   8   5   94.69   18.30
   4  -8   5   93.89   19.40
  -4  -8  -5   99.59   19.10
   4   8  -5   86.19   18.50
   4   8  -5   69.09   18.10
  -4   8   5   65.69   19.20
   4   8   5   69.99   18.30
   4  -8  -5   75.99   18.50
   4  -8  -5   83.99   19.80
  -4   8  -5   58.79   20.30
   4  -8  -5   70.29   18.80
  -4   8  -5   86.69   19.20
  -4   8  -5   70.49   18.60
   4   8  -6  135.89   28.20
  -4   8   6  153.78   28.40
  -4  -8  -6  117.19   27.70
  -4  -8  -6  149.99   28.80
  -4   8   6  149.79   29.20
   4  -8   6  155.88   28.40
  -4   8   6  144.19   27.40
  -4   8  -6  114.39   28.50
   4   8   6  131.89   28.40
   4  -8  -6  116.19   28.30
   4  -8  -6  141.99   29.70
  -4   8  -6  168.48   29.40
   4  -8  -6  168.58   28.30
  -4   8   7    1.30    5.60
   4   8  -7    8.90   10.60
  -4   8   7   -6.50    7.80
  -4  -8  -7    0.40    7.30
  -4  -8  -7   12.60   10.70
  -4   8   7    7.30   12.20
   4  -8  -7   11.30   10.80
   4   8   7   -0.70    8.70
   4   8   7    0.60    6.40
   4  -8  -7   -9.20    7.50
  -4   8  -7    6.60    7.00
  -4   8  -7   -4.20    7.30
   4  -8  -7    3.70    8.00
   4   8  -8   51.39   13.50
  -4   8   8   36.50   13.40
  -4  -8  -8   73.39   12.80
  -4   8  -8   55.19   12.00
   4  -8  -8  108.49   17.60
  -4   8  -8   70.39   12.70
   4  -8  -8   46.50   13.20
   5  -8   0  378.46   65.19
   5   8   0  380.46   64.89
   5   8   0  403.56   70.89
   5  -8   0  395.76   69.59
   5  -8   1   66.59   18.10
   5   8  -1   59.89   11.60
   5  -8   1   57.49   12.30
   5  -8  -1   46.20   17.30
   5  -8  -1   63.39   12.50
   5   8   1   56.39   12.10
   5   8   1   73.19   19.20
   5  -8   2   32.50   10.40
   5   8  -2   45.70    9.40
   5  -8   2   24.40   14.20
   5   8   2   51.29   10.30
   5  -8  -2   55.69   10.70
   5   8   2   17.00   15.70
   5  -8  -2   40.20   16.90
   5   8  -3  362.66   57.59
   5  -8   3  174.88   61.49
   5  -8   3  377.06   58.29
  -5   8   3  428.86   60.49
  -5   8   3  290.77   57.59
  -5  -8  -3  334.97   58.89
  -5  -8  -3  315.07   58.29
  -5   8  -3  310.27   58.59
   5  -8  -3  306.67   62.29
   5   8   3  296.77   58.09
   5   8   3  364.06   58.09
  -5   8  -3  310.07   58.39
  -5   8  -3  413.76   59.99
  -5  -8   3  349.17   58.59
  -5   8  -3  332.37   59.79
   5  -8  -3  361.96   58.19
  -5  -8  -4  132.99   24.80
  -5   8   4  133.49   24.20
  -5  -8  -4  147.59   25.50
  -5   8   4  125.39   25.80
  -5   8   4  112.59   21.20
   5   8  -4  137.59   26.20
   5   8  -4  131.39   23.90
  -5  -8   4  162.58   25.70
   5  -8  -4  126.89   24.80
  -5   8  -4  144.09   25.40
  -5   8  -4  118.59   24.60
   5  -8  -4  126.59   23.80
  -5   8  -4  134.19   25.60
   5   8   4  147.79   25.20
   5   8  -5  323.67   53.69
  -5   8   5  340.27   54.59
  -5   8   5  270.97   52.59
   5  -8   5  311.47   53.89
   5   8  -5  271.37   53.79
  -5  -8  -5  304.27   53.89
  -5   8   5  324.17   54.69
  -5   8  -5  311.37   54.29
   5  -8  -5  297.27   53.89
   5   8   5  294.27   53.39
   5  -8  -5  291.07   53.99
   5  -8  -5  300.77   54.49
  -5   8  -5  282.97   54.39
  -5  -8  -6    7.70   11.00
  -5   8   6   10.70   10.60
  -5   8   6    6.40   12.80
  -5   8   6    8.80    9.70
   5  -8   6    7.80   11.30
   5   8  -6    7.50    7.80
  -5  -8  -6   -7.00   11.00
  -5   8  -6   12.10   11.00
   5  -8  -6    7.40    8.00
   5   8   6    6.20   11.00
   5  -8  -6   10.10   11.10
  -5   8  -6    3.30   12.00
  -5  -8  -7   23.10    8.80
  -5  -8  -7   26.10    8.20
  -5   8   7   12.90    9.00
   5   8  -7    6.20    9.80
  -5   8   7   14.60    7.70
  -5   8   7   16.60    9.20
  -5   8  -7   19.50    8.30
   5  -8  -7    9.70   10.20
   5   8   7   19.00    9.60
   5  -8  -7   18.90    9.20
  -5   8  -7   -0.60   10.80
   5  -8  -7   27.50    9.10
   6  -8   0   65.29   18.30
   6   8   0   65.19   12.90
   6   8   0   64.69   20.10
   6  -8   0   74.49   13.60
   6   8  -1  364.16   59.29
   6  -8   1  345.57   59.59
   6  -8   1  314.57   64.39
   6  -8  -1  317.27   64.59
   6  -8  -1  369.16   59.59
   6   8   1  255.37   63.89
   6   8   1  356.96   59.59
  -6  -8  -2   32.30   11.10
   6  -8   2   38.30    9.90
   6   8  -2   26.70    8.70
   6  -8   2   -7.00   15.20
  -6  -8   2   46.20    8.80
  -6  -8   2   39.60   11.80
  -6   8  -2   38.40   11.60
   6  -8  -2   19.00    9.90
  -6   8  -2   28.50   11.80
   6   8   2   35.20    9.40
  -6   8  -2   63.69   15.90
  -6   8  -2   31.30   13.00
   6  -8   3   43.50   12.00
  -6  -8  -3   47.40   12.10
   6   8  -3   42.10   10.50
  -6   8   3   54.79   15.10
  -6  -8  -3   42.20   12.80
  -6   8   3   48.20   11.70
  -6  -8  -3   54.69   12.70
  -6   8  -3   43.10   13.60
   6   8   3   29.50   12.30
   6   8   3   55.79   12.70
   6  -8  -3   63.09   12.50
  -6   8  -3   56.69   14.50
  -6   8  -3   39.50   13.40
   6  -8  -3   33.00   14.40
  -6   8  -3   38.50   16.00
  -6  -8   3   53.39   13.30
   6   8  -4   24.00   10.40
   6   8  -4    8.70    6.50
  -6   8   4    7.10    7.20
  -6   8   4   13.30   12.10
  -6   8   4    5.40   11.50
  -6  -8  -4   10.50    9.10
  -6  -8  -4   -4.20    7.90
   6  -8  -4   12.90    9.90
  -6  -8   4    2.70    6.10
  -6  -8   4   10.40    9.40
   6  -8  -4   19.50    9.90
  -6   8  -4   34.00   12.90
  -6   8  -4   18.80   10.00
  -6   8  -4   -2.50   12.90
  -6   8  -4  -10.10   12.10
   6   8   4   25.10   10.90
   6   8   4   17.70    9.10
  -6   8   5   90.89   22.20
  -6   8   5  128.09   19.40
  -6  -8  -5  119.49   23.70
   6  -8   5  131.79   24.30
   6   8  -5   85.59   22.70
  -6   8   5   71.99   24.30
  -6   8   5   86.49   24.60
   6   8  -5  108.89   22.20
  -6  -8   5  130.29   24.60
  -6   8  -5   75.69   22.70
   6  -8  -5   89.09   23.70
  -6   8  -5   94.49   23.70
   6  -8  -5  122.49   23.80
   6   8   5   85.09   23.40
  -6   8  -5   92.69   23.70
   6  -8  -5  141.19   24.40
  -6   8   6   77.49   16.30
  -6   8   6   80.99   20.40
   6  -8   6   94.89   18.70
  -6  -8  -6   61.29   18.60
  -6  -8  -6   77.59   18.30
  -6   8   6   73.59   18.10
   6   8  -6   89.29   17.20
   6   8  -6  111.49   22.50
   6  -8  -6   92.29   19.40
   6  -8  -6   93.19   18.90
  -6   8  -6   59.59   18.80
   6   8   6   53.59   17.50
  -6   8  -6   99.99   19.90
  -6  -8  -7   -3.10    8.70
   6   8  -7    1.10    8.40
  -6  -8  -7    0.20    9.80
  -6   8   7   -2.60    7.00
  -6   8   7  -13.50    9.50
   6  -8  -7    3.90    9.40
   6  -8  -7    5.20    8.50
  -6   8  -7    2.60    9.20
  -6   8  -7    5.20    6.10
   6  -8  -7   -5.10   10.10
  -7  -8   0   42.10   13.40
   7   8   0   19.30    6.10
  -7  -8   0   15.00    8.40
  -7   8   0   12.10    9.80
  -7  -8   0   15.70    8.30
   7  -8   0   31.50    7.00
  -7  -8  -1   12.10    9.60
  -7  -8  -1   19.80   14.10
  -7  -8  -1   13.00    8.60
   7  -8   1    9.40    6.30
   7   8  -1   22.10    5.40
  -7  -8  -1    9.30    7.70
  -7  -8   1    5.30    5.70
  -7   8  -1   13.40   12.90
   7  -8  -1   27.60    6.90
  -7   8  -1   20.20    9.70
  -7  -8   1   46.90   11.70
  -7  -8   1   16.60    9.10
   7   8   1   16.40    6.20
  -7  -8   1   25.70   10.30
   7  -8   2   -8.20    6.10
  -7  -8  -2    5.70    8.90
   7   8  -2    1.40    4.50
  -7   8   2   -8.20   10.10
  -7  -8  -2   -3.00   10.70
  -7  -8  -2    6.30    8.30
  -7  -8   2    0.70   10.30
  -7   8  -2    5.10    9.30
   7   8   2   -4.10    6.00
   7  -8  -2    6.40    7.20
  -7  -8   2    7.80    5.10
  -7  -8   2    3.20    9.40
  -7   8  -2    5.60   13.00
  -7   8  -2   -0.10    6.80
  -7  -8   2   13.40    9.00
   7  -8   3   76.89   14.80
  -7  -8  -3   56.09   14.30
  -7   8   3   45.60   16.30
  -7  -8  -3   77.89   17.50
   7   8  -3   52.69   12.40
  -7  -8  -3   77.49   15.50
   7  -8  -3   62.69   13.90
  -7   8  -3   51.59   18.00
  -7  -8   3   42.90   15.10
  -7   8  -3   40.00   15.20
   7   8   3   65.89   14.80
  -7   8  -3   61.39   16.10
  -7   8  -3   85.99   16.20
   7   8   3   50.69   13.30
  -7   8   4  140.59   34.70
  -7  -8  -4  176.28   33.80
   7  -8   4  218.48   34.30
   7   8  -4  186.48   32.90
  -7  -8  -4  170.08   33.50
  -7   8   4  228.48   35.20
   7   8   4  192.38   34.10
   7   8   4  177.28   33.50
  -7   8  -4  154.28   34.00
   7  -8  -4  194.68   34.20
  -7  -8   4  175.88   34.00
  -7   8  -4  162.18   35.10
   7  -8  -4  198.48   33.20
  -7   8  -4  146.49   32.90
  -7   8  -4  190.38   35.80
   7  -8   5    9.80   10.80
  -7  -8  -5   12.20   10.70
  -7  -8  -5   -1.90    9.40
   7   8  -5   13.10   10.40
  -7   8   5  -11.50   13.10
   7   8  -5    2.60    9.90
  -7   8   5    7.00   13.20
   7  -8  -5   16.10   10.70
   7   8   5    1.50    9.60
  -7   8  -5   22.40   11.80
   7  -8  -5   23.20    9.50
  -7  -8   5   42.10   13.40
  -7   8  -5  -15.10   10.10
  -7  -8   5    1.00    5.70
   7  -8  -5    9.70   11.80
  -7   8  -5   15.20   10.80
   7  -8   6   15.90   10.50
  -7  -8  -6   29.50   12.70
  -7   8   6    4.10   12.40
  -7  -8  -6   25.40   10.20
   7   8  -6   15.30   10.10
  -7   8   6   15.10   10.20
  -7   8  -6   -0.10   10.50
   7  -8  -6   21.20   10.00
  -7   8  -6   14.50    8.90
   7  -8  -6   26.20   11.60
   7   8  -7   -1.80    7.20
  -7  -8  -7    0.80    5.40
  -7   8   7   -1.50    6.50
  -7   8   7   -7.30    9.20
  -7  -8  -7    8.60    9.50
  -7   8  -7   -3.90    7.20
   7  -8  -7   -0.90    9.70
  -7   8  -7    7.60    8.30
   7  -8  -7   11.10    8.10
  -8  -8   0  127.39   24.60
  -8  -8   0  105.69   22.70
   8  -8   0  110.39   20.80
  -8   8   0   94.79   24.00
  -8  -8   0   98.39   23.70
   8   8   0  118.69   20.60
  -8  -8   0  131.99   23.30
  -8  -8  -1   53.99   13.40
   8   8  -1   35.00    8.00
   8  -8   1   29.50    9.10
  -8  -8  -1   51.49   17.90
  -8  -8  -1   46.30   12.30
  -8   8  -1   38.30   12.40
  -8  -8   1   37.00   13.70
   8   8   1   31.20    8.30
  -8  -8   1   35.70   13.00
  -8   8  -1   40.50   17.50
  -8  -8   1   27.70   11.60
   8  -8  -1   29.40    9.00
  -8   8   2   -6.40   11.40
  -8  -8  -2   -0.70    9.60
  -8  -8  -2   -2.40   12.40
  -8  -8  -2    3.40    9.20
   8   8  -2    3.30    4.80
   8  -8   2   -5.10    5.40
   8  -8  -2   12.20    6.60
  -8   8  -2    3.70    8.00
  -8  -8   2   -6.40    5.80
  -8   8  -2    8.80   13.50
  -8  -8   2   -0.50   11.00
  -8  -8   2    8.20   10.30
  -8  -8   2    8.60   11.70
   8   8   2   -0.70    6.30
  -8   8  -2   -5.80   10.20
  -8   8   3   12.10    4.10
  -8  -8  -3   16.10   10.80
   8  -8   3   24.80    9.50
  -8  -8  -3   19.60   10.60
  -8   8   3   15.30   13.50
  -8  -8  -3   24.30   11.30
   8   8  -3    7.60    6.70
   8   8   3   35.20   12.30
  -8  -8   3    3.20    7.00
  -8   8  -3   36.60   12.20
  -8  -8   3   17.60   12.00
   8  -8  -3   12.10    8.80
   8   8   3   25.60    9.70
  -8   8  -3   16.80   10.90
  -8   8  -3   27.60   14.20
   8   8  -4  103.69   16.60
  -8  -8  -4   96.49   18.00
  -8   8   4   40.70   20.20
  -8  -8  -4   79.59   16.10
   8  -8   4   90.29   18.20
  -8   8  -4   90.19   19.60
  -8   8  -4   81.79   19.20
   8   8   4   87.19   18.20
   8   8   4   32.30   16.00
  -8  -8   4   57.69   18.50
  -8   8  -4   51.29   19.40
   8  -8  -4   65.79   15.90
  -8   8  -4  114.59   19.40
   8   8  -5   26.20   11.20
  -8   8   5    6.00   14.30
   8  -8   5   14.20   10.90
  -8  -8  -5   28.10   10.20
  -8  -8  -5   23.90   12.40
  -8   8   5    3.80   13.00
  -8  -8   5   45.60   14.40
  -8  -8   5   10.40   10.00
  -8   8  -5   38.50   12.00
   8  -8  -5   19.00   12.90
   8  -8  -5   23.00    9.40
  -8   8  -5    4.40   11.30
  -8   8   6   14.10    8.90
   8  -8   6    3.60    9.40
  -8   8   6   -8.20   12.20
  -8  -8  -6   16.90    8.80
  -8  -8  -6   18.40    8.90
  -8   8  -6   26.70   10.70
   8  -8  -6   29.80   10.80
   8  -8  -6   23.30   10.60
  -8   8  -6    1.00    9.50
  -8  -8  -7   11.30    8.70
  -8   8   7   -1.60    6.50
  -8  -8  -7   10.80    7.70
  -8   8   7   -2.60    5.70
   8  -8  -7    3.00    6.00
  -8   8  -7   -2.70    4.40
  -8   8  -7    2.80    6.20
  -9  -8   0   12.60   14.10
  -9   8   0    9.80   12.50
   9   8   0   -3.20    5.10
  -9  -8   0   28.00   11.40
   9  -8   0    1.80    5.60
  -9  -8   0    3.30    8.90
  -9  -8   0  -22.70    7.90
  -9  -8  -1   62.39   21.60
   9  -8   1   42.10   10.80
   9   8  -1   31.40    9.40
  -9  -8  -1   58.79   14.00
  -9  -8  -1   47.90   14.70
  -9  -8   1   32.20   14.40
  -9  -8   1   67.89   16.20
  -9   8  -1   49.30   17.00
   9  -8  -1   47.30   10.90
   9   8   1   43.40   10.00
  -9   8  -1   43.40   14.30
  -9   8   2   -1.30    3.30
  -9   8   2  -15.50   11.60
  -9  -8  -2   -4.20    6.90
   9   8  -2    0.10    5.60
  -9  -8  -2    7.20   14.00
  -9  -8  -2   -4.50   10.40
   9  -8   2   10.60    6.70
   9   8   2   -3.50    6.80
   9  -8  -2    9.70    6.80
  -9  -8   2    5.50   11.50
  -9  -8   2   -2.60   10.80
  -9   8  -2   -0.70   10.50
  -9  -8   2   -3.00    5.00
  -9   8  -2   13.90   14.80
  -9  -8   2   -0.80    9.90
   9   8  -3   27.10    9.40
  -9  -8  -3   43.50   13.70
  -9   8   3   -1.00   15.10
   9  -8   3   51.29   11.90
  -9  -8  -3   36.80   13.60
  -9   8  -3   16.10   10.60
  -9   8  -3   10.80   13.00
  -9   8  -3   15.80   16.00
   9   8   3   34.30   11.10
   9  -8  -3   46.20   10.60
   9   8   3   32.30   10.90
  -9  -8   3   25.70   13.40
   9   8  -4   25.10    8.00
  -9  -8  -4   18.90   10.50
  -9  -8  -4   22.90    8.30
  -9   8   4   13.80   15.70
   9  -8   4   21.30    9.90
  -9   8  -4   -2.30   13.90
   9   8   4   11.40    9.20
  -9   8  -4   18.90   12.10
  -9  -8   4    8.30    9.40
  -9   8  -4   18.10    9.90
  -9  -8   4   31.40   13.60
   9  -8  -4   26.10    8.80
  -9   8   5   31.20   21.10
  -9  -8  -5  103.89   18.80
  -9  -8  -5  133.29   22.60
   9   8  -5   99.49   19.30
   9  -8  -5  116.19   20.60
  -9  -8   5   95.59   22.10
   9  -8  -5   77.99   20.80
  -9   8  -5   81.19   19.60
  -9   8  -5  119.29   20.80
  -9   8   6   33.60   16.90
  -9  -8  -6   23.20    7.70
  -9  -8  -6   30.90   11.30
  -9   8   6   19.20    9.50
   9  -8   6    9.60    6.90
  -9   8  -6   20.30    8.50
  -9  -8   6   29.50    8.90
  -9   8  -6   14.40   10.00
  10   8   0   17.30    5.70
 -10   8   0    1.50   12.90
  10  -8   0    1.90    7.30
 -10  -8   0    4.50    9.40
 -10  -8   0   20.20   12.50
 -10  -8   0   14.60   18.50
 -10  -8  -1   91.09   25.30
  10   8  -1   39.70   11.00
  10  -8   1   70.19   12.70
 -10  -8  -1   38.50   14.90
 -10  -8  -1   66.29   17.80
 -10   8  -1   65.89   16.50
 -10  -8   1   75.39   17.30
  10   8   1   50.19   11.70
 -10  -8   1   35.90   17.30
  10  -8  -1   47.70   12.20
 -10   8  -1   55.89   18.70
 -10  -8  -2    6.50   11.70
 -10   8   2    0.90    3.70
  10  -8   2   12.90    8.50
 -10  -8  -2   28.10   13.10
  10   8  -2    9.70    6.20
 -10  -8   2    2.90    8.90
 -10   8  -2   20.30   12.10
  10  -8  -2   14.70    7.50
  10   8   2    9.50    7.80
 -10  -8   2   11.20    9.40
 -10   8  -2   10.00   15.80
 -10  -8   2   20.60   11.80
 -10   8   3    3.90   15.10
  10  -8   3   -0.50    7.40
 -10   8   3   -3.20    3.40
 -10  -8  -3   -7.60   10.60
  10   8  -3    1.00    6.20
  10  -8  -3    1.00    7.70
  10   8   3    9.70    7.40
 -10   8  -3   -2.60   10.30
 -10  -8   3    2.40    8.80
 -10   8  -3    2.20   12.00
 -10  -8   3    3.20   12.50
 -10  -8  -4    5.30    9.90
 -10  -8  -4    3.70    9.60
 -10   8   4  -32.10   14.60
  10   8  -4    2.60    7.80
  10  -8   4    1.20   10.90
 -10   8  -4    9.40    8.40
  10  -8  -4  -13.90    6.30
 -10  -8   4   19.20   12.50
 -10  -8   4   12.80    7.60
  10   8   4   12.90   10.30
 -10   8  -4    6.00   13.80
 -10   8   5   -3.20    3.20
 -10  -8  -5   -7.20    6.70
  10  -8   5   -3.20    9.10
 -10   8   5   -8.70   13.40
 -10   8  -5    0.50    7.00
 -10  -8   5    4.00    7.70
 -10  -8   5    2.30   11.40
  10  -8  -5    3.90    6.90
 -10   8   6   12.00    7.60
 -10  -8  -6    1.80    8.90
  10  -8   6    1.20    5.10
 -10  -8   6    5.80    6.80
 -10  -8   6    2.80    4.40
  10  -8  -6    0.60    6.40
 -10   8  -6    2.50    7.90
 -11  -8   0   17.10   23.00
 -11  -8   0   12.60   13.40
  11  -8   0   -9.20    7.20
  11   8   0   -9.30    5.80
 -11   8   0  -13.50   12.20
  11   8  -1  173.38   28.00
 -11  -8  -1  142.89   32.10
 -11  -8  -1  166.68   36.10
  11  -8   1  186.48   28.80
  11   8   1  150.58   28.00
 -11  -8   1  156.98   33.00
  11  -8  -1  140.39   27.70
 -11  -8   1  118.59   30.60
 -11   8  -1  142.29   32.40
 -11  -8  -2   10.40   13.40
  11   8  -2   27.20    7.30
  11  -8   2   26.30   10.50
  11  -8  -2   18.10    8.00
 -11   8  -2    9.90   16.40
  11   8   2   31.00    9.80
 -11  -8   2   -1.40   12.00
 -11  -8   2   45.60   15.20
 -11  -8   2   17.00   11.50
 -11   8  -2   22.50   13.10
  11  -8   3   41.70   11.70
 -11  -8  -3   40.70   14.00
  11   8  -3   37.20    8.90
 -11   8   3   11.90   14.80
 -11   8  -3   35.60   13.10
 -11  -8   3   16.30    8.70
  11   8   3   38.10   10.60
 -11   8  -3   19.20   12.80
  11  -8  -3   16.30    8.20
 -11  -8   3   14.90   12.90
 -11  -8  -4    3.90    8.50
  11  -8   4    5.20   10.50
 -11   8   4   -1.20    2.70
 -11   8   4   10.40   14.90
 -11   8  -4   -6.90   13.90
 -11  -8   4   21.60   11.60
 -11   8  -4    8.90    8.50
 -11  -8   4    7.60    8.30
  11  -8   5   -1.20    6.00
 -11   8   5    3.50    8.70
 -11  -8  -5   -6.30    8.80
 -11   8   5   -0.80    3.20
 -11  -8   5    5.40    7.30
 -11   8  -5   -7.90    6.20
 -11  -8   5    6.70    7.70
 -12  -8   0   15.20   14.20
  12  -8   0   41.60   10.10
  12   8   0   38.20    8.80
 -12  -8   0   48.60   27.20
 -12   8   0   15.70   14.30
  12   8  -1  131.39   20.70
 -12  -8  -1   49.50   23.70
  12  -8   1  130.59   21.90
  12  -8  -1   94.39   20.40
  12   8   1  109.89   21.00
 -12  -8   1  145.89   26.70
 -12  -8   1  111.29   25.40
 -12   8  -1  114.09   26.60
  12   8  -2  120.49   21.50
  12  -8   2   97.49   21.80
 -12  -8  -2  177.68   26.80
 -12  -8   2   82.29   24.10
  12   8   2  158.18   23.00
  12  -8  -2  110.99   21.50
 -12   8  -2  136.59   28.40
 -12  -8   2   71.59   25.10
 -12  -8  -3   19.60   11.60
 -12   8   3  -12.10   18.30
 -12   8   3   -1.20    2.60
 -12  -8   3   31.60   12.40
 -12   8  -3   -3.40   11.10
 -12  -8   3   -3.40   12.20
 -12   8  -3   12.70   15.60
 -12   8   4   29.00   10.10
  12  -8   4   41.80    9.70
 -12  -8  -4   21.40    9.90
 -12   8  -4    4.90   10.30
 -12  -8   4   16.00   11.80
 -12   8  -4   36.10   11.60
 -12  -8   4   18.60    9.30
  12  -8   5    6.70    5.70
 -12   8   5    7.30   10.50
 -12  -8   5    8.30    8.70
 -12   8  -5    6.30    5.90
 -12  -8   5   -5.10    6.70
 -13  -8   0   12.80   16.60
  13  -8   0   15.80    7.70
 -13   8   0    8.90    9.80
 -13  -8   0   19.50   13.80
  13   8   0   16.40    7.10
 -13  -8  -1    8.70   13.40
  13  -8   1   14.40    8.80
 -13  -8   1    7.70   12.70
 -13  -8   1   17.80   17.00
 -13   8  -1    6.70   11.30
  13   8   1   21.70    9.00
  13  -8   2   54.79   14.00
 -13  -8  -2  108.09   19.00
 -13   8  -2  111.19   18.60
 -13  -8   2   34.70   15.70
 -13  -8   2   95.49   18.50
 -13  -8  -3  -10.10    6.50
 -13   8   3   -2.00    3.40
  13  -8   3   -1.60    9.00
 -13   8  -3  -24.00   12.40
 -13  -8   3    6.80   13.60
 -13  -8   3   11.70    8.40
 -13   8   4   12.40   11.70
 -13  -8  -4    0.00    6.70
 -13   8   4    3.50    2.50
  13  -8   4   13.10    6.40
 -13  -8   4    8.80    7.00
 -13  -8   4   31.80    9.40
 -14  -8   0   -2.80    8.10
 -14  -8  -1   13.40   12.60
 -14   8  -1   11.20    9.60
 -14  -8   1  -19.40    9.60
 -14  -8   1   18.80   14.80
 -14  -8  -2    2.70    7.80
 -14   8   2    3.60    2.50
 -14   8  -2   -8.40   12.70
 -14  -8   2    4.60   19.30
 -14   8   3   -0.20    1.90
 -14  -8  -3    4.80    6.20
  14  -8   3   -0.40    6.10
 -14  -8   3    0.20    6.30
 -14  -8   3   -2.90   14.60
 -15  -8   0    1.70    9.70
 -15  -8  -1    6.60   10.60
 -15  -8   1   11.80   10.50
 -15  -8  -2   39.70   12.40
   0  -9   0    5.90    9.30
   0   9  -1  176.08   32.00
   0  -9   1  189.58   34.10
   0   9   1  206.58   34.00
   0  -9  -1  150.98   35.10
   0  -9  -2 1191.78  203.18
   0  -9  -3 1098.59  188.58
   0   9   4  168.98   28.90
   0   9  -4  118.19   28.60
   0  -9  -4  155.88   29.30
   0  -9  -4  162.48   29.50
   0  -9   4  191.98   30.30
   0   9  -4  145.09   28.80
   0   9   4  140.99   29.10
   0   9   5  174.28   31.70
   0   9   5  156.58   30.50
   0  -9  -5  128.09   30.10
   0   9  -5  149.49   31.10
   0  -9  -5  186.68   31.20
   0   9  -5  162.68   30.10
   0  -9   5  161.98   31.20
   0   9  -5  176.68   32.00
   0  -9  -5  146.59   30.80
   0   9   6    5.50   11.00
   0   9  -6    3.30   11.70
   0  -9  -6    5.70   11.40
   0  -9  -6    0.40    9.00
   0  -9  -6   12.10   12.10
   0   9  -6   15.20    9.60
   0   9   6   21.10   12.30
   0   9  -7    8.30    8.50
   0   9  -7   -0.30   10.60
   0  -9  -7   -3.80    8.00
   0   9   7   -9.90    7.20
   0  -9  -7    8.00    7.60
   0  -9  -7    8.90    8.30
   0   9   7   -5.80    9.80
   0  -9  -7    2.30   10.80
   0   9   8   76.19   16.70
   0   9   8   69.79   17.00
   0  -9  -8   81.39   16.80
   0  -9  -8  115.19   18.20
   0   9  -8   99.79   17.60
   1  -9   0 1937.71  337.47
  -1  -9   0 2094.09  337.27
   1   9   0 1984.20  335.47
   1  -9   1  322.67   57.09
  -1  -9  -1  315.47   58.19
   1   9  -1  340.97   54.89
   1   9   1  300.17   54.99
   1  -9  -1  343.07   59.39
   1  -9  -1  298.67   55.09
  -1  -9   1  326.87   56.19
   1   9   1  364.56   57.59
   1   9  -2  327.97   52.79
  -1  -9  -2  333.07   57.39
   1  -9   2  313.67   54.19
   1  -9  -2  274.27   52.79
   1   9   2  293.97   55.69
   1  -9  -2  326.47   57.89
   1   9  -3  238.28   40.70
   1  -9  -3  206.38   45.60
   1  -9   4  161.58   31.10
   1   9  -4  142.29   30.20
  -1   9   4  175.28   30.60
  -1   9   4  162.38   31.40
  -1  -9  -4  166.38   30.90
  -1  -9  -4  195.98   31.80
  -1   9  -4  192.48   31.40
  -1  -9   4  143.39   30.60
   1  -9  -4  155.58   30.60
   1  -9  -4  137.69   30.40
   1   9   4  178.08   30.90
  -1   9  -4  172.78   31.10
  -1   9  -4  152.68   30.00
   1   9   4  169.38   31.10
  -1  -9  -5  461.85   98.79
  -1  -9  -5  548.85   98.49
  -1   9   5  552.34   98.39
   1   9  -5  619.74   99.19
  -1  -9  -5  585.44   98.49
   1  -9   5  627.34   98.59
  -1   9   5  573.34   98.09
  -1   9  -5  605.24   98.79
  -1   9  -5  557.44   98.09
   1   9   5  565.04   98.29
   1  -9  -5  550.24   98.59
  -1   9  -5  610.24   98.79
   1  -9  -5  532.25   98.49
   1  -9  -5  592.94   98.69
   1   9   5  618.74   98.49
  -1   9   6  473.45   83.19
   1   9  -6  466.25   83.69
   1   9  -6  443.06   82.69
  -1   9   6  499.15   82.99
  -1  -9  -6  485.45   83.59
  -1  -9  -6  473.35   82.99
  -1  -9  -6  460.55   83.59
   1  -9  -6  486.55   83.59
  -1   9  -6  517.75   84.19
  -1   9  -6  446.66   83.69
  -1   9  -6  494.65   83.29
   1  -9  -6  526.05   84.29
   1   9   6  483.45   82.79
   1   9   6  482.15   83.29
   1  -9  -6  487.65   83.79
  -1   9   7   42.90   10.60
  -1  -9  -7   14.50    7.00
  -1  -9  -7   41.20   10.20
   1   9  -7   17.00    9.10
  -1   9   7   34.40   11.50
  -1  -9  -7   29.00    9.60
  -1  -9  -7   18.40    9.60
  -1   9  -7   21.20   12.10
   1  -9  -7   38.70   12.80
  -1   9  -7   17.50   11.80
  -1   9  -7   24.80    8.40
   1   9   7   14.20   11.40
   1  -9  -7   26.10   10.00
   1  -9  -7   10.80   12.10
   1   9   7   18.20   11.80
  -1   9   8   18.60   10.00
   1   9  -8   47.70    8.40
  -1  -9  -8   46.50   12.00
  -1  -9  -8   27.60    8.10
  -1   9   8   34.50    7.90
   1  -9  -8   27.60   10.40
   1   9   8   27.90    8.20
   1  -9  -8   28.90    9.40
  -1   9  -8   13.50   12.00
   1   9   8   15.70    8.90
   1  -9  -8    1.90    7.50
   2   9   0   66.19   14.80
  -2  -9   0   74.69   18.50
   2  -9   0   90.79   19.80
   2  -9   0   93.79   15.70
   2   9  -1 1096.99  181.68
   2  -9   1 1049.09  181.68
  -2  -9  -1 1049.30  183.98
   2  -9   1 1056.99  183.78
   2  -9  -1 1095.29  181.78
   2   9   1 1078.89  181.58
   2  -9  -1 1070.69  184.68
   2   9   1 1167.88  184.18
   2   9  -2  427.36   73.29
   2  -9  -2  461.55   77.79
   2   9   2  424.66   73.59
   2   9   2  489.85   76.59
   2  -9  -2  409.86   73.49
   2   9  -3  285.57   46.00
   2  -9  -3  249.78   51.19
   2  -9  -3  270.37   46.10
   2   9   3  202.28   48.70
   2  -9   4   75.99   16.40
   2   9  -4   64.79   14.60
   2   9  -4   60.59   15.30
  -2   9   4   53.59   13.90
  -2  -9  -4   76.69   16.50
  -2   9   4   45.60   15.70
  -2  -9  -4   57.39   16.20
  -2  -9   4   69.49   15.70
   2   9   4   81.19   16.00
   2  -9  -4   67.19   15.60
   2   9   4   58.19   15.10
   2  -9  -4   47.50   15.40
  -2   9  -4   58.49   14.70
  -2   9  -4   49.40   15.10
  -2   9  -4   60.09   15.40
  -2  -9  -5   16.60   10.60
  -2   9   5    6.00   11.20
  -2  -9  -5    4.70   10.90
  -2   9   5    4.40   11.30
   2   9  -5   -2.10    9.80
   2  -9   5    7.50   11.20
   2  -9  -5  -11.30    9.90
  -2   9  -5   16.90    9.80
   2   9   5   -2.50    9.90
  -2   9  -5    2.20   10.30
   2  -9  -5    1.80   10.70
  -2   9  -5  -12.90   10.10
   2   9   5   -7.00   10.10
  -2  -9  -6   46.90   14.10
   2   9  -6   38.20   13.60
  -2   9   6   37.40   10.70
  -2  -9  -6   28.50   13.00
  -2   9   6   39.40   13.90
   2  -9   6   22.40   13.90
  -2   9   6   19.20   13.50
   2   9   6   33.50   13.20
   2  -9  -6   45.10   14.30
   2   9   6   29.40   13.50
  -2   9  -6   29.30   13.70
   2  -9  -6   23.10   13.80
   2  -9  -6   60.29   15.20
  -2   9  -6   46.90   13.30
  -2   9  -6   25.00   13.80
   2   9  -7    5.50   10.80
  -2   9   7   19.00   11.50
  -2   9   7   -3.80   11.40
  -2  -9  -7   11.10   11.00
  -2  -9  -7   12.40   11.40
  -2  -9  -7    8.70   10.40
  -2   9   7   16.10    9.80
   2  -9  -7   -5.00   11.20
   2  -9  -7   11.00    7.70
   2  -9  -7   11.00    8.00
   2   9   7   18.70   10.60
  -2   9  -7    1.20    9.40
  -2   9  -7   -0.90   10.10
  -2   9  -7    1.80    8.10
   2   9   7    3.00   10.80
   2   9  -8   89.39   17.90
  -2   9   8   86.19   17.30
  -2  -9  -8   82.49   18.10
   2   9   8  106.09   17.60
   2  -9  -8   85.29   18.40
   3  -9   0   11.50   10.30
   3   9   0   11.60    5.30
   3  -9   0   -7.80    4.50
   3   9   0   21.30   13.20
   3  -9   1  652.23  114.79
   3   9  -1  672.23  111.99
   3  -9   1  656.53  112.19
   3   9   1  664.33  112.09
   3  -9  -1  681.93  115.79
   3   9   1  689.73  115.19
   3  -9  -1  655.33  112.09
   3   9  -2  174.18   30.70
   3  -9   2  159.68   33.60
   3  -9   2  182.48   31.10
   3  -9  -2  196.88   31.20
   3   9   2  159.58   30.80
   3  -9  -2  122.99   34.80
   3   9   2  193.68   36.00
   3  -9   3   39.90   12.30
   3   9  -3   44.20   11.10
  -3   9   3   44.30   11.90
   3  -9  -3   54.59   20.20
   3  -9  -3   40.80   11.70
   3   9   3   38.40   16.40
   3   9   3   49.50   13.10
   3   9   3   54.49   13.90
  -3  -9  -4   28.40   11.60
  -3   9   4    5.90    7.90
  -3  -9  -4   13.90    9.30
  -3   9   4   -0.70   10.70
   3   9  -4   20.80    9.70
   3   9  -4    1.40    7.20
   3  -9   4    2.20   10.20
   3  -9  -4   16.20   12.20
   3  -9  -4   14.00   10.40
  -3   9  -4   18.20   10.80
   3   9   4   30.40   14.10
   3   9   4   16.70   10.00
  -3   9  -4   25.80   11.60
  -3  -9   4   27.60   10.90
  -3   9  -4    9.00    9.80
  -3   9   5   37.70   14.00
   3  -9   5   41.30   14.50
  -3  -9  -5   50.49   13.70
  -3   9   5   51.59   14.00
   3   9  -5   49.10   13.50
  -3  -9  -5   27.80   14.50
   3  -9  -5   29.10   11.50
   3   9   5   51.99   14.00
  -3   9  -5   33.30   16.30
  -3   9  -5   26.20   12.80
   3  -9  -5   41.90   13.90
   3   9   5   39.80   13.60
  -3   9  -5   26.10   13.50
  -3   9   6   64.19   22.50
   3  -9   6   87.79   22.10
  -3  -9  -6   96.99   22.60
  -3   9   6  112.69   22.50
   3   9  -6  167.18   24.60
  -3   9   6  129.29   22.50
  -3  -9  -6  127.29   23.70
   3   9   6  159.78   23.70
  -3   9  -6   51.29   21.10
   3   9   6   88.09   22.60
  -3   9  -6  142.49   24.70
   3  -9  -6   84.29   22.70
   3  -9  -6  173.48   25.60
  -3   9  -6  134.89   25.00
   3  -9  -6   99.69   23.20
  -3  -9  -7    6.80    7.80
  -3   9   7   -6.90    8.00
  -3   9   7   11.00   11.60
  -3   9   7   -9.20    5.40
   3   9  -7  -21.10    9.70
  -3  -9  -7    3.40   10.40
   3  -9  -7    2.60   10.30
   3  -9  -7    5.60    6.90
   3   9   7    0.70    9.60
  -3   9  -7   -6.00    6.00
   3  -9  -7    3.40   10.80
  -3   9  -7   22.00   11.50
   3   9   7   -4.50    6.90
  -3   9   8  -11.10    8.80
  -3   9   8    0.00    5.60
   3   9  -8   10.30    5.50
  -3   9  -8    6.80    6.90
   3  -9  -8    6.00    8.60
   4  -9   0   -3.00   10.80
   4  -9   0    1.80    5.70
   4   9   0    9.80   11.30
   4   9   0   -5.70    4.50
   4  -9   1  261.47   47.20
   4   9  -1  242.18   42.40
   4  -9   1  242.68   42.80
   4  -9  -1  236.28   47.40
   4   9   1  281.87   48.70
   4  -9  -1  250.47   42.70
   4   9   1  241.08   42.50
   4   9  -2   69.39   14.40
   4  -9   2   83.79   21.60
   4  -9   2   69.09   14.50
   4  -9  -2   76.69   15.40
   4   9   2   78.79   15.30
   4  -9  -2   72.79   21.50
   4   9   2   97.39   22.20
  -4   9   3   28.30   10.30
   4   9  -3   45.00   10.80
   4  -9   3   34.30   11.30
  -4  -9  -3   47.60   11.80
   4  -9   3   32.40   12.00
  -4  -9  -3   52.79   12.10
   4   9  -3   61.79   13.60
   4   9   3   31.30   11.60
   4   9   3   49.50   12.70
  -4   9  -3   72.39   13.70
   4  -9  -3   35.30   10.50
   4  -9  -3   39.30   12.80
  -4  -9   3   42.50   12.80
  -4   9  -3   43.30   13.50
  -4  -9   3   76.69   16.40
   4   9  -4   39.00   11.80
  -4  -9  -4   50.59   14.30
  -4  -9  -4   44.50   13.00
  -4   9   4   34.20   13.80
  -4   9   4   48.80   13.10
   4  -9   4   54.69   14.00
   4   9  -4   45.70   13.10
  -4   9  -4   61.19   18.50
  -4   9  -4   45.70   13.70
   4  -9  -4   32.80   13.30
  -4   9  -4   59.49   13.90
   4   9   4   43.40   13.40
   4  -9  -4   28.30   13.10
   4   9  -5  101.09   24.90
   4  -9   5  150.68   27.60
   4   9  -5  113.89   26.10
  -4   9   5  142.89   27.90
  -4  -9  -5  191.38   28.10
  -4   9   5  110.19   25.20
  -4   9   5  142.69   22.50
   4  -9  -5  156.28   28.20
   4  -9  -5  120.99   26.80
  -4   9  -5   91.39   25.70
  -4   9  -5   77.49   27.10
   4   9   5  121.39   26.80
  -4   9  -5  117.79   27.10
   4  -9   6   24.10   11.30
  -4   9   6   18.00   13.00
  -4  -9  -6   28.80   12.40
  -4   9   6   26.30   10.20
  -4   9   6    1.30   12.40
  -4  -9  -6    9.30   11.50
   4   9  -6   14.40   11.40
   4   9   6   17.50   11.80
  -4   9  -6   17.10    9.70
   4  -9  -6    3.10   11.80
   4  -9  -6   -2.40   13.40
   4  -9  -6    6.40    8.90
  -4   9  -6   13.80    8.80
  -4  -9  -7   71.79   18.30
  -4   9   7  115.49   18.90
  -4   9   7  109.79   17.50
  -4   9   7   69.39   19.00
  -4   9  -7   56.19   17.30
   4  -9  -7   61.19   18.10
   4  -9  -7   72.09   18.40
   4  -9  -7   68.09   19.00
  -4   9  -7   66.19   18.70
   4   9   7  106.19   18.90
   4   9   7  103.99   17.70
   5   9   0   63.09   19.70
   5  -9   0   58.49   20.10
   5  -9   0   78.99   14.80
   5   9   0   76.49   14.30
   5   9  -1  150.48   26.50
   5  -9   1  143.19   31.50
   5  -9   1  167.38   27.20
   5  -9  -1  158.58   27.00
   5  -9  -1  153.98   32.90
   5   9   1  123.29   31.80
   5   9   1  133.89   26.60
  -5  -9  -2   89.99   19.30
   5   9  -2   95.69   18.00
   5  -9   2  101.49   18.90
   5  -9   2   83.69   23.70
   5   9   2  106.49   18.70
   5  -9  -2   89.29   25.10
   5  -9  -2   90.89   18.60
  -5   9  -2   96.09   22.20
   5   9   2   81.89   26.50
  -5  -9  -3  158.78   26.90
  -5   9   3  138.19   26.20
   5   9  -3  146.69   27.40
  -5  -9  -3  167.68   27.40
   5   9  -3  112.89   25.30
  -5   9   3  139.99   23.90
   5  -9   3  135.59   26.30
   5  -9  -3  149.79   26.60
  -5   9  -3  128.69   26.40
  -5   9  -3  125.09   26.70
  -5  -9   3  139.99   27.00
   5  -9  -3  109.79   26.90
  -5   9  -3  165.08   31.20
   5   9   3  141.39   26.00
  -5   9  -3  139.89   27.80
  -5  -9   3  169.48   27.90
   5   9   3  153.88   28.30
  -5  -9  -4   30.40   11.50
   5  -9   4   49.50   13.20
  -5   9   4   30.30   10.30
  -5  -9  -4   26.80   10.60
   5   9  -4   34.20    9.80
  -5   9   4   37.60   13.60
   5   9  -4   41.70   11.80
  -5   9  -4   29.20   13.40
   5  -9  -4   48.20   12.70
  -5  -9   4   34.10   11.80
   5   9   4   48.30   12.80
   5  -9  -4   41.20   12.40
  -5   9  -4   18.00   12.10
   5   9  -5   76.69   16.80
  -5   9   5   70.29   11.20
   5   9  -5   34.30   15.60
  -5   9   5   53.29   17.50
   5  -9   5   54.49   16.80
  -5  -9  -5   65.29   16.90
  -5   9   5   43.40   17.50
  -5   9   5   68.49   15.10
   5  -9  -5   69.99   17.60
  -5   9  -5   37.50   15.90
   5  -9  -5   65.19   18.20
  -5   9  -5   30.90   16.40
   5  -9  -5   44.60   16.40
   5   9   5   48.50   16.20
  -5   9   6   23.50   13.40
  -5  -9  -6    7.90   11.90
  -5  -9  -6   13.00   11.50
   5  -9   6   -6.00   10.30
   5   9  -6   29.70   11.80
  -5   9   6    6.50   12.60
  -5   9   6   25.40    9.70
  -5   9  -6   26.60   12.70
   5   9   6    8.90   11.00
   5  -9  -6   11.20   11.30
  -5   9  -6   12.20   11.20
   5  -9  -6   11.70    9.10
  -5   9   7   12.60   11.40
  -5   9   7   20.80    9.20
  -5  -9  -7   24.30    9.20
  -5  -9  -7   21.90   10.50
  -5   9   7   31.80    9.50
   5   9  -7   18.60    8.40
  -5   9  -7   21.50    8.70
   5   9   7   12.80    8.80
   5  -9  -7   15.10    8.50
  -5   9  -7   27.10    8.70
   5  -9  -7   24.60   11.40
   5  -9  -7   42.80   11.90
   6   9   0   14.20    5.80
   6   9   0   -8.20   15.90
   6  -9   0    4.00    5.70
   6  -9   0   -6.30   12.10
  -6  -9  -1   -6.40    8.30
  -6  -9  -1    5.90    7.50
   6   9  -1   -5.70    5.10
   6  -9   1    6.70    6.30
  -6  -9  -1    0.80    6.60
   6  -9   1   22.60   13.70
  -6   9  -1  -12.10   11.50
   6  -9  -1   10.40    6.80
  -6  -9   1   -7.60    7.20
  -6  -9   1   13.80   10.30
  -6   9  -1    4.70    8.40
   6   9   1    7.00    5.20
  -6  -9   1    4.20   13.20
  -6  -9   1   10.40    8.90
  -6   9   2   12.60    6.90
  -6  -9  -2   11.40   10.50
  -6  -9  -2    0.20    9.60
   6   9  -2   10.60    5.60
   6  -9   2    9.10    7.20
  -6  -9  -2    6.40    8.60
  -6  -9  -2    1.50    7.10
  -6  -9   2   12.40    9.40
   6  -9  -2    0.00    7.00
  -6   9  -2    4.90    9.10
  -6  -9   2    2.90    4.20
  -6  -9   2   26.40   10.50
   6   9   2    7.10    6.60
  -6   9  -2    7.80    7.70
  -6  -9   2    8.60    9.00
  -6   9  -2    6.10   12.70
  -6  -9  -3  163.18   27.30
   6   9  -3  143.79   25.30
  -6  -9  -3  139.19   29.50
  -6   9   3  141.39   25.70
   6  -9   3  159.88   26.60
  -6   9   3  136.39   23.40
  -6  -9  -3  113.89   25.90
   6   9   3  140.29   26.70
   6  -9  -3  143.19   26.10
  -6   9  -3  140.89   27.60
  -6  -9   3  157.28   27.40
  -6  -9   3  139.59   27.00
  -6   9  -3  109.79   26.60
  -6   9  -3  143.49   29.30
   6  -9  -3  143.19   28.00
   6   9   3  176.38   27.20
  -6   9  -3   91.59   26.00
   6   9  -4   28.70   10.80
  -6   9   4   -2.40   11.80
   6  -9   4   39.40   12.10
  -6  -9  -4   15.30    9.30
  -6  -9  -4   18.70    9.60
  -6   9   4   13.80    9.00
  -6   9   4   19.30   12.50
   6   9  -4   24.10    9.30
   6   9   4   18.40   10.00
   6  -9  -4    4.80    9.70
  -6   9  -4    2.60   10.10
  -6   9  -4   25.70   11.10
   6  -9  -4   26.10    9.30
  -6   9  -4   14.00   11.60
  -6  -9   4   -2.40    7.20
  -6  -9   4   17.70   10.00
   6   9  -5  -13.00    9.20
  -6  -9  -5   -0.20   10.30
  -6   9   5   -1.50    9.10
   6  -9   5  -11.10   10.10
   6   9  -5  -18.30    7.60
  -6   9   5    6.20    9.60
  -6   9   5    1.80    9.40
  -6   9  -5  -17.10   10.90
  -6   9  -5   10.60   11.50
  -6  -9   5   -7.20    4.70
  -6  -9   5    6.90   12.20
   6  -9  -5  -21.80    9.40
   6  -9  -5    0.40   12.50
   6  -9  -5   -5.20   11.30
   6   9   5    2.40   10.20
  -6   9   6    9.30    9.60
  -6  -9  -6   19.60   10.50
   6   9  -6   -5.20    6.60
  -6   9   6   15.90   12.60
  -6  -9  -6   -3.40   11.00
   6  -9   6    7.90   10.10
  -6   9   6    9.10    8.80
  -6   9  -6   11.90   11.40
  -6   9  -6    3.60   10.90
   6  -9  -6   19.80   11.80
  -6  -9   6  -12.50    7.30
   6   9   6   -4.90    9.70
   6  -9  -6   -0.70    9.70
  -6  -9  -7    9.70    6.50
  -6  -9  -7    3.80    9.70
  -6   9   7    5.80    7.70
  -6   9   7   -8.80    9.70
   6   9  -7   -0.70    7.70
   6  -9  -7    4.60    8.60
  -6   9  -7   10.20    6.70
  -6   9  -7   13.20    6.70
   6  -9  -7    0.40    7.00
   6  -9  -7    1.00    6.40
   7  -9   0   38.60   10.20
  -7  -9   0   41.90   13.00
  -7  -9   0   39.40   14.90
   7   9   0   48.00    9.80
  -7   9   0   24.60   14.30
  -7  -9   0   42.30   11.70
  -7  -9   0   49.50   14.90
  -7  -9  -1   78.59   18.10
   7  -9   1   60.89   15.30
  -7  -9  -1   68.39   17.00
  -7  -9  -1   65.99   16.60
  -7   9   1   66.79   15.20
  -7  -9  -1   72.69   20.50
   7   9  -1   77.69   14.90
  -7  -9   1   99.69   17.50
  -7   9  -1   49.70   18.80
  -7  -9   1   88.89   17.90
   7   9   1   79.09   15.20
  -7   9  -1   91.29   18.50
  -7   9  -1   79.79   15.80
  -7  -9   1   98.59   19.10
   7  -9  -1   91.29   15.50
   7   9  -2   34.90    8.60
  -7  -9  -2   34.10   10.90
  -7  -9  -2   41.30   12.80
   7  -9   2   16.90    9.00
  -7   9   2   21.90   14.10
  -7   9   2   33.80    8.40
  -7  -9  -2   46.70   12.10
  -7  -9   2   44.60   12.10
  -7  -9   2   35.20   13.20
  -7  -9   2   28.10   13.10
   7  -9  -2   29.30    9.30
  -7  -9   2   14.80    8.10
  -7   9  -2   40.20   11.80
  -7   9  -2   33.90   10.90
  -7   9  -2   32.20   14.70
   7   9   2   36.00    9.10
   7  -9   3   13.60    7.30
  -7   9   3    3.30    7.20
  -7   9   3   -5.90   12.00
   7   9  -3   10.50    6.90
  -7  -9  -3   -1.50    9.20
  -7  -9  -3   -2.50    8.90
  -7  -9  -3   13.40    9.60
  -7  -9   3   14.60    7.10
   7   9   3   -5.10    6.90
  -7   9  -3   -8.10    8.70
   7   9   3    3.60    9.00
  -7   9  -3   -2.70   13.40
   7  -9  -3    6.20    8.60
  -7  -9   3   -0.10    9.40
  -7   9  -3   -3.20    9.80
  -7   9   4    4.70    9.50
  -7  -9  -4    0.20    8.70
  -7   9   4   11.20    7.90
   7  -9   4   -4.70   10.70
  -7  -9  -4   14.80    9.40
   7   9  -4  -12.40    7.60
  -7   9  -4   -2.00   10.20
   7   9   4    0.30   10.90
  -7   9  -4  -10.10   10.30
   7   9   4    7.60    9.40
  -7  -9   4    2.90    8.20
   7  -9  -4   -9.90    9.10
   7  -9  -4    4.90   10.10
  -7  -9   4   -1.60   10.70
  -7   9  -4  -14.60   12.80
   7  -9   5    8.30   11.00
  -7   9   5   -2.70   12.10
   7   9  -5   14.80   10.60
  -7  -9  -5   20.60   10.10
  -7  -9  -5   36.70   12.20
  -7   9   5   15.20   14.30
   7   9  -5   27.30   11.20
  -7   9  -5   18.60   11.70
  -7  -9   5   12.90   12.70
   7  -9  -5   35.10   11.50
   7   9   5   29.80   11.30
  -7  -9   5   -2.10    8.70
   7  -9  -5    3.90    9.20
  -7   9  -5   26.80   12.10
   7  -9  -5   15.50   12.60
   7  -9   6    7.70    9.70
   7   9  -6   11.50    9.40
  -7   9   6   -8.80   11.90
  -7  -9  -6   10.10    9.20
  -7  -9  -6    6.40   11.30
  -7   9   6    5.80   11.80
   7  -9  -6   -1.30   10.40
   7  -9  -6    7.80    9.00
  -7   9  -6   12.80    7.90
  -7  -9   6    1.40    6.10
  -7   9  -6   17.30    8.50
  -7  -9  -7    5.00    7.50
   7   9  -7   18.10    7.90
   7  -9   7    1.10    6.70
  -7  -9  -7    8.80    6.80
  -7   9   7   19.10    7.70
  -7   9   7   13.80    6.80
  -7   9  -7   11.10    6.00
   7  -9  -7   27.80    7.70
  -7   9  -7   11.00    7.90
   7  -9  -7    9.80    6.70
   7  -9  -7    2.70    7.70
  -8  -9   0   79.29   16.70
  -8  -9   0   66.99   17.80
  -8   9   0   64.89   18.50
  -8  -9   0   73.69   16.10
   8  -9   0   52.69   14.10
  -8  -9   0   78.19   19.40
   8   9   0   68.89   13.50
   8   9  -1   25.70    7.40
  -8  -9  -1    9.30   17.10
  -8  -9  -1   23.60    9.70
   8  -9   1   18.00    8.10
  -8  -9  -1   43.70   11.20
  -8  -9  -1   23.40   11.10
   8  -9  -1   28.30    7.90
  -8   9  -1   34.20   14.40
  -8  -9   1   17.60   10.90
  -8  -9   1    5.90    9.20
  -8   9  -1   29.90   11.50
  -8   9  -1   22.30    8.20
   8   9   1   23.00    7.80
  -8  -9   1   36.10   13.20
  -8  -9   1   37.00   12.30
  -8  -9  -2  113.79   23.70
  -8  -9  -2   90.09   20.90
   8  -9   2   76.09   18.20
  -8  -9  -2  106.29   21.30
  -8   9   2  101.69   22.10
   8   9  -2   89.89   18.20
  -8   9  -2   96.09   19.70
   8  -9  -2   82.49   18.70
  -8   9  -2   85.49   23.10
   8   9   2  105.99   19.00
  -8   9  -2  111.89   21.90
  -8  -9   2  101.59   22.00
  -8  -9   2   99.89   21.60
  -8  -9   2   92.09   20.30
  -8  -9  -3  102.39   21.60
   8   9  -3   97.99   18.40
  -8   9   3   83.89   22.70
  -8  -9  -3   87.09   20.30
  -8   9  -3   83.39   23.60
  -8  -9   3   90.99   20.80
  -8   9  -3   94.59   19.40
   8   9   3  111.59   20.80
  -8   9  -3   81.49   20.70
   8   9   3   88.69   19.00
   8  -9  -3   94.99   19.60
  -8  -9  -4   19.60   10.20
  -8   9   4   17.90   15.90
   8  -9   4   47.80   13.10
   8   9  -4   41.60   10.40
  -8   9  -4  -14.30   10.80
  -8  -9   4   16.60   10.30
   8   9   4   29.10   11.30
  -8   9  -4   29.30   15.80
   8  -9  -4   15.00   10.80
  -8  -9   4   42.60   13.60
  -8   9  -4   22.90   11.00
   8   9   4   31.50   12.10
  -8   9   5   -0.90    2.40
  -8  -9  -5   11.80    8.90
  -8   9   5   -5.00   14.10
   8  -9   5   18.70   10.70
  -8   9   5  -17.00   12.20
   8   9  -5   10.00    8.20
  -8  -9  -5   15.10   11.00
  -8  -9   5    2.80    7.10
  -8   9  -5   -0.30    7.70
   8  -9  -5   -4.80   11.70
   8  -9  -5   -6.20    8.60
   8   9   5   24.40   10.40
  -8   9  -5    4.50   10.30
  -8  -9   5    7.70   12.80
   8  -9  -5    6.70    9.90
   8  -9   6   73.99   21.80
  -8   9   6   70.59   22.60
  -8   9   6  123.19   19.10
  -8  -9  -6  113.09   22.50
  -8   9   6   85.69   21.80
  -8  -9  -6  129.49   22.00
   8  -9  -6   90.89   22.60
   8  -9  -6  108.49   22.10
  -8   9  -6  105.29   22.40
  -9  -9   0  223.88   33.40
  -9  -9   0  194.98   35.60
  -9   9   0  203.58   35.60
   9  -9   0  183.98   31.10
  -9   9   0  154.68   28.70
   9   9   0  196.38   30.50
  -9  -9   0  159.68   31.90
  -9  -9   0  196.18   33.80
   9   9  -1   80.29   15.80
   9  -9   1   75.49   16.70
  -9  -9  -1   84.39   19.80
  -9  -9  -1   78.89   19.00
  -9  -9  -1   69.99   25.40
  -9  -9   1  121.09   21.80
  -9   9  -1   86.09   20.10
  -9   9  -1   73.69   21.30
   9   9   1   75.79   16.40
  -9  -9   1   80.09   20.50
  -9  -9   1   95.19   19.60
   9  -9  -1   79.09   16.50
  -9   9   2   -1.30    3.60
  -9  -9  -2   23.10   13.30
   9  -9   2   -5.00    8.30
  -9   9   2   -1.30   13.40
  -9  -9  -2  -18.00    9.10
   9   9  -2   -3.30    6.40
  -9  -9  -2   -1.90   10.80
   9  -9  -2   12.80    8.70
  -9  -9   2    7.80   11.50
  -9  -9   2    2.30    6.70
  -9   9  -2  -14.30   13.70
  -9  -9   2   -3.90   10.80
  -9  -9   2   -2.20    9.90
   9   9   2    2.00    7.70
  -9   9  -2    6.40   11.30
   9  -9   3    3.30    9.90
   9   9  -3   32.40    8.40
  -9   9   3   15.40   11.70
  -9  -9  -3   13.10   11.40
  -9  -9  -3   15.60   12.60
  -9   9  -3   16.30    8.90
   9   9   3   28.20    9.20
   9  -9  -3   22.50    9.70
  -9   9  -3   29.10   16.30
  -9   9  -3   14.70   12.50
  -9  -9   3   14.80   10.00
  -9  -9   3   22.10    9.90
   9   9   3    4.40    9.50
   9  -9   4    7.80    9.00
  -9  -9  -4    9.10    7.40
  -9   9   4    1.20   14.70
  -9  -9  -4   17.50    9.70
   9   9  -4   15.00    9.00
   9  -9   4   36.60   12.00
  -9  -9   4   12.70   12.30
  -9   9  -4   10.60   11.40
   9   9   4    4.50    9.30
  -9   9  -4    0.30   10.60
   9  -9  -4   20.20    9.80
  -9   9  -4   -4.50    8.60
   9   9   4   18.30    9.30
  -9  -9   4   15.30   11.00
   9  -9   5   38.70   10.20
  -9  -9  -5   48.90   11.70
  -9  -9  -5   40.90   13.00
  -9   9   5   47.60   13.20
  -9   9  -5   29.50   13.10
   9  -9  -5   32.10   11.10
  -9   9  -5   55.29   13.30
  -9  -9   5   15.10   12.20
  -9  -9   5   65.49   15.30
  -9  -9  -6   13.70    6.90
  -9  -9  -6    0.50    7.00
  -9   9   6    2.50    7.30
   9  -9   6   -3.00    5.30
  -9  -9   6    1.60    4.40
  -9   9  -6    9.90    6.50
  -9   9  -6   -0.50    5.80
   9  -9  -6    4.00    7.60
 -10  -9   0   -1.60   11.70
  10  -9   0    9.70    7.20
 -10   9   0   -4.80   12.50
 -10  -9   0   30.00   21.60
 -10  -9   0    9.80    9.60
  10   9   0    2.00    5.60
 -10   9   1    0.60    3.50
 -10  -9  -1    1.90   11.90
  10   9  -1   20.90    7.10
 -10  -9  -1   14.70   11.60
 -10  -9  -1   52.59   23.10
  10  -9   1   13.00    8.30
 -10  -9   1   34.20   15.80
 -10   9  -1   18.10   15.00
  10  -9  -1    7.70    7.10
  10   9   1    8.00    7.60
 -10  -9   1    3.10   11.30
 -10  -9   1   26.00   12.50
 -10  -9  -2   22.30   14.90
 -10  -9  -2   47.20   15.80
  10   9  -2   50.29   11.50
  10  -9   2   46.60   13.00
  10   9   2   69.89   13.20
 -10  -9   2   18.80   15.80
 -10  -9   2   67.09   16.40
 -10   9  -2   34.80   15.10
 -10   9  -2   59.99   18.50
  10  -9  -2   49.20   12.00
 -10  -9  -3   37.50   13.60
  10  -9   3   27.40   11.40
  10   9  -3   34.30    8.90
 -10   9   3   15.30   15.40
  10   9   3   43.10   11.90
  10  -9  -3   34.40    9.90
 -10   9  -3   55.59   14.80
 -10  -9   3   39.30   14.00
  10   9   3   27.70   10.90
 -10  -9   3   13.80    9.10
 -10   9  -3   17.10   16.10
  10   9  -4   49.50   10.60
 -10   9   4   10.90   16.50
  10  -9   4   43.30   13.70
  10  -9   4   41.10   16.20
  10   9   4   37.30   11.70
 -10   9  -4   16.80   13.80
 -10  -9   4   41.00   13.80
  10  -9  -4   42.30   10.90
 -10  -9   4   49.10   12.80
 -10   9  -4   27.60   16.70
 -10   9   5    0.50    3.30
 -10  -9  -5   25.90   10.30
 -10   9   5    7.50   13.40
  10  -9   5    1.80    9.30
  10  -9  -5   20.80   10.30
 -10  -9   5   -1.80    8.10
 -10  -9   5    1.00    7.30
 -10   9  -5   -7.50    8.90
 -10  -9  -6   -1.30    8.20
  10  -9   6    4.10    5.20
 -10   9   6   -0.40    6.60
  10  -9  -6    5.60    8.80
 -10   9  -6    4.50    7.30
 -10  -9   6    0.60    3.10
  11   9   0   -3.00    6.70
  11  -9   0   21.40    8.60
 -11   9   0    0.40   13.40
 -11  -9   0   52.29   25.70
 -11  -9   0   15.60   13.10
  11  -9   1   30.70    9.90
  11   9  -1   34.80    9.10
 -11  -9  -1   48.10   16.00
 -11  -9  -1   32.30   21.90
 -11  -9   1   32.80   14.60
 -11  -9   1   37.20   19.70
 -11  -9   1    9.10   12.90
  11   9   1   25.60    9.20
 -11   9  -1   33.90   13.30
  11  -9  -1   28.90    9.20
  11   9  -2   46.70    9.20
  11  -9   2   23.80    9.20
 -11  -9  -2   56.39   16.20
  11  -9  -2   39.00    9.90
  11   9   2   58.79   11.90
 -11  -9   2   28.40   13.40
 -11  -9   2   41.40   16.10
 -11  -9   2   14.40   10.30
 -11   9  -2   47.70   14.30
 -11   9  -2   29.10   13.40
 -11  -9  -3   15.60   13.20
  11   9  -3   43.90   10.00
 -11   9   3   50.59   13.10
  11  -9   3   41.10   12.30
  11   9   3   35.40   10.30
  11  -9  -3   35.60    9.40
 -11   9  -3   29.20   17.30
 -11  -9   3   24.70   11.70
 -11  -9   3   26.50   13.80
 -11   9  -3   47.50   14.80
 -11  -9  -4   65.49   12.50
  11  -9   4   47.40   12.40
 -11   9   4   15.50   15.20
 -11  -9   4   45.90   14.30
 -11  -9   4   19.40   10.00
 -11   9  -4   10.40   11.40
 -11   9   5  -15.80    7.60
  11  -9   5    2.40    6.30
 -11   9   5    0.00    2.20
 -11   9  -5    0.70    8.80
 -11  -9   5    4.20    9.50
  11  -9  -5    6.10    7.60
 -11  -9   5   17.50   11.50
 -12  -9   0  151.08   29.80
 -12  -9   0  183.38   37.80
 -12   9   0  116.49   29.00
  12   9  -1    2.60    6.00
 -12   9   1   -3.20    3.30
  12  -9   1    5.80    7.20
 -12  -9  -1   -1.90   16.20
 -12  -9  -1   21.90   14.30
 -12  -9   1   -5.10    8.80
  12   9   1   -0.30    7.40
  12  -9  -1   -4.70    6.70
 -12  -9   1   17.20   16.50
 -12  -9   1   12.90   13.80
 -12   9  -1  -23.20   13.30
  12   9  -2   79.79   13.00
  12  -9   2   59.69   13.80
 -12  -9  -2   52.39   16.90
  12  -9   2   41.50   12.10
 -12   9  -2   32.50   17.90
  12  -9  -2   47.20   11.80
  12   9   2   72.39   13.60
 -12  -9   2   70.99   16.50
 -12  -9   2   36.50   15.30
 -12  -9   2   34.20   15.60
  12  -9   3   26.90    9.10
 -12  -9  -3   17.40   11.90
 -12  -9   3   19.40   14.40
 -12   9  -3   20.00   12.50
 -12  -9   3   24.00   10.10
  12  -9   4   10.60    9.80
 -12  -9  -4   21.20    9.60
 -12   9   4   -9.60    7.20
 -12  -9   4   18.10   11.50
 -12   9  -4    0.90    9.40
 -12  -9   4   23.20    9.20
  12  -9   5    1.50    7.30
 -12   9   5   -1.20    1.80
 -12  -9   5    2.40    7.20
 -12  -9   5    1.60    5.10
 -13   9   0  201.18   38.70
 -13  -9   0  183.78   40.90
 -13  -9  -1   96.29   22.90
 -13  -9   1   95.19   22.30
 -13  -9   1   88.99   24.80
 -13   9  -1   86.39   23.10
 -13  -9  -2   18.40   10.00
  13  -9   2   14.20   12.60
 -13  -9   2   17.40   11.70
 -13   9  -2    0.70   14.30
 -13  -9   2   15.80   14.50
 -13  -9  -3    4.50    9.50
 -13   9   3   -2.10    2.30
  13  -9   3   -2.00    8.00
 -13   9  -3   -7.50    9.20
 -13  -9   3    4.60    7.70
 -13  -9   3    5.40   10.70
  13  -9   4    6.90    8.00
 -13  -9   4   -3.10   12.10
 -13  -9   4    8.00    8.70
 -14  -9   0   -1.10   11.60
 -14  -9  -1   24.70   10.50
 -14  -9   1   21.40   20.40
 -14  -9   1   22.90    9.90
 -14   9  -1   17.30   13.60
 -14   9   2   29.20    6.10
 -14  -9  -2   19.90   11.90
 -14  -9   2   26.60   14.50
 -14  -9  -3    1.60    5.20
 -14   9   3    3.00    3.40
 -14  -9   3   26.20   10.70
 -15  -9   0    2.70    6.70
 -15  -9  -1   25.90    9.30
   0  10   0  490.15   85.49
   0 -10   0  504.45   86.59
   0 -10  -1   31.10   16.70
   0 -10   1   73.39   15.40
   0  10   1   73.69   15.30
   0 -10  -2  258.97   49.30
   0 -10   3   84.39   22.70
   0  10   3  110.29   22.50
   0  10  -3   89.89   22.10
   0 -10  -4  126.79   26.60
   0  10   4  154.48   27.40
   0 -10   4  184.28   28.00
   0  10   4  111.39   26.00
   0  10  -4  151.88   27.70
   0  10  -4  114.39   26.30
   0 -10  -4  132.49   26.60
   0 -10  -5   83.79   19.60
   0 -10   5   81.19   21.40
   0  10   5   86.69   20.70
   0 -10  -5  115.19   20.80
   0  10  -5   70.29   20.20
   0 -10  -5   89.49   20.30
   0  10  -5   82.09   20.40
   0  10   5  102.29   20.00
   0  10   6  107.29   28.70
   0  10   6  148.89   28.90
   0  10  -6  110.59   28.80
   0 -10  -6  153.88   29.10
   0 -10  -6  175.28   30.10
   0 -10  -6  164.48   29.00
   0  10  -6  176.68   29.00
   0  10  -7    1.30    9.80
   0  10   7    3.90   10.40
   0 -10  -7   -4.60   11.00
   0 -10  -7   -3.40    6.50
   0  10   7    2.90    7.30
   0 -10  -7   -8.90   10.80
   0 -10  -7    4.80    7.30
   0 -10  -8    0.90    7.20
   0  10   8    2.40    5.70
   0  10  -8   -2.50    6.00
   0  10   8    5.60    6.90
   1 -10   0  229.08   38.00
   1  10   0  208.78   36.40
  -1 -10   0  200.18   36.90
   1  10   0  188.08   33.60
   1 -10   0  171.48   33.40
   1  10  -1  250.57   41.00
  -1 -10  -1  261.77   45.50
   1 -10   1  214.88   43.60
   1  10   1  292.67   44.80
  -1 -10   1  219.58   41.90
   1  10   1  240.08   41.10
   1 -10  -1  214.38   45.10
   1 -10  -1  216.08   41.20
   1  10  -2   27.40    9.10
  -1 -10  -2   36.90   14.60
   1 -10  -2   29.00    9.60
   1 -10  -2   75.89   17.50
   1 -10   3  244.88   45.70
   1  10  -3  310.07   44.60
  -1  10   3  273.57   45.30
   1  10  -3  249.68   46.20
  -1 -10   3  280.47   45.50
   1  10   3  215.48   44.40
   1 -10  -3  250.57   45.40
  -1  10  -3  189.38   45.40
  -1  10   4   37.00   12.80
   1 -10   4   28.50   12.80
  -1  10   4   33.30   11.00
  -1 -10  -4   35.20   12.80
   1  10  -4   28.70   12.90
  -1 -10  -4   26.40   11.70
   1  10   4   33.00   11.10
   1 -10  -4   28.00   11.80
   1  10   4   20.70   11.60
  -1  10  -4   38.10   12.10
   1 -10  -4   24.90   11.50
  -1 -10   4   35.00   12.90
  -1  10  -4   28.80   11.80
  -1  10  -4   36.40   11.30
  -1  10   5  135.49   28.00
  -1 -10  -5  156.38   30.00
   1 -10   5  142.39   28.70
  -1 -10  -5  169.38   29.30
   1  10  -5  190.68   30.00
  -1  10   5  101.59   28.30
   1 -10  -5  149.49   29.90
   1 -10  -5  180.98   29.00
   1  10   5  113.29   28.60
   1 -10  -5  151.48   29.40
  -1  10  -5  121.09   28.70
  -1 -10   5  111.39   28.10
  -1  10  -5  177.48   30.00
   1  10   5  174.48   29.10
  -1  10  -5  156.68   29.20
  -1  10   6   62.39   15.20
  -1 -10  -6   40.50   16.00
   1  10  -6   70.89   16.60
  -1 -10  -6   51.49   13.80
  -1  10   6   67.39   16.90
   1 -10  -6   46.20   15.80
   1 -10  -6   32.20   15.50
  -1  10  -6   31.40   15.50
   1  10   6   61.69   16.30
  -1  10  -6   79.59   15.70
   1 -10  -6   47.80   14.50
  -1  10  -6   41.40   15.90
   1  10   6   83.69   14.90
  -1 -10  -7   21.60    8.10
   1  10  -7   -1.20   10.20
  -1 -10  -7   20.20   11.50
  -1  10   7   -7.80   10.90
  -1  10   7   17.90    8.20
  -1 -10  -7    4.00   10.60
  -1  10   7    8.10    7.20
   1 -10  -7    0.90   11.10
  -1  10  -7    4.60    7.40
  -1  10  -7   12.50    6.40
   1 -10  -7    0.70    6.90
   1 -10  -7   13.90    8.70
  -1  10  -7   12.90    8.20
   1  10   7   -7.90   10.00
   1  10   7    9.10    7.70
  -1 -10  -8    1.70    7.40
  -1  10   8    0.00    4.40
   1  10  -8   -3.60    5.00
  -1  10   8   -7.80    7.90
   1 -10  -8   -1.00    5.10
   1  10   8   -5.10    7.40
   1  10   8    1.10    5.50
   2  10   0  941.91  160.48
   2  10   0  964.80  157.98
  -2 -10   0  928.91  159.98
   2 -10   0  941.41  158.08
   2 -10   0  889.21  161.08
   2 -10   1   89.99   23.90
  -2 -10  -1  115.09   24.10
   2  10  -1   96.59   19.50
   2 -10   1  121.79   20.00
   2  10   1  121.19   24.90
   2 -10  -1   78.39   19.70
   2 -10  -1  121.19   24.20
   2  10   1  117.09   19.80
   2  10  -2   -1.40    6.10
   2 -10  -2   -1.70   11.40
   2  10   2   -7.60    6.70
   2 -10  -2   -7.40    6.70
   2  10   2   14.70   12.70
   2  10  -3   86.59   21.50
  -2  10   3   97.79   21.30
   2 -10   3  112.49   22.40
  -2  10   3  121.79   24.90
   2  10  -3  108.49   20.80
  -2  10  -3  126.99   22.50
   2  10   3  100.29   22.10
  -2  10  -3  104.89   23.60
  -2 -10   3  113.29   22.70
   2 -10  -3  154.08   24.30
   2 -10  -3  120.79   22.00
   2  10  -4   59.19   17.10
  -2  10   4  100.59   19.20
  -2 -10  -4   67.79   17.10
  -2  10   4   80.29   16.70
   2 -10   4   68.89   18.00
   2  10  -4  100.79   22.80
  -2 -10  -4   62.79   16.90
  -2 -10   4  101.99   18.40
  -2  10  -4   76.79   16.70
   2 -10  -4   78.39   18.10
   2  10   4   76.19   19.10
   2  10   4   76.89   17.40
  -2  10  -4   65.99   17.40
   2 -10  -4   81.59   18.30
  -2  10  -4   58.69   17.30
  -2  10   5    8.30   11.80
   2  10  -5   24.70   11.30
  -2 -10  -5    4.80   10.50
  -2 -10  -5   19.10   14.10
  -2  10   5    2.50    9.80
   2 -10   5   22.40   12.70
   2 -10  -5    7.90   11.60
  -2  10  -5    2.40   11.20
   2  10   5    8.10   11.20
   2 -10  -5    3.10   11.60
   2  10   5   10.30   10.40
  -2  10  -5   10.70   11.30
  -2  10  -5   20.50   10.40
  -2 -10  -6   45.80   15.90
  -2  10   6   82.19   16.20
  -2 -10  -6   66.89   16.50
  -2  10   6   31.30   15.70
  -2  10   6   79.59   17.40
   2  10  -6   31.70   15.60
   2 -10   6   49.90   15.10
   2 -10  -6   46.80   16.20
   2  10   6   83.99   17.30
  -2  10  -6   79.29   16.00
  -2  10  -6   49.99   16.10
   2 -10  -6   59.79   16.40
   2  10   6   57.49   15.90
  -2  10  -6   56.29   17.00
   2 -10  -6   69.19   16.90
  -2  10   7   10.30    8.50
   2  10  -7    7.70   10.40
  -2 -10  -7    6.10    8.10
  -2  10   7   31.00   12.70
  -2 -10  -7   27.30   11.50
  -2 -10  -7   12.10   10.20
  -2  10   7   13.40    7.20
  -2  10  -7   24.40   10.30
   2  10   7   -1.50   10.00
   2 -10  -7   19.80    8.60
   2  10   7    7.00   10.30
   2 -10  -7   33.80   12.10
   2 -10  -7   17.00    7.90
  -2  10  -7    5.40    7.80
  -2  10  -7    5.80    8.90
   3 -10   0  147.19   29.70
   3 -10   0  129.19   24.90
   3  10   0  152.38   29.60
   3  10   0  137.09   24.80
   3  10  -1   50.09   13.90
   3 -10   1   89.49   20.70
   3 -10   1   93.19   15.20
   3 -10  -1   88.89   20.50
   3  10   1   78.49   14.30
   3 -10  -1   60.89   14.00
   3  10   1   85.79   19.70
   3 -10   2  155.28   27.20
   3 -10   2  118.09   29.30
   3  10  -2  142.09   26.70
   3  10   2  167.38   27.40
   3 -10  -2  161.68   27.30
   3  10   2  109.39   30.30
   3 -10  -2  138.79   32.40
  -3 -10  -3    4.10    7.40
  -3  10   3    3.50    9.80
   3  10  -3    4.70    7.40
   3  10  -3   14.80   10.30
  -3  10   3    7.90    7.20
   3 -10   3   -6.00    8.50
  -3 -10  -3    6.80    7.40
   3 -10  -3    3.00    8.40
   3 -10  -3   -4.80    8.90
  -3  10  -3   -5.40    7.50
  -3 -10   3    1.90    4.40
  -3 -10   3   -2.90    9.10
  -3  10  -3    0.90   11.00
  -3  10  -3   11.00    8.90
   3  10   3  -18.10   10.40
  -3  10   4  139.39   24.90
  -3 -10  -4  139.59   27.90
  -3  10   4  150.98   27.80
   3  10  -4  127.89   27.40
  -3 -10  -4  137.39   27.70
   3  10  -4  164.98   28.70
   3 -10   4  144.09   29.00
  -3  10  -4  154.78   28.80
   3 -10  -4  148.89   28.70
  -3 -10   4  200.98   29.60
  -3  10  -4  155.68   29.00
   3  10   4  138.59   28.60
   3 -10  -4  128.79   29.00
   3  10   4  180.58   29.90
   3 -10  -4  160.58   29.40
  -3  10  -4  186.08   29.00
  -3  10   5  173.88   30.70
  -3 -10  -5  153.78   31.00
   3  10  -5  172.78   32.20
  -3  10   5  181.28   32.10
   3 -10   5  137.39   31.00
  -3 -10  -5  132.69   30.20
  -3  10  -5  160.38   32.40
   3 -10  -5  185.38   32.20
   3  10   5  187.28   31.80
  -3  10  -5  107.89   29.60
   3 -10  -5  166.98   31.70
   3  10   5  216.28   32.30
  -3  10  -5  162.48   31.90
  -3 -10  -6   86.79   22.50
  -3  10   6   44.90   18.80
  -3  10   6   59.59   19.40
  -3 -10  -6  104.89   20.10
  -3  10   6   74.09   17.80
   3  10  -6  123.89   20.30
   3 -10   6   58.49   18.40
   3  10   6  124.79   20.50
  -3  10  -6  125.49   19.40
  -3  10  -6   87.29   19.60
   3 -10  -6   56.39   19.30
   3 -10  -6   97.49   21.20
   3  10   6   91.59   18.70
  -3  10  -6   63.09   19.20
   3 -10  -6   68.29   19.20
  -3  10   7   22.60   11.50
   3  10  -7    9.80   10.60
  -3  10   7   11.50    8.70
  -3 -10  -7    7.20   10.70
  -3  10   7   11.80   12.20
  -3 -10  -7    6.20   10.60
   3 -10  -7   17.70    7.10
  -3  10  -7   13.40    9.40
   3  10   7   15.00    7.40
   3 -10  -7   15.00    8.60
   3  10   7   13.10   10.30
  -3  10  -7   24.70    9.00
   3 -10  -7    5.50   10.20
   4  10   0  110.09   27.00
   4 -10   0  129.89   26.60
   4  10   0  107.39   20.60
   4 -10   0  115.99   21.10
   4 -10   1   98.49   15.70
   4  10  -1   78.59   14.80
   4 -10   1   65.99   19.60
   4 -10  -1   57.69   20.40
   4  10   1   63.89   14.80
   4  10   1   61.79   19.90
   4 -10  -1   77.49   15.30
   4 -10   2   60.29   15.70
   4  10  -2   39.70    9.10
   4 -10   2   25.00    9.60
   4 -10   2   10.20   15.60
   4  10   2   24.30   16.00
   4 -10  -2   42.80   10.40
   4  10   2   36.50   10.00
   4 -10  -2    6.20   14.90
  -4 -10  -3  192.58   32.50
  -4 -10  -3  179.88   32.20
   4  10  -3  212.38   31.90
   4 -10   3  181.98   32.70
  -4  10   3  214.68   33.40
  -4  10   3  144.89   29.30
   4  10  -3  166.98   32.10
  -4  10   3  155.08   31.50
  -4  10  -3  182.48   32.90
   4 -10  -3  250.17   34.80
  -4 -10   3  192.28   33.20
   4  10   3  208.78   32.60
  -4 -10   3  208.28   33.00
  -4  10  -3  196.08   32.70
   4  10   3  174.68   32.20
   4 -10  -3  195.08   31.90
  -4  10   4   79.59   17.40
   4  10  -4   71.99   16.90
  -4 -10  -4   95.79   17.50
  -4 -10  -4   80.79   17.10
   4 -10   4   59.49   17.60
   4  10  -4   69.19   16.30
  -4  10   4   47.70   17.20
   4 -10  -4   73.39   16.40
  -4  10  -4   89.09   18.20
  -4  10  -4   51.29   16.90
   4 -10  -4   68.59   19.20
   4  10   4   85.89   17.70
  -4 -10   4   82.19   18.40
   4 -10   5   15.40   13.40
   4  10  -5   33.80   12.20
  -4  10   5    6.00   13.40
   4  10  -5   15.00   16.20
  -4  10   5   15.30   10.60
  -4 -10  -5   30.10   12.50
   4  10   5   49.99   13.80
  -4  10  -5   50.99   13.70
   4 -10  -5   34.90   13.90
  -4  10  -5   34.40   11.00
   4 -10  -5   40.60   14.10
  -4 -10  -6  134.29   22.00
  -4 -10  -6  140.09   22.60
  -4  10   6   52.99   21.10
   4 -10   6  104.09   19.90
  -4  10   6   85.99   19.90
  -4  10   6  104.69   21.20
   4 -10  -6  106.19   22.30
   4 -10  -6  119.99   21.30
  -4  10  -6   67.09   20.50
   4  10   6   58.19   20.80
  -4  10  -6   72.79   21.10
   4 -10  -6  146.19   22.20
  -4  10   7    6.20   11.30
  -4 -10  -7    3.20    7.10
   4  10  -7   -6.90    9.20
  -4  10   7   -3.60    7.70
  -4 -10  -7    3.90    7.40
  -4  10   7   10.00    7.80
   4  10   7    0.70    9.00
   4 -10  -7    6.60    9.00
   4 -10  -7    4.40    7.80
   4 -10  -7   -1.70    6.80
  -4  10  -7   11.20    7.20
  -4  10  -7    7.30    6.40
   4  10   7    9.30    6.40
   5 -10   0  175.98   51.39
   5  10   0  299.77   48.10
   5  10   0  235.08   52.59
   5 -10   0  306.27   48.20
   5  10  -1   91.99   16.70
   5 -10   1  101.89   22.80
   5 -10   1   91.49   17.40
   5  10   1   93.59   16.90
   5 -10  -1   73.29   22.80
   5 -10  -1   68.19   16.90
   5  10   1  117.59   24.80
  -5 -10  -2  192.08   40.00
  -5  10   2  203.48   39.70
  -5 -10  -2  203.48   40.80
   5  10  -2  261.37   39.80
  -5 -10  -2  201.88   40.80
   5 -10   2  239.68   40.90
   5 -10   2  227.28   40.20
   5  10   2  271.17   40.40
  -5  10  -2  220.48   41.30
  -5  10  -2  219.28   41.90
  -5  10  -2  254.47   42.20
  -5 -10   2  226.18   40.80
   5 -10  -2  239.88   40.00
  -5 -10   2  240.88   41.30
  -5 -10  -3   57.29   14.90
  -5 -10  -3   64.99   15.30
   5  10  -3   48.20   13.20
  -5  10   3   64.99   14.20
   5 -10   3   88.89   16.10
   5  10  -3   52.79   15.30
   5 -10   3   74.39   15.00
   5 -10  -3   50.39   16.90
   5  10   3   46.60   14.50
   5  10   3   68.89   15.70
  -5  10  -3   49.90   15.00
  -5  10  -3   33.00   14.10
   5 -10  -3   70.99   15.00
  -5 -10   3   77.39   16.20
  -5 -10   3   71.39   15.50
   5  10  -4   -2.90    8.60
   5  10  -4   25.40   12.20
   5 -10   4    4.60   10.60
  -5 -10  -4   38.50   10.00
  -5  10   4   23.80    8.30
  -5  10   4   11.10   14.00
  -5 -10  -4   -3.40    7.50
   5  10   4    2.30    9.80
  -5  10  -4    4.80   10.50
  -5 -10   4    7.60    9.70
  -5  10  -4   13.00   10.60
   5 -10  -4   19.00   10.90
   5 -10  -4    4.00    9.10
  -5 -10   4   -2.00    5.50
  -5  10   5   46.10   12.30
  -5  10   5   45.50   15.40
   5 -10   5   38.90   14.40
  -5 -10  -5   43.90   13.80
   5  10  -5   70.39   16.40
  -5  10   5   22.80   14.60
   5  10  -5   42.10   12.30
   5 -10  -5   39.40   14.70
   5 -10  -5   28.50   15.20
   5  10   5   25.50   13.00
  -5  10  -5   46.40   14.30
  -5  10  -5   59.99   15.20
   5  10  -6   69.49   14.10
  -5  10   6   64.39   13.80
  -5 -10  -6   66.29   14.60
  -5  10   6   34.70   13.70
   5 -10   6   54.69   15.10
  -5  10   6   43.20   16.50
  -5 -10  -6   71.29   16.00
   5  10   6   58.89   14.20
  -5  10  -6   46.70   13.90
   5 -10  -6   25.90   14.90
  -5  10  -6   77.59   15.00
   5 -10  -6   47.60   16.40
  -5  10   7    9.30    7.50
  -5 -10  -7   24.00   10.10
  -5  10   7    9.90    7.70
  -5  10   7    0.10    7.60
   5  10  -7   17.30    7.10
  -5 -10  -7   13.00    7.10
   5  10   7    8.60    6.30
  -5  10  -7    7.30    8.70
   5 -10  -7   25.60    8.30
   5 -10  -7    4.60    9.40
  -5  10  -7    8.20   10.00
   5 -10  -7    7.60    9.50
  -6 -10   0  200.78   38.30
  -6 -10   0  226.88   38.50
  -6 -10   0  239.38   39.90
   6 -10   0  199.88   37.50
  -6 -10   0  183.08   38.40
   6  10   0  241.28   37.30
  -6  10   0  198.98   38.80
  -6 -10  -1   43.40   11.20
  -6 -10  -1   48.10   13.20
   6  10  -1   24.50    7.90
  -6 -10  -1   40.10   13.50
  -6  10   1   22.70    9.20
  -6 -10  -1   29.70    9.50
   6 -10   1   25.70   11.00
   6 -10   1   29.30    9.10
  -6  10  -1   24.90   13.70
  -6 -10   1   39.90   11.60
  -6  10  -1   27.50   10.90
  -6 -10   1   43.00   12.60
  -6  10  -1   35.80   10.80
   6 -10  -1   18.30    8.80
   6  10   1   26.90    8.20
  -6 -10   1   30.90   12.30
   6 -10   2  132.79   26.40
  -6 -10  -2  117.39   26.60
   6  10  -2  138.59   25.10
   6 -10   2  139.19   25.80
  -6 -10  -2  105.39   25.60
  -6  10   2  141.09   23.30
  -6 -10  -2  144.59   26.50
  -6 -10  -2  184.88   28.10
  -6  10   2  125.49   24.90
  -6 -10   2  162.48   28.40
  -6  10  -2  123.79   25.90
   6  10   2  166.98   26.00
   6 -10  -2  110.19   25.20
  -6  10  -2  103.39   28.00
  -6 -10   2  161.08   27.50
   6 -10  -2  104.89   26.50
  -6  10  -2  135.89   26.70
  -6 -10   2  174.38   27.50
   6  10  -3    2.50    6.00
   6 -10   3    5.40    9.00
   6 -10   3   11.90    7.90
   6  10  -3   -0.20    9.10
  -6 -10  -3   -1.10    8.40
  -6  10   3   -0.20    8.10
  -6  10  -3   12.40    9.10
  -6 -10   3   -5.60    8.40
   6  10   3    3.10    9.70
  -6  10  -3   14.10   10.20
  -6  10  -3    9.80   14.00
  -6 -10   3  -11.10    9.70
   6 -10  -3   10.60    7.60
   6  10   3   15.30   10.10
   6 -10  -3   -3.60   11.20
  -6 -10   3   -1.40    4.90
  -6 -10   3  -15.10    9.20
   6  10  -4   45.10   13.90
   6 -10   4   37.10   14.90
  -6  10   4   52.19   12.80
   6  10  -4   80.29   16.40
  -6  10   4   46.00   16.90
  -6 -10  -4   54.79   14.40
  -6 -10  -4   36.90   13.60
  -6  10   4   78.19   19.10
   6  10   4   56.29   15.20
  -6 -10   4   73.09   16.40
   6 -10  -4   89.19   17.90
  -6  10  -4   87.89   17.10
   6 -10  -4   73.09   16.20
  -6  10  -4   31.20   14.70
  -6  10   5   11.80   13.00
   6  10  -5    2.90    8.60
  -6 -10  -5   13.80   10.40
   6  10  -5   25.50   13.30
  -6  10   5   10.70    8.30
   6 -10   5   20.30   11.40
  -6  10   5  -30.40   12.00
   6 -10  -5   12.50   12.60
   6 -10  -5   33.50   13.90
  -6  10  -5   19.10   11.80
   6 -10  -5   -9.20   10.30
  -6  10  -5    1.80   11.60
   6  10   5   15.30   10.70
  -6  10   6   39.10   14.20
   6  10  -6   26.40    9.90
  -6  10   6   27.20   11.10
  -6 -10  -6   22.60   11.90
  -6  10   6   48.30    9.90
   6 -10   6   40.30   12.50
  -6 -10  -6   45.20   11.50
   6  10   6   20.50   11.60
   6 -10  -6   13.40   12.90
   6 -10  -6   26.80   12.60
  -6  10  -6   45.30   11.10
  -6  10  -6   36.80   13.00
  -6 -10  -7   16.40    7.40
  -6  10   7   13.80    7.40
   6  10  -7   17.90    8.20
  -6  10   7   15.50    7.60
  -6 -10  -7   14.10    6.30
   6 -10  -7   10.80    6.90
  -6  10  -7   19.60    9.00
   6 -10  -7   16.60    9.10
  -6  10  -7   11.40    8.30
   6 -10  -7    6.90    8.90
  -7 -10   0   55.19   13.20
  -7 -10   0   27.80   18.20
  -7 -10   0   76.09   15.60
  -7 -10   0   66.59   15.10
  -7  10   0   37.70   11.30
   7 -10   0   44.70   11.40
   7  10   0   52.19   11.30
  -7  10   0   33.80   15.30
  -7 -10  -1  172.18   30.50
   7 -10   1  131.59   26.30
   7 -10   1  143.69   27.90
   7  10  -1  161.58   26.20
  -7 -10  -1  218.88   30.30
  -7 -10  -1  144.59   27.80
  -7  10   1  141.79   26.20
  -7  10   1  122.09   24.70
  -7 -10  -1  151.58   27.70
  -7 -10   1  218.08   31.10
   7  10   1  145.09   26.30
  -7  10  -1  170.48   27.40
  -7 -10   1  147.49   28.60
  -7  10  -1  137.29   29.60
  -7 -10   1  123.39   27.20
  -7 -10   1  177.88   28.40
   7 -10  -1  186.48   27.00
  -7  10  -1  176.48   28.70
  -7  10   2   -7.40   10.70
   7  10  -2   -4.10    5.90
  -7  10   2    5.30    6.80
  -7 -10  -2   -0.60   10.90
  -7 -10  -2   16.30    9.20
  -7 -10  -2   28.30   10.00
   7 -10   2   15.00    8.20
  -7 -10   2   -2.70    7.60
  -7  10  -2   -3.70   13.10
  -7 -10   2    6.20    9.70
   7  10   2    2.30    7.30
  -7  10  -2   -4.30   10.10
  -7 -10   2   -1.40   11.30
  -7  10  -2    1.80    7.60
   7 -10  -2    3.90    6.40
  -7 -10   2   10.90   10.50
  -7 -10  -3   26.90   12.20
   7 -10   3   19.00   10.50
  -7  10   3   17.30    7.30
  -7  10   3   27.80   12.90
   7 -10   3   15.60    9.90
  -7 -10  -3   19.20   10.60
   7  10  -3   17.30    8.40
  -7  10  -3    5.80   14.40
  -7 -10   3   -2.80    8.70
  -7  10  -3    9.30    9.70
  -7 -10   3   10.50   12.00
   7  10   3   24.80   10.20
  -7 -10   3   21.50   10.90
   7  10   3   11.30   10.00
  -7 -10   3   11.10   10.90
   7 -10  -3   27.10   10.00
   7 -10  -3   23.20   12.60
  -7  10  -3   36.00   12.30
  -7  10   4   19.10    8.60
  -7  10   4   11.20   15.40
   7 -10   4   30.50   12.50
  -7 -10  -4   32.20   10.80
  -7 -10  -4   19.50   10.60
   7  10  -4   30.30   10.60
  -7 -10   4   28.60   12.80
  -7  10  -4   20.20   11.80
   7 -10  -4   20.20   11.10
   7 -10  -4   39.80   10.70
  -7  10  -4   41.10   11.10
   7  10   4   18.80   11.40
   7 -10   5    8.40    9.10
  -7  10   5   -8.80   14.20
  -7  10   5   34.10   14.80
  -7 -10  -5   29.40   12.20
   7  10  -5   15.30   11.90
  -7  10   5   29.10    5.30
  -7 -10  -5   30.30   11.40
   7  10  -5   21.10   11.40
   7 -10  -5   23.00   11.30
   7  10   5   -1.00   11.00
  -7  10  -5   19.70   12.40
  -7  10  -5   31.90   12.50
   7 -10  -5   18.80   11.60
   7 -10  -5   24.40   14.60
  -7 -10   5   26.90   10.70
  -7 -10  -6    4.20    6.50
  -7  10   6   15.50   11.60
   7  10  -6   17.10    8.50
  -7 -10  -6    0.60    9.60
   7 -10   6    4.40    9.40
  -7  10   6    1.30    8.80
   7 -10  -6   -4.00    8.70
  -7 -10   6    3.00    3.70
   7  10   6   -3.80    8.50
  -7  10  -6   21.50   10.90
   7 -10  -6   -5.70   10.00
  -7  10  -6   12.40    7.50
  -7 -10  -7    9.50    8.30
  -7  10   7   10.80    6.40
  -7 -10  -7    6.40    6.80
  -7  10  -7    4.40    7.10
   7 -10  -7    7.50    6.10
  -7  10  -7    3.70    7.40
   8  10   0   22.60    7.10
   8 -10   0    5.20    7.10
  -8 -10   0    4.70    8.70
  -8 -10   0    2.40    8.70
  -8 -10   0   -2.30    8.00
  -8 -10   0    3.60   10.80
  -8  10   0   -6.10   11.70
  -8 -10   0    2.50   15.20
   8  10  -1   14.60    6.70
  -8 -10  -1   25.80   11.50
  -8 -10  -1   16.30   10.10
  -8  10   1   18.50    4.00
  -8 -10  -1    2.60   16.00
   8 -10   1   -3.70    7.30
  -8 -10  -1   10.80    8.90
   8 -10  -1    1.40    7.40
  -8 -10   1   -6.80   11.70
  -8  10  -1   17.00   11.60
  -8 -10   1   13.60   10.60
  -8 -10   1   -9.40    9.40
  -8 -10   1   11.30   12.50
   8  10   1   24.40    7.20
  -8  10  -1   23.20   14.30
  -8  10  -1    7.00    7.80
  -8 -10  -2   67.59   14.20
   8  10  -2   33.00    9.90
   8 -10   2   40.10   11.60
  -8  10   2   39.80   15.50
  -8 -10  -2   55.39   15.50
  -8 -10  -2   33.70   13.50
  -8  10  -2   46.30   17.30
  -8  10  -2   45.40   14.30
   8  10   2   34.50   11.20
  -8 -10   2   50.89   15.40
  -8  10  -2   34.90   11.00
  -8 -10   2   40.60   12.10
  -8 -10   2   50.19   13.80
   8 -10  -2   20.50   10.90
  -8 -10  -3   46.10   15.60
   8 -10   3   72.69   16.20
  -8  10   3   35.10   18.40
   8 -10   3   69.09   15.00
  -8 -10  -3   86.99   17.20
   8  10  -3   45.10   12.90
  -8 -10   3   43.10   16.20
  -8  10  -3   34.60   18.70
   8  10   3   64.29   15.40
  -8  10  -3   84.49   17.90
   8 -10  -3   55.09   13.40
  -8  10  -3   73.79   16.30
   8  10   3   53.09   14.80
  -8  10   4   11.90   17.00
  -8 -10  -4   33.50   11.00
  -8 -10  -4   32.00   11.80
   8  10  -4   42.10   10.80
   8 -10   4    9.50   11.90
   8  10   4   24.50   12.80
  -8  10  -4   62.59   12.50
  -8 -10   4   10.20   11.30
   8  10   4   23.40   11.00
  -8 -10   4   30.40   13.30
  -8  10  -4   32.60   13.10
   8 -10  -4   26.40   10.00
  -8 -10  -5  254.77   38.00
  -8  10   5  220.18   37.60
   8 -10   5  179.08   36.10
  -8 -10  -5  220.78   36.40
   8  10   5  159.98   36.30
   8 -10  -5  236.58   37.70
  -8  10  -5  245.48   39.10
   8 -10  -5  178.28   37.80
  -8 -10   5  203.28   37.60
  -8  10  -5  231.68   37.40
   8 -10  -5  126.59   35.50
  -8 -10  -6    8.20    7.60
  -8  10   6    0.90   11.20
  -8 -10  -6   -4.10    7.40
   8 -10   6   -0.30    8.60
   8 -10  -6    1.90    7.60
  -8  10  -6   -1.70    6.50
  -8 -10   6    4.20    3.80
  -8  10  -6   -2.10    8.00
   8 -10  -6    4.80    7.00
  -9 -10   0   15.40   13.60
  -9 -10   0    5.60    9.20
  -9 -10   0  -20.70    8.70
  -9 -10   0    8.10   10.70
  -9 -10   0    2.00   11.60
   9  10   0    0.90    5.90
  -9  10   0    5.00   11.80
   9 -10   0   -5.20    7.30
  -9 -10  -1   23.40   11.00
   9  10  -1   14.30    7.10
   9 -10   1   -7.60    8.60
   9 -10   1   25.90    8.70
  -9 -10  -1   35.30   19.30
  -9 -10  -1   19.70   12.10
   9  10   1   18.50    7.80
   9 -10  -1   26.20    8.30
  -9  10  -1   16.70   12.10
  -9 -10   1   11.00   11.40
  -9  10  -1   18.50   14.50
  -9 -10   1   -8.90   10.60
  -9 -10   1   18.50   15.30
  -9 -10   1   38.50   13.90
  -9 -10  -2   27.60   12.50
  -9 -10  -2    0.70    9.40
   9 -10   2   28.60    9.60
  -9 -10  -2   12.50   11.90
   9  10  -2   15.80    7.20
  -9 -10   2   10.60   11.20
  -9 -10   2    4.50   11.20
  -9  10  -2   19.50    8.40
   9 -10  -2   21.20    9.20
  -9  10  -2   23.80   12.60
  -9  10  -2   -1.10   14.60
   9  10   2    0.00    8.40
  -9 -10   2    5.60   12.10
  -9 -10   2   12.30   12.50
   9 -10   3    7.00    8.30
   9  10  -3   17.70    8.30
   9 -10   3    9.60   10.50
  -9 -10  -3    0.50   10.20
  -9 -10  -3    8.50   12.20
  -9  10   3    9.90   15.20
   9  10   3   13.20    8.80
  -9 -10   3   18.10   11.50
   9 -10  -3   11.30    9.50
  -9  10  -3    8.60   10.50
   9  10   3   21.00   10.30
  -9 -10   3   14.00   12.90
  -9  10  -3   11.70   11.90
  -9  10  -3   12.40   16.00
  -9 -10  -4   20.80    8.20
   9 -10   4   47.80   12.70
  -9  10   4    2.20   11.70
   9  10  -4   18.60   10.00
   9  10   4   33.40   11.00
  -9  10  -4   16.60   11.90
   9 -10  -4    8.20    8.50
   9  10   4   26.80   10.00
  -9 -10   4   11.40    9.70
  -9 -10   4   10.90    8.80
  -9  10  -4   33.80   12.00
  -9 -10  -5   23.00    7.50
  -9  10   5   -9.10    9.10
  -9  10   5   -0.80    2.20
  -9 -10  -5    7.00    7.00
   9 -10   5    8.50    9.90
  -9  10  -5   11.10    8.60
  -9  10  -5   -3.50    9.70
  -9 -10   5    2.70    7.20
   9 -10  -5    4.10   10.90
  -9 -10   5    5.60    8.80
  -9  10   6   10.00    8.30
   9 -10   6   21.00    7.70
  -9 -10  -6   48.50    9.30
  -9  10  -6   41.90    9.10
  -9  10  -6   22.30    7.60
   9 -10  -6   17.90    8.90
  10  10   0   37.00   10.30
 -10 -10   0   33.80   15.10
 -10 -10   0   53.59   13.60
 -10 -10   0   41.10   24.80
 -10  10   0   41.20   16.20
  10 -10   0   48.10   12.10
  10  10  -1   45.50   10.20
 -10 -10  -1   46.60   22.40
  10 -10   1   43.70   11.10
 -10 -10  -1   48.30   14.20
 -10 -10  -1   41.20   14.80
 -10 -10   1   12.50   13.20
  10 -10  -1   37.70   10.60
 -10 -10   1   47.60   19.30
 -10 -10   1   27.50   13.90
 -10  10  -1   43.30   17.30
  10  10   1   43.50   10.20
 -10 -10  -2   36.10   14.30
  10 -10   2   16.70    8.20
 -10 -10  -2   26.00   11.00
  10  10  -2   36.90    8.90
  10 -10   2    7.90   10.20
 -10 -10   2   28.50   11.80
 -10  10  -2    2.80   12.60
 -10 -10   2   15.20   14.70
 -10  10  -2   16.00   15.70
  10  10   2   25.80    8.70
 -10 -10   2   15.80    9.60
  10 -10  -2   33.00    9.40
 -10 -10   2   11.70   13.90
  10  10  -3  123.09   22.30
  10 -10   3   92.69   23.60
 -10 -10  -3   90.19   24.10
  10 -10   3  147.09   24.20
 -10  10   3   94.39   25.60
 -10  10  -3   87.29   24.00
 -10  10  -3  130.59   26.10
  10  10   3  117.59   23.30
 -10 -10   3  108.29   25.30
  10  10   3  147.79   23.10
  10 -10  -3  141.89   23.20
 -10  10   4  -12.10   14.30
  10  10  -4   23.20    8.50
  10 -10   4   15.10    8.00
  10 -10  -4    7.60    8.00
 -10 -10   4   16.10   12.90
 -10  10  -4   10.70    8.80
 -10 -10   4   10.80    8.90
  10 -10   5   77.89   16.50
 -10  10   5   56.69   19.70
  10 -10  -5   47.70   17.20
 -10 -10   5   95.79   18.00
 -10  10  -5  114.39   18.10
 -10  10  -6   -1.50    4.80
  11  10   0   32.50    8.80
 -11 -10   0   59.19   27.30
 -11  10   0   21.50   14.40
 -11 -10   0   30.10   15.00
  11 -10   0   12.40    7.80
 -11 -10  -1  112.49   26.70
  11  10  -1  121.29   22.70
  11 -10   1  101.79   22.60
 -11 -10  -1  145.39   30.30
  11 -10  -1  141.29   23.50
 -11 -10   1  100.19   30.30
 -11  10  -1  112.29   27.70
 -11 -10   1  135.99   27.40
  11  10   1  120.29   23.10
 -11 -10  -2   29.40   13.40
  11 -10   2   12.60    9.00
  11  10  -2   25.40    7.60
  11 -10   2    1.20    9.20
 -11  10   2   -1.50    2.60
  11 -10  -2    9.40    7.70
 -11 -10   2   -0.40   16.10
 -11 -10   2    9.10   12.10
 -11  10  -2   -4.30   14.70
 -11 -10   2   28.30   13.50
  11  10   2    6.90    7.70
  11 -10   3   14.70   10.90
  11 -10   3   16.30    9.20
  11  10  -3    9.80    6.20
 -11 -10  -3    7.30   11.00
 -11  10  -3  -12.20    7.50
 -11  10  -3    1.50   11.30
  11  10   3   10.90    8.30
 -11 -10   3    0.30   14.10
 -11 -10   3   34.20   12.90
  11 -10  -3   12.70    7.30
 -11  10   4    4.20   13.20
  11 -10   4   13.60   11.00
 -11 -10   4   18.80   12.40
 -11 -10   4   11.50    9.60
 -11  10  -4   11.20   11.40
 -11  10   5   15.10    8.60
  11 -10   5   10.20    8.90
 -11 -10   5   -2.00    5.70
  11 -10  -5    6.80    5.70
 -11 -10   5  -14.30   11.40
 -11  10  -5   17.50    7.00
 -12 -10   0   14.70   10.40
  12 -10   0   20.30    8.60
 -12  10   0   -3.30   13.70
  12  10   0    1.50    6.80
 -12 -10   0   13.40   25.40
  12 -10   1   32.90   10.40
  12  10  -1   35.90    8.60
 -12 -10  -1   33.60   16.10
 -12 -10  -1   56.89   16.10
 -12 -10   1  -11.60   12.60
  12  10   1   29.10    9.70
  12 -10  -1   23.60    9.80
 -12 -10   1   14.50   16.10
 -12  10  -1  -29.60   13.40
 -12 -10   1   21.70   18.30
  12 -10   2   67.99   15.60
 -12 -10  -2   81.89   16.10
  12 -10   2   38.60   12.00
  12  10   2   53.09   14.00
 -12 -10   2   59.59   16.30
 -12 -10   2   55.89   17.30
 -12  10  -2   56.79   16.10
  12 -10  -2   38.50   12.50
 -12  10   3   -0.20    2.50
 -12 -10  -3   14.20   10.70
  12 -10   3    2.80    9.20
 -12 -10   3   26.80   12.50
 -12 -10   3    7.30   11.10
 -12  10   4    3.80    9.50
  12 -10   4    1.00    8.60
 -12  10   4    2.40    2.50
 -12 -10   4    1.30    7.20
 -12 -10   4   15.70   13.40
 -13 -10   0   17.90   19.60
 -13 -10   0   17.00   13.80
 -13 -10  -1   23.30   13.50
 -13 -10   1   18.20    9.90
 -13  10  -1   -2.70   13.60
 -13 -10   1   39.00   17.60
 -13 -10  -2   18.80    9.10
 -13 -10   2    5.50    7.60
 -13 -10   2   37.10   15.40
  13 -10   3    8.20    7.70
 -13 -10  -3    3.80    8.70
 -13  10   3   -2.30    3.10
 -13 -10   3    4.30   11.30
 -13 -10   3    7.10    9.80
  13 -10   4   24.20    6.70
 -13 -10   4   12.30    9.30
 -13 -10   4   10.20    5.80
 -14 -10   0    1.50   16.60
 -14 -10   0    0.10    7.50
 -14 -10  -1   45.10   11.30
 -14 -10   1   11.00   17.70
 -14 -10   1   24.00   12.30
 -14 -10  -2   13.20   10.40
 -14 -10   2   20.80   12.70
 -15 -10   0    1.50    9.10
   0 -11   0   14.80   10.70
   0 -11  -1 1438.06  244.28
   0 -11  -2   38.20   16.00
   0 -11   3  154.08   22.60
   0  11   3   96.09   21.10
   0  11   3  104.09   20.70
   0  11  -3   94.99   21.20
   0 -11  -3   85.09   21.00
   0 -11  -3   92.59   20.60
   0  11  -4   45.30   14.60
   0 -11   4   37.90   13.30
   0  11   4   21.60   11.60
   0 -11  -4   33.30   12.40
   0  11   4   30.90   13.30
   0 -11  -4   49.99   12.50
   0  11  -4   27.00   12.30
   0  11  -5   20.50   11.50
   0  11   5   -2.70    9.70
   0 -11  -5  -18.00   10.40
   0 -11   5   -4.90   11.40
   0 -11  -5    4.40   11.00
   0  11   5    6.40   11.60
   0  11  -5   -0.30   11.30
   0 -11  -6  115.99   22.40
   0 -11  -6   91.39   21.20
   0  11  -6   87.79   21.10
   0  11   6  119.29   20.60
   0  11   6   65.49   20.90
   0 -11  -7    3.10   10.70
   0 -11  -7    9.60    7.50
   0  11   7  -12.30    8.90
   0 -11  -7   -2.70    7.60
   0  11  -7   -5.50    9.00
   0  11   7  -14.00    6.20
   1  11   0    9.90   10.50
   1 -11   0    0.50   10.10
  -1 -11   0   -2.60    8.20
   1  11   0   10.50    6.20
  -1 -11  -1  351.16   71.59
   1 -11   1  372.26   70.79
   1  11  -1  423.56   68.49
   1 -11  -1  428.96   72.59
  -1 -11  -2  695.63  124.09
   1  11  -2  738.93  120.39
   1 -11  -2  657.33  124.09
  -1  11   3   -1.70    7.70
   1 -11   3   13.90    9.80
  -1 -11  -3   -3.40    8.80
  -1  11   3    2.10    9.50
  -1 -11  -3    6.30    7.10
  -1 -11  -3   -9.70    8.80
   1  11  -3   14.50    9.20
   1 -11  -3    3.40    9.40
  -1 -11   3   15.30    9.80
  -1  11  -3    2.70    8.80
   1  11   3   10.40    7.90
  -1  11  -3    4.50   10.40
   1 -11  -3   -1.90    8.30
   1  11   3   -7.90    9.10
   1  11  -4  178.08   31.30
  -1 -11  -4  176.38   30.90
  -1  11   4  142.09   30.60
  -1  11   4  146.89   29.90
   1 -11   4  176.98   31.50
  -1 -11  -4  151.68   30.00
   1  11   4  176.08   30.40
  -1  11  -4  175.68   31.20
   1  11   4  139.49   30.30
   1 -11  -4  155.88   30.70
  -1 -11   4  149.99   30.50
  -1  11  -4  158.78   30.30
   1 -11  -4  155.88   30.40
  -1  11   5   28.90   15.60
  -1 -11  -5   58.39   15.70
  -1  11   5   59.89   13.90
  -1 -11  -5   56.19   15.60
   1 -11   5   55.29   16.30
   1  11  -5   80.49   17.20
   1 -11  -5   74.69   16.90
   1  11   5   33.40   15.60
  -1  11  -5   91.29   17.70
  -1 -11   5   60.19   16.30
   1  11   5   62.99   15.30
   1 -11  -5   54.29   16.00
  -1  11  -5   40.10   15.60
  -1 -11  -6   76.89   15.10
  -1 -11  -6   48.30   16.00
   1  11  -6   72.29   16.90
   1 -11   6   43.30   14.60
  -1  11   6   49.60   16.40
  -1  11   6   66.49   16.20
   1  11   6   31.00   15.80
  -1  11  -6   68.09   17.50
   1 -11  -6   66.99   16.10
   1  11   6   40.90   15.80
  -1  11  -6   73.99   15.00
   1 -11  -6   49.80   16.90
  -1  11  -6   40.60   16.20
   1 -11  -6   68.79   16.90
  -1  11   7   31.40    9.50
  -1 -11  -7   16.10   11.10
  -1  11   7   30.70    9.80
  -1 -11  -7   31.10   11.40
  -1 -11  -7   28.10    9.40
  -1  11   7   25.40   10.40
   1  11  -7   22.10   10.70
   1  11   7   18.80   10.60
  -1  11  -7   19.50   10.90
  -1  11  -7    8.30   11.00
   1 -11  -7   32.40    9.50
   1  11   7    0.90    9.90
   1 -11  -7   14.50    9.10
  -2 -11   0  281.27   49.90
   2 -11   0  259.27   46.30
   2  11   0  280.87   50.19
   2 -11   0  268.67   50.59
   2  11   0  260.47   46.00
   2  11  -1  159.08   27.10
  -2 -11  -1  167.78   32.60
   2 -11   1  141.59   30.70
   2 -11  -1  130.19   32.10
   2  11   1  181.98   32.50
   2 -11  -1  157.48   27.70
   2  11   1  133.29   27.00
   2  11  -2  114.89   19.60
   2 -11  -2   85.29   19.30
   2 -11  -2   94.29   25.70
  -2  11   3   54.69   15.50
  -2 -11  -3   72.69   16.20
  -2  11   3   78.59   15.40
  -2 -11  -3   58.39   14.20
  -2 -11  -3   73.49   15.50
   2  11  -3   59.69   16.00
   2 -11   3   43.40   15.50
   2  11  -3   61.79   14.00
   2 -11   3   59.69   15.50
   2  11   3   73.49   16.00
  -2  11  -3   58.09   16.60
   2  11   3   57.69   14.30
  -2  11  -3   56.89   14.90
   2 -11  -3   57.39   15.50
  -2 -11   3   61.79   15.50
  -2  11   4   11.60   11.00
  -2  11   4   20.50   11.90
   2 -11   4  -10.90   10.70
  -2 -11  -4   -6.00    9.40
  -2 -11  -4    1.30    8.90
   2  11  -4    8.10    9.80
  -2 -11   4   -0.10    4.00
   2 -11  -4   16.60   10.90
  -2 -11   4   13.60   10.90
   2 -11  -4   13.90   10.70
  -2  11  -4    3.40    9.80
   2  11   4    7.70   10.10
  -2  11  -4   -0.50    9.50
  -2  11  -4   13.40    8.60
   2  11   4   13.30    9.70
   2  11  -5  175.08   32.80
  -2  11   5  102.39   31.70
   2 -11   5  149.09   32.60
  -2 -11  -5  230.28   33.60
  -2 -11  -5  169.98   32.30
  -2  11   5  211.28   32.80
   2 -11  -5  216.58   37.80
  -2 -11   5  159.38   33.50
   2 -11  -5  146.89   32.10
  -2  11  -5  112.29   31.80
   2  11   5  171.08   32.30
  -2  11  -5  238.28   34.60
   2  11   5  164.48   32.80
  -2  11  -5  201.18   33.00
  -2  11   6   42.70   15.40
   2 -11   6   39.40   14.30
  -2 -11  -6   28.30   14.10
   2  11  -6   23.90   14.60
  -2  11   6   35.70   14.30
  -2 -11  -6   85.39   15.00
  -2  11  -6   61.99   16.80
  -2  11  -6   63.99   15.00
   2 -11  -6   88.79   15.60
   2 -11  -6   47.40   16.40
  -2  11  -6   58.09   13.90
   2 -11  -6   69.29   14.40
   2  11   6   49.30   15.90
   2  11   6   67.29   14.50
  -2 -11  -7  -13.30   10.20
  -2  11   7   -9.10   10.40
  -2  11   7    9.10    8.90
  -2 -11  -7    0.10    7.10
  -2  11   7    0.50    7.40
   2  11  -7   -9.70    6.10
   2 -11  -7   -0.90    7.80
   2 -11  -7   -7.00    9.70
   2 -11  -7    8.10    7.70
   2  11   7    4.50    9.70
   2  11   7   -7.80    9.00
  -2  11  -7    7.80    9.80
  -2  11  -7   -1.90    8.20
  -2  11  -7    8.80    8.60
   3  11   0  447.86   75.29
   3 -11   0  391.16   79.19
   3 -11   0  426.26   75.39
   3  11   0  539.15   79.99
   3 -11   1    9.40   10.90
   3  11  -1    7.10    6.40
   3 -11   1    2.50    6.80
   3  11   1    3.90    6.40
   3  11   1    5.90   11.70
   3 -11  -1   -9.80    7.10
   3 -11  -1   10.50   13.30
  -3  11   2    4.20    7.30
   3 -11   2   10.90    8.60
   3  11  -2    5.90    6.80
  -3 -11  -2   15.60    8.10
  -3 -11   2   10.40    8.70
   3 -11  -2   13.50    8.60
   3  11   2   27.30   12.50
   3  11   2   19.20    8.20
   3  11   2    4.10   12.90
  -3  11  -2   -6.90    8.70
   3  11  -3  245.08   39.60
  -3  11   3  180.88   38.20
  -3 -11  -3  208.78   38.70
   3  11  -3  248.38   38.70
   3 -11   3  217.78   39.30
  -3 -11  -3  203.58   38.50
  -3  11   3  222.48   39.20
  -3 -11  -3  201.08   38.50
  -3  11  -3  209.08   38.70
   3 -11  -3  220.48   39.20
   3  11   3  185.68   38.60
   3 -11  -3  228.38   39.50
  -3  11  -3  203.48   39.10
  -3  11  -3  238.08   39.40
  -3 -11   3  233.18   39.50
  -3  11   4  170.58   30.20
  -3  11   4  136.69   28.10
   3  11  -4  153.58   30.50
   3  11  -4  163.48   29.00
   3 -11   4  189.88   30.50
  -3  11   4  153.58   25.30
  -3 -11  -4  151.98   28.80
  -3 -11  -4  141.99   28.80
  -3 -11  -4  118.69   28.70
   3 -11  -4  140.99   29.50
  -3  11  -4  151.38   29.50
   3  11   4  128.69   28.90
  -3 -11   4  138.09   29.10
   3 -11  -4  170.48   31.10
  -3  11  -4  143.09   28.70
   3  11   4  141.29   28.80
  -3  11  -4  133.99   29.10
  -3 -11  -5  376.76   62.59
  -3  11   5  331.77   61.79
  -3  11   5  367.56   62.59
   3 -11   5  366.06   62.89
  -3 -11  -5  345.87   62.19
   3  11  -5  327.97   63.49
   3  11   5  320.17   62.59
  -3  11  -5  360.06   62.69
   3 -11  -5  359.76   63.09
  -3  11  -5  365.96   62.09
  -3  11  -5  330.47   62.39
   3  11   5  369.76   61.89
   3 -11  -5  366.06   63.39
   3 -11   6   43.20   11.40
  -3  11   6   32.70   12.40
  -3  11   6   40.20   15.10
  -3 -11  -6   52.09   14.50
  -3  11   6   26.10   14.20
   3  11  -6   39.90   14.30
  -3  11  -6   39.40   14.60
   3 -11  -6   40.90   14.30
  -3  11  -6   34.00   13.50
   3  11   6   32.40   13.10
   3 -11  -6   33.20   12.10
  -3  11  -6   41.50   13.50
   3  11   6   47.70   12.50
   3 -11  -6   41.20   14.70
   3  11  -7   -0.20    9.00
  -3  11   7   -9.30    6.50
  -3  11   7  -11.60   10.10
  -3  11   7   -3.90    7.10
  -3 -11  -7    1.00    6.80
  -3 -11  -7    9.90    9.90
  -3  11  -7    8.30    8.00
   3 -11  -7   -0.80    7.00
   3 -11  -7   20.60   11.00
  -3  11  -7    4.80    6.70
   3 -11  -7   11.60    6.60
   3  11   7    6.40    8.90
   3  11   7   -8.60    8.80
   4  11   0   35.90    9.70
   4  11   0   29.60   14.80
   4 -11   0   48.10   10.90
   4 -11   0   60.29   17.60
   4 -11   1   40.60    9.30
   4 -11   1   22.40   15.10
   4  11  -1   26.70    9.10
   4 -11  -1   39.10   10.30
   4  11   1   42.50    9.70
   4 -11  -1   24.60   16.10
   4  11   1   45.20   16.20
   4 -11   2  219.88   40.00
  -4  11   2  189.58   39.90
   4  11  -2  227.08   41.50
   4 -11   2  257.17   40.70
  -4 -11  -2  186.28   40.20
   4  11  -2  248.98   39.70
  -4 -11  -2  208.48   41.10
  -4  11  -2  226.78   40.40
  -4  11  -2  231.28   40.40
   4  11   2  229.98   40.20
  -4 -11   2  244.78   41.70
   4 -11  -2  251.57   41.80
   4 -11  -2  231.38   39.80
   4  11   2  251.57   48.70
  -4 -11   2  209.88   40.40
  -4 -11  -3  137.39   25.60
  -4  11   3  148.79   26.00
   4  11  -3  110.79   26.10
   4  11  -3  110.19   24.50
  -4  11   3  140.89   29.20
   4 -11   3  147.19   26.80
  -4 -11  -3  119.49   25.70
  -4  11  -3  137.89   27.10
   4 -11  -3  156.28   26.50
  -4 -11   3  140.19   27.20
   4  11   3  147.79   27.00
   4 -11  -3  180.08   28.60
  -4 -11   3  112.59   25.60
  -4  11  -3  137.89   26.00
  -4 -11  -4   26.50   11.80
   4  11  -4   64.29   13.30
  -4 -11  -4   62.79   12.50
  -4  11   4   32.60   13.70
   4  11  -4   56.79   15.40
  -4  11   4   35.00   12.00
   4 -11   4   68.99   14.90
   4 -11  -4   37.50   14.30
   4  11   4   64.79   14.70
  -4 -11   4   22.50   13.20
  -4  11  -4   23.40   13.10
   4 -11  -4   14.70   12.50
  -4  11  -4   29.40   14.60
  -4 -11  -5  129.39   30.20
   4  11  -5  144.89   31.00
  -4  11   5  166.68   26.80
  -4  11   5  165.98   30.90
  -4  11  -5  133.79   30.20
   4 -11  -5  178.68   32.30
   4 -11  -5  103.89   30.50
   4  11   5  197.28   30.40
  -4  11  -5  125.39   30.50
  -4 -11  -6  161.18   27.70
  -4  11   6  132.69   26.10
  -4  11   6  116.19   27.40
  -4  11   6  135.79   28.00
   4 -11   6  139.89   26.30
  -4  11  -6  166.98   28.60
   4  11   6  118.29   27.20
   4 -11  -6  118.89   27.10
   4 -11  -6  102.19   26.90
   4 -11  -6  135.19   27.70
  -4  11  -6  179.18   27.30
  -4  11   7   26.80   13.20
  -4  11   7   63.39   12.10
  -4 -11  -7   45.00   10.90
  -4  11   7   44.70   11.00
   4  11  -7   56.69   12.70
  -4 -11  -7   41.50   12.80
   4 -11  -7   28.70   11.10
   4  11   7   32.90   12.10
   4 -11  -7   51.09   11.60
  -4  11  -7   37.20   12.80
  -4  11  -7   34.70   11.40
   4 -11  -7   62.89   12.10
   5  11   0   67.39   14.50
   5 -11   0   67.89   15.20
  -5 -11   0   80.29   16.20
  -5 -11   0   74.09   18.00
  -5 -11   0   66.49   16.20
  -5  11   0   83.29   15.50
  -5 -11  -1   27.50   10.40
  -5 -11  -1   43.70   10.70
   5 -11   1   53.69   12.90
  -5  11   1   31.20    8.80
  -5 -11  -1   27.00    9.10
  -5 -11  -1   23.00   11.60
   5 -11   1   36.90    9.70
   5  11  -1   21.20    8.30
   5 -11  -1   12.90   10.50
   5 -11  -1   22.20    9.30
  -5  11  -1   33.80    9.40
   5  11   1   31.20    8.60
   5  11   1   37.30   15.20
  -5 -11   1   19.90    9.80
  -5  11  -1   30.20   11.60
  -5 -11   1   15.20   11.10
   5  11  -2   98.19   21.70
  -5 -11  -2  102.09   22.40
  -5  11   2  109.39   22.40
   5 -11   2  115.19   22.80
  -5 -11  -2  165.28   25.30
   5  11  -2  112.39   22.70
   5 -11   2  123.39   22.60
  -5 -11  -2  147.99   23.80
  -5 -11   2  114.49   23.70
  -5  11  -2  102.29   22.90
   5 -11  -2   97.39   23.60
   5  11   2  117.99   22.60
  -5 -11   2  140.29   24.50
  -5  11  -2  107.59   22.60
   5 -11  -2  130.39   22.90
  -5  11   3   21.20    9.40
   5 -11   3   17.10   10.00
   5  11  -3   10.80    6.80
  -5 -11  -3   17.40    9.60
   5  11  -3   19.80    9.80
  -5 -11   3   10.50   11.10
   5 -11  -3   -5.00    7.70
   5  11   3    9.80   10.30
  -5 -11   3   -5.40    7.90
  -5  11  -3   15.50   11.70
   5  11   3   11.00   10.00
  -5  11  -3   22.40    9.90
   5 -11  -3   19.90   12.20
  -5 -11   3    1.30    5.70
   5  11  -4   33.40   10.50
  -5  11   4   24.00   10.40
   5  11  -4   33.60   12.90
   5 -11   4   28.30   13.30
  -5 -11  -4   13.80   10.70
  -5  11   4   26.30   15.30
  -5 -11  -4   22.60   10.80
   5 -11  -4   55.09   13.50
   5  11   4   46.60   13.40
  -5 -11   4   46.20   13.20
   5 -11  -4   53.39   14.10
  -5  11  -4   25.50   12.10
  -5  11  -4   56.39   13.80
  -5  11   5   -6.40    7.70
  -5  11   5    1.10    8.70
   5  11  -5   -0.60    9.90
  -5  11   5  -10.40   12.00
   5  11  -5    8.10   12.30
   5 -11   5   -0.90   11.10
  -5 -11  -5   13.80   10.10
  -5  11  -5   -9.00    9.70
  -5  11  -5  -15.20   10.70
   5 -11  -5    1.10   10.90
  -5 -11   5   -4.10    4.30
   5 -11  -5    9.70   12.50
   5  11   5    4.70   10.70
  -5  11   6   -1.00    8.10
  -5 -11  -6   -0.50   10.60
  -5 -11  -6   10.00   10.50
  -5  11   6    1.10   12.40
  -5  11   6  -12.80   11.10
   5  11  -6   11.60    7.40
   5 -11   6  -17.70    9.30
   5 -11  -6    0.90   11.40
   5 -11  -6   -5.00   10.50
   5  11   6   -9.00    6.70
   5 -11  -6   -9.40   11.90
  -5  11  -6   -1.30   11.00
  -5  11  -6    2.50   10.20
  -5  11   7    0.60    9.40
   5  11  -7   -1.50    5.20
  -5 -11  -7    1.10    5.90
  -5 -11  -7   16.10    6.90
  -5  11   7    6.00    7.00
  -5  11   7    5.80    6.50
  -5  11  -7    9.10    6.20
   5 -11  -7   15.90    8.20
   5 -11  -7  -11.50    6.20
   5  11   7    4.20    5.40
   5 -11  -7    4.10    8.80
  -5  11  -7   15.80    6.90
   6 -11   0   51.89   11.40
  -6  11   0   44.00   11.20
  -6 -11   0   59.69   14.30
  -6 -11   0   31.80   12.10
   6  11   0   43.70   10.40
  -6 -11   0   45.30   15.00
  -6 -11   0   37.40   11.70
   6  11   0   48.10   13.80
   6  11  -1   14.80    6.70
  -6 -11  -1   14.50    7.70
  -6 -11  -1    5.10   10.70
  -6  11   1    3.00    7.60
   6 -11   1    9.80    8.00
  -6 -11  -1   -1.60    8.70
   6 -11   1   14.10    7.80
  -6 -11  -1   16.30    9.70
  -6 -11   1   36.60   13.80
  -6 -11   1   -7.10    6.20
  -6  11  -1   26.20    9.90
  -6  11  -1   15.40    9.60
  -6 -11   1   18.60   10.80
   6 -11  -1    8.60    7.70
  -6  11  -1  -18.50   12.10
  -6 -11   1   12.20    8.60
   6  11   1    2.00    6.20
   6  11   1    5.60    8.60
   6 -11  -1   -0.10    9.50
  -6 -11   1   14.40    9.60
  -6 -11  -2   20.50    9.70
  -6 -11  -2   21.90    8.90
  -6  11   2   11.20    7.90
   6 -11   2   12.00    7.00
   6  11  -2   13.00    7.20
   6 -11   2   10.00    9.00
  -6 -11  -2   14.10    9.20
   6  11  -2   43.00   12.70
  -6 -11   2    8.20    7.10
  -6  11  -2   12.70    9.90
   6 -11  -2   15.70   10.30
  -6  11  -2   13.30   10.50
  -6 -11   2   17.30   10.80
  -6 -11   2   -3.60    6.70
   6 -11  -2    0.10    8.50
  -6  11  -2   19.80   14.00
  -6 -11   2    8.40   10.80
   6  11   2   19.10    8.90
  -6  11   3    8.50    8.80
   6  11  -3   -1.90   11.40
  -6 -11  -3   -3.10    8.90
   6 -11   3    8.40    9.90
   6 -11   3    0.50    9.70
   6  11  -3    4.80    7.60
   6  11   3  -10.80    9.40
   6 -11  -3    1.10    9.90
  -6 -11   3    2.80    9.50
  -6 -11   3    0.70   10.50
  -6  11  -3   -8.00    9.60
  -6 -11   3   -5.10    9.70
   6 -11  -3  -10.90    9.00
  -6 -11   3   -5.00    6.90
  -6  11  -3   13.80    9.70
   6  11   3    4.20   10.00
   6 -11   4  -13.10   11.30
   6  11  -4   13.80   10.10
  -6  11   4    4.30   12.60
  -6 -11  -4   -7.70    8.20
  -6 -11  -4   -4.90    7.80
  -6  11   4   -2.40    7.40
   6  11  -4   -3.10    9.20
   6 -11  -4   -1.10    9.70
  -6  11  -4   11.70   11.00
   6  11   4  -15.10    9.40
   6 -11  -4   16.80   11.60
  -6  11  -4    0.70   10.10
  -6 -11   4   -7.30    6.40
  -6  11   5   18.00   10.60
  -6  11   5   22.20   13.00
  -6  11   5   33.10   14.40
  -6 -11  -5   22.40   10.80
   6  11  -5   16.00   10.40
   6  11  -5   10.70   10.40
   6 -11   5   33.30    9.80
   6 -11  -5   34.30   13.90
   6  11   5   34.70   12.10
   6 -11  -5   25.70   12.20
  -6 -11   5    7.30    6.50
  -6  11  -5   -2.10   11.50
  -6  11  -5   25.90    9.60
   6 -11   6   17.10   10.30
  -6  11   6   12.50   12.00
  -6 -11  -6   29.80   11.00
   6  11  -6   17.60    7.70
  -6  11   6   16.80   12.20
  -6  11   6   24.90    9.20
  -6 -11  -6   21.50   11.70
  -6  11  -6   39.40   12.30
  -6  11  -6   13.30    8.40
   6  11   6    6.20   10.00
   6 -11  -6   15.90   10.50
   6 -11  -6   25.90    9.40
  -6  11   7  -21.80    7.50
  -6 -11  -7    8.20    6.10
  -6 -11  -7    2.50    5.20
  -6  11   7    1.60    6.30
   6  11  -7    1.00    7.10
  -6  11  -7    2.50    7.40
   6 -11  -7    7.50    8.40
   6 -11  -7   -2.50    5.30
   6 -11  -7   -2.90    5.20
  -6  11  -7   23.20    6.10
  -7 -11   0   87.79   19.10
  -7  11   0   81.19   23.40
  -7 -11   0  111.19   20.70
   7  11   0   94.49   17.40
  -7 -11   0   69.89   18.70
   7 -11   0   97.69   18.10
  -7  11   0   81.49   17.70
  -7 -11   0   83.99   21.70
  -7 -11  -1   31.30   12.40
  -7  11   1   58.09    9.10
  -7  11   1   33.90   11.10
  -7 -11  -1   38.50   14.00
  -7 -11  -1   39.60   13.20
   7 -11   1   22.90   11.40
  -7 -11  -1   52.49   16.40
   7  11  -1   46.70   11.80
   7 -11   1   53.49   12.50
   7 -11  -1   46.60   11.90
  -7 -11   1   41.90   12.60
  -7 -11   1   42.50   14.80
   7  11   1   43.70   11.00
  -7 -11   1   41.50   13.50
  -7  11  -1    6.90   15.30
   7 -11  -1   22.80   13.60
   7  11   1   30.90   12.80
  -7 -11   1   49.99   15.30
  -7  11  -1   43.20   12.50
  -7  11  -1   28.70   13.10
  -7 -11  -2    6.50   11.60
  -7  11   2   19.10    7.70
  -7 -11  -2   -1.40    9.40
   7 -11   2    2.10    8.30
  -7  11   2    5.50   11.30
   7 -11   2    7.00    8.90
   7  11  -2    3.00    7.20
   7 -11  -2   11.90    8.40
   7 -11  -2    6.60   10.10
  -7 -11   2    4.40   10.50
  -7 -11   2   -9.10   10.00
  -7  11  -2   22.90   14.60
  -7 -11   2   -7.50   10.90
  -7  11  -2    5.60   10.30
   7  11   2   11.00    8.90
  -7 -11   2   -2.60    8.40
  -7  11  -2   28.10   11.30
  -7  11   3   20.00   14.50
   7 -11   3   20.00   11.30
  -7 -11  -3   30.70   11.40
  -7  11   3   43.30   10.50
   7 -11   3   42.60   12.50
  -7 -11  -3   56.99   13.40
   7  11  -3   36.90   10.30
   7  11   3   49.10   12.30
   7  11   3   34.10   12.60
  -7 -11   3    6.80   10.20
  -7 -11   3   38.40   16.30
   7 -11  -3   15.70   13.30
  -7  11  -3   38.90   13.10
  -7 -11   3   19.80   12.10
   7 -11  -3   53.39   12.30
  -7 -11   3   23.10   11.90
  -7  11  -3   35.20   11.80
  -7 -11  -4   43.00   18.30
   7 -11   4   85.29   19.90
   7  11  -4   57.49   18.80
  -7 -11  -4   84.19   18.80
   7  11  -4  114.69   19.50
  -7  11   4   65.59   21.60
  -7  11   4   95.79   18.70
   7 -11  -4  149.88   22.60
  -7  11  -4   83.29   19.70
  -7  11  -4  146.49   21.70
  -7 -11   4   93.69   21.00
   7  11   4  118.19   20.90
   7 -11  -4   81.59   19.00
  -7 -11  -5    5.90    9.50
   7 -11   5   -3.70   10.00
   7  11  -5    0.80    9.20
  -7 -11  -5   -3.80    9.30
   7  11  -5    3.60    9.10
  -7  11   5    3.50    9.90
   7 -11  -5   11.50   10.20
   7  11   5   -8.80   10.00
  -7  11  -5   -8.30   10.50
   7 -11  -5   16.50   12.60
  -7 -11   5  -10.10    5.10
  -7  11  -5   12.40   11.10
   7 -11  -5   17.70   10.50
  -7 -11  -6   26.80   10.80
   7  11  -6   25.80    8.80
  -7  11   6   14.50   12.00
  -7  11   6   23.60   10.80
  -7 -11  -6   54.29   10.80
   7 -11   6   22.00    9.00
   7 -11  -6   33.40   10.50
  -7 -11   6   43.60    8.10
   7  11   6   22.40   10.60
   7 -11  -6   18.10   10.70
  -7  11  -6   34.40   12.00
  -7  11  -6   36.40   10.50
  -8 -11   0   46.50   18.10
   8  11   0   29.20    9.00
  -8 -11   0   41.60   14.40
  -8 -11   0   45.30   12.40
   8 -11   0   29.00    9.90
  -8  11   0   10.00   13.20
  -8 -11   0   36.20   11.50
  -8  11   0   24.30    9.10
  -8 -11  -1  -27.80   13.90
  -8  11   1    5.20    3.50
   8 -11   1   -9.60    7.40
  -8 -11  -1    1.10    8.90
  -8 -11  -1   -2.90   10.60
  -8 -11  -1    2.50    9.80
   8  11  -1   -0.50    6.80
   8 -11   1   14.20    8.60
  -8 -11   1   -6.40   11.40
   8  11   1   -4.60    6.70
  -8  11  -1   10.80    9.90
  -8  11  -1   -9.10   13.00
  -8 -11   1   14.90   14.00
  -8 -11   1    9.20   16.50
  -8 -11   1    7.30   10.50
  -8 -11   1   -1.10    6.50
   8 -11  -1   -2.80    7.40
  -8  11  -1    3.00    6.60
   8  11  -2   26.80    9.20
  -8  11   2   34.60   16.60
   8 -11   2   28.00    9.40
   8 -11   2   25.60   11.10
  -8 -11  -2   55.19   13.30
  -8 -11  -2   29.10   12.20
  -8  11  -2   24.00   12.00
  -8 -11   2   47.20   12.90
   8  11   2   42.10   10.80
  -8 -11   2    8.30    8.30
   8 -11  -2   35.30   10.40
  -8  11  -2   36.20   16.20
  -8 -11   2   24.50   12.70
  -8 -11   2   66.99   18.00
  -8  11  -2   32.30   11.30
   8 -11   3  173.98   32.10
  -8  11   3   95.99   33.30
  -8 -11  -3  165.38   32.70
  -8 -11  -3  171.48   32.80
   8 -11   3  189.68   32.70
   8  11  -3  190.78   31.00
  -8  11  -3  232.28   34.80
   8 -11  -3  152.68   31.30
  -8 -11   3  142.59   31.90
   8  11   3  211.98   33.10
  -8 -11   3  208.78   34.10
   8  11   3  147.39   31.00
  -8 -11   3  210.78   35.20
  -8  11  -3  124.09   30.90
  -8 -11  -4   20.90   10.40
  -8  11   4  -24.70   14.80
   8  11  -4   37.50   10.90
   8 -11   4   -2.90   10.60
  -8 -11   4    0.80    7.50
   8 -11  -4    9.00   10.00
   8 -11  -4   16.60    9.50
  -8  11  -4   22.90   10.90
   8  11   4   -2.20    9.80
  -8  11  -4   39.80   10.30
  -8 -11   4   34.20   13.20
  -8  11   5    8.50   13.90
  -8 -11  -5   19.80   10.10
   8 -11   5   16.20   10.40
  -8 -11  -5   13.60    8.60
  -8  11  -5    1.60   10.00
   8  11   5   16.80   10.20
   8 -11  -5   13.50   12.20
  -8 -11   5   -1.40    6.30
  -8 -11   5   11.30    9.30
   8 -11  -5   18.30    9.70
  -8  11  -5   17.50   11.50
  -8  11   6   23.50    9.60
  -8 -11  -6   52.39   12.20
  -8 -11  -6   41.20    9.50
   8 -11   6   34.10    8.70
   8 -11  -6   41.00   11.00
  -8 -11   6   26.30    6.40
   8 -11  -6   40.30   10.20
  -8  11  -6   21.80   10.30
  -8  11  -6   59.79   11.10
  -9 -11   0  343.07   65.29
  -9 -11   0  368.36   68.69
   9 -11   0  399.56   64.19
  -9 -11   0  351.26   65.39
   9  11   0  401.06   64.09
  -9 -11   0  354.46   65.59
  -9 -11  -1   14.90   12.70
  -9 -11  -1  -14.50   16.10
   9  11  -1    2.80    7.50
  -9  11   1   -0.10    3.70
  -9 -11  -1   -1.10   10.00
   9 -11   1   -1.70    8.40
  -9 -11   1   18.70   11.40
  -9 -11   1   16.20   11.40
   9  11   1   -3.00    7.20
   9 -11  -1   21.40    8.60
  -9 -11   1   -4.20   11.60
  -9  11  -1    1.40   13.20
  -9 -11   1   13.20   16.70
  -9 -11  -2  -13.80   10.70
  -9 -11  -2   -2.60   10.20
   9 -11   2    8.40    9.40
  -9  11   2    1.10    2.70
   9  11  -2    4.10    7.50
   9 -11   2    3.20    7.40
  -9  11  -2    0.20   11.40
   9 -11  -2    0.10    6.70
  -9  11  -2    3.20    8.50
  -9 -11   2  -13.10   11.20
  -9  11  -2   -0.60   14.70
  -9 -11   2   12.50   11.50
  -9 -11   2  -10.20   10.40
  -9 -11   2   -8.30   12.90
   9  11   2   12.90    9.20
   9 -11   3   14.80    9.10
  -9 -11  -3   28.30   11.50
   9 -11   3   25.30   11.90
   9  11  -3   20.40    9.50
  -9 -11  -3   34.50   10.70
  -9  11   3   -2.70   14.60
  -9 -11   3   -0.10   11.50
   9  11   3    4.40   10.60
  -9  11  -3   23.40   10.20
   9 -11  -3   44.90   10.90
  -9  11  -3   15.60    9.00
   9  11   3   11.50   10.90
  -9 -11   3   22.60   14.00
   9  11  -4   40.20   10.40
  -9  11   4   37.40   13.30
  -9 -11  -4   46.70   11.00
   9 -11   4   32.60   13.10
  -9  11  -4   38.90   11.10
  -9  11  -4   31.60   13.40
   9  11   4   54.39   12.90
  -9 -11   4   28.20   15.00
  -9 -11   4   21.90   12.80
   9 -11  -4   18.80   10.50
  -9 -11  -5   42.30    9.40
  -9  11   5   26.80   10.40
   9 -11   5    6.80   10.50
  -9 -11   5   10.70    7.20
   9 -11  -5   26.20    9.70
  -9  11  -5   54.39    9.90
  -9 -11   5   23.20   13.60
  -9  11  -5   32.50    9.80
   9 -11   6   -0.40    7.70
  -9  11   6    8.50    7.30
   9 -11  -6   10.20    9.30
   9 -11  -6    7.80    5.70
  -9  11  -6   20.10   11.10
  -9  11  -6    8.70    6.40
  10  11   0   37.60    9.60
 -10 -11   0   53.59   24.50
 -10 -11   0   16.50   11.60
 -10  11   0   27.10   17.80
 -10 -11   0   26.00   14.80
  10 -11   0   41.70   11.10
  10 -11   1  213.98   40.50
 -10 -11  -1  247.58   41.60
 -10 -11  -1  311.27   46.30
 -10 -11  -1  204.88   41.90
  10  11  -1  248.08   40.50
  10  11   1  252.87   40.80
 -10 -11   1  240.08   42.50
 -10 -11   1  241.68   44.10
  10 -11  -1  220.98   41.00
 -10 -11   1  184.28   41.80
 -10  11  -1  164.98   43.00
 -10 -11  -2   34.40   14.30
 -10 -11  -2   55.29   15.20
  10 -11   2   46.70   12.80
  10 -11   2   30.60   11.70
  10  11  -2   25.70   10.30
 -10  11  -2    9.20   16.20
  10  11   2   55.99   12.50
 -10 -11   2   23.10   14.10
 -10 -11   2   74.89   19.00
 -10 -11   2   13.90   13.70
 -10 -11   2   36.60   13.10
  10 -11  -2   37.80   11.40
 -10  11  -2   48.30   15.10
  10 -11   3   14.40   11.70
 -10 -11  -3   31.60   12.30
  10 -11   3   26.30   12.00
  10  11  -3   30.80    8.80
 -10  11   3    1.20   14.10
 -10  11  -3   29.70   13.20
  10  11   3   10.30   10.80
  10 -11  -3   21.00    8.70
  10  11   3   20.20    9.30
 -10 -11   3   24.20   13.00
 -10 -11   3   27.60   11.90
  10 -11   4   -2.70   10.10
 -10  11   4    3.10   14.50
 -10  11  -4   20.40   11.50
 -10 -11   4   11.60   14.10
 -10 -11   4   19.80   12.10
  10  11   4   15.40    9.20
  10 -11   5    6.80    9.20
 -10  11   5    0.80    2.20
 -10  11   5    4.90   12.30
 -10  11  -5    4.40    6.40
 -10 -11   5    4.10    5.60
  10 -11  -5    9.30    9.50
 -10 -11   5    6.10    8.80
 -11 -11   0  114.39   27.00
 -11 -11   0  159.88   30.70
  11 -11   0   96.09   23.40
  11  11   0  158.08   24.30
  11  11  -1   93.29   15.60
 -11 -11  -1   54.19   17.80
 -11 -11  -1  102.89   21.20
  11 -11   1   67.49   15.20
 -11 -11   1   37.40   17.90
 -11 -11   1   82.39   27.30
  11 -11  -1   68.09   15.20
 -11  11  -1   59.39   20.60
  11  11   1   73.09   14.70
 -11 -11  -2   15.60   13.10
  11 -11   2   15.70    7.30
  11  11  -2   19.40    9.10
  11 -11   2   17.20   10.20
  11 -11  -2    4.80    7.20
 -11 -11   2   30.20   14.50
 -11 -11   2   15.40   12.20
 -11  11  -2   -3.30   14.40
 -11 -11   2   24.10   13.50
  11  11   2   15.60    9.80
  11 -11   3    5.60   10.10
 -11 -11  -3    7.90   10.30
 -11  11  -3  -16.50   10.40
  11  11   3   10.40    6.60
 -11 -11   3   21.50   12.20
 -11 -11   3    8.40    9.00
 -11  11   4   11.50    9.10
  11 -11   4   31.80    9.20
 -11 -11   4   13.80   14.70
 -11 -11   4   25.50   11.50
 -11  11  -4   10.60   10.80
  11 -11   5   14.00    6.60
 -11  11   5   12.60    7.50
  11 -11   5   23.60    7.20
  11 -11  -5    0.10    8.40
 -11 -11   5    4.30    4.30
 -11  11  -5   15.00    6.50
 -11 -11   5   10.30   11.10
 -12 -11   0   79.89   25.50
 -12 -11   0  158.18   32.30
  12  11   0  138.09   22.80
  12 -11   0  110.89   23.00
 -12 -11  -1   47.30   17.60
 -12 -11  -1   82.49   19.30
  12 -11   1   69.69   14.80
  12  11  -1   54.59   13.20
  12  11   1   64.79   14.30
 -12 -11   1   58.19   16.20
  12 -11  -1   40.80   14.00
 -12 -11   1   82.99   21.80
 -12  11   2   -3.40    2.40
 -12 -11  -2    0.60   11.80
 -12 -11   2   18.80   20.50
 -12 -11   2   -0.90   10.70
 -12 -11   2    7.40   11.80
  12  11   2    0.00    8.30
  12 -11   3   -3.50    8.40
 -12  11   3   -2.90    3.30
 -12 -11  -3    1.90    9.00
 -12 -11   3   23.90   17.10
 -12 -11   3    5.90    8.10
  12 -11   4   21.80    7.70
  12 -11  -4   15.10    9.60
 -12 -11   4   25.70   11.30
  13 -11   0   12.10   10.90
 -13 -11   0   18.70   10.60
 -13 -11   0    2.20   15.50
 -13 -11  -1    5.20    9.10
 -13 -11   1   11.90    8.90
 -13 -11   1   23.90   15.80
 -13 -11  -2   33.40   11.40
 -13 -11   2   55.49   13.80
 -13 -11   2   19.50   20.30
 -13  11   3    1.80    3.00
  13 -11   3    3.80    7.10
 -13 -11  -3    7.20    8.20
 -13 -11   3   20.90   15.80
 -13 -11   3    3.30    5.80
 -14 -11   0   27.00   10.00
 -14 -11  -1   37.70   10.50
  14 -11   1   35.80   10.90
 -14 -11   1   23.50   11.10
 -14 -11   1   14.50   10.20
 -14 -11  -2   -4.70    8.60
 -14 -11   2    2.60   10.20
   0 -12   0  222.98   42.90
   0 -12  -1  303.67   56.99
   0  12  -2   -0.20    8.60
   0 -12  -2    7.40   14.60
   0 -12   2   20.50    9.30
   0  12   3  674.03  109.99
   0 -12   3  682.33  110.49
   0  12   3  642.74  109.89
   0  12  -3  633.44  110.19
   0 -12  -3  611.14  109.69
   0  12  -3  636.84  110.19
   0 -12  -3  657.83  110.09
   0 -12  -3  622.54  110.29
   0  12   4   14.80   11.90
   0  12  -4   29.90   12.10
   0  12  -4   25.90   12.00
   0  12   4   34.40   11.60
   0 -12  -4   27.80   11.00
   0 -12   4   25.80   12.40
   0 -12  -4   19.40   13.50
   0  12  -5  112.49   23.50
   0 -12   5   84.89   22.30
   0  12   5   84.19   21.80
   0  12   5  115.09   23.40
   0 -12  -5  111.79   22.80
   0  12  -5  102.89   22.80
   0 -12  -5  115.59   23.10
   0 -12  -6   17.30   12.00
   0 -12  -6    4.80   11.20
   0  12  -6    7.80   11.00
   0  12   6   -0.70   11.60
   0  12   6    7.00   11.40
   0  12   7   76.39   14.80
   0  12   7   28.70   11.90
   0 -12  -7   60.59   12.80
   0  12  -7   60.39   13.80
   0 -12  -7   70.09   14.60
   0 -12  -7   47.20   12.40
  -1 -12   0  103.19   23.10
   1 -12   0  100.99   23.90
   1 -12   1  208.78   48.00
  -1 -12  -1  198.78   39.80
   1 -12  -1  191.38   40.40
   1 -12   2  121.49   25.80
   1  12  -2  151.88   26.60
  -1 -12  -2  118.99   26.80
  -1  12   2  126.89   25.30
  -1  12  -2  113.09   26.20
  -1 -12   2  147.59   26.20
   1 -12  -2  119.69   25.80
   1  12   2  195.88   29.00
   1 -12   3  198.78   35.50
  -1  12   3  184.58   34.70
   1 -12   3  203.08   35.30
  -1  12   3  175.88   34.00
  -1 -12  -3  190.08   34.40
  -1 -12  -3  168.28   34.40
  -1 -12  -3  177.68   34.20
   1  12  -3  188.58   34.60
  -1  12  -3  185.88   34.60
  -1  12  -3  193.68   35.00
   1  12   3  210.48   35.40
   1 -12  -3  151.48   33.90
  -1 -12   3  206.48   35.40
   1  12   3  207.08   35.30
   1 -12  -3  181.18   34.80
   1  12  -4  111.19   25.50
  -1 -12  -4  122.49   25.40
   1 -12   4  145.69   27.10
  -1  12   4   84.99   25.50
  -1 -12  -4  113.19   25.50
  -1  12   4  144.49   26.00
   1  12   4  159.08   26.20
  -1  12  -4   96.39   25.00
  -1  12  -4  163.18   26.80
   1  12   4  143.29   26.50
   1 -12  -4  153.78   26.90
  -1 -12   4  129.59   26.60
   1 -12  -4  128.49   25.80
   1 -12   5    8.90   11.90
  -1  12   5   -2.20   11.40
  -1  12   5   -1.40   10.40
  -1 -12  -5    3.50   10.80
  -1 -12  -5   12.50    8.00
   1  12  -5   11.20   11.20
   1  12   5    7.80   12.10
  -1 -12   5  -14.60   13.40
  -1  12  -5  -10.50   10.70
  -1  12  -5   -6.30   10.40
   1 -12  -5   10.60   11.80
   1  12   5   14.90   10.60
   1 -12  -5    7.20    8.40
   1  12  -6   17.10   12.30
  -1  12   6   49.00   11.90
  -1 -12  -6   30.30   13.30
  -1  12   6   40.20   12.90
  -1 -12  -6   26.50   12.80
   1 -12   6   15.60   11.10
  -1  12  -6   49.50   11.60
   1 -12  -6   42.10   11.80
  -1  12  -6   25.60   12.90
   1 -12  -6   22.90   13.40
   1  12   6   19.40   13.30
   1  12   6   44.90   11.40
  -1  12   7   -8.10    8.40
  -1  12   7    4.30    7.20
  -1 -12  -7   22.40    7.90
  -1  12   7   11.00    7.70
   1  12  -7    4.10    9.00
  -1 -12  -7    9.00    7.50
  -1 -12  -7   -4.80    8.70
  -1  12  -7    9.00    9.40
   1 -12  -7   11.70   10.20
   1  12   7    1.70    8.90
  -1  12  -7   18.90    9.90
   1 -12  -7    9.10    7.40
   1  12   7    4.50    6.70
  -2 -12   0  657.63  109.79
   2  12   0  621.94  106.09
   2  12   0  609.74  109.19
  -2 -12  -1    1.00   10.60
   2 -12   1   14.20   12.10
   2  12  -1    4.10    6.50
   2 -12  -1    0.60    9.60
   2 -12  -1  -21.70   11.30
   2  12   1    2.90    7.00
  -2 -12  -2  194.08   32.30
   2  12  -2  130.99   30.90
   2 -12   2  187.18   32.60
   2 -12   2  176.68   32.40
   2  12  -2  180.38   31.90
  -2  12   2  180.28   31.70
  -2 -12   2  181.48   32.60
   2  12   2  175.28   32.30
  -2  12  -2  175.98   31.90
   2 -12  -2  162.28   32.40
   2  12   2  179.88   32.10
  -2  12  -2  158.88   32.00
  -2  12   3   68.89   17.00
  -2 -12  -3   89.19   19.00
   2 -12   3   72.29   17.70
  -2  12   3  129.59   20.20
   2  12  -3   94.79   18.40
   2  12  -3  105.69   20.10
  -2 -12  -3   68.89   17.10
  -2 -12  -3   81.59   17.20
   2 -12   3   75.49   18.40
  -2  12  -3   87.49   18.40
  -2  12  -3   57.79   17.60
   2  12   3   68.69   18.20
   2  12   3   87.09   18.80
  -2 -12   3   91.29   19.00
   2 -12  -3   83.59   18.80
  -2  12   4   58.49   14.70
   2 -12   4   13.10   13.70
  -2 -12  -4   30.40   11.80
  -2  12   4   33.10   12.20
  -2 -12  -4   45.60   13.50
   2  12  -4   42.00   15.30
   2  12   4   23.90   12.80
  -2 -12   4   54.89   16.50
   2  12   4   39.10   12.60
   2 -12  -4   25.60   12.70
  -2  12  -4   47.00   13.10
  -2  12  -4   54.29   13.70
   2 -12  -4   26.00   13.10
  -2 -12  -5  144.49   32.00
   2 -12   5  153.38   32.90
  -2 -12  -5  152.48   32.40
  -2  12   5  219.98   33.10
   2  12  -5  185.98   33.20
  -2  12   5  141.79   32.50
  -2  12  -5  213.08   33.60
   2 -12  -5  180.28   33.30
   2 -12  -5  138.39   32.40
  -2 -12   5  183.68   32.80
   2  12   5  222.18   33.60
  -2  12  -5  136.29   31.90
   2  12   5  202.68   33.70
  -2  12  -5  151.28   32.70
  -2  12   6   24.00   12.70
   2  12  -6   10.20   11.50
   2 -12   6    7.90   10.00
  -2 -12  -6   17.00   10.80
  -2 -12  -6   15.40   12.10
  -2  12   6   18.30   11.30
   2  12   6   -0.90   11.20
   2 -12  -6   17.40   12.30
  -2  12  -6   31.40   10.40
   2 -12  -6   23.80   11.40
   2 -12  -6   32.30   10.40
   2  12   6   40.30   10.40
  -2  12  -6   26.30   12.20
  -2  12   7    0.50    9.70
  -2 -12  -7    7.30   10.00
   2  12  -7   -2.50    6.20
  -2  12   7   -0.60   10.40
  -2  12   7   14.70    8.60
  -2 -12  -7   -3.50    6.00
   2 -12  -7   10.70    7.40
  -2  12  -7   -1.30    8.80
  -2  12  -7   -0.20    6.50
   2  12   7    8.90    9.50
   2  12   7   -9.80    7.80
   2 -12  -7    2.70    9.80
   3  12   0  101.89   24.50
   3 -12   0  127.29   21.20
   3  12   0  112.09   20.50
   3 -12   0   55.09   24.20
   3  12  -1   21.80    7.90
   3 -12   1   17.70   13.40
  -3 -12  -1   33.90    9.50
   3 -12   1   13.10    7.40
  -3 -12  -1   50.29   10.80
   3 -12   1   20.00    9.70
   3 -12  -1   36.50    9.90
   3  12   1   39.00   17.00
  -3 -12   1   18.60    5.40
   3  12   1   32.80    8.90
  -3 -12   1    8.40   10.00
   3 -12  -1  -10.40   13.40
   3  12  -2   72.99   18.10
  -3 -12  -2   81.89   17.00
   3 -12   2   69.39   17.20
   3  12  -2   91.19   16.70
  -3  12   2   68.79   16.50
  -3 -12   2   96.29   18.30
   3 -12  -2   96.29   18.40
  -3  12  -2   64.79   16.70
   3 -12  -2   79.29   17.20
   3 -12  -2   85.09   18.40
   3  12   2   90.49   17.80
  -3 -12   2   48.80   16.50
  -3  12  -2   83.99   17.20
   3 -12   3   78.29   18.60
  -3  12   3   81.39   18.90
   3  12  -3   63.39   17.30
  -3  12   3   95.09   18.30
  -3 -12  -3   87.19   18.40
   3 -12   3   76.19   18.10
  -3 -12  -3  100.99   18.70
   3  12  -3   71.59   18.30
  -3 -12  -3   65.69   18.20
   3  12   3  102.19   19.70
  -3  12  -3   69.09   17.40
  -3  12  -3  102.89   20.10
   3 -12  -3   92.59   19.50
  -3  12  -3   86.49   18.70
  -3 -12   3  111.29   19.70
   3  12  -4  520.85   94.49
  -3 -12  -4  519.75   94.19
  -3 -12  -4  522.15   93.99
  -3  12   4  616.84   95.19
   3 -12   4  537.95   94.79
  -3 -12  -4  512.65   94.09
  -3  12   4  537.15   93.99
   3 -12  -4  605.04   95.19
   3 -12  -4  578.24   94.89
  -3  12  -4  568.54   94.99
  -3  12  -4  558.04   94.39
  -3  12  -4  516.45   94.39
  -3 -12   4  587.64   94.79
   3  12   4  553.94   94.49
   3  12   4  520.15   94.19
  -3 -12  -5   37.20   12.90
   3  12  -5   16.00   12.30
  -3  12   5   26.50   10.50
  -3  12   5   30.10   11.60
   3 -12   5   25.90   13.60
  -3  12  -5   42.80   13.10
   3 -12  -5   10.10   13.10
  -3  12  -5   31.20   11.80
  -3  12  -5   14.20   12.80
   3 -12  -5   15.70   13.10
   3  12   5   22.00   12.70
   3  12   5   26.50   12.90
   3 -12   6   59.29   13.30
  -3 -12  -6   59.79   15.80
  -3  12   6   58.39   16.00
   3  12  -6   44.10   15.20
  -3  12   6   59.99   14.80
  -3  12   6   39.20   13.70
   3 -12  -6   52.59   16.10
  -3  12  -6   61.39   16.50
   3 -12  -6   48.30   15.50
  -3  12  -6   68.19   15.00
  -3  12  -6   52.29   15.50
   3 -12  -6   34.10   15.50
   3  12   6   72.09   15.80
   3  12   6   50.09   14.10
  -3  12   7  101.89   14.80
  -3 -12  -7   90.09   16.00
  -3  12   7   84.09   15.40
   3  12  -7   58.69   14.70
  -3  12   7   19.90   14.60
  -3 -12  -7   95.19   14.70
   3 -12  -7   72.99   14.60
  -3  12  -7   39.80   14.80
   3  12   7   89.49   14.70
   3 -12  -7   41.90   15.10
   3 -12  -7   41.00   14.00
   3  12   7   52.19   14.30
  -4 -12   0   25.10   10.60
   4 -12   0   26.50   10.80
   4  12   0   16.90    7.00
   4  12   0   26.10   15.60
  -4  12   0   27.20    8.80
  -4 -12   0   37.70   10.10
  -4 -12   0   24.90    9.10
   4 -12   0    7.20    7.60
   4  12  -1  121.99   22.30
  -4 -12  -1  111.09   22.70
  -4 -12  -1  126.79   24.20
  -4 -12  -1  127.49   24.10
   4 -12   1  119.09   23.50
  -4  12   1  116.09   22.50
   4  12  -1  120.39   23.80
   4 -12   1   89.69   27.80
   4 -12   1  118.39   22.90
   4  12   1  116.79   22.40
   4  12   1  113.39   23.30
  -4  12  -1  106.89   22.60
   4 -12  -1  114.79   22.80
   4 -12  -1  143.49   25.70
   4 -12  -1  128.89   23.70
  -4 -12   1  119.49   23.20
  -4 -12   1  116.69   24.10
  -4 -12   1  119.19   23.30
   4  12   1   86.29   27.30
  -4  12   2   82.69   19.90
  -4 -12  -2   42.30   14.10
   4  12  -2   74.39   17.00
  -4 -12  -2   79.99   16.00
   4  12  -2   57.59   14.50
  -4 -12  -2  104.39   17.70
   4 -12   2   57.19   15.90
  -4  12  -2   78.69   16.70
   4 -12  -2   65.69   15.40
   4 -12  -2   63.19   16.70
   4 -12  -2   60.69   15.50
  -4 -12   2   68.99   16.40
  -4 -12   2   59.69   15.40
  -4  12  -2   73.79   15.30
   4  12   2   70.19   15.40
   4  12  -3   77.69   16.40
   4  12  -3   68.79   15.90
  -4  12   3   68.99   15.00
  -4 -12  -3   72.09   16.40
   4 -12   3   41.10   16.00
  -4 -12   3   79.39   16.70
  -4  12  -3   73.39   16.80
   4  12   3   64.99   17.00
   4 -12  -3   80.79   15.80
  -4  12  -3   45.70   15.10
   4 -12  -3   64.49   17.20
  -4 -12   3  107.19   18.60
   4 -12   4    2.20   11.00
   4  12  -4    3.60    8.20
  -4 -12  -4    5.10    8.30
  -4  12   4    0.70    8.90
   4 -12   4   10.40    9.90
  -4 -12  -4    1.40    8.60
  -4  12   4    1.00   11.00
   4  12  -4   -6.00    9.70
  -4 -12   4    5.60   11.40
  -4  12  -4    5.20    9.70
   4  12   4  -13.50   10.10
  -4 -12   4   -3.20    4.60
  -4  12  -4   -2.40   10.70
   4 -12  -4   14.10   11.50
  -4  12   5  149.19   24.80
  -4 -12  -5  159.18   29.10
   4  12  -5  187.58   30.00
  -4  12   5  140.69   27.80
   4 -12   5  111.59   28.40
  -4  12   5  187.08   30.10
  -4  12  -5  127.99   28.30
   4 -12  -5  122.59   28.90
  -4  12  -5  130.19   28.80
   4  12   5  121.59   28.90
   4 -12  -5  162.38   30.40
  -4  12   6   52.19   15.50
   4 -12   6   71.89   13.40
  -4  12   6   59.49   14.00
   4  12  -6   41.60   14.30
  -4  12   6   55.69   13.40
  -4 -12  -6   34.10   14.50
   4 -12  -6   46.90   15.20
  -4  12  -6   54.19   14.50
  -4  12  -6   50.99   13.30
   4  12   6   29.10   14.20
   4 -12  -6   38.60   15.10
   4 -12  -6   55.59   13.40
  -4  12   7   43.30    8.90
   4  12  -7   16.70    9.50
  -4 -12  -7   28.20    8.30
  -4 -12  -7   37.40    8.70
  -4  12   7   17.50   11.00
  -4  12   7   16.20   10.50
  -4  12  -7   30.90    8.90
   4 -12  -7   26.30    7.60
   4  12   7   18.90    9.70
  -4  12  -7   12.20    9.60
   4 -12  -7   10.10    8.00
   4 -12  -7   25.30    8.70
   5 -12   0  251.07   39.60
  -5  12   0  195.38   39.10
  -5 -12   0  232.08   40.80
   5  12   0  191.98   39.60
   5  12   0  239.68   39.00
  -5 -12   0  245.28   40.20
  -5 -12   0  196.48   40.50
   5  12  -1   86.59   20.50
  -5  12   1  108.59   20.60
  -5 -12  -1  104.39   20.70
   5 -12   1   88.79   20.30
   5 -12   1  111.59   21.40
  -5 -12  -1  100.89   21.10
   5  12  -1  106.99   20.00
  -5 -12  -1  137.19   22.70
  -5 -12  -1  105.89   21.90
  -5 -12   1  107.39   21.60
   5  12   1  112.29   20.10
   5 -12  -1  105.79   21.70
   5  12   1  105.89   22.10
  -5 -12   1  112.69   21.10
   5 -12  -1   91.39   21.60
  -5 -12   1   95.29   21.90
   5 -12  -1  101.39   20.80
  -5  12  -1   97.39   21.00
  -5  12  -1   88.59   20.50
   5  12  -2  117.39   24.00
  -5 -12  -2  123.99   24.00
   5  12  -2  117.99   23.30
   5 -12   2   80.99   22.80
  -5 -12  -2  142.59   24.60
   5 -12   2  106.79   24.00
  -5  12   2  116.29   23.60
  -5 -12  -2  108.19   24.00
  -5 -12   2  131.09   25.10
   5 -12  -2  121.19   24.90
  -5  12  -2  174.98   26.20
  -5 -12   2  142.29   25.40
   5  12   2  132.39   24.00
  -5  12  -2  126.89   24.20
   5 -12  -2  139.59   24.30
  -5  12   3   31.40    9.60
   5  12  -3   19.20   12.60
   5  12  -3    5.00    9.80
   5 -12   3   29.70   11.90
  -5 -12  -3   16.90   10.70
   5 -12  -3   24.00   11.70
  -5 -12   3   31.10   11.50
  -5  12  -3   32.50   11.70
   5  12   3   13.10   11.00
   5 -12  -3   39.50   12.50
  -5  12  -3   25.00   10.70
  -5 -12   3   33.30   13.00
   5  12  -4   98.49   22.90
  -5  12   4  102.39   22.20
  -5 -12  -4  141.89   23.30
  -5 -12  -4   90.19   22.30
  -5  12   4  119.99   19.30
  -5  12   4   63.39   23.50
   5  12  -4   89.79   21.90
   5 -12   4  108.29   24.00
  -5 -12   4  118.89   24.70
   5 -12  -4   91.89   22.90
   5  12   4  102.09   23.40
  -5  12  -4  137.59   24.70
   5 -12  -4  105.99   23.80
  -5  12  -4  121.19   24.20
  -5  12   5   28.70   10.50
  -5 -12  -5   19.60   10.90
   5 -12   5    6.20   12.00
   5  12  -5   21.30   11.50
  -5  12   5   27.80   10.80
  -5  12   5   30.10   13.70
   5  12   5    1.40   11.60
   5 -12  -5   16.90   13.30
  -5  12  -5   33.20   12.20
  -5  12  -5   42.20   13.10
   5 -12  -5   23.90   12.70
  -5  12   6  103.99   18.50
  -5  12   6   49.50   19.90
   5  12  -6  110.79   19.00
   5 -12   6   74.49   19.30
  -5 -12  -6   67.49   19.20
  -5 -12  -6  116.79   20.50
  -5  12   6  123.69   19.90
   5 -12  -6  108.99   20.10
  -5  12  -6  108.89   19.50
   5  12   6   85.79   18.60
  -5  12  -6  103.09   20.80
   5 -12  -6   73.99   19.80
   5 -12  -6   55.89   19.80
  -5  12   7    1.30    8.40
  -5  12   7   -1.70    6.20
  -5 -12  -7   -8.80    5.30
  -5 -12  -7    7.20    5.90
   5  12  -7   -0.20    5.40
   5 -12  -7   -3.00    7.80
   5 -12  -7    4.20    5.30
  -5  12  -7    0.90    5.70
   5 -12  -7    0.40    6.10
   5  12   7   -7.50    6.60
  -6  12   0   51.09   11.80
  -6 -12   0   49.90   15.00
   6  12   0   53.29   14.00
  -6 -12   0   59.99   12.80
  -6 -12   0   57.19   15.10
  -6 -12   0   44.20   14.80
   6 -12   0   41.30   12.30
   6  12   0   27.60   10.70
  -6 -12  -1  105.79   18.70
  -6 -12  -1   66.49   16.40
  -6 -12  -1   61.89   17.70
   6 -12   1   59.99   16.20
   6  12  -1   63.99   15.50
   6 -12   1   60.29   15.20
   6  12  -1   83.69   17.90
  -6  12   1   86.69   15.80
  -6 -12  -1   87.99   17.80
  -6 -12   1   87.79   19.20
   6 -12  -1   72.49   16.50
  -6 -12   1   65.39   16.80
   6 -12  -1   79.29   19.60
  -6 -12   1   87.99   19.00
  -6 -12   1   93.59   18.30
   6  12   1   66.39   16.90
   6 -12  -1   59.89   16.90
  -6  12  -1   78.69   17.10
  -6  12  -1   67.69   17.10
   6  12   1   82.99   16.10
  -6  12   2   -0.80    6.50
   6 -12   2    5.90    9.00
  -6 -12  -2   16.00    9.50
   6  12  -2    8.70    7.90
  -6 -12  -2   -2.00    7.80
  -6 -12  -2   11.50   10.10
   6 -12   2    1.80    9.10
   6  12  -2   -0.10   11.10
  -6 -12   2   -5.30    4.30
   6 -12  -2    3.40    7.40
   6 -12  -2   16.70   12.10
  -6 -12   2    2.20   10.70
   6  12   2   -3.20    7.00
  -6  12  -2   16.80    9.10
  -6 -12   2  -11.70   10.30
  -6 -12   2   -6.70    6.80
  -6  12  -2   12.40    9.50
   6  12  -3   85.79   19.90
   6 -12   3   74.99   18.80
  -6  12   3   80.89   14.40
   6  12  -3   71.79   17.50
  -6 -12  -3  115.19   20.10
  -6  12   3   66.39   16.60
   6 -12  -3   87.79   17.90
   6  12   3  102.59   19.70
   6 -12  -3   47.30   19.60
  -6  12  -3   68.09   19.20
   6  12   3   70.59   17.60
  -6 -12   3   94.49   20.00
  -6  12  -3   86.89   19.00
  -6 -12   3   91.89   20.40
  -6 -12   3   90.29   19.50
   6 -12   4   46.10   17.60
  -6  12   4   78.49   13.00
   6  12  -4   63.79   16.10
  -6  12   4   72.39   20.10
  -6  12   4   72.99   16.90
   6  12  -4   70.39   16.90
  -6 -12  -4   89.59   18.00
  -6 -12  -4   49.90   17.00
  -6  12  -4   52.19   17.30
   6 -12  -4   36.60   16.50
  -6 -12   4  107.89   19.80
  -6  12  -4   60.29   18.20
   6 -12  -4   66.29   18.50
  -6 -12   4   46.40   21.20
   6  12   4   83.99   18.60
   6  12  -5   66.09   15.80
  -6  12   5   53.59   18.50
   6 -12   5   84.79   17.40
  -6  12   5   58.49   11.00
  -6 -12  -5   95.19   17.00
  -6  12   5   87.59   14.70
  -6  12   5   89.59   18.30
   6  12  -5  104.09   20.90
   6 -12  -5   91.59   18.80
  -6  12  -5   84.49   17.90
  -6  12  -5   58.89   16.80
   6 -12  -5   83.59   17.50
   6  12   5   26.30   15.80
  -6  12   6   10.90   13.50
  -6  12   6   65.39   14.30
  -6 -12  -6   53.09   13.00
   6 -12   6   29.70   12.70
  -6 -12  -6   42.70   12.80
  -6  12   6   75.79   11.70
   6  12  -6   61.79   12.70
   6 -12  -6   51.09   13.60
   6 -12  -6   38.90   11.80
  -6  12  -6   73.19   14.60
   6  12   6   19.20   12.30
  -6  12  -6   20.50   12.20
   6 -12  -6   32.90   13.80
  -7 -12   0    4.80    8.60
  -7 -12   0   -1.30   10.70
   7  12   0   -5.00    6.50
  -7 -12   0   -3.90   12.90
   7 -12   0    1.50    8.20
   7  12   0    3.60   15.60
  -7 -12   0   -5.50    5.10
  -7 -12  -1   38.00   11.80
   7  12  -1   24.20    9.40
   7 -12   1   25.90   12.10
  -7 -12  -1   27.20   10.40
  -7 -12  -1   35.60   14.00
  -7 -12  -1   41.40   13.20
   7 -12   1   33.90    9.50
  -7  12   1   51.69   10.30
  -7 -12   1   51.79   12.10
   7  12   1   35.60    9.80
  -7 -12   1   15.40   13.00
  -7 -12   1   34.60   12.00
   7 -12  -1   45.60   15.40
   7 -12  -1   18.60   10.20
  -7 -12   1   26.70   10.70
   7 -12  -1   30.80   11.90
  -7 -12   1    8.30    9.00
  -7  12  -1   50.59   11.70
  -7  12  -1   33.30   12.10
   7  12   1   36.10   13.00
  -7  12   2   77.79   19.80
  -7  12   2   74.99   16.60
   7  12  -2  104.89   17.90
  -7 -12  -2   98.79   20.00
   7 -12   2   82.19   18.20
   7 -12   2   50.09   17.50
  -7 -12  -2   54.89   18.40
  -7  12  -2   91.49   18.40
   7  12   2   99.79   18.50
  -7 -12   2   71.79   18.20
   7 -12  -2   96.59   21.20
   7 -12  -2   83.29   17.40
  -7  12  -2   87.99   21.00
  -7 -12   2  140.19   22.50
  -7 -12   2   95.29   20.00
   7  12  -3   79.89   22.00
   7  12  -3   77.99   16.80
  -7  12   3   71.79   16.30
  -7  12   3   47.10   19.60
  -7 -12  -3   63.09   18.60
  -7 -12  -3  101.29   21.00
   7 -12   3  109.09   19.70
  -7 -12   3  113.59   21.20
  -7  12  -3   64.99   18.00
  -7 -12   3   72.09   19.60
   7  12   3   98.99   19.30
   7  12   3  116.99   20.00
  -7 -12   3   85.39   19.30
   7 -12  -3   70.69   18.70
   7 -12  -3   75.59   18.50
  -7  12  -3   71.19   18.80
   7 -12   4   18.30   11.30
  -7  12   4   14.70    7.50
   7  12  -4   28.40   11.20
  -7 -12  -4   14.00   10.30
   7  12  -4   17.30   10.30
  -7  12   4   -1.30   13.30
  -7 -12   4    4.80   12.50
  -7  12  -4   -1.60   10.30
   7  12   4    5.40   10.50
  -7  12  -4   -0.40   10.70
   7 -12  -4   11.90   10.70
   7 -12  -4   10.20    9.90
  -7 -12   4   -5.00    8.30
  -7  12   5   75.19   19.50
  -7 -12  -5   85.09   18.80
   7 -12   5   64.29   19.00
  -7 -12  -5   96.09   19.10
   7  12  -5   36.80   22.50
   7  12  -5   72.19   18.30
  -7  12  -5  139.19   20.70
   7  12   5  136.39   21.10
   7 -12  -5   80.59   19.00
  -7  12  -5  111.19   20.60
   7 -12  -5   60.79   20.50
  -7 -12  -6   52.69   10.90
  -7  12   6   63.39   12.50
   7  12  -6   37.10   11.00
   7 -12   6   35.10   10.30
  -7 -12  -6   38.80   11.10
  -7  12  -6    7.50   10.90
   7 -12  -6   44.80   13.90
   7 -12  -6   27.10   10.30
   7  12   6   29.10   10.90
  -7  12  -6   51.79   10.70
   7 -12  -6   52.49   12.00
  -8 -12   0  247.08   45.30
   8  12   0  261.67   43.90
  -8 -12   0  225.98   45.30
  -8 -12   0  279.27   45.40
  -8  12   0  228.98   43.30
   8 -12   0  281.57   44.50
  -8 -12   0  220.68   46.90
  -8 -12  -1  130.89   24.60
   8  12  -1  113.79   22.50
   8 -12   1  115.49   23.70
  -8  12   1  129.99   22.50
  -8 -12  -1  190.08   27.80
  -8 -12  -1  110.19   24.10
  -8 -12  -1  135.19   26.50
   8 -12   1   89.29   22.10
  -8 -12   1   83.29   22.70
   8 -12  -1  116.19   25.50
   8 -12  -1  136.79   23.50
   8  12   1  102.39   21.90
  -8  12  -1  109.29   22.90
   8 -12  -1  101.99   25.80
  -8 -12   1  129.29   27.50
  -8 -12   1  158.88   27.10
  -8 -12   1  120.69   24.70
   8 -12   2   83.59   18.10
  -8 -12  -2   98.49   20.30
   8  12  -2   88.89   17.20
   8 -12   2   72.99   17.80
  -8 -12  -2  103.09   20.40
  -8  12  -2   50.29   18.50
  -8 -12   2   69.19   19.00
  -8 -12   2   80.59   20.70
  -8 -12   2  103.89   21.50
   8 -12  -2   98.09   21.00
   8  12   2   88.29   17.90
   8 -12  -2   55.39   16.50
  -8  12  -2   75.29   18.10
   8 -12   3   26.70   11.40
  -8  12   3   16.50   15.80
   8  12  -3    6.70    9.30
   8 -12   3    7.60   11.40
  -8 -12  -3   17.50   10.70
  -8 -12  -3   12.10    9.30
   8  12   3    1.80   10.80
   8 -12  -3   -7.50    9.50
  -8  12  -3   12.00    9.80
   8 -12  -3   17.20   10.40
  -8 -12   3   16.70   12.40
  -8 -12   3    6.00   10.30
  -8 -12   3   26.60   13.90
   8  12   3   23.80   11.00
  -8  12  -3   16.60   12.40
  -8 -12   3    8.40   10.10
  -8  12   4    6.80   16.20
   8  12  -4   20.80    9.20
   8 -12   4   17.00    9.00
  -8 -12  -4   28.60   11.20
  -8 -12   4    2.70   10.10
   8  12   4   34.80   12.30
  -8 -12   4   12.70   14.60
  -8  12  -4   21.70   12.70
   8 -12  -4   19.00   10.30
   8 -12  -4   10.10   10.30
  -8  12  -4   23.60   11.10
   8 -12   5   14.00   10.60
  -8  12   5    0.30    2.20
  -8 -12  -5    0.50    8.20
   8 -12   5   11.70    8.70
  -8  12   5  -10.60    8.90
  -8  12  -5    2.40    9.40
   8 -12  -5   -0.20   11.00
  -8 -12   5   -0.30    4.90
  -8 -12   5  -20.00   11.60
   8 -12  -5    8.10    9.00
  -8  12  -5   -2.00    7.10
   8  12   5    4.30    9.60
  -8 -12  -6   17.70    8.80
  -8 -12  -6   28.80    8.70
  -8  12   6   17.80    8.20
   8 -12   6   13.10    8.90
  -8  12  -6   10.00    6.90
   8 -12  -6   -0.30    8.30
   8 -12  -6   27.70   10.80
  -8  12  -6   20.60    8.50
   8 -12  -6    8.40    7.60
   9 -12   0   29.80   10.10
  -9 -12   0   47.30   18.50
  -9 -12   0   33.70   12.40
  -9 -12   0   37.60   20.80
   9  12   0   40.10   10.30
  -9 -12   0   23.10   12.20
  -9 -12  -1  127.19   24.30
   9 -12   1  102.19   22.20
   9  12  -1  125.69   21.90
  -9 -12  -1  139.99   25.60
  -9 -12  -1  103.39   23.70
  -9 -12   1  115.79   28.50
   9 -12  -1   94.99   22.00
  -9 -12   1  148.79   26.00
  -9 -12   1  122.79   24.20
   9 -12  -1   70.69   22.20
   9  12   1   99.99   21.50
   9 -12   2   -0.70    7.60
  -9 -12  -2   17.90   11.40
  -9  12   2   -2.00    3.80
  -9 -12  -2    3.60    8.80
   9  12  -2   -6.80    8.60
   9 -12   2   10.60    9.90
   9  12   2    7.10    7.70
  -9 -12   2    4.90   11.50
  -9 -12   2    3.10   12.40
  -9  12  -2    4.80    8.60
  -9  12  -2   12.50   12.60
  -9 -12   2   12.60   11.40
  -9 -12   2   -4.70   15.90
   9 -12  -2    9.60    9.30
   9 -12   3   66.19   14.20
   9  12  -3   56.79   12.50
  -9 -12  -3   68.29   14.10
  -9  12   3   32.60   17.60
  -9 -12  -3   41.30   15.10
   9 -12   3   48.30   14.90
  -9 -12   3   44.60   15.00
   9 -12  -3   29.40   12.10
   9  12   3   62.29   14.60
  -9  12  -3   53.69   14.00
  -9 -12   3   57.49   18.50
  -9 -12   3   31.80   13.40
  -9  12  -3   33.50   15.80
   9  12   3   60.29   14.60
   9  12  -4  -13.10    9.40
   9 -12   4   -4.40   10.50
  -9 -12  -4   -0.90    7.60
  -9  12   4    8.80   10.80
  -9  12   4   -1.90    3.40
   9 -12  -4    8.60    9.60
  -9  12  -4    6.60   11.20
  -9 -12   4    0.50   10.20
  -9 -12   4   16.80   14.90
   9  12   4    3.10    7.00
  -9  12  -4   -0.90    8.00
   9 -12   5    7.20    7.40
  -9  12   5    8.90    9.20
  -9  12   5    1.30    3.00
   9 -12   5    1.70    8.80
   9  12   5    2.50    8.20
  -9  12  -5    6.90    7.10
  -9 -12   5   -7.20   11.70
  -9  12  -5   21.10    7.90
   9 -12  -5   13.80    7.80
  -9 -12   5   -4.40    6.80
   9 -12   6    2.00    9.30
   9 -12  -6   11.10    8.80
  -9  12  -6   10.60    8.90
 -10 -12   0   51.29   15.40
 -10 -12   0   41.60   22.40
 -10  12   0    8.80    5.70
  10 -12   0   16.10    9.60
  10  12   0   37.70    9.30
 -10 -12   0   19.00   10.70
 -10 -12  -1    5.90   12.70
 -10  12   1   -1.60    3.70
 -10 -12  -1    4.10   11.30
  10  12  -1    6.80    7.80
  10 -12   1   10.40    7.70
 -10 -12  -1    2.80   10.80
 -10 -12   1   14.30   21.50
  10  12   1   -3.30    8.30
 -10 -12   1    5.00   12.60
  10 -12  -1    9.80    9.80
 -10 -12   1    3.90   11.10
 -10 -12   1   15.70   11.60
 -10 -12  -2   58.69   13.50
  10 -12   2   42.70   12.70
  10 -12   2   60.29   13.80
  10  12  -2   48.80   12.10
 -10 -12  -2   58.49   13.80
  10  12   2   40.30   13.00
 -10 -12   2   18.50   14.00
 -10 -12   2   57.79   21.00
 -10 -12   2   56.39   13.50
  10 -12  -2   23.70   10.70
 -10 -12   2   47.60   14.30
  10 -12   3   57.19   13.60
  10 -12   3   37.20   11.80
 -10  12   3   46.40   22.50
 -10 -12  -3   39.40   13.40
  10  12  -3   51.99   12.30
  10  12   3   27.10   11.70
 -10 -12   3   52.49   18.20
 -10 -12   3   20.20   10.50
 -10  12  -3   77.09   13.60
  10 -12  -3   41.70   10.90
 -10  12   4   27.90   10.50
  10 -12   4   11.90   10.80
 -10 -12   4   -2.60   10.20
 -10 -12   4   28.40   15.60
 -10  12  -4   16.50   10.70
  10  12   4   14.00    6.80
  10 -12   5   20.90    8.80
 -10  12   5   23.00   10.10
  10 -12   5   32.80   10.10
 -10 -12   5   15.40   12.40
  10 -12  -5   45.60   11.30
 -10  12  -5   49.90   10.00
  11 -12   0   43.90   14.80
 -11 -12   0  118.99   19.70
 -11 -12   0  112.09   26.50
  11  12   0   69.29   14.90
 -11 -12  -1    6.60   14.60
  11 -12   1    5.30    8.80
 -11  12   1    2.20    3.60
 -11 -12  -1   18.70   13.00
  11  12  -1    5.90    8.10
 -11 -12  -1   -1.90   10.80
 -11 -12   1   -2.70    8.50
 -11 -12   1  -13.70   15.60
 -11 -12   1    6.60   10.20
  11 -12  -1    1.80    7.00
  11  12   1    5.90    9.00
  11 -12   2    1.30    8.60
  11 -12   2   21.80    8.90
 -11  12   2    1.90    2.80
  11  12  -2   25.80    9.10
 -11 -12  -2    8.30   12.20
  11  12   2    3.70   10.00
  11 -12  -2    2.90    9.00
 -11 -12   2    9.30   12.10
  11  12   2   20.60   10.20
 -11 -12   2    9.00    8.60
 -11 -12   2   28.20   21.00
  11 -12   3   18.30    9.90
 -11 -12  -3    0.90    9.20
 -11  12   3    1.00    2.70
 -11 -12   3    7.20   11.50
 -11 -12   3    8.80   17.10
  11  12   3   15.30    9.20
 -11  12   4   23.90   10.70
  11 -12   4   19.00    7.40
 -11 -12   4    5.00    6.40
 -11 -12   4   13.90   14.40
 -12 -12   0   15.80   17.80
  12 -12   0  -13.20   10.30
 -12 -12   0   -8.30   11.70
 -12 -12  -1   45.30   16.80
 -12 -12   1   59.69   17.30
 -12 -12   1   59.19   24.70
 -12 -12  -2    1.00   11.40
  12  12   2   -9.30    7.70
 -12 -12   2   13.60    8.30
 -12 -12   2   13.20    9.80
 -12 -12   2    7.90   13.90
 -12 -12  -3   11.00    8.70
  12 -12   3   19.00    6.90
 -12 -12   3   39.60   12.90
 -12 -12   3    4.70    6.50
 -12  12   4    0.70    2.00
  12 -12   4   -3.60    7.00
  12 -12   4    0.90    8.70
 -12 -12   4   -2.40    3.70
  12 -12  -4    1.20    5.50
 -12 -12   4    7.40    9.00
 -13 -12   0    4.40   12.70
 -13 -12   0    7.10    8.60
 -13 -12  -1   14.80    9.70
 -13 -12   1   16.30   12.20
  13  12   1   16.40    7.00
 -13 -12   1   33.30   13.90
 -13 -12  -2   17.00    8.50
 -13 -12   2   28.90   12.50
 -13 -12   2    3.00    9.70
 -13 -12  -3    4.60    4.90
  13 -12   3    7.40    7.10
 -13  12   3    0.50    1.80
 -13 -12   3    1.10    4.00
 -13 -12   3    8.60    9.70
 -14 -12   0   -4.40    6.60
  14 -12   1   27.00   12.60
 -14 -12  -1   77.29   13.50
 -14 -12   1   61.59   12.20
 -14 -12   1   29.60   12.40
   0 -13   0    0.10   10.70
   0 -13   1  250.67   47.10
   0  13   1  316.37   49.60
   0 -13  -1  240.08   47.10
   0 -13  -1  297.17   52.89
   0  13  -1  287.97   48.70
   0 -13   1  265.67   47.30
   0  13   2  194.68   38.30
   0  13  -2  206.78   37.80
   0  13   2  200.18   37.20
   0  13  -2  197.38   37.60
   0 -13  -2  210.18   37.50
   0 -13   2  210.68   38.10
   0 -13  -2  231.08   38.50
   0 -13  -2  207.58   40.60
   0 -13   2  205.28   38.40
   0  13   3    5.10   10.40
   0 -13  -3    9.40    7.90
   0 -13   3    0.20    9.70
   0 -13  -3   -3.80    7.80
   0  13   3   13.10    9.00
   0  13  -3   -2.00    9.10
   0  13  -3    0.40    9.20
   0 -13  -3    6.30   12.60
   0  13  -4   72.29   19.00
   0  13   4   95.39   20.10
   0 -13  -4   60.09   18.70
   0 -13  -4   90.59   18.30
   0 -13   4   80.39   19.80
   0  13  -4   85.39   19.10
   0  13   4   78.49   18.70
   0  13   5   20.90   11.60
   0 -13  -5   -2.40   10.60
   0  13   5    6.00   11.30
   0 -13  -5    3.10   11.30
   0 -13   5    4.20   11.50
   0  13  -5    8.40   12.20
   0  13  -5   11.70   11.30
   0  13   6  -10.10    7.30
   0 -13  -6   10.10   11.50
   0 -13  -6   -7.80   10.20
   0 -13   6   -7.40    9.40
   0  13   6    7.70   10.60
   0  13  -6    0.10   10.40
   0  13  -7   -6.50    8.50
   0  13   7  -12.20    5.70
   0 -13  -7    9.40    9.10
   0  13   7    0.60    8.40
   0  13   7   -3.00    6.40
   0 -13  -7   -2.50    9.00
   1 -13   0   31.80   10.90
  -1 -13   0   23.30   10.30
   1 -13   0   50.49   15.40
   1 -13   1  322.87   57.39
  -1 -13  -1  356.26   57.39
   1  13  -1  290.07   57.29
   1 -13   1  361.16   57.69
  -1 -13  -1  411.16   63.89
  -1 -13   1  338.97   57.39
   1  13   1  313.17   57.49
  -1  13  -1  296.47   58.59
   1 -13  -1  274.27   60.89
   1 -13  -1  325.27   57.99
   1 -13  -1  317.27   57.19
  -1 -13   1  349.96   58.19
   1 -13   2   56.49   13.50
  -1 -13  -2   48.20   13.10
  -1  13   2   34.70   11.90
  -1  13   2   39.80   13.40
  -1 -13  -2   36.30   12.90
   1 -13   2   48.30   15.20
   1  13  -2   71.39   13.80
   1  13   2   44.90   13.40
[truncated: 1,286,468 more chars]
